# Supplementary material for: Synthesis and application of novel P-chiral monophosphorus ligands
Source: Royal Society of Chemistry journal article supplement (doi:10.1039/d1qo01819a), 2022-01-01

## Supporting Information

### Synthesis and application of novel P-chiral monophosphorus ligands

Xiaoxiao Xie<sup>a</sup>, Sanliang Li<sup>a</sup>, Qiaoyu Chen<sup>b</sup>, Hao Guo<sup>\*a</sup>, Junfeng Yang<sup>\*a</sup>,  
and Junliang Zhang<sup>\*a</sup>

E-mail: hguo@fudan.edu.cn; jfyang@fudan.edu.cn; junliangzhang@fudan.edu.cn

<sup>a</sup>Department of Chemistry, Fudan University, 2005 Songhu Road, Shanghai, 200438,  
China

<sup>b</sup>Academy of for engineering and technology, Fudan University, Shanghai, 200438,  
China

### Contents

|                                                     |            |
|-----------------------------------------------------|------------|
| <b>1. General Information .....</b>                 | <b>S2</b>  |
| <b>2. Optimization of reaction conditions .....</b> | <b>S3</b>  |
| <b>3. General procedure .....</b>                   | <b>S5</b>  |
| <b>4. Gram-scale synthesis of 5c .....</b>          | <b>S42</b> |
| <b>5. Reference .....</b>                           | <b>S50</b> |
| <b>6. NMR spectra of products: .....</b>            | <b>S52</b> |

## 1. General Information

All reactions were carried out under an atmosphere of nitrogen in flame-dried sealed tube with magnetic stirring. The  $[\alpha]_D$  was recorded using PolAAr 3005 High Accuracy Polarimeter.  $^1\text{H}$  NMR spectra,  $^{13}\text{C}$  NMR spectra,  $^{19}\text{F}$  NMR spectra and  $^{31}\text{P}$  NMR spectra were recorded on a Bruker 400 MHz spectrometer in  $\text{CDCl}_3$ . All signals are reported in  $\delta$  units, parts per million (ppm), and were referenced to  $\text{CDCl}_3$  ( $\delta$  7.26 ppm for  $^1\text{H}$  NMR and 77.0 ppm for  $^{13}\text{C}$  NMR) as the internal standard. Data for  $^1\text{H}$  NMR spectra are reported as follows: chemical shift (ppm; s = singlet, d = doublet, t = triplet, dd = doublet of doublets, m = multiplet), coupling constant (Hz), and integration. Data for  $^{13}\text{C}$  NMR are reported in terms of chemical shift (ppm) relative to residual solvent peak ( $\text{CDCl}_3$ : 77.0 ppm). HRMS spectra were recorded on GCQTOF 7200 and Bruker McriOTOF11. SAESI-MS spectra were recorded on a Thermo TSQ Quantum Access triplequadrupole mass spectrometer (Thermo Fisher Scientific, Waltham, MA) equipped with a home-made SAESI ion source in positive mode. The instrumentation used for the crystal measurement was D8 VENTURE MetalJet. Reactions were monitored by thin layer chromatography (TLC) using silica gel plates. Toluene and  $\text{CH}_2\text{Cl}_2$  was freshly distilled from  $\text{CaH}_2$ ; THF, mesitylene, xylene and dioxane were freshly distilled from sodium metal prior to use; EtOAc (AR grade), DCE (AR grade),  $\text{CH}_3\text{OH}$  (AR grade) and *n*-hexane (anhydrous) were purchased from Sinopharm. Flash column chromatography was performed on silica gel 60 (particle size 200-400 mesh ASTM, purchased from Yantai, China) and eluted with  $\text{CH}_3\text{OH}$ / ethyl acetate or petroleum ether/ethyl acetate. The substrates ( $\pm$ )**1**<sup>[1]</sup>, and **X1**<sup>[3]</sup> were synthesized according to published procedures, the others are commercially available. The spectral data of the substrates were consisted with that reported in the literature. The enantiomeric excesses of the products were determined by chiral stationary phase Shimadzu HPLC using a Chiralpak AD-H, IC, OD-H, OZ-H.

## 2. Optimization of reaction conditions

### 2.1 Table S1. Investigate the effect of the amount of palladium source on the reaction

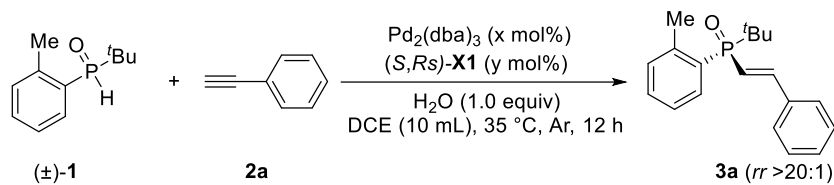

| Entry | x | y  | Yield [%] <sup>[a]</sup> | ee [%] <sup>[b]</sup> |
|-------|---|----|--------------------------|-----------------------|
| 1     | 5 | 15 | 84                       | 98                    |
| 2     | 4 | 12 | 81                       | 96                    |
| 3     | 3 | 9  | 79                       | 97                    |
| 4     | 2 | 6  | 72                       | 97                    |
| 5     | 1 | 3  | 60                       | 97                    |
| 6     | 2 | 5  | 74                       | 90                    |
| 7     | 2 | 4  | 69                       | 85                    |

Reaction conditions: (±)-1 (2 mmol, 2.0 equiv.), **2a** (1 mmol, 1.0 equiv.), H<sub>2</sub>O (1.0 equiv), DCE (10 mL), under argon atmosphere, 12 h. [a] Isolated yield, the ratio of regioselectivities (3:3' > 20:1 in all conditions) were determined by <sup>1</sup>H NMR analysis of the crude product [b] Enantiomeric excesses were determined by HPLC on chiral stationary phases.

### 2.2 Table S2. Investigate the effect of amount of substrates on the reaction

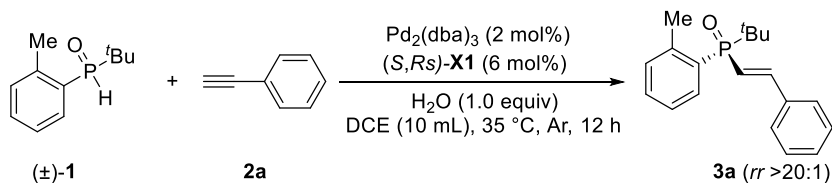

| Entry | <b>1</b> (mmol) | <b>2a</b> (mmol) | Yield [%] <sup>[a]</sup> | ee [%] <sup>[b]</sup> |
|-------|-----------------|------------------|--------------------------|-----------------------|
| 1     | 1.8             | 1                | 76                       | 98                    |
| 2     | 1.9             | 1                | 82                       | 98                    |
| 3     | 2.0             | 1                | 72                       | 97                    |
| 4     | 2.1             | 1                | 68                       | 97                    |
| 5     | 2.2             | 1                | 61                       | 97                    |
| 6     | 15.2            | 8                | 80                       | 98                    |

Reaction conditions:  $\text{Pd}_2(\text{dba})_3$  (2 mol%),  $(S,Rs)\text{-X1}$  (6 mol%),  $\text{H}_2\text{O}$  (1.0 equiv), DCE (10 mL), under argon atmosphere, 12 h. [a] Isolated yield, the ratio of regioselectivities ( $3:3'$  > 20:1 in all conditions) were determined by  $^1\text{H}$  NMR analysis of the crude product. [b] Enantiomeric excesses were determined by HPLC on chiral stationary phases.

### 2.3 Table S3. Investigate the effect of bases on the reaction

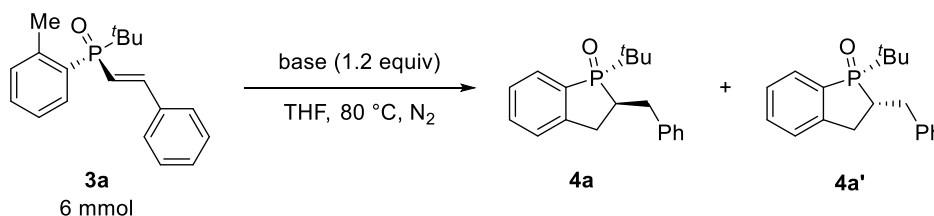

| Entry | Base                    | Yield ( <b>4a</b> + <b>4a'</b> ) [%] <sup>[a]</sup> | dr <sup>[b]</sup> |
|-------|-------------------------|-----------------------------------------------------|-------------------|
| 1     | $t\text{BuOLi}$         | 56                                                  | 1:1               |
| 2     | $t\text{BuONa}$         | 61                                                  | 2:1               |
| 3     | $t\text{BuOK}$          | 65                                                  | 2:1               |
| 4     | $\text{CH}_3\text{ONa}$ | ND <sup>[c]</sup>                                   | /                 |
| 5     | NaOH                    | ND <sup>[c]</sup>                                   | /                 |
| 6     | KOH                     | ND <sup>[c]</sup>                                   | /                 |

Reaction conditions: **3a** (6 mmol, 1.0 equiv.), THF (30 mL), under Nitrogen atmosphere, 24 h. [a] Isolated yield. [b] dr were determined by  $^1\text{H}$  NMR analysis of the crude product. [c] ND = Not detected.

### 3. General procedure

**General procedure A:** A sealed tube with a magnetic stir bar was charged with  $\text{Pd}_2(\text{dba})_3$  (0.16 mmol), (*S, R\_S*)-**X1** (0.48 mmol), racemic SPO (15.2 mmol), alkyne (8.0 mmol) and water (8.0 mmol). Anhydrous DCE (80.0 ml) was then added as solvent. The reaction tube was sealed, frozen by liquid nitrogen and evacuated under vacuum and backfilled with argon three times through a three-way stopcock. The reaction tube was sealed and allowed to stir at 35°C for 24-36 h. On completion (monitored by TLC), the mixture was concentrated in vacuum and the residue was purified by flash column chromatography on silica gel with petroleum ether-ethyl acetate as eluent to give the desired product **3**.<sup>[1]</sup> Product **3** could be further elevated to enantiomerically pure level *via* recrystallization from Hexane/DCM.

**General procedure B:** A sealed tube equipped with a stir bar under argon atmosphere was charged with **3** (>99% ee, 4.0 mmol) and <sup>t</sup>BuOK (1.2 equiv). THF (40.0 mL) was added as solvent and then the vial was capped. The reaction mixture was stirred at 80 °C for 20-36 h. After completion of the reaction (monitored by TLC), the mixture was concentrated in vacuum and the residue was purified by flash column chromatography on silica gel with CH<sub>3</sub>OH/ethyl acetate as eluent to afford the adduct **4** and **4'** as a pair of diastereomers.<sup>[1]</sup>

**General procedure C:** To a solution of **4** (2.0 mmol, 1 equiv), triethylamine (20.0 mmol, 10 equiv) in toluene (20 mL) at rt was added trichlorosilane (10.0 mmol, 5 equiv). The mixture was heated to 80 °C and stirred under nitrogen for 12 h. To the mixture at 0 °C was added BH<sub>3</sub>·THF complex (1.0 M, 26.0 mmol), and the resulting mixture was stirred at rt for about 2 h. Water (30.0 mL) was then added and the aqueous layer was extracted three times with ethyl acetate. The combined organic extracts were dried over Na<sub>2</sub>SO<sub>4</sub> and removed in vacuo and the residue was purified by flash column chromatography on silica gel using hexanes/ethyl acetate as eluent to provide the title phosphine borane adducts **5**.<sup>[2]</sup>

Date of product **3a**、**4a**、**4a'** was matched of the reported literature.<sup>[1]</sup>

### 3.1 (*R,E*)-(2-bromostyryl)(*tert*-butyl)(*o*-tolyl)phosphine oxide (**3b**)

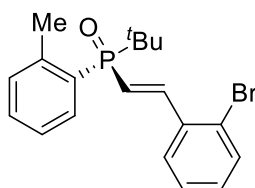

Prepared according to general procedure A from **2b** (8.0 mmol), racemic SPO **1** (15.2 mmol), after a flash column chromatography (hexanes: EA = 1:1) afforded the product **3b**. After recrystallization from Hexane/DCM, product **3b** could be obtained as a colorless solid (1.68 g, 56% yield) with 99% *ee*. M.p.: 170.1-171.9 °C. <sup>1</sup>H NMR (400 MHz, CDCl<sub>3</sub>) δ 8.03-7.95 (m, 1H), 7.67-7.60 (m, 2H), 7.59-7.54 (m, 1H), 7.45-7.32 (m, 2H), 7.32-7.18 (m, 3H), 7.01 (dd, *J* = 23.7, 17.1 Hz, 1H), 2.83 (s, 3H), 1.22 (d, *J* = 15.0 Hz, 9H); <sup>13</sup>C NMR (101 MHz, CDCl<sub>3</sub>) δ 147.2 (d, *J*<sub>C-P</sub> = 3.7 Hz), 144.0 (d, *J*<sub>C-P</sub> = 7.2 Hz), 136.1 (d, *J*<sub>C-P</sub> = 16.0 Hz), 133.4, 132.9 (d, *J*<sub>C-P</sub> = 10.5 Hz), 132.5 (d, *J*<sub>C-P</sub> = 10.8 Hz), 131.2 (d, *J*<sub>C-P</sub> = 2.6 Hz), 130.5, 128.9, 130.0, 127.5, 124.7 (d, *J*<sub>C-P</sub> = 11.4 Hz), 124.5, 121.2 (d, *J*<sub>C-P</sub> = 90.9 Hz), 34.4 (d, *J*<sub>C-P</sub> = 72.6 Hz), 24.6, 22.2 (d, *J*<sub>C-P</sub> = 2.2 Hz); <sup>31</sup>P NMR (162 MHz, CDCl<sub>3</sub>) δ 41.8. HRMS (EI): *m/z*: [M]<sup>+</sup> Calcd for C<sub>19</sub>H<sub>22</sub>BrOP: 376.0592, found 376.0589. HPLC (AD-H, 2-propanol /n-hexane = 5/95, flow rate = 1.0 mL/min, λ = 254 nm) t<sub>R</sub> = 15.4 min (major), 12.6 min (minor). [α]<sub>D</sub><sup>20</sup> = 54.8 (*c* = 0.5, CHCl<sub>3</sub>).

<Chromatogram>

mAU

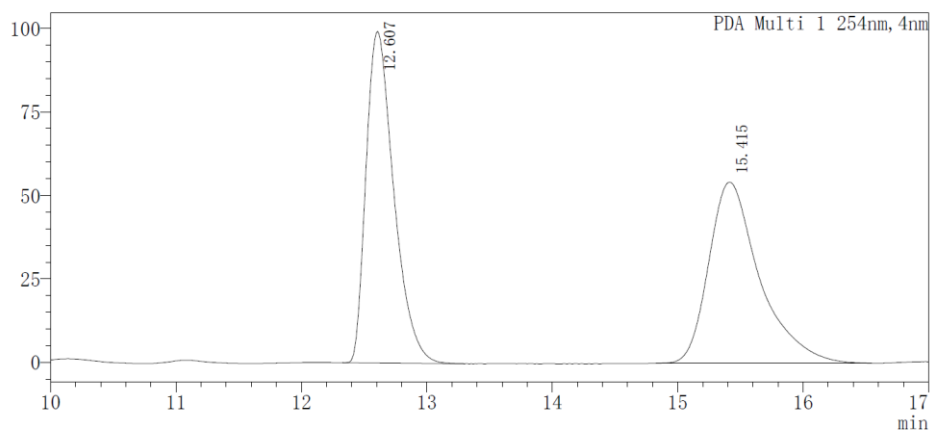

<Peak Table>

PDA Ch1 254nm

| No.   | Ret. Time (min) | Height (mAU) | Height% | Area (mAU*min) | Area%   |
|-------|-----------------|--------------|---------|----------------|---------|
| 1     | 12.607          | 99296        | 64.658  | 1529785        | 50.025  |
| 2     | 15.415          | 54274        | 35.342  | 1528248        | 49.975  |
| Total |                 | 153570       | 100.000 | 3058033        | 100.000 |

<Chromatogram>

mAU

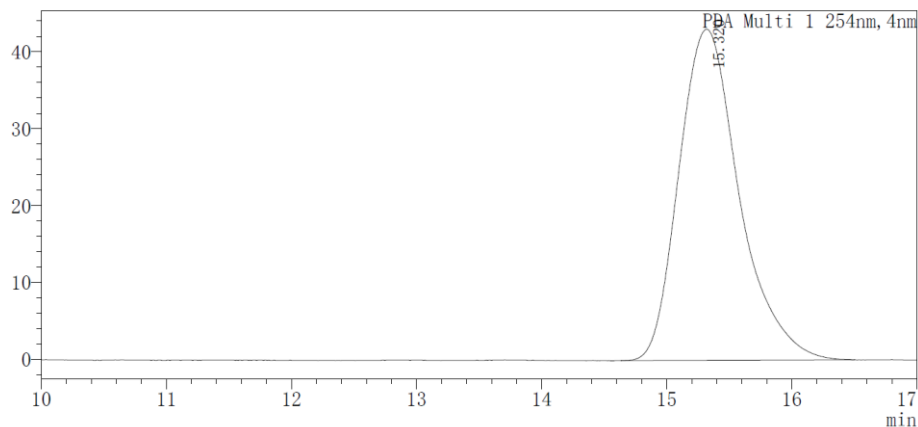

<Peak Table>

PDA Ch1 254nm

| No. | Ret. Time (min) | Height (mAU) | Height% | Area (mAU*min) | Area%   |
|-----|-----------------|--------------|---------|----------------|---------|
| 1   | 15.320          | 43039        | 100.000 | 1443016        | 100.000 |
| 总计  |                 | 43039        | 100.000 | 1443016        | 100.000 |

Total

### 3.2 (*R,E*)-tert-butyl(2-fluorostyryl)(*o*-tolyl)phosphine oxide (**3c**)

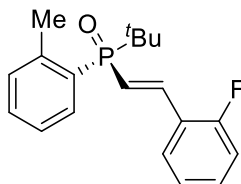

Prepared according to general procedure A from **2c** (8.0 mmol), racemic SPO **1** (15.2 mmol), after a flash column chromatography (hexanes: EA = 1:1) afforded the product

**3c.** After recrystallization from Hexane/DCM, product **3c** could be obtained as a colorless solid (1.29 g, 51% yield) with 99% *ee*. M.p.: 191.1-191.9 °C. **<sup>1</sup>H NMR** (400 MHz, CDCl<sub>3</sub>) δ 7.73 (t, *J* = 17.6 Hz, 1H), 7.60-7.51 (m, 2H), 7.42-7.31 (m, 2H), 7.29-7.20 (m, 3H), 7.19-7.15 (m, 1H), 7.12 (dd, *J* = 10.7, 8.7 Hz, 1H), 2.82 (s, 3H), 1.21 (d, *J* = 15.0 Hz, 9H); **<sup>13</sup>C NMR** (101 MHz, CDCl<sub>3</sub>) δ 161.2 (d, *J*<sub>C-F</sub> = 253.5 Hz), 143.8 (d, *J*<sub>C-P</sub> = 7.2 Hz), 141.7 (d, *J*<sub>C-P</sub> = 3.0 Hz), 133.0 (d, *J*<sub>C-P</sub> = 10.4 Hz), 132.4 (d, *J*<sub>C-P</sub> = 10.9 Hz), 131.1 (d, *J*<sub>C-P</sub> = 2.5 Hz), 130.9 (d, *J*<sub>C-P</sub> = 8.8 Hz), 130.0 (d, *J*<sub>C-F</sub> = 3.2 Hz), 128.8 (d, *J*<sub>C-P</sub> = 91.5 Hz), 124.7 (d, *J*<sub>C-P</sub> = 11.5 Hz), 124.3 (d, *J*<sub>C-F</sub> = 3.5 Hz), 121.4 (d, *J*<sub>C-F</sub> = 8.5 Hz), 120.5 (d, *J*<sub>C-F</sub> = 8.2 Hz), 116.2 (d, *J*<sub>C-F</sub> = 22.0 Hz), 34.3 (d, *J*<sub>C-P</sub> = 72.2 Hz), 24.5, 22.2 (d, *J*<sub>C-P</sub> = 2.3 Hz); **<sup>31</sup>P NMR** (162 MHz, CDCl<sub>3</sub>) δ 42.0; **<sup>19</sup>F NMR** (377 MHz, CDCl<sub>3</sub>) δ -115.4. **HRMS** (EI): *m/z*: [M]<sup>+</sup> Calcd for C<sub>19</sub>H<sub>22</sub>FOP: 316.1392, found 316.1386. HPLC (AD-H, 2-propanol /n-hexane = 5/95, flow rate = 1.0 mL/min, λ = 254 nm) tR = 18.3 min (major), 15.2 min (minor). [α]<sub>D</sub><sup>20</sup> = 138.2 (*c* = 0.5, CHCl<sub>3</sub>).

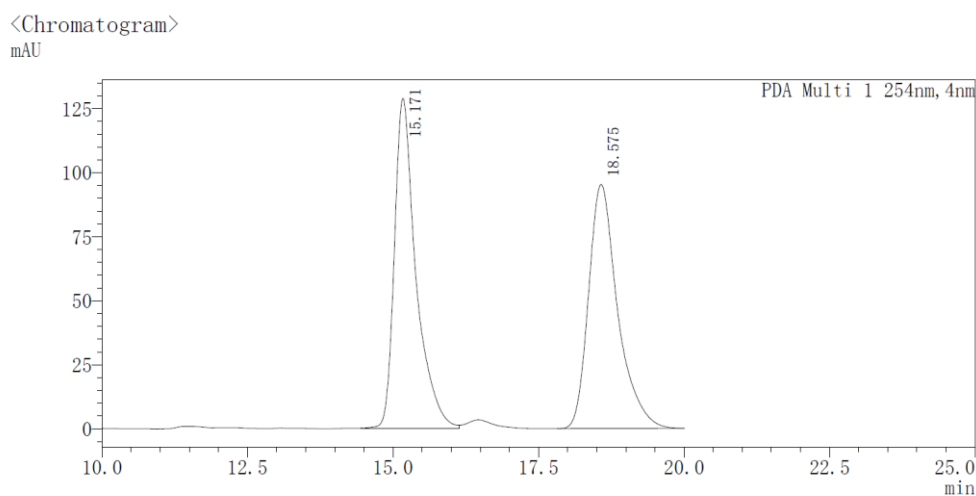

<Peak Table>

PDA Ch1 254nm

| No.   | Ret. Time (min) | Height (mAU) | Height% | Area (mAU*min) | Area%   |
|-------|-----------------|--------------|---------|----------------|---------|
| 1     | 15.171          | 128971       | 57.504  | 3328168        | 50.121  |
| 2     | 18.575          | 95309        | 42.496  | 3312109        | 49.879  |
| Total |                 | 224281       | 100.000 | 6640277        | 100.000 |



<Chromatogram>

mAU

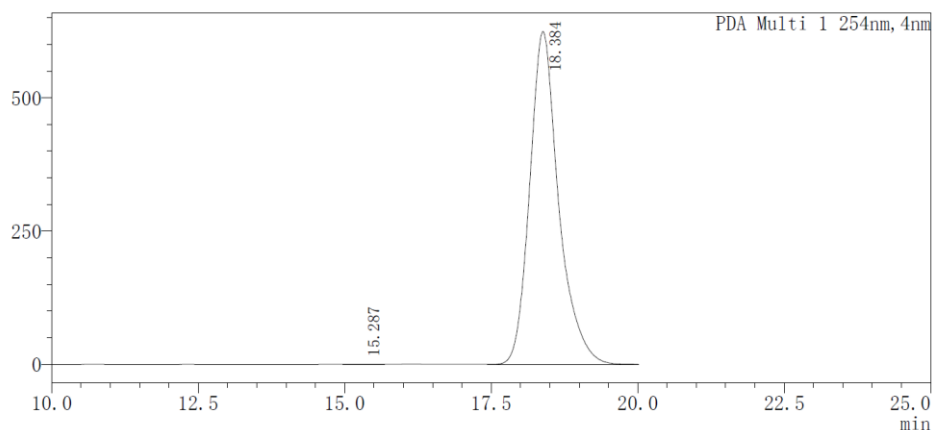

<Peak Table>

PDA Ch1 254nm

| No.   | Ret. Time (min) | Height (mAU) | Height% | Area (mAU*min) | Area%   |
|-------|-----------------|--------------|---------|----------------|---------|
| 1     | 15.287          | 350          | 0.056   | 10002          | 0.047   |
| 2     | 18.384          | 624120       | 99.944  | 21470515       | 99.953  |
| Total |                 | 624470       | 100.000 | 21480517       | 100.000 |

### 3.3 (*R,E*)-tert-butyl(3-chlorostyryl)(*o*-tolyl)phosphine oxide (**3d**)

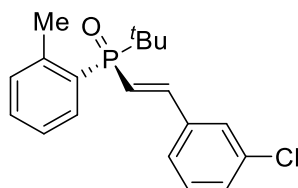

Prepared according to general procedure A from **2d** (8.0 mmol), racemic SPO **1** (15.2 mmol), after a flash column chromatography (hexanes: EA = 1:1) afforded the product **3d**. After recrystallization from Hexane/DCM, product **3d** could be obtained as a colorless solid (1.51 g, 57% yield) with 99% *ee*. M.p.: 160.0-160.9 °C. <sup>1</sup>H NMR (400 MHz, CDCl<sub>3</sub>) δ 7.68-7.49 (m, 3H), 7.39 (dd, *J* = 11.6, 5.0 Hz, 2H), 7.35-7.30 (m, 2H), 7.29-7.20 (m, 2H), 7.05 (dd, *J* = 23.6, 17.2 Hz, 1H), 2.80 (s, 3H), 1.19 (d, *J* = 15.1 Hz, 9H); <sup>13</sup>C NMR (101 MHz, CDCl<sub>3</sub>) δ 147.0 (d, *J*<sub>C-P</sub> = 2.9 Hz), 143.8 (d, *J*<sub>C-P</sub> = 7.1 Hz), 137.4 (d, *J*<sub>C-P</sub> = 16.1 Hz), 134.8, 133.0 (d, *J*<sub>C-P</sub> = 10.8 Hz), 132.5 (d, *J*<sub>C-P</sub> = 10.8 Hz), 131.3 (d, *J*<sub>C-P</sub> = 2.6 Hz), 130.1, 129.6, 129.0, 128.1, 127.0, 126.3, 124.8 (d, *J*<sub>C-P</sub> = 11.6 Hz), 34.5 (d, *J*<sub>C-P</sub> = 72.7 Hz), 24.5, 22.2 (d, *J*<sub>C-P</sub> = 2.2 Hz); <sup>31</sup>P NMR (162 MHz, CDCl<sub>3</sub>) δ 42.3-41.9 (m). HRMS (EI): *m/z*: [M]<sup>+</sup> Calcd for C<sub>19</sub>H<sub>22</sub>ClOP: 332.1097, found 332.1092. HPLC (IC, 2-propanol /n-hexane = 20/80, flow rate = 1.0 mL/min, λ = 254 nm) tR = 7.9 min (major), 10.3 min (minor). [α]<sub>D</sub><sup>20</sup> = 169.5 (*c* = 0.2, CHCl<sub>3</sub>).

<Chromatogram>

mAU

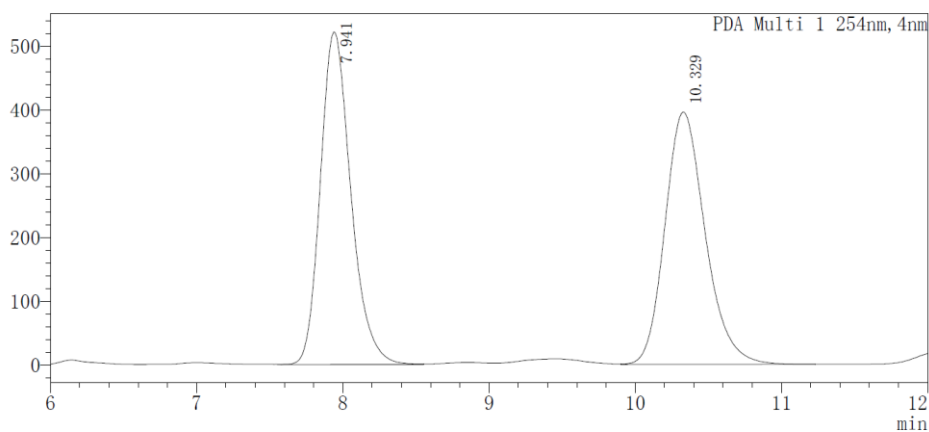

<Peak Table>

PDA Ch1 254nm

| No.   | Ret. Time (min) | Height (mAU) | Height% | Area (mAU*min) | Area%   |
|-------|-----------------|--------------|---------|----------------|---------|
| 1     | 7.941           | 521342       | 56.855  | 7566935        | 49.969  |
| 2     | 10.329          | 395618       | 43.145  | 7576405        | 50.031  |
| Total |                 | 916960       | 100.000 | 15143340       | 100.000 |

<Chromatogram>

mAU

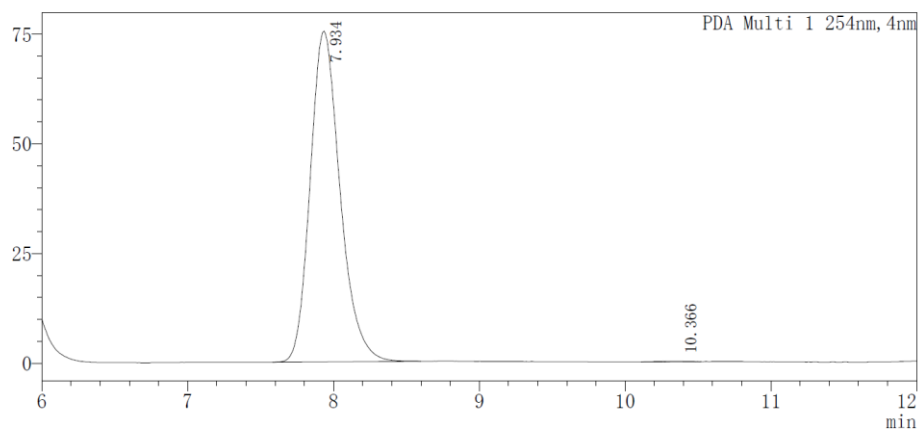

<Peak Table>

PDA Ch1 254nm

| No.   | Ret. Time (min) | Height (mAU) | Height% | Area (mAU*min) | Area%   |
|-------|-----------------|--------------|---------|----------------|---------|
| 1     | 7.934           | 75372        | 99.828  | 1074850        | 99.836  |
| 2     | 10.366          | 130          | 0.172   | 1764           | 0.164   |
| Total |                 | 75501        | 100.000 | 1076614        | 100.000 |

### 3.4 (*R,E*)-*tert*-butyl(3-methylstyryl)(*o*-tolyl)phosphine oxide (**3e**)

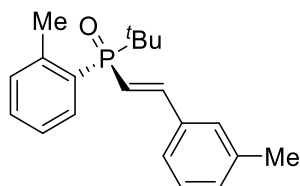

Prepared according to general procedure A from **2e** (8.0 mmol), racemic SPO **1** (15.2 mmol), after a flash column chromatography (hexanes: EA = 1:1) afforded the product

**3e.** After recrystallization from Hexane/DCM, product **3e** could be obtained as a colorless solid (1.50 g, 60% yield) with 99% *ee*. M.p.: 180.0-180.9 °C. **<sup>1</sup>H NMR** (400 MHz, CDCl<sub>3</sub>) δ 7.66 (t, *J* = 17.2 Hz, 1H), 7.57 (dd, *J* = 11.5, 7.9 Hz, 1H), 7.43-7.34 (m, 3H), 7.30-7.25 (m, 4H), 7.01 (dd, *J* = 24.4, 17.2 Hz, 1H), 2.82 (s, 3H), 2.39 (s, 3H), 1.20 (d, *J* = 15.0 Hz, 9H); **<sup>13</sup>C NMR** (101 MHz, CDCl<sub>3</sub>) δ 148.6 (d, *J*<sub>C-P</sub> = 2.5 Hz), 143.7 (d, *J*<sub>C-P</sub> = 7.0 Hz), 138.4, 135.5 (d, *J*<sub>C-P</sub> = 15.9 Hz), 133.0 (d, *J*<sub>C-P</sub> = 10.6 Hz), 132.3 (d, *J*<sub>C-P</sub> = 10.7 Hz), 131.0 (d, *J*<sub>C-P</sub> = 2.7 Hz), 130.5, 128.9 (d, *J*<sub>C-P</sub> = 91.1 Hz), 128.6, 128.0, 124.9, 124.6 (d, *J*<sub>C-P</sub> = 11.4 Hz), 116.5 (d, *J*<sub>C-P</sub> = 93.6 Hz), 34.3 (d, *J*<sub>C-P</sub> = 72.7 Hz), 24.5, 22.2 (d, *J*<sub>C-P</sub> = 2.2 Hz), 21.3; **<sup>31</sup>P NMR** (162 MHz, CDCl<sub>3</sub>) δ 42.5-42.1 (m). **HRMS** (EI): *m/z*: [M]<sup>+</sup> Calcd for C<sub>20</sub>H<sub>25</sub>OP: 312.1643, found 312.1638. HPLC (IC, 2-propanol /n-hexane = 25/75, flow rate = 1.0 mL/min, λ = 254 nm) t<sub>R</sub> = 7.4 min (major), 9.7 min (minor). [α]<sub>D</sub><sup>20</sup> = 154.5 (*c* = 0.5, CHCl<sub>3</sub>).

<Chromatogram>  
mAU

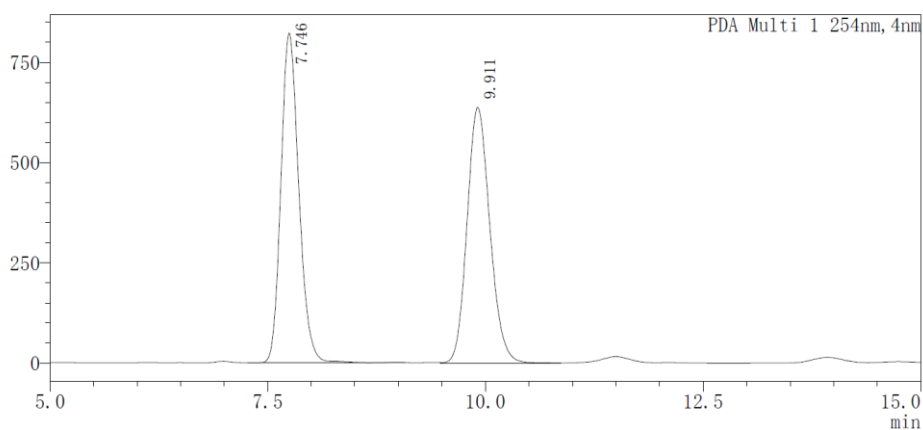

<Peak Table>  
PDA Ch1 254nm

| No.   | Ret. Time (min) | Height (mAU) | Height% | Area (mAU*min) | Area%   |
|-------|-----------------|--------------|---------|----------------|---------|
| 1     | 7.746           | 821920       | 56.295  | 11740361       | 50.237  |
| 2     | 9.911           | 638115       | 43.705  | 11629614       | 49.763  |
| Total |                 | 1460035      | 100.000 | 23369975       | 100.000 |

<Chromatogram>  
mAU

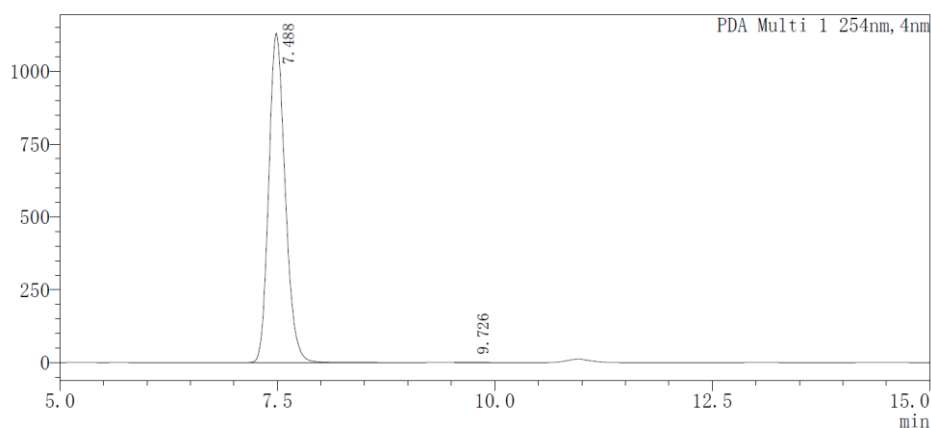

<Peak Table>

PDA Ch1 254nm

| No.   | Ret. Time (min) | Height (mAU) | Height% | Area (mAU*min) | Area%   |
|-------|-----------------|--------------|---------|----------------|---------|
| 1     | 7.488           | 1130402      | 99.935  | 14862908       | 99.919  |
| 2     | 9.726           | 738          | 0.065   | 12073          | 0.081   |
| Total |                 | 1131140      | 100.000 | 14874982       | 100.000 |

### 3.5 (*R,E*)-2-([1,1'-biphenyl]-4-yl)vinyl(*tert*-butyl)(*o*-tolyl)phosphine oxide (**3f**)

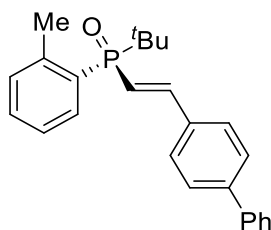

Prepared according to general procedure A from **2f** (8.0 mmol), racemic SPO **1** (15.2 mmol), after a flash column chromatography (hexanes: EA = 1:1) afforded the product **3f**. After recrystallization from Hexane/DCM, product **3f** could be obtained as a yellow solid (1.41 g, 47% yield) with 99% *ee*. M.p.: 145.0-145.9 °C. <sup>1</sup>H NMR (400 MHz, CDCl<sub>3</sub>) δ 7.75 (t, *J* = 17.2 Hz, 1H), 7.70-7.54 (m, 7H), 7.47 (t, *J* = 7.4 Hz, 2H), 7.39 (d, *J* = 6.3 Hz, 2H), 7.33-7.21 (m, 2H), 7.09 (dd, *J* = 24.2, 17.2 Hz, 1H), 2.84 (s, 3H), 1.23 (d, *J* = 15.0 Hz, 9H); <sup>13</sup>C NMR (101 MHz, CDCl<sub>3</sub>) δ 148.0 (d, *J*<sub>C-P</sub> = 2.7 Hz), 143.7 (d, *J*<sub>C-P</sub> = 7.1 Hz), 142.4, 140.2, 134.5 (d, *J*<sub>C-P</sub> = 16.1 Hz), 133.0 (d, *J*<sub>C-P</sub> = 10.7 Hz), 132.4 (d, *J*<sub>C-P</sub> = 10.7 Hz), 131.1 (d, *J*<sub>C-P</sub> = 2.5 Hz), 128.8 (d, *J*<sub>C-P</sub> = 91.4 Hz), 128.8, 128.0, 127.7, 127.4, 127.0, 124.7 (d, *J*<sub>C-P</sub> = 11.5 Hz), 116.7 (d, *J*<sub>C-P</sub> = 93.4 Hz), 34.4 (d, *J*<sub>C-P</sub> = 72.7 Hz), 24.5, 22.2 (d, *J*<sub>C-P</sub> = 2.1 Hz); <sup>31</sup>P NMR (162 MHz, CDCl<sub>3</sub>) δ 42.9-42.1 (m). HRMS (EI): *m/z*: [M]<sup>+</sup> Calcd for C<sub>25</sub>H<sub>27</sub>OP: 374.1800, found 374.1794. HPLC (AD-H, 2-propanol /*n*-hexane = 15/85, flow rate = 1.0 mL/min, λ = 254 nm) t<sub>R</sub> = 14.0 min

(major), 18.3 min (minor).  $[\alpha]_D^{20} = 187.8$  ( $c = 0.5$ ,  $\text{CHCl}_3$ ).

<Chromatogram>

mAU

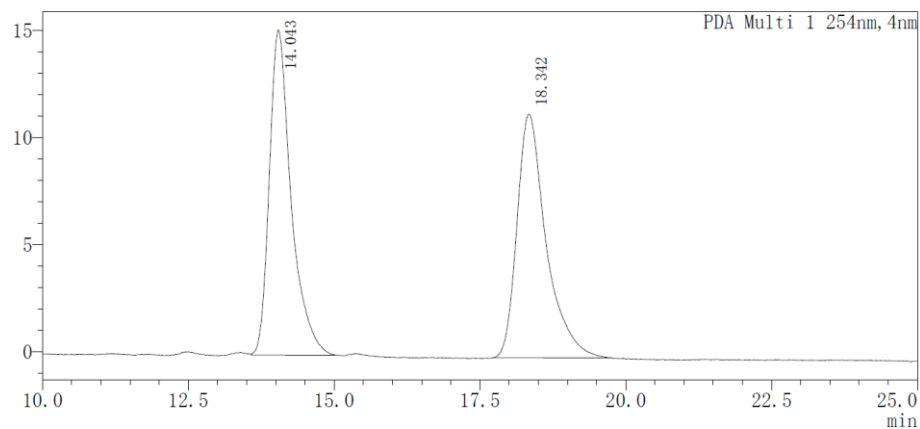

<Peak Table>

PDA Ch1 254nm

| No.   | Ret. Time (min) | Height (mAU) | Height% | Area (mAU*min) | Area%   |
|-------|-----------------|--------------|---------|----------------|---------|
| 1     | 14.043          | 15160        | 57.143  | 394566         | 49.990  |
| 2     | 18.342          | 11370        | 42.857  | 394729         | 50.010  |
| Total |                 | 26530        | 100.000 | 789295         | 100.000 |

<Chromatogram>

mAU

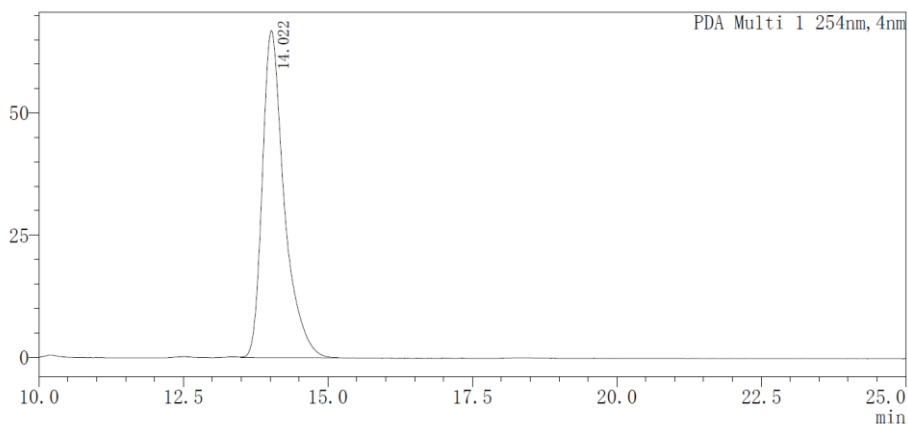

<Peak Table>

PDA Ch1 254nm

| No. | Ret. Time (min) | Height (mAU) | Height% | Area (mAU*min) | Area%   |
|-----|-----------------|--------------|---------|----------------|---------|
| 1   | 14.022          | 66996        | 100.000 | 1768878        | 100.000 |
| 总计  |                 | 66996        | 100.000 | 1768878        | 100.000 |

Total

### 3.6 (*R,E*)-tert-butyl(*o*-tolyl)(4-(trifluoromethyl)styryl)phosphine oxide (3g)

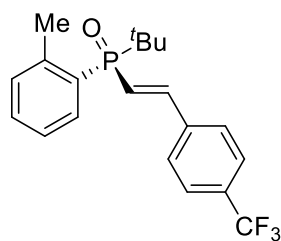

Prepared according to general procedure A from **2g** (8.0 mmol), racemic SPO **1** (15.2 mmol), after a flash column chromatography (hexanes: EA = 1:1) afforded the product **3g**. After recrystallization from Hexane/DCM, product **3g** could be obtained as a colorless solid (1.26 g, 43% yield) with 99% *ee*. M.p.: 156.0-156.9 °C. <sup>1</sup>H NMR (400 MHz, CDCl<sub>3</sub>) δ 7.75 (d, *J* = 17.0 Hz, 1H), 7.67 (s, 4H), 7.55 (dd, *J* = 11.5, 7.9 Hz, 1H), 7.40 (t, *J* = 7.4 Hz, 1H), 7.29-7.23 (m, 2H), 7.16 (dd, *J* = 23.5, 17.2 Hz, 1H), 2.82 (s, 3H), 1.21 (d, *J* = 15.1 Hz, 9H); <sup>13</sup>C NMR (101 MHz, CDCl<sub>3</sub>) δ 146.9 (d, *J*<sub>C-P</sub> = 2.8 Hz), 143.9 (d, *J*<sub>C-P</sub> = 7.3 Hz), 138.9 (d, *J*<sub>C-F</sub> = 15.9 Hz), 132.7 (d, *J*<sub>C-P</sub> = 10.8 Hz), 132.6 (d, *J*<sub>C-P</sub> = 10.5 Hz), 131.3 (d, *J*<sub>C-F</sub> = 32.3 Hz), 131.3 (d, *J*<sub>C-P</sub> = 2.8 Hz), 128.4 (d, *J*<sub>C-P</sub> = 91.8 Hz), 127.8, 126.2 (q, *J*<sub>C-F</sub> = 272.7 Hz), 125.8 (q, *J*<sub>C-P</sub> = 3.8 Hz), 124.8 (d, *J*<sub>C-F</sub> = 11.3 Hz), 120.3 (d, *J*<sub>C-P</sub> = 90.7 Hz), 34.4 (d, *J*<sub>C-P</sub> = 72.6 Hz), 24.5, 22.2 (d, *J*<sub>C-P</sub> = 2.5 Hz); <sup>31</sup>P NMR (162 MHz, C<sub>6</sub>D<sub>6</sub>) δ 41.8; <sup>19</sup>F NMR (377 MHz, CDCl<sub>3</sub>) δ -62.8. HRMS (EI): *m/z*: [M]<sup>+</sup> Calcd for C<sub>20</sub>H<sub>22</sub>F<sub>3</sub>OP: 366.1360, found 366.1355. HPLC (AD-H, 2-propanol/n-hexane = 15/85, flow rate = 1.0 mL/min, λ = 254 nm) t<sub>R</sub> = 9.0 min (major), 11.2 min (minor). [α]<sub>D</sub><sup>20</sup> = 138.3 (*c* = 0.5, CHCl<sub>3</sub>).

<Chromatogram>  
mAU

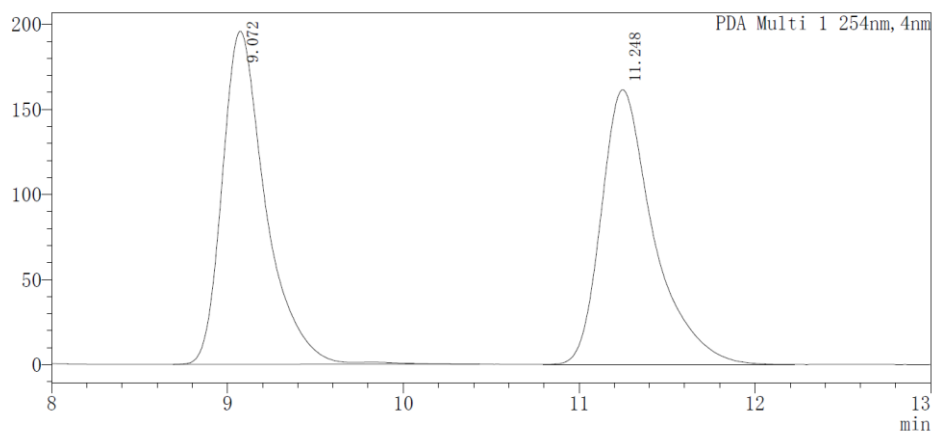

<Peak Table>

PDA Ch1 254nm

| No.   | Ret. Time (min) | Height (mAU) | Height% | Area (mAU*min) | Area%   |
|-------|-----------------|--------------|---------|----------------|---------|
| 1     | 9.072           | 195609       | 54.806  | 3365819        | 50.227  |
| 2     | 11.248          | 161305       | 45.194  | 3335350        | 49.773  |
| Total |                 | 356913       | 100.000 | 6701169        | 100.000 |

<Chromatogram>  
mAU

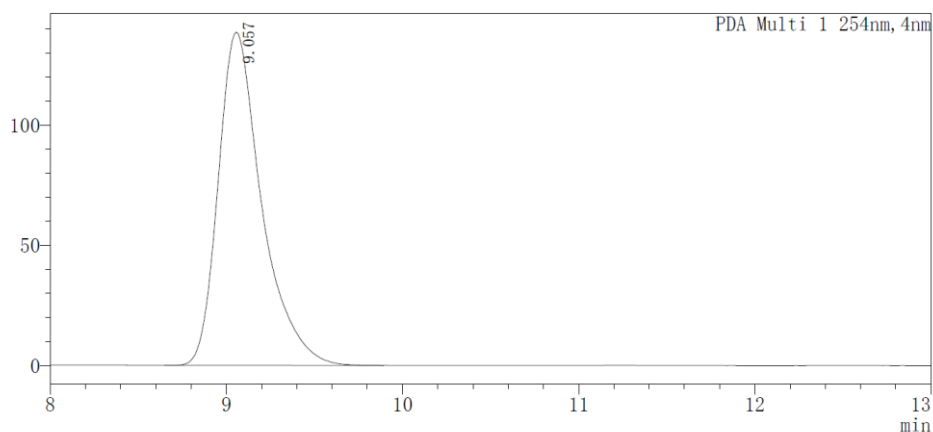

<Peak Table>

PDA Ch1 254nm

| No. | Ret. Time (min) | Height (mAU) | Height% | Area (mAU*min) | Area%   |
|-----|-----------------|--------------|---------|----------------|---------|
| 1   | 9.057           | 138617       | 100.000 | 2380090        | 100.000 |
| 总计  |                 | 138617       | 100.000 | 2380090        | 100.000 |

Total

### 3.7 (*R,E*)-tert-butyl(4-methoxystyryl)(o-tolyl)phosphine oxide (**3h**)

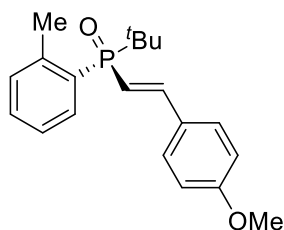

Prepared according to general procedure A from **2h** (8.0 mmol), racemic SPO **1** (15.2 mmol), after a flash column chromatography (hexanes: EA = 1:1) afforded the product **3h**. After recrystallization from Hexane/DCM, product **3h** could be obtained as a colorless solid (1.50 g, 57% yield) with 99% *ee*. M.p.: 127.0-127.9 °C. <sup>1</sup>H NMR (400 MHz, CDCl<sub>3</sub>) δ 7.72-7.47 (m, 4H), 7.38 (tt, *J* = 7.5, 1.5 Hz, 1H), 7.31-7.19 (m, 2H), 6.99-6.75 (m, 3H), 3.85 (s, 3H), 2.81 (s, 3H), 1.20 (d, *J* = 14.9 Hz, 9H); <sup>13</sup>C NMR (101 MHz, CDCl<sub>3</sub>) δ 160.9, 148.0 (d, *J*<sub>C-P</sub> = 2.9 Hz), 143.7 (d, *J*<sub>C-P</sub> = 7.2 Hz), 133.1 (d, *J*<sub>C-P</sub> = 10.4 Hz), 132.4 (d, *J*<sub>C-P</sub> = 10.3 Hz), 131.0 (d, *J*<sub>C-P</sub> = 2.7 Hz), 129.7, 129.17, 128.6 (d, *J*<sub>C-P</sub> = 16.1 Hz), 124.7 (d, *J*<sub>C-P</sub> = 11.4 Hz), 114.2, 113.8 (d, *J*<sub>C-P</sub> = 95.3 Hz), 55.4, 34.4 (d, *J*<sub>C-P</sub> = 72.7 Hz), 24.6, 22.3 (d, *J*<sub>C-P</sub> = 2.2 Hz); <sup>31</sup>P NMR (162 MHz, CDCl<sub>3</sub>) δ 42.9-42.4 (m). HRMS (EI): *m/z*: [M]<sup>+</sup> Calcd for C<sub>20</sub>H<sub>25</sub>O<sub>2</sub>P: 328.1592, found 328.1584. HPLC (AD-H, 2-propanol /n-hexane = 15/85, flow rate = 1.0 mL/min, λ = 254 nm) tR = 13.9 min (major), 16.8 min (minor). [α]<sub>D</sub><sup>20</sup> = 192.9 (*c* = 0.5, CHCl<sub>3</sub>).

<Chromatogram>

mAU

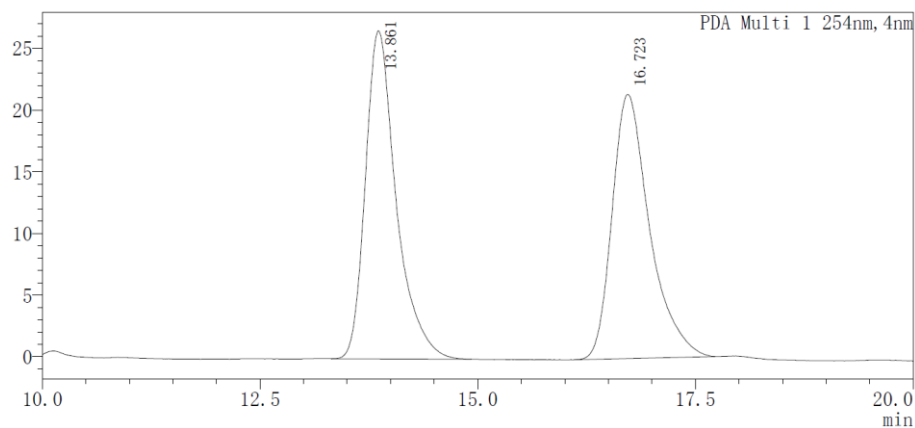

<Peak Table>

PDA Ch1 254nm

| No.   | Ret. Time (min) | Height (mAU) | Height% | Area (mAU*min) | Area%   |
|-------|-----------------|--------------|---------|----------------|---------|
| 1     | 13.861          | 26602        | 55.397  | 655434         | 50.545  |
| 2     | 16.723          | 21419        | 44.603  | 641295         | 49.455  |
| Total |                 | 48020        | 100.000 | 1296729        | 100.000 |

<Chromatogram>

mAU

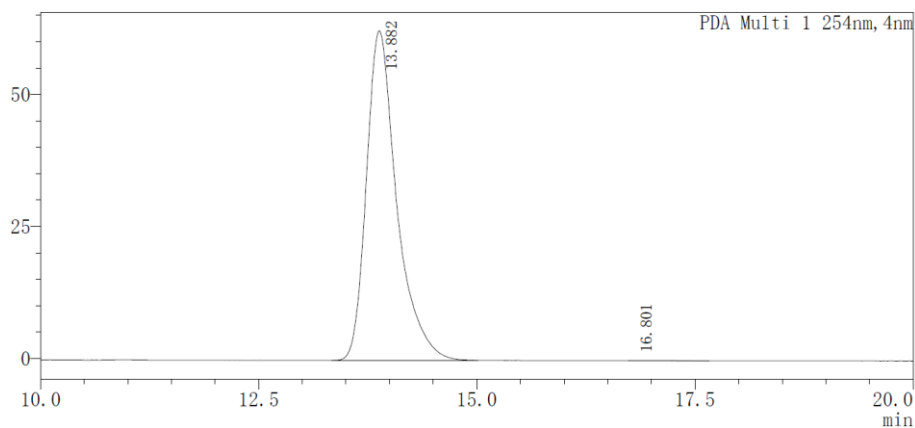

<Peak Table>

PDA Ch1 254nm

| No.   | Ret. Time (min) | Height (mAU) | Height% | Area (mAU*min) | Area%   |
|-------|-----------------|--------------|---------|----------------|---------|
| 1     | 13.882          | 62397        | 99.973  | 1510993        | 99.990  |
| 2     | 16.801          | 17           | 0.027   | 154            | 0.010   |
| Total |                 | 62414        | 100.000 | 1511147        | 100.000 |

### 3.8 (*R,E*)-*tert*-butyl(4-propylstyryl)(*o*-tolyl)phosphine oxide (**3i**)

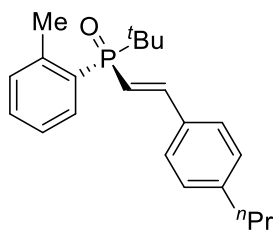

Prepared according to general procedure A from **2i** (8.0 mmol), racemic SPO **1** (15.2



mmol), after a flash column chromatography (hexanes: EA = 1:1) afforded the product **3i**. After recrystallization from Hexane/DCM, product **3i** could be obtained as a colorless solid (1.22 g, 45% yield) with 99% *ee*. M.p.: 135.0-135.9 °C. <sup>1</sup>H NMR (400 MHz, CDCl<sub>3</sub>) δ 7.70-7.62 (m, 1H), 7.59-7.49 (m, 3H), 7.37-7.35 (m, 1H), 7.28-7.21 (m, 4H), 7.03-6.92 (m, 1H), 2.81 (s, 3H), 2.62 (t, *J* = 7.2 Hz, 2H), 1.66 (dd, *J* = 14.4, 7.1 Hz, 2H), 1.20 (d, *J* = 14.9 Hz, 9H), 0.96 (t, *J* = 7.0 Hz, 3H); <sup>13</sup>C NMR (101 MHz, CDCl<sub>3</sub>) δ 148.5 (d, *J*<sub>C-P</sub> = 2.3 Hz), 144.8, 143.8 (d, *J*<sub>C-P</sub> = 7.0 Hz), 133.3, 133.1 (d, *J*<sub>C-P</sub> = 10.7 Hz), 132.4 (d, *J*<sub>C-P</sub> = 10.6 Hz), 131.1 (d, *J*<sub>C-P</sub> = 2.5 Hz), 129.1 (d, *J*<sub>C-P</sub> = 91.3 Hz), 129.0, 127.6, 124.7 (d, *J*<sub>C-P</sub> = 11.4 Hz), 115.5 (d, *J*<sub>C-P</sub> = 94.3 Hz), 37.9, 34.4 (d, *J*<sub>C-P</sub> = 72.7 Hz), 24.6, 24.4, 22.3, 13.8; <sup>31</sup>P NMR (162 MHz, CDCl<sub>3</sub>) δ 42.5 (s). HRMS (EI): *m/z*: [M]<sup>+</sup> Calcd for C<sub>22</sub>H<sub>29</sub>OP: 340.1956, found 340.1950. HPLC (AD-H, 2-propanol /*n*-hexane = 20/80, flow rate = 1.0 mL/min, λ = 254 nm) tR = 8.3 min (major), 10.7 min (minor). [α]<sub>D</sub><sup>20</sup> = 165.6 (*c* = 0.5, CHCl<sub>3</sub>).

<Chromatogram>  
mAU

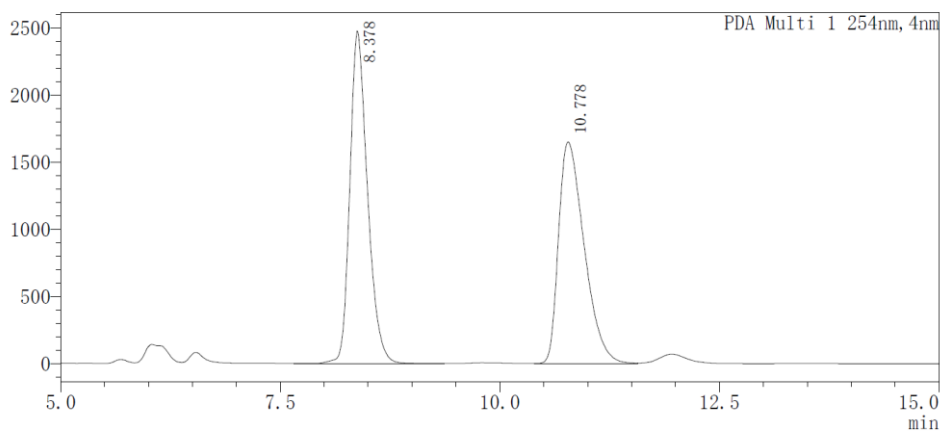

<Peak Table>

PDA Ch1 254nm

| No.   | Ret. Time (min) | Height (mAU) | Height% | Area (mAU*min) | Area%   |
|-------|-----------------|--------------|---------|----------------|---------|
| 1     | 8.378           | 2474725      | 59.989  | 34499116       | 50.754  |
| 2     | 10.778          | 1650567      | 40.011  | 33474176       | 49.246  |
| Total |                 | 4125292      | 100.000 | 67973292       | 100.000 |

<Chromatogram>  
mAU

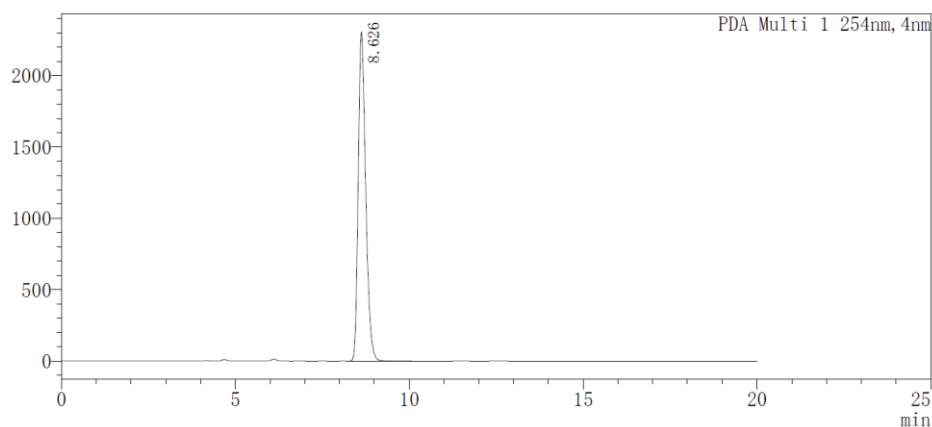

<Peak Table>

PDA Ch1 254nm

| No. | Ret. Time (min) | Height (mAU) | Height% | Area (mAU*min) | Area%   |
|-----|-----------------|--------------|---------|----------------|---------|
| 1   | 8.626           | 2304455      | 100.000 | 34357769       | 100.000 |
| 总计  |                 | 2304455      | 100.000 | 34357769       | 100.000 |

Total

### 3.9 (*R,E*)-tert-butyl(3,5-di-tert-butylstyryl)(*o*-tolyl)phosphine oxide (**3j**)

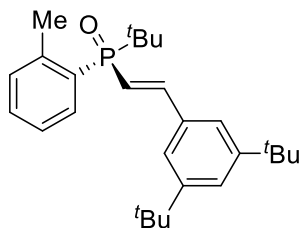

Prepared according to general procedure A from **2j** (8.0 mmol), racemic SPO **1** (15.2 mmol), after a flash column chromatography (hexanes: EA = 1:1) afforded the product **3j**. After recrystallization from Hexane/DCM, product **3j** could be obtained as a colorless solid (2.10 g, 64% yield) with 99% *ee*. M.p.: 138.0-138.9 °C. <sup>1</sup>H NMR (400 MHz, CDCl<sub>3</sub>) δ 7.71 (t, *J* = 17.3 Hz, 1H), 7.58 (ddd, *J* = 11.8, 7.8, 1.4 Hz, 1H), 7.47 (t, *J* = 1.8 Hz, 1H), 7.44-7.37 (m, 3H), 7.28 (q, *J* = 6.0 Hz, 2H), 7.10-6.80 (m, 1H), 2.95-2.71 (m, 3H), 1.37 (s, 18H), 1.22 (d, *J* = 14.9 Hz, 9H); <sup>13</sup>C NMR (101 MHz, CDCl<sub>3</sub>) δ 151.3, 149.7 (d, *J*<sub>C-P</sub> = 2.8 Hz), 143.8 (d, *J*<sub>C-P</sub> = 7.1 Hz), 134.9 (d, *J*<sub>C-P</sub> = 15.5 Hz), 133.1 (d, *J*<sub>C-P</sub> = 10.9 Hz), 132.4 (d, *J*<sub>C-P</sub> = 10.4 Hz), 131.1 (d, *J*<sub>C-P</sub> = 2.8 Hz), 129.1 (d, *J*<sub>C-P</sub> = 91.3 Hz), 124.8, 124.2, 122.0, 115.6 (d, *J*<sub>C-P</sub> = 93.8 Hz), 34.9, 34.4 (d, *J*<sub>C-P</sub> = 72.7 Hz), 31.4, 24.6, 22.3 (d, *J*<sub>C-P</sub> = 2.4 Hz); <sup>31</sup>P NMR (162 MHz, CDCl<sub>3</sub>) δ 42.72. HRMS (EI): *m/z*: [M]<sup>+</sup> Calcd for C<sub>27</sub>H<sub>39</sub>OP: 410.2739, found 410.2732. HPLC (IC, 2-propanol /n-hexane = 20/80, flow rate = 1.0 mL/min, λ = 254 nm) t<sub>R</sub> = 6.1 min (major), 6.9 min

(minor).  $[\alpha]_D^{20} = 118.1$  ( $c = 0.5$ ,  $\text{CHCl}_3$ ).

<Chromatogram>  
mAU

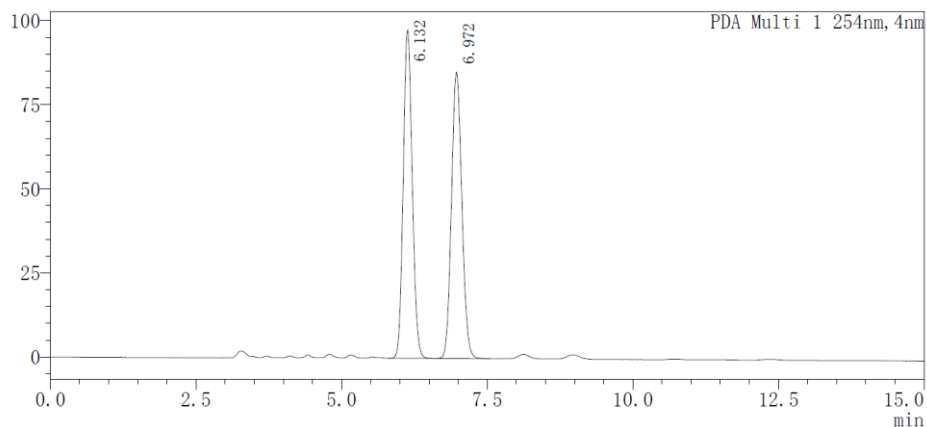

<Peak Table>

PDA Ch1 254nm

| No.   | Ret. Time (min) | Height (mAU) | Height% | Area (mAU*min) | Area%   |
|-------|-----------------|--------------|---------|----------------|---------|
| 1     | 6.132           | 97582        | 53.423  | 1050904        | 49.842  |
| 2     | 6.972           | 85078        | 46.577  | 1057570        | 50.158  |
| Total |                 | 182660       | 100.000 | 2108474        | 100.000 |

<Chromatogram>  
mAU

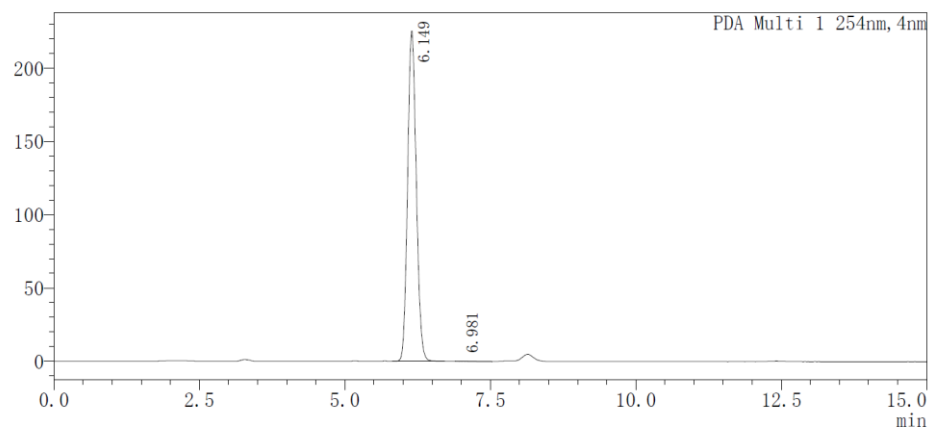

<Peak Table>

PDA Ch1 254nm

| No.   | Ret. Time (min) | Height (mAU) | Height% | Area (mAU*min) | Area%   |
|-------|-----------------|--------------|---------|----------------|---------|
| 1     | 6.149           | 225383       | 99.995  | 2343158        | 99.999  |
| 2     | 6.981           | 11           | 0.005   | 21             | 0.001   |
| Total |                 | 225394       | 100.000 | 2343179        | 100.000 |

### 3.10 (*R,E*)-*tert*-butyl(2-(naphthalen-2-yl)vinyl)(*o*-tolyl)phosphine oxide (3k)

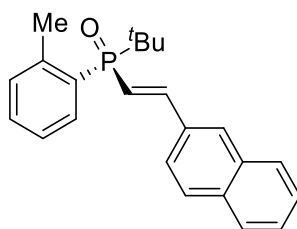

Prepared according to general procedure A from **2k** (8.0 mmol), racemic SPO **1** (15.2 mmol), after a flash column chromatography (hexanes: EA = 1:1) afforded the product **3k**. After recrystallization from Hexane/DCM, product **3k** could be obtained as a yellow solid (1.53 g, 55% yield) with 99% *ee*. M.p.: 164.0-164.9 °C. <sup>1</sup>H NMR (400 MHz, CDCl<sub>3</sub>) δ 7.96 (s, 1H), 7.92-7.80 (m, 4H), 7.76 (d, *J* = 8.5 Hz, 1H), 7.62 (dd, *J* = 11.5, 7.9 Hz, 1H), 7.52 (dd, *J* = 5.6, 2.7 Hz, 2H), 7.40 (t, *J* = 7.4 Hz, 1H), 7.34-7.23 (m, 2H), 7.15 (dd, *J* = 24.1, 17.2 Hz, 1H), 2.85 (s, 3H), 1.24 (d, *J* = 15.0 Hz, 9H); <sup>13</sup>C NMR (101 MHz, CDCl<sub>3</sub>) <sup>13</sup>C NMR (101 MHz, CDCl<sub>3</sub>) δ 148.6 (d, *J*<sub>C-P</sub> = 2.6 Hz), 143.9 (d, *J*<sub>C-P</sub> = 7.1 Hz), 134.0, 133.4, 133.2, 133.1, 133.0, 132.5 (d, *J*<sub>C-P</sub> = 10.6 Hz), 131.2 (d, *J*<sub>C-P</sub> = 2.6 Hz), 129.4, 129.0, 128.6 (d, *J*<sub>C-P</sub> = 4.4 Hz), 127.7, 126.8 (d, *J*<sub>C-P</sub> = 32.7 Hz), 126.3, 124.8 (d, *J*<sub>C-P</sub> = 11.5 Hz), 123.6, 117.1 (d, *J*<sub>C-P</sub> = 93.3 Hz), 34.5 (d, *J*<sub>C-P</sub> = 72.8 Hz), 24.6, 22.3 (d, *J*<sub>C-P</sub> = 2.2 Hz); <sup>31</sup>P NMR (162 MHz, CDCl<sub>3</sub>) δ 42.5-42.1 (m). HRMS (EI): *m/z*: [M]<sup>+</sup> Calcd for C<sub>23</sub>H<sub>25</sub>OP: 348.1643, found 348.1641. HPLC (IC, 2-propanol /n-hexane = 20/80, flow rate = 1.0 mL/min, λ = 254 nm) tR = 11.0 min (major), 13.3 min (minor). [α]<sub>D</sub><sup>20</sup> = 166.9 (*c* = 0.5, CHCl<sub>3</sub>).

<Chromatogram>  
mAU

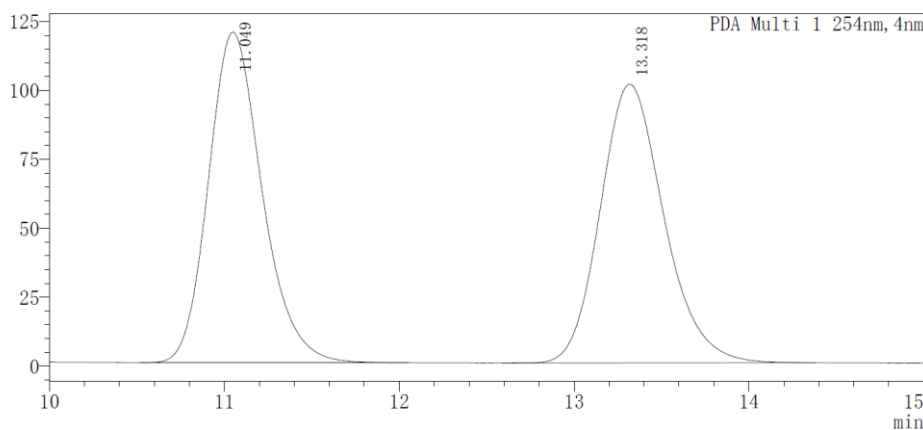

<Peak Table>

PDA Ch1 254nm

| No.   | Ret. Time (min) | Height (mAU) | Height% | Area (mAU*min) | Area%   |
|-------|-----------------|--------------|---------|----------------|---------|
| 1     | 11.049          | 120025       | 54.263  | 2561754        | 49.969  |
| 2     | 13.318          | 101168       | 45.737  | 2564912        | 50.031  |
| Total |                 | 221193       | 100.000 | 5126667        | 100.000 |

<Chromatogram>  
mAU

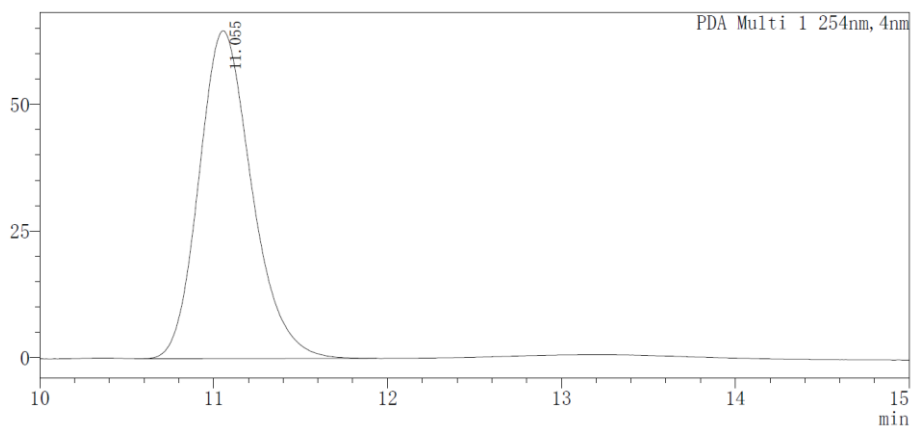

<Peak Table>

PDA Ch1 254nm

| No. | Ret. Time (min) | Height (mAU) | Height% | Area (mAU*min) | Area%   |
|-----|-----------------|--------------|---------|----------------|---------|
| 1   | 11.055          | 64713        | 100.000 | 1369659        | 100.000 |
| 总计  |                 | 64713        | 100.000 | 1369659        | 100.000 |

Total

### 3.11 (*R,E*)-tert-butyl(2-(thiophen-2-yl)vinyl)(*o*-tolyl)phosphine oxide (**3I**)

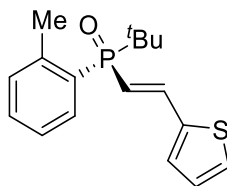

Prepared according to general procedure A from **2I** (8.0 mmol), racemic SPO **1** (15.2 mmol), after a flash column chromatography (hexanes: EA = 1:1) afforded the product **3I**. After recrystallization from Hexane/DCM, product **3I** could be obtained as a yellow solid (1.29 g, 53% yield) with 99% *ee*. M.p.: 167.0-167.9 °C. <sup>1</sup>H NMR (400 MHz, CDCl<sub>3</sub>) δ 7.74 (t, *J* = 16.7 Hz, 1H), 7.49 (dd, *J* = 23.2, 12.2 Hz, 1H), 7.41-7.29 (m, 2H), 7.22 (dd, *J* = 30.8, 11.9 Hz, 3H), 7.02 (d, *J* = 3.6 Hz, 1H), 6.87-6.59 (m, 1H), 2.78 (s, 3H), 1.17 (dd, *J* = 15.0, 3.1 Hz, 9H); <sup>13</sup>C NMR (101 MHz, CDCl<sub>3</sub>) δ 143.5 (d, *J*<sub>C-P</sub> = 7.1 Hz), 141.2 (d, *J*<sub>C-P</sub> = 18.2 Hz), 140.8, 132.9 (d, *J*<sub>C-P</sub> = 10.7 Hz), 132.3 (d, *J*<sub>C-P</sub> = 10.7 Hz), 131.0 (d, *J*<sub>C-P</sub> = 2.5 Hz), 129.5, 129.1, 128.2, 127.6 (d, *J*<sub>C-P</sub> = 67.4 Hz), 124.6 (d, *J*<sub>C-P</sub> = 11.5 Hz), 115.4 (d, *J*<sub>C-P</sub> = 94.3 Hz), 34.3 (d, *J*<sub>C-P</sub> = 72.9 Hz), 24.4, 22.1 (d, *J*<sub>C-P</sub> = 2.1 Hz); <sup>31</sup>P NMR (162 MHz, CDCl<sub>3</sub>) δ 42.7-42.0 (m). HRMS (EI): *m/z*: [M]<sup>+</sup> Calcd for C<sub>17</sub>H<sub>21</sub>OPS: 304.1051, found 304.1047. HPLC (AD-H, 2-propanol /n-hexane = 15/85, flow rate = 1.0 mL/min, λ = 254 nm) tR = 9.8 min (major), 11.3 min (minor).

$[\alpha]_D^{20} = 208.1$  ( $c = 0.5$ ,  $\text{CHCl}_3$ ).

<Chromatogram>  
mAU

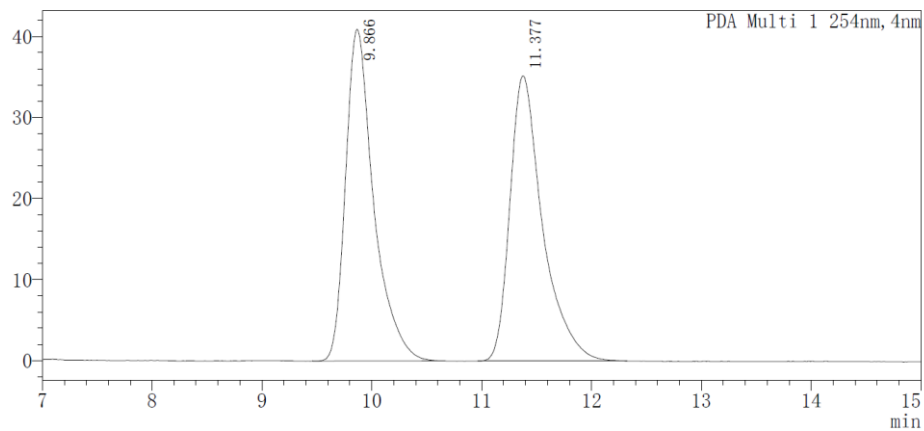

<Peak Table>

PDA Ch1 254nm

| No.   | Ret. Time (min) | Height (mAU) | Height% | Area (mAU*min) | Area%   |
|-------|-----------------|--------------|---------|----------------|---------|
| 1     | 9.866           | 40942        | 53.777  | 729229         | 50.029  |
| 2     | 11.377          | 35191        | 46.223  | 728393         | 49.971  |
| Total |                 | 76133        | 100.000 | 1457622        | 100.000 |

<Chromatogram>  
mAU

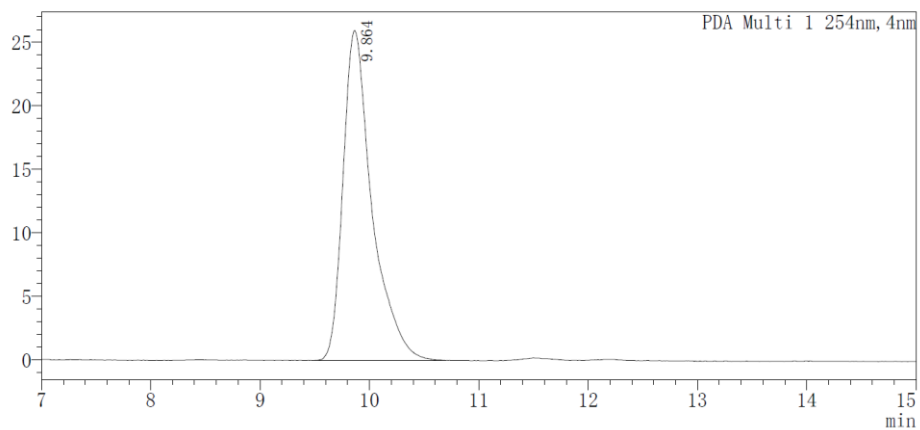

<Peak Table>

PDA Ch1 254nm

| No. | Ret. Time (min) | Height (mAU) | Height% | Area (mAU*min) | Area%   |
|-----|-----------------|--------------|---------|----------------|---------|
| 1   | 9.864           | 25972        | 100.000 | 478462         | 100.000 |
| 总计  |                 | 25972        | 100.000 | 478462         | 100.000 |

Total

### 3.12 (1*R*,2*R*)-2-(2-bromobenzyl)-1-(*tert*-butyl)-2,3-dihydrophosphindole 1-oxide

(4b)

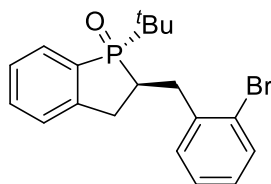

Prepared according to general procedure B from **3b** (4.5 mmol), after a flash column chromatography (EA: CH<sub>3</sub>OH = 40:1, R<sub>f</sub> = 0.6) afforded the product **4b** (major isomer) as a colorless liquid (1.20 g, 71% yield). The minor isomer **4b'** (EA: CH<sub>3</sub>OH = 40:1, R<sub>f</sub> = 0.55) was failed to be isolated as a pure form (80 mg, 4% yield). <sup>1</sup>H NMR (400 MHz, CDCl<sub>3</sub>) (major isomer) δ 7.82-7.73 (m, 1H), 7.62-7.54 (m, 1H), 7.53-7.43 (m, 1H), 7.38-7.33 (m, 1H), 7.29-7.24 (m, 3H), 7.18-7.04 (m, 1H), 3.49-3.43 (m, 1H), 3.01-2.97 (m, 3H), 2.88-2.73 (m, 1H), 1.24-1.20 (m, 9H); <sup>13</sup>C NMR (101 MHz, CDCl<sub>3</sub>) δ 146.0 (d, J<sub>C-P</sub> = 27.3 Hz), 139.3 (d, J<sub>C-P</sub> = 11.8 Hz), 133.0, 132.4 (d, J<sub>C-P</sub> = 2.6 Hz), 132.0, 129.7 (d, J<sub>C-P</sub> = 8.3 Hz), 128.7 (d, J<sub>C-P</sub> = 42.4 Hz), 128.2, 127.4, 127.3 (d, J<sub>C-P</sub> = 9.4 Hz), 126.5 (d, J<sub>C-P</sub> = 10.5 Hz), 124.6, 35.5 (d, J<sub>C-P</sub> = 2.0 Hz), 35.0 (d, J<sub>C-P</sub> = 5.1 Hz), 33.4 (d, J<sub>C-P</sub> = 67.2 Hz), 30.8 (d, J<sub>C-P</sub> = 61.4 Hz), 24.0; <sup>31</sup>P NMR (162 MHz, CDCl<sub>3</sub>) δ 72.8. HRMS (EI): m/z: [M]<sup>+</sup> Calcd for C<sub>19</sub>H<sub>22</sub>BrOP: 376.0592, found 376.0586. [α]<sub>D</sub><sup>20</sup> = 5.9 (c = 0.25, CHCl<sub>3</sub>).

**(1R,2S)-1-(tert-butyl)-2-(2-fluorobenzyl)-2,3-dihydrophosphindole 1-oxide (4c)**

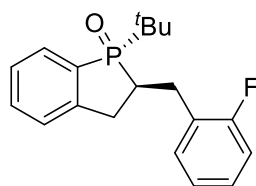

Prepared according to general procedure B from **3c** (4.1 mmol), after a flash column chromatography (EA: CH<sub>3</sub>OH = 50:1, R<sub>f</sub> = 0.5) afforded the product **4c** (major isomer) as a colorless solid (890 mg, 69% yield). M.p.: 149.0-149.9 °C. The minor isomer **4c'** (EA: CH<sub>3</sub>OH = 40:1, R<sub>f</sub> = 0.45) was failed to be isolated as a pure form (148 mg, 11% yield). <sup>1</sup>H NMR (400 MHz, CDCl<sub>3</sub>) (major isomer) δ 7.77 (t, J = 7.4 Hz, 1H), 7.50-7.46 (m, 1H), 7.38-7.34 (m, 1H), 7.29-7.23 (m, 3H), 7.16-6.99 (m, 2H), 3.45-3.29 (m, 1H), 3.08-2.96 (m, 2H), 2.84-2.59 (m, 2H), 1.22 (d, J = 14.8 Hz, 9H); <sup>13</sup>C NMR (101 MHz, CDCl<sub>3</sub>) δ 161.4 (d, J<sub>C-F</sub> = 245.4 Hz), 146.0 (d, J<sub>C-P</sub> = 26.9 Hz), 132.5 (d, J<sub>C-F</sub> = 2.2 Hz), 131.6 (d, J<sub>C-P</sub> = 5.0 Hz), 130.4 (d, J<sub>C-P</sub> = 90.8 Hz), 129.8 (d, J<sub>C-F</sub> = 8.1 Hz), 128.2 (d, J<sub>C-F</sub> = 8.4 Hz), 127.3 (d, J<sub>C-P</sub> = 9.3 Hz), 127.1 (d, J<sub>C-P</sub> = 12.4 Hz), 126.5 (d, J<sub>C-P</sub> = 10.3 Hz), 124.0 (d, J<sub>C-F</sub> = 3.6 Hz), 115.3 (d, J<sub>C-F</sub> = 21.9 Hz), 35.4 (d, J<sub>C-P</sub> = 5.1 Hz), 33.4 (d, J<sub>C-P</sub> = 67.5 Hz), 31.6 (d, J<sub>C-P</sub> = 60.0 Hz), 29.3, 24.0; <sup>31</sup>P NMR (162 MHz,

Acetone)  $\delta$  71.6;  $^{19}\text{F}$  NMR (376 MHz,  $\text{CDCl}_3$ )  $\delta$  117.6. HRMS (EI):  $m/z$ :  $[\text{M}]^+$  Calcd for  $\text{C}_{19}\text{H}_{22}\text{FOP}$ : 316.1392, found 316.1390.  $[\alpha]_{\text{D}}^{20} = 44.4$  ( $c = 0.5$ ,  $\text{CHCl}_3$ ).

### 3.13 (1*R*,2*S*)-1-(tert-butyl)-2-(3-chlorobenzyl)-2,3-dihydrophosphindole 1-oxide (4d)

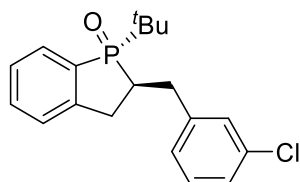

Prepared according to general procedure B from **3d** (4.6 mmol), after a flash column chromatography (EA:  $\text{CH}_3\text{OH} = 40:1$ ,  $R_f = 0.5$ ) afforded the product **4d** (major isomer) as a colorless solid (842 mg, 55% yield). M.p.: 110.0-110.9 °C. The minor isomer **4d'** (EA:  $\text{CH}_3\text{OH} = 40:1$ ,  $R_f = 0.45$ ) was failed to be isolated as a pure form (270 mg, 18% yield).  $^1\text{H}$  NMR (400 MHz,  $\text{CDCl}_3$ ) (major isomer)  $\delta$  7.79-7.75 (m, 1H), 7.51-7.48 (m, 1H), 7.40-7.35 (m, 1H), 7.29-7.24 (m, 4H), 7.15 (d,  $J = 7.1$  Hz, 1H), 3.40-3.29 (m, 1H), 3.10-3.03 (m, 1H), 2.96-2.86 (m, 1H), 2.75-2.54 (m, 2H), 1.22 (d,  $J = 14.8$  Hz, 9H);  $^{13}\text{C}$  NMR (101 MHz,  $\text{CDCl}_3$ )  $\delta$  145.8 (d,  $J_{\text{C-P}} = 27.0$  Hz), 142.3 (d,  $J_{\text{C-P}} = 11.8$  Hz), 134.4, 132.7 (d,  $J_{\text{C-P}} = 2.4$  Hz), 130.2 (d,  $J_{\text{C-P}} = 90.8$  Hz), 130.0, 129.7, 129.0, 127.5 (d,  $J_{\text{C-P}} = 9.4$  Hz), 127.4, 126.7 (d,  $J_{\text{C-P}} = 10.9$  Hz), 126.6, 35.4 (d,  $J_{\text{C-P}} = 5.2$  Hz), 34.8 (d,  $J_{\text{C-P}} = 2.6$  Hz), 33.5 (d,  $J_{\text{C-P}} = 67.6$  Hz), 33.0 (d,  $J_{\text{C-P}} = 61.3$  Hz), 24.1.  $^{31}\text{P}$  NMR (162 MHz,  $\text{CDCl}_3$ )  $\delta$  72.5. HRMS (EI):  $m/z$ :  $[\text{M}]^+$  Calcd for  $\text{C}_{19}\text{H}_{22}\text{ClOP}$ : 332.1097, found 332.1092.  $[\alpha]_{\text{D}}^{20} = 58.5$  ( $c = 0.5$ ,  $\text{CHCl}_3$ ).

### 3.14 (1*R*,2*S*)-1-(tert-butyl)-2-(3-methylbenzyl)-2,3-dihydrophosphindole 1-oxide (4e)

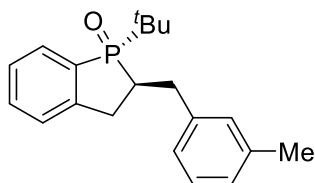

Prepared according to general procedure B from **3e** (4.8 mmol), after a flash column chromatography (EA:  $\text{CH}_3\text{OH} = 40:1$ ,  $R_f = 0.6$ ) afforded the product **4e** (major isomer) as colorless solids (580 mg, 38% yield). M.p.: 151.0-151.9 °C.  $^1\text{H}$  NMR (400 MHz,



CDCl<sub>3</sub>) δ 7.80-7.77 (m, 1H), 7.51-7.47 (m, 1H), 7.40-7.35 (m, 1H), 7.28-7.22 (m, 2H), 7.09-7.06 (m, 3H), 3.38-3.33 (m, 1H), 3.13-2.90 (m, 2H), 2.74-2.68 (m, 1H), 2.65-2.56 (m, 1H), 2.38 (s, 3H), 1.24 (d, *J* = 14.6 Hz, 9H); <sup>13</sup>C NMR (101 MHz, CDCl<sub>3</sub>) δ 146.1 (d, *J*<sub>C-P</sub> = 27.5 Hz), 140.1 (d, *J*<sub>C-P</sub> = 12.4 Hz), 138.1, 132.5 (d, *J*<sub>C-P</sub> = 2.4 Hz), 130.8, 129.9 (d, *J*<sub>C-P</sub> = 8.3 Hz), 129.7, 128.4, 127.3 (d, *J*<sub>C-P</sub> = 9.4 Hz), 127.1, 126.6 (d, *J*<sub>C-P</sub> = 10.2 Hz), 126.0, 35.3 (d, *J*<sub>C-P</sub> = 5.3 Hz), 34.8 (d, *J*<sub>C-P</sub> = 2.3 Hz), 33.5 (d, *J*<sub>C-P</sub> = 66.9 Hz), 33.1 (d, *J*<sub>C-P</sub> = 61.6 Hz), 24.1, 21.4; <sup>31</sup>P NMR (162 MHz, CDCl<sub>3</sub>) δ 72.4. HRMS (EI): *m/z*: [M]<sup>+</sup> Calcd for C<sub>20</sub>H<sub>25</sub>OP: 312.1643, found 312.1638. [α]<sub>D</sub><sup>20</sup> = 60.6 (*c* = 0.5, CHCl<sub>3</sub>).

**3.15 (1*R*,2*R*)-1-(*tert*-butyl)-2-(3-methylbenzyl)-2,3-dihydrophosphindole 1-oxide (4e')**

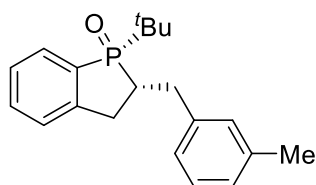

Prepared according to general procedure B from **3e** (4.8 mmol), after a flash column chromatography (EA: CH<sub>3</sub>OH = 40:1, *R*<sub>f</sub> = 0.5) afforded the product **4e'** (minor isomer) as colorless solids (289 mg, 20% yield). M.p.: 155.0-155.9 °C. <sup>1</sup>H NMR (400 MHz, CDCl<sub>3</sub>) δ 7.99-7.95 (m, 1H), 7.48-7.39 (m, 2H), 7.30-7.21 (m, 2H), 7.11-7.10 (m, 3H), 3.36-3.29 (m, 1H), 3.07-2.87 (m, 2H), 2.53-2.25 (m, 5H), 1.21 (d, *J* = 14.7 Hz, 9H); <sup>13</sup>C NMR (101 MHz, CDCl<sub>3</sub>) δ 145.2 (d, *J*<sub>C-P</sub> = 13.1 Hz), 143.6 (d, *J*<sub>C-P</sub> = 7.7 Hz), 138.5, 132.5 (d, *J*<sub>C-P</sub> = 5.9 Hz), 131.6 (d, *J*<sub>C-P</sub> = 2.3 Hz), 129.1 (d, *J*<sub>C-P</sub> = 9.5 Hz), 128.7, 127.7, 127.6, 127.2, 126.7 (d, *J*<sub>C-P</sub> = 10.1 Hz), 123.4, 39.8 (d, *J*<sub>C-P</sub> = 4.3 Hz), 38.0 (d, *J*<sub>C-P</sub> = 2.9 Hz), 33.3 (d, *J*<sub>C-P</sub> = 70.4 Hz), 32.3 (d, *J*<sub>C-P</sub> = 56.8 Hz), 24.0, 21.5; <sup>31</sup>P NMR (162 MHz, CDCl<sub>3</sub>) δ 40.7. HRMS (EI): *m/z*: [M]<sup>+</sup> Calcd for C<sub>20</sub>H<sub>25</sub>OP: 312.1643, found 312.1638. HPLC (AD-H, 2-propanol /*n*-hexane = 20/80, flow rate = 1.0 mL/min, λ = 254 nm) t<sub>R</sub> = 9.9 min (major), 30.5 min (minor). [α]<sub>D</sub><sup>20</sup> = 70.5 (*c* = 0.5, CHCl<sub>3</sub>).

<Chromatogram>  
mAU

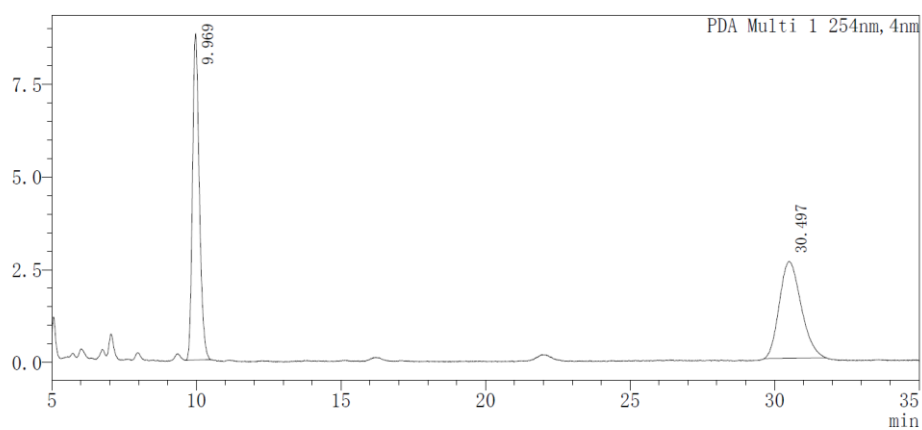

<Peak Table>

PDA Ch1 254nm

| No.   | Ret. Time (min) | Height (mAU) | Height% | Area (mAU*min) | Area%   |
|-------|-----------------|--------------|---------|----------------|---------|
| 1     | 9.969           | 8802         | 77.116  | 144588         | 51.348  |
| 2     | 30.497          | 2612         | 22.884  | 136997         | 48.652  |
| Total |                 | 11414        | 100.000 | 281585         | 100.000 |

<Chromatogram>  
mAU

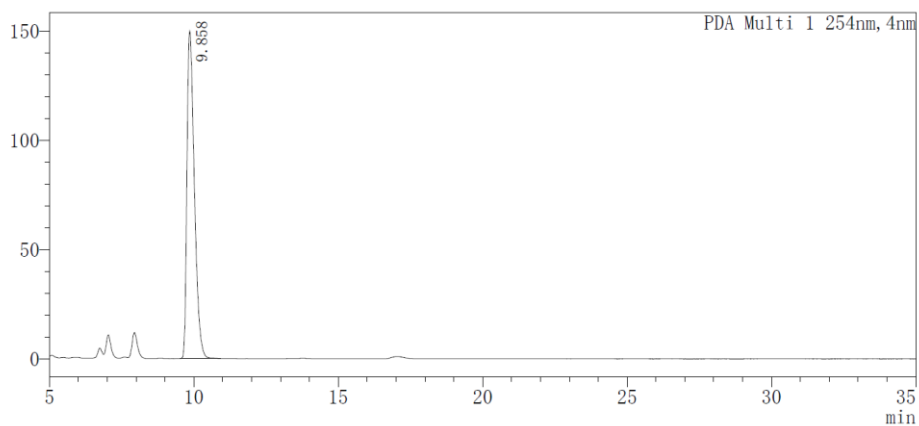

<Peak Table>

PDA Ch1 254nm

| No. | Ret. Time (min) | Height (mAU) | Height% | Area (mAU*min) | Area%   |
|-----|-----------------|--------------|---------|----------------|---------|
| 1   | 9.858           | 149859       | 100.000 | 2675075        | 100.000 |
| 总计  |                 | 149859       | 100.000 | 2675075        | 100.000 |

Total

### 3.16 (1*R*,2*S*)-2-([1,1'-biphenyl]-4-ylmethyl)-1-(tert-butyl)-2,3-dihydrophosphindole 1-oxide (4f)

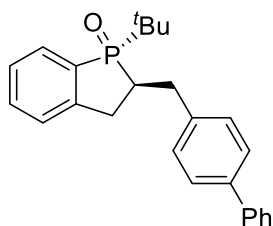

Prepared according to general procedure B from **3f** (3.8 mmol), after a flash column chromatography (EA: CH<sub>3</sub>OH = 40:1, R<sub>f</sub> = 0.5) afforded the product **4f** (major isomer) as colorless solids (740 mg, 52% yield). M.p.: 117.0-117.9 °C. **<sup>1</sup>H NMR** (400 MHz, CDCl<sub>3</sub>) δ 7.81 (t, *J* = 7.4 Hz, 1H), 7.65-7.58 (m, 4H), 7.55-7.43 (m, 3H), 7.41-7.39 (m, 4H), 7.32-7.26 (m, 1H), 3.50-3.31 (m, 1H), 3.20-2.95 (m, 2H), 2.81-2.68 (m, 2H), 1.25 (d, *J* = 14.8 Hz, 9H); **<sup>13</sup>C NMR** (101 MHz, CDCl<sub>3</sub>) δ 146.1 (d, *J*<sub>C-P</sub> = 27.0 Hz), 140.9, 139.4, 139.3, 132.7, 130.2 (d, *J*<sub>C-P</sub> = 91.8 Hz), 130.0 (d, *J*<sub>C-P</sub> = 8.1 Hz), 129.5, 128.8, 127.4 (d, *J*<sub>C-P</sub> = 9.2 Hz), 127.3, 127.2, 127.0, 126.7 (d, *J*<sub>C-P</sub> = 10.3 Hz), 35.5 (d, *J*<sub>C-P</sub> = 5.4 Hz), 34.7, 33.6 (d, *J*<sub>C-P</sub> = 66.6 Hz), 33.2 (d, *J*<sub>C-P</sub> = 61.5 Hz), 24.1; **<sup>31</sup>P NMR** (162 MHz, CDCl<sub>3</sub>) δ 72.9. **HRMS** (EI): *m/z*: [M]<sup>+</sup> Calcd for C<sub>25</sub>H<sub>27</sub>OP: 374.1800, found 374.1797. [α]<sub>D</sub><sup>20</sup> = 74.0 (*c* = 0.5, CHCl<sub>3</sub>).

**3.17 (1R,2R)-2-((1,1'-biphenyl)-4-ylmethyl)-1-(tert-butyl)-2,3-dihydrophosphindole 1-oxide (4f')**

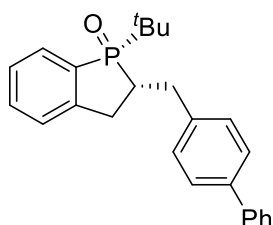

Prepared according to general procedure B from **3f** (3.8 mmol), after a flash column chromatography (EA: CH<sub>3</sub>OH = 40:1, R<sub>f</sub> = 0.4) afforded the product **4f'** (minor isomer) as colorless solids (246 mg, 18% yield). M.p.: 224.0-224.9 °C. **<sup>1</sup>H NMR** (400 MHz, CDCl<sub>3</sub>) δ 8.02-7.95 (m, 1H), 7.65-7.59 (m, 4H), 7.51-7.44 (m, 4H), 7.39 (dd, *J* = 8.3, 2.5 Hz, 3H), 7.26 (dd, *J* = 7.6, 4.4 Hz, 1H), 3.46-3.38 (m, 1H), 3.09-2.95 (m, 2H), 2.55-2.30 (m, 2H), 1.23 (d, *J* = 14.8 Hz, 9H); **<sup>13</sup>C NMR** (101 MHz, CDCl<sub>3</sub>) **<sup>13</sup>C NMR** (101 MHz, CDCl<sub>3</sub>) δ 144.2 (d, *J*<sub>C-P</sub> = 13.1 Hz), 143.5 (d, *J*<sub>C-P</sub> = 8.0 Hz), 140.6, 139.9, 132.5 (d, *J*<sub>C-P</sub> = 6.0 Hz), 131.7 (d, *J*<sub>C-P</sub> = 2.4 Hz), 129.1 (d, *J*<sub>C-P</sub> = 9.9 Hz), 128.8, 127.5, 127.3,

126.9 (d,  $J_{C-P} = 10.6$  Hz), 126.9, 126.8 (d,  $J_{C-P} = 9.9$  Hz), 126.7, 39.9 (d,  $J_{C-P} = 4.0$  Hz), 37.8 (d,  $J_{C-P} = 2.9$  Hz), 33.4 (d,  $J_{C-P} = 70.4$  Hz), 32.2 (d,  $J_{C-P} = 57.0$  Hz), 24.0;  $^{31}\text{P}$  NMR (162 MHz,  $\text{CDCl}_3$ )  $\delta$  41.0-40.7 (m). HRMS (EI):  $m/z$ :  $[\text{M}]^+$  Calcd for  $\text{C}_{25}\text{H}_{27}\text{OP}$ : 374.1800, found 374.1795.  $[\alpha]_{\text{D}}^{20} = 80.8$  ( $c = 0.1$ ,  $\text{CHCl}_3$ ).

**3.18 (1*R*,2*S*)-1-(tert-butyl)-2-(4-(trifluoromethyl)benzyl)-2,3-dihydrophosphindole 1-oxide (4g)**

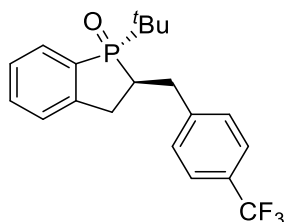

Prepared according to general procedure B from **3g** (3.4 mmol), after a flash column chromatography (EA:  $\text{CH}_3\text{OH} = 40:1$ ,  $R_f = 0.5$ ) afforded the product **4g** (major isomer) as a colorless solid (138 mg, 11% yield). M.p.: 180.0-180.9 °C. The minor isomer **4g'** (EA:  $\text{CH}_3\text{OH} = 40:1$ ,  $R_f = 0.45$ ) was failed to be isolated as a pure form (34 mg, 3% yield).  $^1\text{H}$  NMR (400 MHz,  $\text{CDCl}_3$ )  $\delta$  7.78 (t,  $J = 7.4$  Hz, 1H), 7.59 (d,  $J = 8.0$  Hz, 2H), 7.52-7.48 (m, 1H), 7.39 (dd,  $J = 8.0, 2.3$  Hz, 3H), 7.27-7.24 (m, 1H), 3.48-3.34 (m, 1H), 3.11-3.03 (m, 1H), 2.97-2.89 (m, 1H), 2.77-2.64 (m, 2H), 1.21 (d,  $J = 14.8$  Hz, 9H);  $^{13}\text{C}$  NMR (101 MHz,  $\text{CDCl}_3$ )  $\delta$  145.6 (d,  $J_{C-P} = 26.9$  Hz), 144.3 (d,  $J_{C-P} = 11.7$  Hz), 132.7 (d,  $J_{C-F} = 2.7$  Hz), 130.0 (d,  $J_{C-P} = 91.1$  Hz), 129.9 (d,  $J_{C-F} = 8.1$  Hz), 129.4 (d,  $J_{C-P} = 50.5$  Hz), 129.3, 128.7 (d,  $J_{C-F} = 32.4$  Hz), 128.6 (d,  $J_{C-P} = 60.6$  Hz), 127.5 (d,  $J_{C-F} = 9.3$  Hz), 126.6 (d,  $J_{C-P} = 10.2$  Hz), 125.4 (q,  $J_{C-F} = 3.7$  Hz), 124.2 (q,  $J_{C-F} = 272.7$  Hz), 35.4 (d,  $J_{C-P} = 5.7$  Hz), 35.0 (d,  $J_{C-P} = 2.2$  Hz), 33.5 (d,  $J_{C-P} = 67.4$  Hz), 32.9 (d,  $J_{C-P} = 61.1$  Hz), 24.0;  $^{31}\text{P}$  NMR (162 MHz,  $\text{CDCl}_3$ )  $\delta$  72.7;  $^{19}\text{F}$  NMR (376 MHz,  $\text{CDCl}_3$ )  $\delta$  -62.4. HRMS (EI):  $m/z$ :  $[\text{M}]^+$  Calcd for  $\text{C}_{20}\text{H}_{22}\text{F}_3\text{OP}$ : 366.1360, found 366.1356.  $[\alpha]_{\text{D}}^{20} = 80.8$  ( $c = 0.5$ ,  $\text{CHCl}_3$ ).

**3.19 (1*R*,2*S*)-1-(tert-butyl)-2-(4-propylbenzyl)-2,3-dihydrophosphindole 1-oxide (4i)**

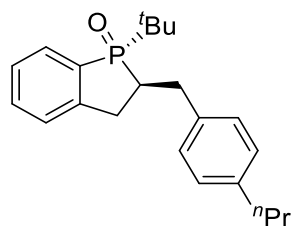

Prepared according to general procedure B from **3i** (3.6 mmol), after a flash column chromatography (EA: CH<sub>3</sub>OH = 40:1, R<sub>f</sub> = 0.6) afforded the product **4i** (minor isomer) as colorless solids (186 mg, 15% yield). M.p.: 169.0-169.9 °C. <sup>1</sup>H NMR (400 MHz, CDCl<sub>3</sub>) δ 7.78 (t, *J* = 7.4 Hz, 1H), 7.51-7.46 (m, 1H), 7.39-7.35 (m, 1H), 7.32-7.23 (m, 1H), 7.21-7.11 (m, 4H), 3.38-3.32 (m, 1H), 3.14-2.88 (m, 2H), 2.83-2.44 (m, 4H), 1.70-1.61 (m, 2H), 1.23 (d, *J* = 14.7 Hz, 9H), 0.96 (t, *J* = 7.3 Hz, 3H); <sup>13</sup>C NMR (101 MHz, CDCl<sub>3</sub>) δ 146.1 (d, *J*<sub>C-P</sub> = 27.3 Hz), 140.7, 137.3 (d, *J*<sub>C-P</sub> = 12.4 Hz), 132.4 (d, *J*<sub>C-P</sub> = 2.6 Hz), 130.7, 129.8 (d, *J*<sub>C-P</sub> = 8.2 Hz), 128.7 (d, *J*<sub>C-P</sub> = 19.5 Hz), 128.1, 127.2 (d, *J*<sub>C-P</sub> = 9.3 Hz), 126.5 (d, *J*<sub>C-P</sub> = 10.3 Hz), 37.6, 35.3 (d, *J*<sub>C-P</sub> = 5.6 Hz), 34.5 (d, *J*<sub>C-P</sub> = 2.5 Hz), 33.4 (d, *J*<sub>C-P</sub> = 66.9 Hz), 33.2 (d, *J*<sub>C-P</sub> = 61.2 Hz), 24.5, 24.0, 13.8; <sup>31</sup>P NMR (162 MHz, CDCl<sub>3</sub>) δ 72.6. HRMS (EI): *m/z*: [M]<sup>+</sup> Calcd for C<sub>22</sub>H<sub>29</sub>OP: 340.1956, found 340.1955. [α]<sub>D</sub><sup>20</sup> = 67.8 (*c* = 0.5, CHCl<sub>3</sub>).

### 3.20 (1*R*,2*S*)-1-(tert-butyl)-2-(4-propylbenzyl)-2,3-dihydrophosphindole 1-oxide (**4i'**)

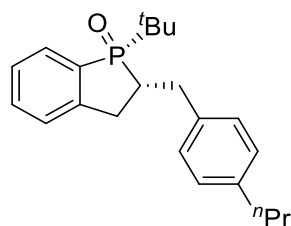

Prepared according to general procedure B from **3i** (3.6 mmol), after a flash column chromatography (EA: CH<sub>3</sub>OH = 40:1, R<sub>f</sub> = 0.5) afforded the product **4i'** (major isomer) as colorless solids (560 mg, 46% yield). M.p.: 165.0-165.9 °C. <sup>1</sup>H NMR (400 MHz, CDCl<sub>3</sub>) δ 8.05-7.87 (m, 1H), 7.56-7.37 (m, 2H), 7.24-7.18 (m, 5H), 3.43-3.23 (m, 1H), 3.06-2.85 (m, 2H), 2.62-2.58 (m, 2H), 2.49-2.21 (m, 2H), 1.69-1.64 (m, 2H), 1.20 (d, *J* = 14.8 Hz, 9H), 0.97 (t, *J* = 7.4 Hz, 3H); <sup>13</sup>C NMR (101 MHz, CDCl<sub>3</sub>) δ 143.7 (d, *J*<sub>C-P</sub> = 8.0 Hz), 142.4 (d, *J*<sub>C-P</sub> = 13.1 Hz), 141.3, 132.5 (d, *J*<sub>C-P</sub> = 6.1 Hz), 131.6 (d, *J*<sub>C-P</sub> = 2.6

Hz), 129.1 (d,  $J_{C-P} = 9.6$  Hz), 128.8, 127.4, 126.7 (d,  $J_{C-P} = 10.4$  Hz), 126.2, 39.9 (d,  $J_{C-P} = 4.3$  Hz), 37.6 (d,  $J_{C-P} = 2.9$  Hz), 37.5, 33.3 (d,  $J_{C-P} = 70.4$  Hz), 32.2 (d,  $J_{C-P} = 57.1$  Hz), 24.5, 23.9, 13.8;  $^{31}\text{P}$  NMR (162 MHz,  $\text{CDCl}_3$ )  $\delta$  41.3-40.8 (m). HRMS (EI):  $m/z$ :  $[\text{M}]^+$  Calcd for  $\text{C}_{22}\text{H}_{29}\text{OP}$ : 340.1956, found 340.1950.  $[\alpha]_{\text{D}}^{20} = 61.9$  ( $c = 0.5$ ,  $\text{CHCl}_3$ ).

### 3.21 (1*R*,2*S*)-1-(tert-butyl)-2-(3,5-di-tert-butylbenzyl)-2,3-dihydrophosphindole 1-oxide (4j)

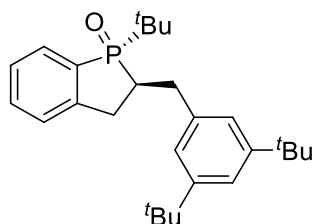

Prepared according to general procedure B from **3j** (5.1 mmol), after a flash column chromatography (EA:  $\text{CH}_3\text{OH} = 40:1$ ,  $R_f = 0.5$ ) afforded the product **4j** (minor isomer) as colorless solids (400 mg, 19% yield). M.p.: 145.0-145.9 °C.  $^1\text{H}$  NMR (400 MHz,  $\text{CDCl}_3$ )  $\delta$  7.82-7.78 (m, 1H), 7.51-7.48 (m, 1H), 7.42-7.25 (m, 3H), 7.16-7.05 (m, 2H), 3.48-3.31 (m, 1H), 3.11-3.00 (m, 2H), 2.74-2.61 (m, 2H), 1.36 (s, 18H), 1.24 (d,  $J = 14.7$  Hz, 9H);  $^{13}\text{C}$  NMR (101 MHz,  $\text{CDCl}_3$ )  $\delta$  150.8, 146.1 (d,  $J_{C-P} = 27.4$  Hz), 139.2 (d,  $J_{C-P} = 11.8$  Hz), 132.4 (d,  $J_{C-P} = 2.2$  Hz), 130.8, 129.9 (d,  $J_{C-P} = 7.9$  Hz), 127.2 (d,  $J_{C-P} = 9.3$  Hz), 126.5 (d,  $J_{C-P} = 10.2$  Hz), 123.1, 120.2, 35.5 (d,  $J_{C-P} = 5.8$  Hz), 35.2 (d,  $J_{C-P} = 2.6$  Hz), 34.7, 33.4 (d,  $J_{C-P} = 66.8$  Hz), 33.3 (d,  $J_{C-P} = 61.1$  Hz), 31.4, 24.1;  $^{31}\text{P}$  NMR (162 MHz,  $\text{CD}_2\text{Cl}_2$ )  $\delta$  72.5. HRMS (EI):  $m/z$ :  $[\text{M}]^+$  Calcd for  $\text{C}_{27}\text{H}_{39}\text{OP}$ : 410.2739, found 410.2726.  $[\alpha]_{\text{D}}^{20} = 76.1$  ( $c = 0.5$ ,  $\text{CHCl}_3$ ).

### 3.22 (1*R*,2*R*)-1-(tert-butyl)-2-(3,5-di-tert-butylbenzyl)-2,3-dihydrophosphindole 1-oxide (4j')

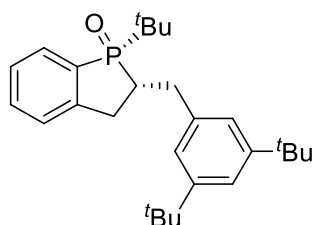

Prepared according to general procedure B from **3j** (5.1 mmol), after a flash column chromatography (EA:  $\text{CH}_3\text{OH} = 40:1$ ,  $R_f = 0.4$ ) afforded the product **4j'** (major isomer)

as colorless solids (800 mg, 38% yield). M.p.: 142.0-142.9 °C.  $^1\text{H NMR}$  (400 MHz,  $\text{CDCl}_3$ )  $\delta$  8.03-7.95 (m, 1H), 7.51-7.35 (m, 3H), 7.27-7.24 (m, 1H), 7.15 (d,  $J = 1.8$  Hz, 2H), 3.43-3.33 (m, 1H), 3.16-2.94 (m, 2H), 2.55-2.41 (m, 1H), 2.35-2.27 (m, 1H), 1.37 (s, 18H), 1.21 (d,  $J = 14.7$  Hz, 9H);  $^{13}\text{C NMR}$  (101 MHz,  $\text{CDCl}_3$ )  $\delta$  151.2, 144.4 (d,  $J_{\text{C-P}} = 13.0$  Hz), 143.9 (d,  $J_{\text{C-P}} = 8.1$  Hz), 132.6 (d,  $J_{\text{C-P}} = 6.4$  Hz), 131.6 (d,  $J_{\text{C-P}} = 2.3$  Hz), 129.1 (d,  $J_{\text{C-P}} = 9.5$  Hz), 127.6, 126.7 (d,  $J_{\text{C-P}} = 10.3$  Hz), 121.0, 120.5, 39.3 (d,  $J_{\text{C-P}} = 4.1$  Hz), 38.5 (d,  $J_{\text{C-P}} = 3.0$  Hz), 34.9, 33.3 (d,  $J_{\text{C-P}} = 70.1$  Hz), 33.0 (d,  $J_{\text{C-P}} = 56.2$  Hz), 31.5, 24.0;  $^{31}\text{P NMR}$  (162 MHz,  $\text{CDCl}_3$ )  $\delta$  41.2-40.9 (m). **HRMS** (EI):  $m/z$ :  $[\text{M}]^+$  Calcd for  $\text{C}_{27}\text{H}_{39}\text{OP}$ : 410.2739, found 410.2734.  $[\alpha]_{\text{D}}^{20} = 76.1$  ( $c = 0.5$ ,  $\text{CHCl}_3$ ).

### 3.23 (1*R*,2*S*)-1-(tert-butyl)-2-(naphthalen-2-ylmethyl)-2,3-dihydrophosphindole 1-oxide (4k)

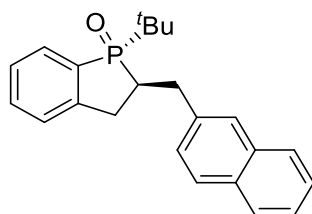

Prepared according to general procedure B from **3k** (4.4 mmol), after a flash column chromatography (EA:  $\text{CH}_3\text{OH} = 40:1$ ,  $R_f = 0.6$ ) afforded the product **4k** (major isomer) as colorless solids (1.03 g, 67% yield). M.p.: 142.0-142.9 °C.  $^1\text{H NMR}$  (400 MHz,  $\text{CDCl}_3$ )  $\delta$  7.86-7.79 (m, 4H), 7.69 (s, 1H), 7.55-7.46 (m, 3H), 7.45-7.34 (m, 2H), 7.28-7.21 (m, 1H), 3.58-3.54 (m, 1H), 3.05-3.01 (m, 2H), 2.85-2.81 (m, 2H), 1.26 (d,  $J = 14.6$  Hz, 9H);  $^{13}\text{C NMR}$  (101 MHz,  $\text{CDCl}_3$ )  $\delta$  146.1 (d,  $J_{\text{C-P}} = 27.4$  Hz), 137.7 (d,  $J_{\text{C-P}} = 12.3$  Hz), 133.6, 132.6 (d,  $J_{\text{C-P}} = 2.3$  Hz), 132.2, 130.8, 130.0 (d,  $J_{\text{C-P}} = 8.0$  Hz), 128.4, 127.7, 127.5, 127.5, 127.4, 127.4 (d,  $J_{\text{C-P}} = 11.0$  Hz), 126.7 (d,  $J_{\text{C-P}} = 10.3$  Hz), 126.2, 125.5, 35.4 (d,  $J_{\text{C-P}} = 5.6$  Hz), 35.2 (d,  $J_{\text{C-P}} = 2.3$  Hz), 33.6 (d,  $J_{\text{C-P}} = 67.0$  Hz), 33.1 (d,  $J_{\text{C-P}} = 61.5$  Hz), 24.2;  $^{31}\text{P NMR}$  (162 MHz,  $\text{CDCl}_3$ )  $\delta$  72.4. **HRMS** (EI):  $m/z$ :  $[\text{M}]^+$  Calcd for  $\text{C}_{23}\text{H}_{25}\text{OP}$ : 348.1643, found 348.1639.  $[\alpha]_{\text{D}}^{20} = 76.1$  ( $c = 0.5$ ,  $\text{CHCl}_3$ ).

### 3.24 (1*R*,2*R*)-1-(tert-butyl)-2-(naphthalen-2-ylmethyl)-2,3-dihydrophosphindole 1-oxide (4k')

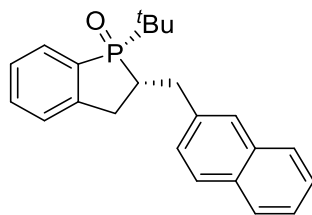

Prepared according to general procedure B from **3k** (4.4 mmol), after a flash column chromatography (EA: CH<sub>3</sub>OH = 40:1, R<sub>f</sub> = 0.5) afforded the product **4k'** (minor isomer) as colorless solids (260 mg, 17% yield). M.p.: 281.0-281.9 °C. <sup>1</sup>H NMR (400 MHz, CDCl<sub>3</sub>) δ 8.01 (t, *J* = 8.7 Hz, 1H), 7.91-7.82 (m, 3H), 7.76-7.70 (m, 1H), 7.55-7.39 (m, 5H), 7.27 (dd, *J* = 8.6, 3.9 Hz, 1H), 3.57-3.51 (m, 1H), 3.09 (d, *J* = 9.0 Hz, 2H), 2.61-2.35 (m, 2H), 1.24 (d, *J* = 14.4 Hz, 9H); <sup>13</sup>C NMR (101 MHz, CDCl<sub>3</sub>) δ 143.6 (d, *J*<sub>C-P</sub> = 7.9 Hz), 142.6 (d, *J*<sub>C-P</sub> = 12.9 Hz), 133.6, 132.6 (d, *J*<sub>C-P</sub> = 5.8 Hz), 132.5, 131.8, 129.2 (d, *J*<sub>C-P</sub> = 9.4 Hz), 128.7, 127.7, 127.6, 126.9 (d, *J*<sub>C-P</sub> = 9.9 Hz), 126.4, 125.8, 125.7, 124.9 (d, *J*<sub>C-P</sub> = 48.8 Hz), 124.9, 40.0 (d, *J*<sub>C-P</sub> = 3.6 Hz), 38.3, 32.2 (d, *J*<sub>C-P</sub> = 57.1 Hz), 25.0 (d, *J*<sub>C-P</sub> = 85.7 Hz), 24.1; <sup>31</sup>P NMR (162 MHz, CDCl<sub>3</sub>) δ 40.8. HRMS (EI): *m/z*: [M]<sup>+</sup> Calcd for C<sub>23</sub>H<sub>25</sub>OP: 348.1643, found 348.1641. [α]<sub>D</sub><sup>20</sup> = 92.0 (*c* = 0.5, CHCl<sub>3</sub>).

### 3.25 (1*R*,2*R*)-1-(tert-butyl)-2-(thiophen-2-ylmethyl)-2,3-dihydrophosphindole 1-oxide (**4l**)

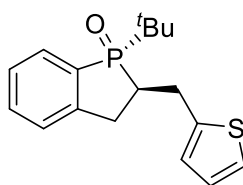

Prepared according to general procedure B from **3l** (4.2 mmol), after a flash column chromatography (EA: CH<sub>3</sub>OH = 40:1, R<sub>f</sub> = 0.5) afforded the product **4l** (major isomer) as a colorless solid (632 mg, 49% yield). M.p.: 161.0-161.9 °C. The minor isomer **4l'** (EA: CH<sub>3</sub>OH = 40:1, R<sub>f</sub> = 0.45) was failed to be isolated as a pure form (79 mg, 6% yield). <sup>1</sup>H NMR (400 MHz, CDCl<sub>3</sub>) δ 7.77 (t, *J* = 7.5 Hz, 1H), 7.52-7.47 (m, 1H), 7.41-7.35 (m, 1H), 7.33-7.25 (m, 1H), 7.21-7.18 (m, 1H), 6.98-6.95 (m, 1H), 6.90 (d, *J* = 3.3 Hz, 1H), 3.64-3.46 (m, 1H), 3.29-3.01 (m, 2H), 2.97-2.89 (m, 1H), 2.80-2.58 (m, 1H), 1.22 (d, *J* = 14.8 Hz, 9H); <sup>13</sup>C NMR (101 MHz, CDCl<sub>3</sub>) δ 145.8 (d, *J*<sub>C-P</sub> = 27.4 Hz), 142.9 (d, *J*<sub>C-P</sub> = 13.8 Hz), 132.6 (d, *J*<sub>C-P</sub> = 2.7 Hz), 130.0 (d, *J*<sub>C-P</sub> = 91.2 Hz), 129.9 (d,



$J_{C-P} = 8.1$  Hz), 127.4 (d,  $J_{C-P} = 9.2$  Hz), 126.9, 126.62 (d,  $J_{C-P} = 10.3$  Hz), 125.7, 123.8, 35.6 (d,  $J_{C-P} = 5.2$  Hz), 33.7 (d,  $J_{C-P} = 61.0$  Hz), 33.4 (d,  $J_{C-P} = 67.4$  Hz), 29.6 (d,  $J_{C-P} = 1.9$  Hz), 24.0;  $^{31}\text{P}$  NMR (162 MHz,  $\text{CDCl}_3$ )  $\delta$  72.3. HRMS (EI):  $m/z$ :  $[\text{M}]^+$  Calcd for  $\text{C}_{17}\text{H}_{21}\text{OPS}$ : 304.1051, found 304.1049.  $[\alpha]_{\text{D}}^{20} = 74.5$  ( $c = 0.5$ ,  $\text{CHCl}_3$ ).

### 3.26 (1*S*,2*S*)-2-benzyl-1-(tert-butyl)-2,3-dihydrophosphindole 1-borane (5a)

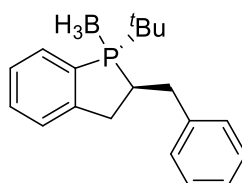

Prepared according to general procedure C from **4a** (2.5 mmol), after a flash column chromatography (hexane : EA = 50:1) afforded the product **5a** as a colorless solid (577 mg, 78% yield). M.p.: 116.0-116.9 °C.  $^1\text{H}$  NMR (400 MHz,  $\text{CDCl}_3$ )  $\delta$  7.67-7.64 (m, 1H), 7.47-7.43 (m, 1H), 7.40-7.36 (m, 3H), 7.28-7.26 (m, 4H), 3.42-3.11 (m, 2H), 3.09-2.95 (m, 1H), 2.89-2.81 (m, 1H), 2.74-2.66 (m, 1H), 1.24 (d,  $J = 13.7$  Hz, 9H), 1.24-0.47 (br., 3H);  $^{13}\text{C}$  NMR (101 MHz,  $\text{CDCl}_3$ )  $\delta$  147.2 (d,  $J_{C-P} = 12.8$  Hz), 140.2 (d,  $J_{C-P} = 13.9$  Hz), 131.4, 130.6 (d,  $J_{C-P} = 10.2$  Hz), 130.0 (d,  $J_{C-P} = 53.0$  Hz), 128.8, 128.6, 127.4 (d,  $J_{C-P} = 8.8$  Hz), 126.4, 125.6 (d,  $J_{C-P} = 7.3$  Hz), 38.4, 37.3 (d,  $J_{C-P} = 5.4$  Hz), 32.5 (d,  $J_{C-P} = 31.5$  Hz), 30.5 (d,  $J_{C-P} = 27.7$  Hz), 25.4 (d,  $J_{C-P} = 2.5$  Hz);  $^{31}\text{P}$  NMR (162 MHz,  $\text{CDCl}_3$ )  $\delta$  64.3. HRMS (EI):  $m/z$ :  $[\text{M-BH}_3]^+$  Calcd for  $\text{C}_{19}\text{H}_{23}\text{P}$ : 282.1537, found 282.1529.  $[\alpha]_{\text{D}}^{20} = 59.7$  ( $c = 0.5$ ,  $\text{CHCl}_3$ ).

### 3.27 (1*S*,2*R*)-2-benzyl-1-(tert-butyl)-2,3-dihydrophosphindole 1-borane (5a')

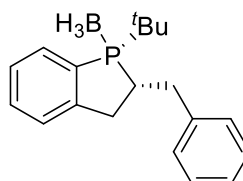

Prepared according to general procedure C from **4a'** (1.2 mmol), after a flash column chromatography (hexane : EA = 50:1) afforded the product **5a'** as a colorless solid (277 mg, 75% yield). M.p.: 183.0-183.9 °C.  $^1\text{H}$  NMR (400 MHz,  $\text{CDCl}_3$ )  $\delta$  7.81-7.77 (m, 1H), 7.49-7.25 (m, 7H), 7.25-7.11 (m, 1H), 3.32-3.15 (m, 1H), 3.14-2.87 (m, 2H), 2.46-2.11 (m, 2H), 1.21 (d,  $J = 13.8$  Hz, 9H), 1.24-0.47 (br., 3H);  $^{13}\text{C}$  NMR (101 MHz,

CDCl<sub>3</sub>) δ 145.2 (d,  $J_{C-P}$  = 10.5 Hz), 144.3, 133.9 (d,  $J_{C-P}$  = 13.0 Hz), 130.6 (d,  $J_{C-P}$  = 2.4 Hz), 129.5 (d,  $J_{C-P}$  = 6.0 Hz), 128.8, 127.0, 126.8 (d,  $J_{C-P}$  = 10.8 Hz), 126.5, 123.5 (d,  $J_{C-P}$  = 47.3 Hz), 39.8 (d,  $J_{C-P}$  = 3.4 Hz), 39.2 (d,  $J_{C-P}$  = 3.8 Hz), 30.1 (d,  $J_{C-P}$  = 30.7 Hz), 26.4 (d,  $J_{C-P}$  = 32.1 Hz), 25.1 (d,  $J_{C-P}$  = 2.3 Hz); <sup>31</sup>P NMR (162 MHz, CDCl<sub>3</sub>) δ 24.2. HRMS (EI): m/z: [M-BH<sub>3</sub>]<sup>+</sup> Calcd for C<sub>19</sub>H<sub>23</sub>P: 282.1537, found 282.1532. [α]<sub>D</sub><sup>20</sup> = 29.8 (*c* = 0.5, CHCl<sub>3</sub>).

### 3.28 (1*S*,2*R*)-2-(2-bromobenzyl)-1-(tert-butyl)-2,3-dihydrophosphindole 1-borane (5b)

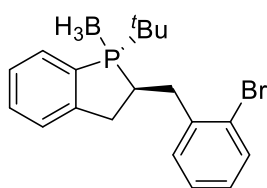

Prepared according to general procedure C from **4b** (3.2 mmol), after a flash column chromatography (hexane : EA = 50:1) afforded the product **5b** as a colorless solid (880 mg, 74% yield). M.p.: 128.0-128.9 °C. <sup>1</sup>H NMR δ 7.70-7.54 (m, 2H), 7.46-7.42 (m, 1H), 7.37-7.31 (m, 1H), 7.29-2.25 (m, 3H), 7.18-7.14 (m, 1H), 3.44-3.39 (m, 1H), 3.25-2.95 (m, 3H), 2.92-2.68 (m, 1H), 1.24 (d, *J* = 13.8 Hz, 9H), 1.24-0.42 (br., 3H); <sup>13</sup>C NMR (101 MHz, CDCl<sub>3</sub>) δ 147.1 (d,  $J_{C-P}$  = 12.7 Hz), 139.4 (d,  $J_{C-P}$  = 13.8 Hz), 133.2, 131.9, 131.4, 130.6 (d,  $J_{C-P}$  = 10.2 Hz), 129.5 (d,  $J_{C-P}$  = 121.6 Hz), 128.4, 127.6, 127.5, 125.6 (d,  $J_{C-P}$  = 7.3 Hz), 124.6, 38.0, 37.8 (d,  $J_{C-P}$  = 6.1 Hz), 30.6 (d,  $J_{C-P}$  = 27.6 Hz), 30.6 (d,  $J_{C-P}$  = 30.5 Hz), 25.6 (d,  $J_{C-P}$  = 2.4 Hz); <sup>31</sup>P NMR (162 MHz, CDCl<sub>3</sub>) δ 65.2. HRMS (EI): m/z: [M]<sup>+</sup> Calcd for C<sub>19</sub>H<sub>25</sub>BBrP: 374.0970, found 374.0947. [α]<sub>D</sub><sup>20</sup> = 1.3 (*c* = 0.5, CHCl<sub>3</sub>).

### 3.29 (1*S*,2*S*)-1-(tert-butyl)-2-(2-fluorobenzyl)-2,3-dihydrophosphindole 1-borane (5c)

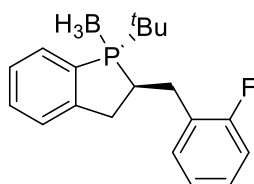

Prepared according to general procedure C from **4c** (2.8 mmol), after a flash column

chromatography (hexane : EA = 50:1) afforded the product **5c** as a colorless solid (601 mg, 68% yield). M.p.: 123.0-123.9 °C. <sup>1</sup>H NMR (400 MHz, CDCl<sub>3</sub>) δ 7.69-7.60 (m, 1H), 7.46-7.42 (m, 1H), 7.38-7.33 (m, 1H), 7.29-7.24 (m, 3H), 7.19-7.03 (m, 2H), 3.36-3.31 (m, 1H), 3.25-3.17 (m, 1H), 3.11-2.86 (m, 2H), 2.79-2.72 (m, 1H), 1.23 (d, *J* = 13.7 Hz, 9H), 1.24-0.42 (br., 3H); <sup>13</sup>C NMR (101 MHz, CDCl<sub>3</sub>) δ 161.4 (d, *J*<sub>C-F</sub> = 245.2 Hz), 147.1 (d, *J*<sub>C-P</sub> = 13.0 Hz), 131.5 (d, *J*<sub>C-F</sub> = 5.1 Hz), 131.4 (d, *J*<sub>C-F</sub> = 2.4 Hz), 130.5 (d, *J*<sub>C-P</sub> = 10.1 Hz), 130.2 (d, *J*<sub>C-P</sub> = 53.1 Hz), 128.4 (d, *J*<sub>C-F</sub> = 8.0 Hz), 127.5 (d, *J*<sub>C-P</sub> = 8.8 Hz), 127.2 (d, *J*<sub>C-F</sub> = 15.0 Hz), 125.6 (d, *J*<sub>C-P</sub> = 7.4 Hz), 124.1 (d, *J*<sub>C-P</sub> = 3.6 Hz), 115.5 (d, *J*<sub>C-F</sub> = 21.9 Hz), 38.4, 31.6 (d, *J*<sub>C-P</sub> = 6.3 Hz), 31.2 (d, *J*<sub>C-P</sub> = 31.1 Hz), 30.5 (d, *J*<sub>C-P</sub> = 27.8 Hz), 25.4 (d, *J*<sub>C-P</sub> = 2.3 Hz); <sup>31</sup>P NMR (162 MHz, C<sub>6</sub>D<sub>6</sub>) δ 62.8; <sup>19</sup>F NMR (376 MHz, CDCl<sub>3</sub>) δ -117.5. HRMS (EI): *m/z*: [M-BH<sub>3</sub>]<sup>+</sup> Calcd for C<sub>19</sub>H<sub>22</sub>FP: 300.1443, found 300.1440. [α]<sub>D</sub><sup>20</sup> = 34.2 (*c* = 0.5, CHCl<sub>3</sub>).

**3.30 (1*S*,2*S*)-1-(tert-butyl)-2-(3-chlorobenzyl)-2,3-dihydrophosphindole 1-borane (5d)**

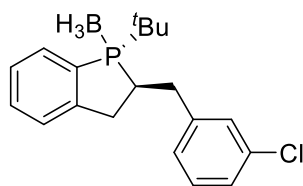

Prepared according to general procedure C from **4d** (3.3 mmol), after a flash column chromatography (hexane : EA = 50:1) afforded the product **5d** as a colorless solid (703 mg, 64% yield). M.p.: 115.0-115.9 °C. <sup>1</sup>H NMR (400 MHz, CDCl<sub>3</sub>) δ 7.68-7.59 (m, 1H), 7.45 (tt, *J* = 7.5, 1.4 Hz, 1H), 7.39-7.34 (m, 1H), 7.29-7.24 (m, 4H), 7.15-7.13 (m, 1H), 3.29-3.21 (m, 2H), 2.98-2.91 (m, 1H), 2.87-2.74 (m, 1H), 2.70-2.63 (m, 1H), 1.22 (d, *J* = 13.7 Hz, 9H), 1.24-0.41 (br., 3H); <sup>13</sup>C NMR (101 MHz, CDCl<sub>3</sub>) δ 147.0 (d, *J*<sub>C-P</sub> = 12.5 Hz), 142.4 (d, *J*<sub>C-P</sub> = 14.5 Hz), 134.5, 131.5 (d, *J*<sub>C-P</sub> = 2.3 Hz), 130.7 (d, *J*<sub>C-P</sub> = 10.6 Hz), 130.0 (d, *J*<sub>C-P</sub> = 53.0 Hz), 129.9, 128.9, 127.6, 127.3, 126.8, 125.7 (d, *J*<sub>C-P</sub> = 7.3 Hz), 38.4, 37.1 (d, *J*<sub>C-P</sub> = 5.7 Hz), 32.3 (d, *J*<sub>C-P</sub> = 31.8 Hz), 30.7 (d, *J*<sub>C-P</sub> = 27.7 Hz), 25.5 (d, *J*<sub>C-P</sub> = 2.6 Hz). <sup>31</sup>P NMR (162 MHz, CDCl<sub>3</sub>) δ 64.9. HRMS (EI): *m/z*: [M-BH<sub>3</sub>]<sup>+</sup> Calcd for [C<sub>19</sub>H<sub>22</sub>ClP]<sup>+</sup>: 316.1148, found 316.1140. [α]<sub>D</sub><sup>20</sup> = 67.8 (*c* = 0.5, CHCl<sub>3</sub>).

**3.31 (1*S*,2*S*)-1-(tert-butyl)-2-(3-methylbenzyl)-2,3-dihydrophosphindole 1-borane (5e)**

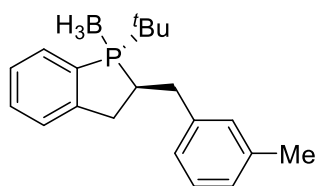

Prepared according to general procedure C from **4e** (1.8 mmol), after a flash column chromatography (hexane : EA = 50:1) afforded the product **5e** as a colorless solid (368 mg, 66% yield). M.p.: 123.0-123.9 °C. <sup>1</sup>H NMR (400 MHz, CDCl<sub>3</sub>) δ 7.66-7.63 (m, 1H), 7.47-7.43 (m, 1H), 7.41-7.32 (m, 1H), 7.29-7.22 (m, 2H), 7.08 (q, *J* = 8.2 Hz, 3H), 3.37-3.17 (m, 2H), 3.02-2.96 (m, 1H), 2.88-2.79 (m, 1H), 2.75-2.55 (m, 1H), 2.40 (s, 3H), 1.23 (d, *J* = 13.7 Hz, 9H), 1.24-0.41 (br., 3H); <sup>13</sup>C NMR (101 MHz, CDCl<sub>3</sub>) δ 147.3 (d, *J*<sub>C-P</sub> = 12.6 Hz), 140.2 (d, *J*<sub>C-P</sub> = 14.1 Hz), 138.2, 131.4 (d, *J*<sub>C-P</sub> = 2.2 Hz), 130.6 (d, *J*<sub>C-P</sub> = 10.2 Hz), 130.0 (d, *J*<sub>C-P</sub> = 53.1 Hz), 129.6, 128.4, 127.4 (d, *J*<sub>C-P</sub> = 8.8 Hz), 127.2, 125.9, 125.6 (d, *J*<sub>C-P</sub> = 7.3 Hz), 38.4, 37.2 (d, *J*<sub>C-P</sub> = 5.2 Hz), 32.4 (d, *J*<sub>C-P</sub> = 31.8 Hz), 30.6 (d, *J*<sub>C-P</sub> = 28.0 Hz), 25.4 (d, *J*<sub>C-P</sub> = 2.7 Hz), 21.4; <sup>31</sup>P NMR (162 MHz, CDCl<sub>3</sub>) δ 64.2. HRMS (EI): *m/z*: [M-BH<sub>3</sub>]<sup>+</sup> Calcd for C<sub>20</sub>H<sub>25</sub>P: 296.1694, found 296.1685. [α]<sub>D</sub><sup>20</sup> = 46.1 (*c* = 0.5, CHCl<sub>3</sub>).

**3.32 (1*S*,2*R*)-1-(tert-butyl)-2-(3-methylbenzyl)-2,3-dihydrophosphindole 1-borane (5e')**

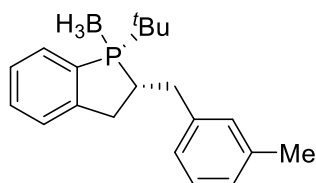

Prepared according to general procedure C from **4e'** (0.9 mmol), after a flash column chromatography (hexane : EA = 50:1) afforded the product **5e'** as a colorless solid (190 mg, 68% yield). M.p.: 174.0-174.9 °C. <sup>1</sup>H NMR (400 MHz, CDCl<sub>3</sub>) δ 7.82-7.77 (m, 1H), 7.46-7.34 (m, 2H), 7.33-7.26 (m, 1H), 7.20 (d, *J* = 7.5 Hz, 1H), 7.13-7.11 (m, 3H), 3.22-3.17 (m, 1H), 3.14-2.90 (m, 2H), 2.41 (s, 3H), 2.37-2.18 (m, 2H), 1.21 (d, *J* = 13.8 Hz, 9H), 1.22-0.47 (br., 3H); <sup>13</sup>C NMR (101 MHz, CDCl<sub>3</sub>) δ 145.2 (d, *J*<sub>C-P</sub> = 10.2 Hz),

144.4, 138.5, 133.9 (d,  $J_{C-P}$  = 13.1 Hz), 130.6 (d,  $J_{C-P}$  = 2.7 Hz), 129.5 (d,  $J_{C-P}$  = 5.9 Hz), 128.7, 127.7, 127.3, 126.7 (d,  $J_{C-P}$  = 11.0 Hz), 123.5 (d,  $J_{C-P}$  = 47.3 Hz), 123.4, 39.7, 39.1 (d,  $J_{C-P}$  = 3.7 Hz), 30.1 (d,  $J_{C-P}$  = 31.1 Hz), 26.5 (d,  $J_{C-P}$  = 32.0 Hz), 25.1 (d,  $J_{C-P}$  = 2.7 Hz), 21.4;  $^{31}\text{P}$  NMR (162 MHz,  $\text{CDCl}_3$ )  $\delta$  24.2. HRMS (EI): m/z:  $[\text{M-BH}_3]^+$  Calcd for  $\text{C}_{20}\text{H}_{25}\text{P}$ : 296.1694, found 296.1691.  $[\alpha]_{\text{D}}^{20}$  = 35.7 ( $c$  = 0.5,  $\text{CHCl}_3$ ).

**3.33 (1*S*,2*S*)-2-([1,1'-biphenyl]-4-ylmethyl)-1-(tert-butyl)-2,3-dihydrophosphindole 1-borane (5f)**

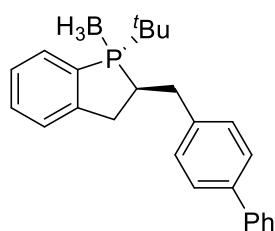

Prepared according to general procedure C from **4f** (2.6 mmol), after a flash column chromatography (hexane : EA = 50:1) afforded the product **5f** as a colorless solid (598 mg, 61% yield). M.p.: 110.0-110.9 °C.  $^1\text{H}$  NMR (400 MHz,  $\text{CDCl}_3$ )  $\delta$  7.75-7.60 (m, 5H), 7.56-7.44 (m, 3H), 7.44-7.34 (m, 4H), 7.32-7.27 (m, 1H), 3.53-3.22 (m, 2H), 3.06 (ddd,  $J$  = 17.1, 7.1, 4.5 Hz, 1H), 3.01-2.86 (m, 1H), 2.81-2.74 (m, 1H), 1.27 (d,  $J$  = 13.7 Hz, 9H), 1.22-0.47 (br., 3H);  $^{13}\text{C}$  NMR (101 MHz,  $\text{CDCl}_3$ )  $\delta$  147.3 (d,  $J_{C-P}$  = 12.4 Hz), 140.9, 139.5 (d,  $J_{C-P}$  = 2.2 Hz), 139.3, 131.5 (d,  $J_{C-P}$  = 2.2 Hz), 130.8 (d,  $J_{C-P}$  = 10.2 Hz), 130.2 (d,  $J_{C-P}$  = 53.0 Hz), 129.4, 128.9, 127.6 (d,  $J_{C-P}$  = 8.8 Hz), 127.4, 127.3, 127.1, 125.8 (d,  $J_{C-P}$  = 7.3 Hz), 38.6, 37.1 (d,  $J_{C-P}$  = 5.3 Hz), 32.6 (d,  $J_{C-P}$  = 31.6 Hz), 30.7 (d,  $J_{C-P}$  = 28.1 Hz), 25.6 (d,  $J_{C-P}$  = 2.2 Hz);  $^{31}\text{P}$  NMR (162 MHz,  $\text{CDCl}_3$ )  $\delta$  64.5. HRMS (EI): m/z:  $[\text{M-BH}_3]^+$  Calcd for  $\text{C}_{25}\text{H}_{27}\text{P}$ : 358.1850, found 358.1848.  $[\alpha]_{\text{D}}^{20}$  = 86.0 ( $c$  = 0.5,  $\text{CHCl}_3$ ).

**3.34 (1*S*,2*S*)-1-(tert-butyl)-2-(4-propylbenzyl)-2,3-dihydrophosphindole 1-borane (5i)**

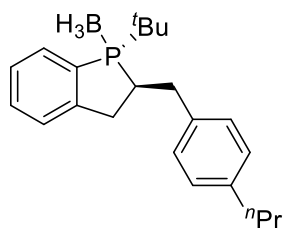

Prepared according to general procedure C from **4i** (0.5 mmol), after a flash column chromatography (hexane : EA = 50:1) afforded the product **5i** as a colorless solid (115 mg, 68% yield). M.p.: 122.0-122.9 °C. <sup>1</sup>H NMR (400 MHz, CDCl<sub>3</sub>) δ 7.67-7.63 (m, 1H), 7.46-7.43 (m, 1H), 7.39-7.34 (m, 1H), 7.28-7.26 (m, 1H), 7.19 (s, 4H), 3.32-3.22 (m, 2H), 3.05-2.97 (m, 1H), 2.86-2.81 (m, 1H), 2.71-2.61 (m, 3H), 1.70 (q, *J* = 7.5 Hz, 2H), 1.24 (d, *J* = 13.6 Hz, 9H), 1.00 (t, *J* = 7.3 Hz, 3H), 1.01-0.37 (br., 3H); <sup>13</sup>C NMR (101 MHz, CDCl<sub>3</sub>) δ 147.4 (d, *J*<sub>C-P</sub> = 12.6 Hz), 140.9, 137.5 (d, *J*<sub>C-P</sub> = 14.4 Hz), 131.4, 130.7 (d, *J*<sub>C-P</sub> = 10.2 Hz), 130.5, 129.9, 128.8 (d, *J*<sub>C-P</sub> = 5.1 Hz), 127.5 (d, *J*<sub>C-P</sub> = 8.8 Hz), 125.7 (d, *J*<sub>C-P</sub> = 7.3 Hz), 38.1 (d, *J*<sub>C-P</sub> = 82.4 Hz), 37.0 (d, *J*<sub>C-P</sub> = 5.3 Hz), 32.6 (d, *J*<sub>C-P</sub> = 31.5 Hz), 30.6 (d, *J*<sub>C-P</sub> = 27.8 Hz), 25.5 (d, *J*<sub>C-P</sub> = 2.2 Hz), 24.6, 13.9, 1.1; <sup>31</sup>P NMR (162 MHz, CDCl<sub>3</sub>) δ 64.1. HRMS (EI): *m/z*: [M-BH<sub>3</sub>]<sup>+</sup> Calcd for C<sub>22</sub>H<sub>29</sub>P: 324.2007, found 324.2002. [α]<sub>D</sub><sup>20</sup> = 54.3 (*c* = 0.5, CHCl<sub>3</sub>).

**3.35 (1*S*,2*R*)-1-(tert-butyl)-2-(4-propylbenzyl)-2,3-dihydrophosphindole 1- borane (5i')**

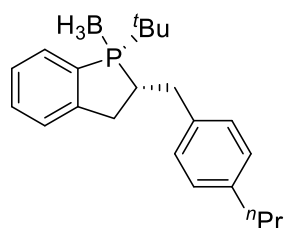

Prepared according to general procedure C from **4i'** (1.6 mmol), after a flash column chromatography (hexane : EA = 50:1) afforded the product **5i'** as a colorless liquid (368 mg, 67% yield). <sup>1</sup>H NMR (400 MHz, CDCl<sub>3</sub>) δ 7.86-7.72 (m, 1H), 7.44-7.35 (m, 2H), 7.27-7.21 (m, 5H), 3.25-3.17 (m, 1H), 3.15-2.95 (m, 2H), 2.64 (t, *J* = 7.7 Hz, 2H), 2.46-2.11 (m, 2H), 1.70 (q, *J* = 7.5 Hz, 2H), 1.22 (d, *J* = 13.7 Hz, 9H), 1.01 (t, *J* = 7.3 Hz, 3H), 1.07-0.41 (br., 3H); <sup>13</sup>C NMR (101 MHz, CDCl<sub>3</sub>) δ 144.4, 142.4 (d, *J*<sub>C-P</sub> = 10.3 Hz), 141.4, 133.9 (d, *J*<sub>C-P</sub> = 13.0 Hz), 130.6 (d, *J*<sub>C-P</sub> = 2.4 Hz), 129.4 (d, *J*<sub>C-P</sub> = 5.9 Hz), 128.8, 126.6 (d, *J*<sub>C-P</sub> = 11.0 Hz), 126.3, 123.5 (d, *J*<sub>C-P</sub> = 47.3 Hz), 39.3 (dd, *J*<sub>C-P</sub> = 104.0, 3.7 Hz), 37.5, 30.0 (d, *J*<sub>C-P</sub> = 31.1 Hz), 26.5 (d, *J*<sub>C-P</sub> = 31.9 Hz), 25.0 (d, *J*<sub>C-P</sub> = 2.5 Hz), 24.5, 13.8, 0.9; <sup>31</sup>P NMR (162 MHz, CDCl<sub>3</sub>) δ 24.1. HRMS (EI): *m/z*: [M-BH<sub>3</sub>]<sup>+</sup> Calcd for C<sub>22</sub>H<sub>29</sub>P: 324.2007, found 324.2004. [α]<sub>D</sub><sup>20</sup> = 13.0 (*c* = 0.5, CHCl<sub>3</sub>).

**3.36 (1*S*,2*S*)-1-(tert-butyl)-2-(3,5-di-tert-butylbenzyl)-2,3-dihydrophosphindole 1-borane (5j)**

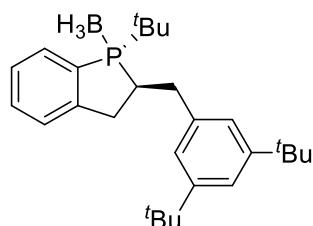

Prepared according to general procedure C from **4j** (1.0 mmol), after a flash column chromatography (hexane : EA = 50:1) afforded the product **5j** as a colorless liquid (322 mg, 79% yield).  $^1\text{H NMR}$  (400 MHz,  $\text{CDCl}_3$ )  $\delta$  7.66 (t,  $J = 6.9$  Hz, 1H), 7.45 (t,  $J = 7.5$  Hz, 1H), 7.41-7.33 (m, 2H), 7.31-7.25 (m, 1H), 7.10 (s, 2H), 3.35-3.27 (m, 2H), 3.15-2.98 (m, 1H), 2.87-2.81 (m, 1H), 2.77-2.69 (m, 1H), 1.47-1.31 (m, 18H), 1.22 (d,  $J = 13.7$  Hz, 9H), 1.17-0.43 (br., 3H);  $^{13}\text{C NMR}$  (101 MHz,  $\text{CDCl}_3$ )  $\delta$  150.9, 147.4 (d,  $J_{\text{C-P}} = 13.0$  Hz), 139.2 (d,  $J_{\text{C-P}} = 13.2$  Hz), 131.3, 130.7 (d,  $J_{\text{C-P}} = 10.2$  Hz), 130.1, 127.4 (d,  $J_{\text{C-P}} = 8.8$  Hz), 125.6 (d,  $J_{\text{C-P}} = 7.3$  Hz), 123.1, 120.3, 38.8, 37.7 (d,  $J_{\text{C-P}} = 5.1$  Hz), 34.8, 32.8 (d,  $J_{\text{C-P}} = 31.1$  Hz), 31.5, 30.5 (d,  $J_{\text{C-P}} = 27.7$  Hz), 25.5 (d,  $J_{\text{C-P}} = 2.5$  Hz);  $^{31}\text{P NMR}$  (162 MHz,  $\text{CDCl}_3$ )  $\delta$  64.5. **HRMS** (EI):  $m/z$ :  $[\text{M-BH}_3]^+$  Calcd for  $\text{C}_{27}\text{H}_{39}\text{P}$ : 394.2789, found 394.2784.  $[\alpha]_{\text{D}}^{20} = 16.0$  ( $c = 0.5$ ,  $\text{CHCl}_3$ ).

**3.37 (1*S*,2*R*)-1-(tert-butyl)-2-(3,5-di-tert-butylbenzyl)-2,3-dihydrophosphindole 1-borane (5j')**

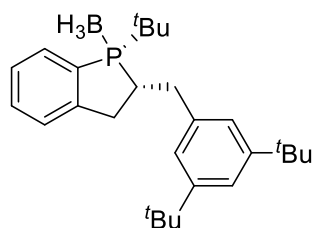

Prepared according to general procedure C from **4j'** (2.0 mmol), after a flash column chromatography (hexane : EA = 50:1) afforded the product **5j'** as a colorless solid (645 mg, 79% yield). M.p.: 103.0-103.9 °C.  $^1\text{H NMR}$  (400 MHz,  $\text{CDCl}_3$ )  $\delta$  7.87-7.76 (m, 1H), 7.49-7.34 (m, 3H), 7.26-7.20 (m, 1H), 7.17-7.12 (m, 2H), 3.27-3.21 (m, 1H), 3.18-2.96 (m, 2H), 2.43-2.33 (m, 1H), 2.29-2.22 (m, 1H), 1.39 (d,  $J = 1.4$  Hz, 18H), 1.23 (dd,  $J = 13.7, 1.3$  Hz, 9H), 1.19-0.41 (br., 3H);  $^{13}\text{C NMR}$  (101 MHz,  $\text{CDCl}_3$ )  $\delta$  151.3, 144.6,

144.4 (d,  $J_{C-P} = 10.2$  Hz), 134.0 (d,  $J_{C-P} = 13.0$  Hz), 130.6 (d,  $J_{C-P} = 2.3$  Hz), 129.5 (d,  $J_{C-P} = 6.3$  Hz), 126.7 (d,  $J_{C-P} = 11.2$  Hz), 123.6 (d,  $J_{C-P} = 47.7$  Hz), 121.1, 120.5, 39.8 (d,  $J_{C-P} = 3.7$  Hz), 34.9, 31.5, 30.1 (d,  $J_{C-P} = 31.0$  Hz), 27.0 (d,  $J_{C-P} = 2.7$  Hz), 26.8 (d,  $J_{C-P} = 31.4$  Hz), 25.2 (d,  $J_{C-P} = 2.3$  Hz);  $^{31}\text{P}$  NMR (162 MHz,  $\text{CDCl}_3$ )  $\delta$  24.2. HRMS (EI):  $m/z$ :  $[\text{M-BH}_3]^+$  Calcd for  $\text{C}_{27}\text{H}_{39}\text{P}$ : 394.2789, found 394.2789.  $[\alpha]_{\text{D}}^{20} = 33.3$  ( $c = 0.5$ ,  $\text{CHCl}_3$ ).

**3.38 (1*S*,2*S*)-1-(tert-butyl)-2-(naphthalen-2-ylmethyl)-2,3-dihydrophosphindole 1-borane (5k)**

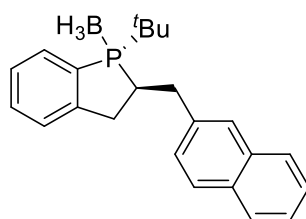

Prepared according to general procedure C from **4k** (3.0 mmol), after a flash column chromatography (hexane : EA = 50:1) afforded the product **5k** as a colorless solid (737 mg, 71% yield). M.p.: 118.0-118.9 °C.  $^1\text{H}$  NMR (400 MHz,  $\text{CDCl}_3$ )  $\delta$  7.89-7.84 (m, 3H), 7.77-7.63 (m, 2H), 7.59-7.34 (m, 5H), 7.26-7.24 (m, 1H), 3.51-3.44 (m, 1H), 3.35-3.17 (m, 1H), 3.08-3.03 (m, 1H), 3.00-2.82 (m, 2H), 1.26 (dd,  $J = 13.8, 2.9$  Hz, 9H), 1.12-0.47 (br., 3H);  $^{13}\text{C}$  NMR (101 MHz,  $\text{CDCl}_3$ )  $\delta$  147.3 (d,  $J_{C-P} = 12.3$  Hz), 137.7 (d,  $J_{C-P} = 14.1$  Hz), 133.6, 132.3, 131.5, 130.8, 130.7, 130.1 (d,  $J_{C-P} = 53.1$  Hz), 128.4, 127.7, 127.6, 127.5, 127.3 (d,  $J_{C-P} = 22.6$  Hz), 126.3, 125.7 (d,  $J_{C-P} = 7.6$  Hz), 125.6, 38.5, 37.6 (d,  $J_{C-P} = 5.5$  Hz), 32.4 (d,  $J_{C-P} = 31.6$  Hz), 30.7 (d,  $J_{C-P} = 27.7$  Hz), 25.5;  $^{31}\text{P}$  NMR (162 MHz,  $\text{C}_6\text{D}_6$ )  $\delta$  64.3. HRMS (EI):  $m/z$ :  $[\text{M-BH}_3]^+$  Calcd for  $\text{C}_{23}\text{H}_{25}\text{P}$ : 332.1694, found 332.1689.  $[\alpha]_{\text{D}}^{20} = 70.9$  ( $c = 0.5$ ,  $\text{CHCl}_3$ ).

**3.39 (1*S*,2*R*)-1-(tert-butyl)-2-(thiophen-2-ylmethyl)-2,3-dihydrophosphindole 1-borane (5l)**

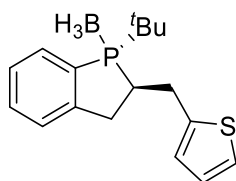

Prepared according to general procedure C from **4l** (2.1 mmol), after a flash column



chromatography (hexane : EA = 50:1) afforded the product **5I** as a colorless solid (470 mg, 75% yield). M.p.: 208.0-208.9 °C. **<sup>1</sup>H NMR** (400 MHz, CDCl<sub>3</sub>) δ 7.69-7.62 (m, 1H), 7.48-7.43 (m, 1H), 7.38-7.34 (m, 1H), 7.32-7.28 (m, 1H), 7.22 (dd, *J* = 5.1, 1.2 Hz, 1H), 7.07-6.98 (m, 1H), 6.91-6.89 (m, 1H), 3.60-3.33 (m, 2H), 3.19-2.93 (m, 2H), 2.84-2.81 (m, 1H), 1.22 (d, *J* = 13.7 Hz, 9H), 1.12-0.37 (br., 3H); **<sup>13</sup>C NMR** (101 MHz, CDCl<sub>3</sub>) δ 147.1 (d, *J* = 12.5 Hz), 143.1 (d, *J*<sub>C-P</sub> = 16.0 Hz), 131.5 (d, *J*<sub>C-P</sub> = 2.2 Hz), 130.7 (d, *J*<sub>C-P</sub> = 10.3 Hz), 129.8 (d, *J*<sub>C-P</sub> = 53.1 Hz), 127.5 (d, *J*<sub>C-P</sub> = 8.9 Hz), 126.9, 125.7 (d, *J*<sub>C-P</sub> = 7.4 Hz), 125.6, 123.9, 38.8, 33.1 (d, *J*<sub>C-P</sub> = 31.3 Hz), 31.9 (d, *J*<sub>C-P</sub> = 6.6 Hz), 30.6 (d, *J*<sub>C-P</sub> = 27.8 Hz), 25.3 (d, *J*<sub>C-P</sub> = 2.2 Hz); **<sup>31</sup>P NMR** (162 MHz, CDCl<sub>3</sub>) δ 64.7. **HRMS** (EI): *m/z*: [M-BH<sub>3</sub>]<sup>+</sup> Calcd for C<sub>17</sub>H<sub>21</sub>PS: 288.1102, found 288.1094. [α]<sub>D</sub><sup>20</sup> = 74.4 (*c* = 0.5, CHCl<sub>3</sub>).

## 4. Gram-scale synthesis of 5c

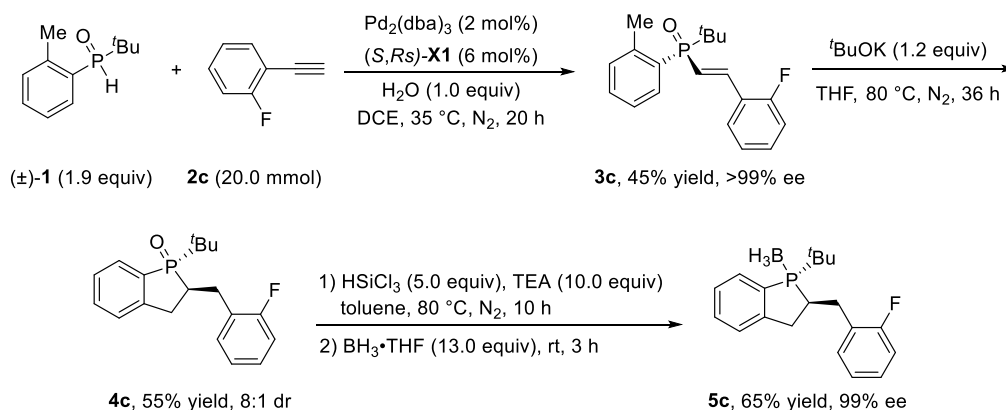

A sealed tube with a magnetic stir bar was charged with  $\text{Pd}_2(\text{dba})_3$  (0.4 mmol), (*S*, *R<sub>S</sub>*)-**X1** (1.2 mmol), racemic SPO (38.0 mmol), alkyne **2c** (20.0 mmol) and water (20.0 mmol). Anhydrous DCE (200.0 ml) was then added as solvent. The reaction tube was sealed, frozen by liquid nitrogen and evacuated under vacuum and backfilled with argon three times through a three-way stopcock. The reaction tube was sealed and allowed to stir at 35°C for 24-36 h. On completion, the reaction mixture was cooled to room temperature, solvent was removed in vacuo and the crude reaction mixture was purified on silica gel using hexanes/ethyl acetate as eluent to afford the desired product **3c** (50% yield, 96% ee). Enantiomerically pure level of **3c** could be easily achieved via the operable recrystallization process in good yield (2.84 g, 45% yield, >99% ee).

A sealed tube equipped with a stir bar under argon atmosphere was charged with **3c** (>99% ee, 9.0 mmol) and *t*BuOK (1.2 equiv). THF (60.0 mL) was added as solvent and then the vial was capped. The reaction mixture was stirred at 80 °C for 20-36 h. On completion, solvent was removed in vacuo and the crude reaction mixture was purified on silica gel using  $\text{CH}_3\text{OH}$ /ethyl acetate as eluent to afford the major isomer **4c** (1.56 g, 55% yield) and minor isomer **4c'** as a colorless solid (195 mg, 7% yield).

To a solution of **4c** (5.0 mmol, 1 equiv), triethylamine (50.0 mmol, 10 equiv) in toluene (50 mL) at rt was added trichlorosilane (25.0 mmol, 5 equiv). The mixture was heated to 80 °C and stirred under nitrogen for 12 h. To the mixture at 0 °C was added  $\text{BH}_3\cdot\text{THF}$  complex (1.0 M, 65.0 mmol), and the resulting mixture was stirred at rt for about 2 h.

Water (60.0 mL) was then added and the aqueous layer was extracted three times with ethyl acetate. The combined organic extracts were dried over Na<sub>2</sub>SO<sub>4</sub> and removed in vacuo and the residue was purified by flash column chromatography on silica gel using hexanes/ethyl acetate as eluent to provide the title phosphine borane adducts **5c** (1.02 g, 65% yield).

### General experimental procedure for synthesis of **M1**:

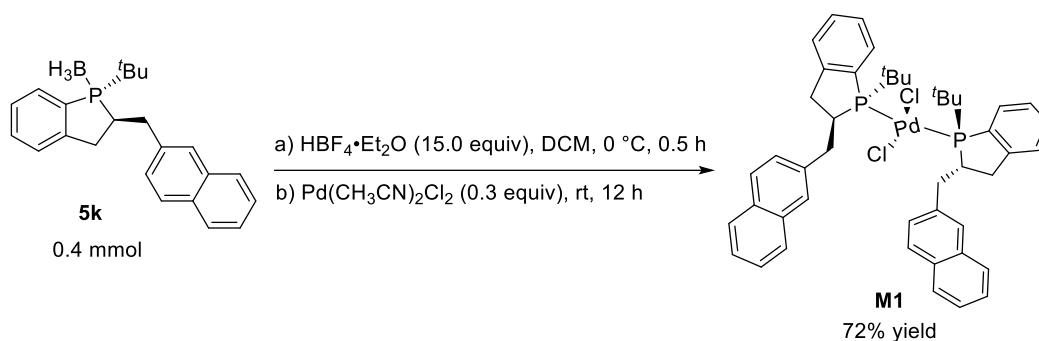

A sealed tube equipped with a stir bar under argon atmosphere was charged with **5k** (>99% ee, 0.4 mmol) and DCM (2.0 mL) was added as solvent and then the vial was capped. The tube was cooled to 0 °C, then HBF<sub>4</sub>·Et<sub>2</sub>O<sup>[3]</sup> (15.0 equiv) was added with a syringe. The reaction mixture was stirred at 0 °C for 0.5 h. On completion, Water (10.0 mL) was then added and the aqueous layer was extracted two times with DCM (2\*2 mL). The combined organic extracts were switched to another tube and Pd(CH<sub>3</sub>CN)<sub>2</sub>Cl<sub>2</sub> (0.3 equiv) was added. The reaction mixture was stirred at rt for 12 h. On completion, Water (10.0 mL) was then added and the aqueous layer was extracted three times with DCM. The combined organic extracts were dried over Na<sub>2</sub>SO<sub>4</sub> and removed in vacuo and the residue was purified by flash column chromatography on silica gel using hexanes/ethyl acetate as eluent to provide the title Pd (II) complex **M1** (73 mg, 72% yield). <sup>1</sup>H NMR (400 MHz, CDCl<sub>3</sub>) δ 8.59-8.34 (m, 1H), 7.83 (ddd, *J* = 14.5, 8.8, 5.4 Hz, 3H), 7.69 (s, 1H), 7.54 (d, *J* = 8.4 Hz, 1H), 7.50-7.39 (m, 3H), 7.34 (t, *J* = 7.6 Hz, 1H), 7.26 (s, 1H), 4.79-4.33 (m, 1H), 3.23 (d, *J* = 12.3 Hz, 1H), 3.04 (t, *J* = 4.9 Hz, 2H), 2.87 (t, *J* = 12.9 Hz, 1H), 1.39 (t, *J* = 7.4 Hz, 9H); <sup>31</sup>P NMR (162 MHz, CDCl<sub>3</sub>) δ 57.4.

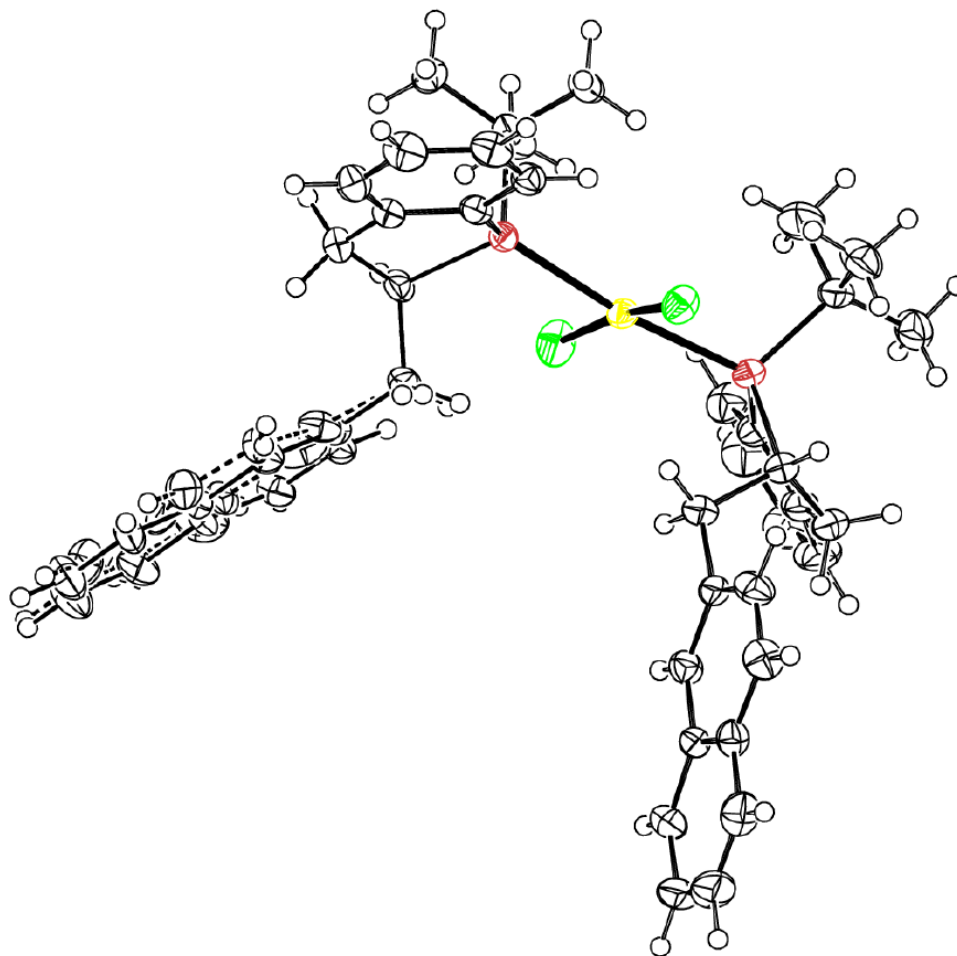

**Figure S1.** ORTEP drawing of **M1** (thermal ellipsoids set at 50% probability).  
Recrystallization from pentane/ $\text{CH}_2\text{Cl}_2$  afforded single crystals suitable for X-ray diffraction analysis, which allowed determination of the absolute configurations of the stereocenters.<sup>[4]</sup>

**Table S4.** Crystal data and structure refinement for ga\_210702f\_a.

|                                   |                                                                   |                    |
|-----------------------------------|-------------------------------------------------------------------|--------------------|
| Identification code               | ga_210702f_a                                                      |                    |
| Empirical formula                 | C <sub>46</sub> H <sub>50</sub> Cl <sub>2</sub> P <sub>2</sub> Pd |                    |
| Formula weight                    | 842.10                                                            |                    |
| Temperature                       | 173(2) K                                                          |                    |
| Wavelength                        | 1.34138 Å                                                         |                    |
| Crystal system                    | Monoclinic                                                        |                    |
| Space group                       | C2                                                                |                    |
| Unit cell dimensions              | a = 24.3145(6) Å                                                  | α = 90 °           |
|                                   | b = 8.8177(2) Å                                                   | β = 106.7980(10) ° |
|                                   | c = 19.6690(5) Å                                                  | γ = 90 °           |
| Volume                            | 4037.05(17) Å <sup>3</sup>                                        |                    |
| Z                                 | 4                                                                 |                    |
| Density (calculated)              | 1.386 Mg/m <sup>3</sup>                                           |                    |
| Absorption coefficient            | 3.970 mm <sup>-1</sup>                                            |                    |
| F(000)                            | 1744                                                              |                    |
| Crystal size                      | 0.180 x 0.090 x 0.090 mm <sup>3</sup>                             |                    |
| Theta range for data collection   | 3.344 to 61.499 °                                                 |                    |
| Index ranges                      | -31 ≤ h ≤ 31, -11 ≤ k ≤ 11, -25 ≤ l ≤ 24                          |                    |
| Reflections collected             | 28300                                                             |                    |
| Independent reflections           | 9324 [R(int) = 0.0485]                                            |                    |
| Completeness to theta = 53.594 °  | 99.8 %                                                            |                    |
| Absorption correction             | Semi-empirical from equivalents                                   |                    |
| Max. and min. transmission        | 0.752 and 0.536                                                   |                    |
| Refinement method                 | Full-matrix least-squares on F <sup>2</sup>                       |                    |
| Data / restraints / parameters    | 9324 / 141 / 557                                                  |                    |
| Goodness-of-fit on F <sup>2</sup> | 1.030                                                             |                    |
| Final R indices [I > 2σ(I)]       | R1 = 0.0305, wR2 = 0.0625                                         |                    |
| R indices (all data)              | R1 = 0.0351, wR2 = 0.0649                                         |                    |
| Absolute structure parameter      | 0.012(5)                                                          |                    |
| Extinction coefficient            | n/a                                                               |                    |
| Largest diff. peak and hole       | 0.369 and -1.029 e.Å <sup>-3</sup>                                |                    |

## General experimental procedure for synthesis of 7, 9, 12:

Synthesis and date of substrate **6**,<sup>[5]</sup> **8**,<sup>[6]</sup> and **10**<sup>[7]</sup> were matched of the reported literature.

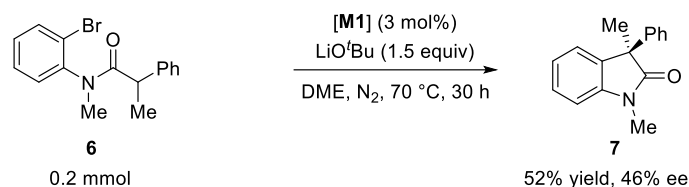

To a sealed tube was added **M1** (3 mol%), LiO<sup>t</sup>Bu (1.5 equiv), **6** (0.2 equiv). The flask was evacuated and refilled with argon and DME (3.0 mL) was added to the tube. The reaction mixture was kept stirring at 70 °C for 30 h. After completion of the reaction (monitored by TLC), the mixture was concentrated in vacuum and the residue was purified by flash column chromatography (hexanes: EA = 10:1) afforded the desired product **7** as a yellow oil (25 mg, 52% yield, 46% ee). <sup>1</sup>H NMR (400 MHz, CDCl<sub>3</sub>) δ 7.44-7.26 (m, 6H), 7.23-7.21 (m, 1H), 7.12 (t, *J* = 7.5 Hz, 1H), 6.95 (d, *J* = 7.8 Hz, 1H), 3.27 (s, 3H), 1.82 (s, 3H); <sup>13</sup>C NMR (101 MHz, CDCl<sub>3</sub>) δ 179.5, 143.3, 140.8, 134.9, 128.5, 128.1, 127.2, 126.7, 124.2, 122.8, 108.3, 52.2, 26.5, 23.9; HRMS (EI): *m/z*: [M]<sup>+</sup> Calcd for C<sub>16</sub>H<sub>15</sub>NO: 237.1154, found 237.1149. HPLC (OD-H, 2-propanol /n-hexane = 1/99, flow rate = 1.0 mL/min, λ = 254 nm) tR = 7.2 min (major), 8.2 min (minor). [α]<sub>D</sub><sup>20</sup> = 96.1 (*c* = 0.5, CHCl<sub>3</sub>).

<Chromatogram>

mAU

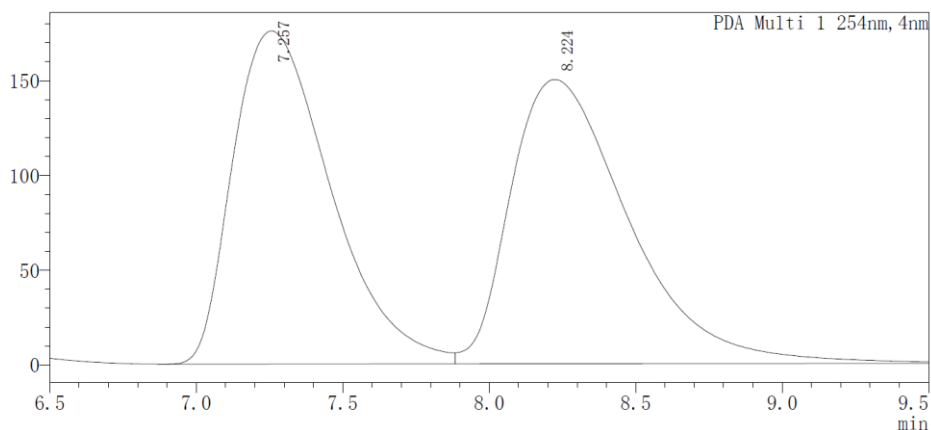

<Peak Table>

PDA Ch1 254nm

| No.   | Ret. Time (min) | Height (mAU) | Height% | Area (mAU*min) | Area%   |
|-------|-----------------|--------------|---------|----------------|---------|
| 1     | 7.257           | 175796       | 53.947  | 4098425        | 49.199  |
| 2     | 8.224           | 150070       | 46.053  | 4231832        | 50.801  |
| Total |                 | 325865       | 100.000 | 8330257        | 100.000 |

<Chromatogram>

mAU

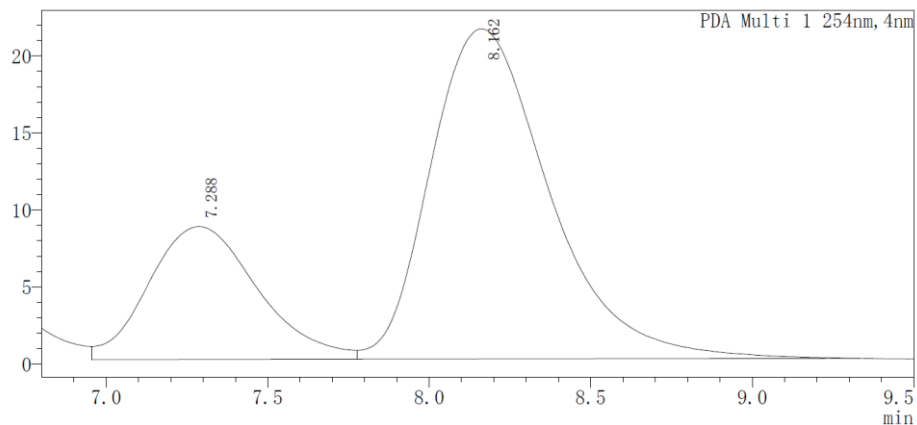

<Peak Table>

PDA Ch1 254nm

| No.   | Ret. Time (min) | Height (mAU) | Height% | Area (mAU*min) | Area%   |
|-------|-----------------|--------------|---------|----------------|---------|
| 1     | 7.288           | 8627         | 28.696  | 202519         | 26.920  |
| 2     | 8.162           | 21438        | 71.304  | 549789         | 73.080  |
| Total |                 | 30065        | 100.000 | 752308         | 100.000 |

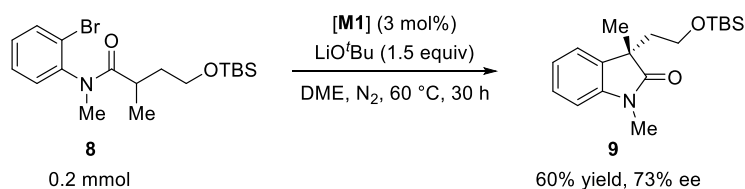

To a sealed tube was added **M1** (3 mol%), LiO<sup>t</sup>Bu (1.5 equiv), **8** (0.2 equiv). The flask was evacuated and refilled with argon and DME (3.0 mL) was added to the tube. The

reaction mixture was kept stirring at 60 °C for 30 h. After completion of the reaction (monitored by TLC), the mixture was concentrated in vacuum and the residue was purified by flash column chromatography (hexanes: EA = 10:1) afforded the desired product **9** as a yellow oil (38 mg, 60% yield, 73% ee). **<sup>1</sup>H NMR** (400 MHz, CDCl<sub>3</sub>) δ 7.38-7.24 (m, 1H), 7.20 (d, *J* = 7.3 Hz, 1H), 7.11-7.01 (m, 1H), 6.84 (d, *J* = 7.8 Hz, 1H), 3.38 (t, *J* = 6.5 Hz, 2H), 3.21 (s, 3H), 2.37-2.18 (m, 1H), 2.02-1.96 (m, 1H), 1.38 (s, 3H), 0.79 (s, 9H), 0.11 (s, 6H); **<sup>13</sup>C NMR** (101 MHz, CDCl<sub>3</sub>) δ 180.5, 143.3, 133.7, 127.6, 122.7, 122.2, 107.9, 59.6, 46.6, 40.4, 26.2, 25.8, 24.8, 18.2. **HRMS** (ESI): *m/z*: [M]<sup>+</sup> Calcd for C<sub>18</sub>H<sub>29</sub>NO<sub>2</sub>Si: 319.1968, found 320.2102. HPLC (OZ-H, 2-propanol /n-hexane = 1/99, flow rate = 0.6 mL/min, λ = 254 nm) t<sub>R</sub> = 13.0 min (major), 15.0 min (minor). [α]<sub>D</sub><sup>20</sup> = -126.1 (*c* = 0.5, CHCl<sub>3</sub>).

<Chromatogram>  
mV

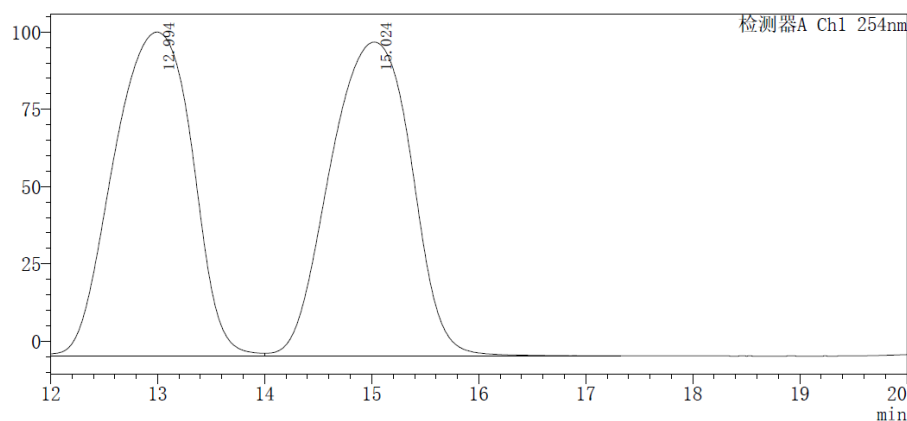

检测器A Ch2 254nm

| No. | Ret. Time (min) | Height (mAU) | Height% | Area (mAU*min) | Area%   |
|-----|-----------------|--------------|---------|----------------|---------|
| 1   | 12.995          | 104745       | 50.783  | 5352005        | 49.978  |
| 2   | 15.027          | 101513       | 49.217  | 5356795        | 50.022  |
| 总计  |                 | 206259       | 100.000 | 10708800       | 100.000 |



<Chromatogram>

mV

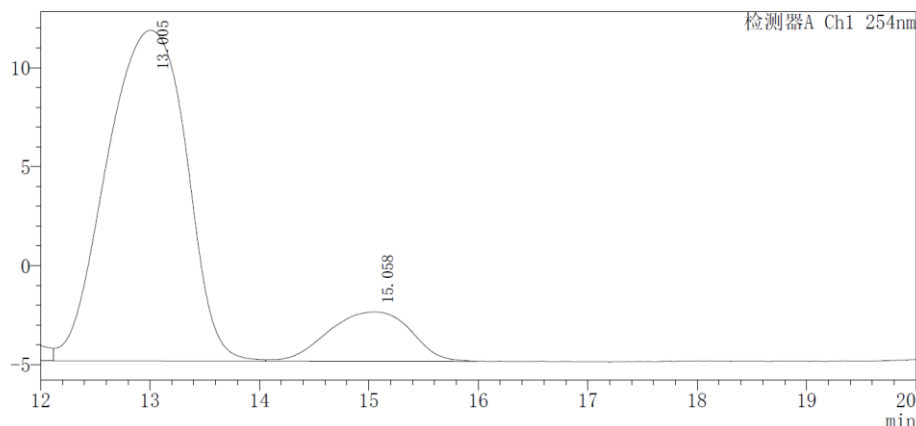

检测器A Ch2 254nm

| No. | Ret. Time (min) | Height (mAU) | Height% | Area (mAU*min) | Area%   |
|-----|-----------------|--------------|---------|----------------|---------|
| 1   | 13.010          | 16713        | 86.981  | 846123         | 86.579  |
| 2   | 15.066          | 2501         | 13.019  | 131162         | 13.421  |
| 总计  |                 | 19215        | 100.000 | 977285         | 100.000 |

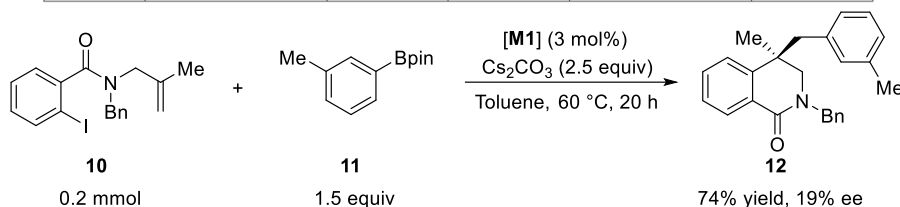

To a sealed tube was added **M1** (3 mol%), Cs<sub>2</sub>CO<sub>3</sub> (2.5 equiv), **11** (1.5 equiv), *N*-allyl carboxamide **10** (0.2 mmol). The flask was evacuated and refilled with argon and toluene (2.0 mL) was added to the tube. The reaction mixture was kept stirring at 60 °C for 20 h. After completion of the reaction (monitored by TLC), the mixture was concentrated in vacuum and the residue was purified by flash column chromatography (hexanes: EA = 10:1) afforded the desired product **12** as a yellow oil (52 mg, 74% yield, 19% ee). <sup>1</sup>H NMR (400 MHz, CDCl<sub>3</sub>) δ 8.28 (dd, *J* = 5.6, 3.3 Hz, 1H), 7.46-7.26 (m, 7H), 7.13-7.01 (m, 2H), 6.98-6.90 (m, 1H), 6.57-6.55 (m, 2H), 5.02 (d, *J* = 14.4 Hz, 1H), 4.72 (d, *J* = 14.4 Hz, 1H), 3.41 (d, *J* = 12.6 Hz, 1H), 3.14 (d, *J* = 12.6 Hz, 1H), 2.85 (d, *J* = 13.2 Hz, 1H), 2.62 (d, *J* = 13.2 Hz, 1H), 2.26 (s, 3H), 1.24 (s, 3H); <sup>13</sup>C NMR (101 MHz, CDCl<sub>3</sub>) δ 164.4, 145.0, 137.2, 136.9, 136.7, 131.5, 131.4, 128.7, 128.6, 128.6, 128.1, 127.6, 127.5, 127.5, 127.1, 126.9, 124.9, 55.6, 50.9, 45.8, 37.9, 22.0, 21.3. HRMS (ED): *m/z*: [M]<sup>+</sup> Calcd for C<sub>25</sub>H<sub>25</sub>NO: 355.1936, found 355.1935. HPLC

(AD-H, 2-propanol /n-hexane = 10/90, flow rate = 1.0 mL/min, l = 254 nm) tR = 12.1 min (major), 32.1 min (minor).  $[\alpha]_D^{20} = -86.1$  ( $c = 0.5$ ,  $\text{CHCl}_3$ ).

<Chromatogram>

mAU

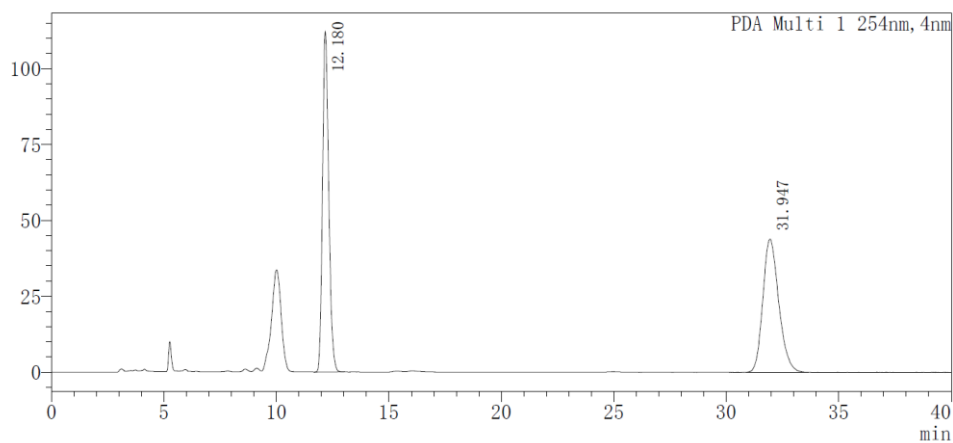

<Peak Table>

PDA Ch1 254nm

| No.   | Ret. Time (min) | Height (mAU) | Height% | Area (mAU*min) | Area%   |
|-------|-----------------|--------------|---------|----------------|---------|
| 1     | 12.180          | 112087       | 71.869  | 2156377        | 50.042  |
| 2     | 31.947          | 43873        | 28.131  | 2152736        | 49.958  |
| Total |                 | 155959       | 100.000 | 4309112        | 100.000 |

mV

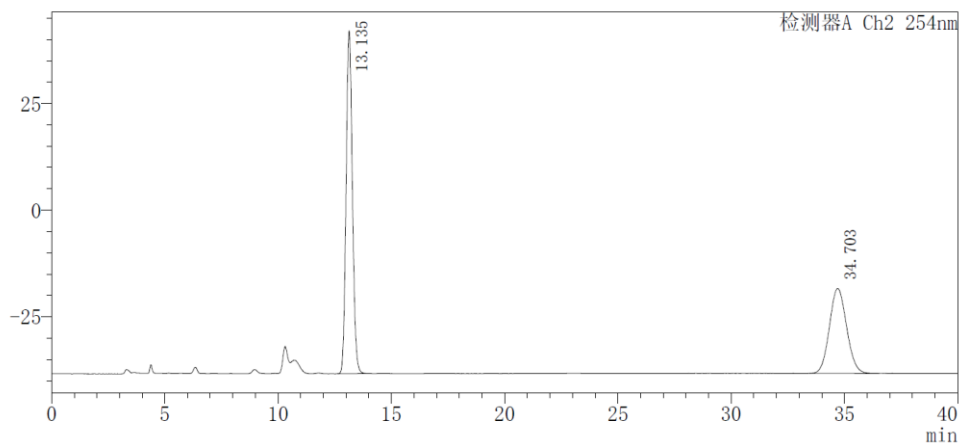

检测器A Ch2 254nm

| 峰号 | 保留时间   | 面积      | 高度     | 浓度     | 浓度单位 | 标记 | 化合物名 |
|----|--------|---------|--------|--------|------|----|------|
| 1  | 13.135 | 1554009 | 80374  | 59.631 |      | V  |      |
| 2  | 34.703 | 1052032 | 19934  | 40.369 |      | S  |      |
| 总计 |        | 2606041 | 100307 |        |      |    |      |

## Reference:

- [1] Q. Dai, L. Liu, Y. Qian, W. Li, J. Zhang, *Angew. Chem. Int. Ed.* **2020**, *59*, 2.
- [2] W. Tang, B. Qu, A. G. Capacci, S. Rodriguez, X. Wei, N. Haddad, B. Narayanan, S. Ma, N. Grinberg, N. K. Yee, D. Krishnamurthy, C. H. Senanayake, *Org. Lett.* **2010**, *12*, 176.
- [3] R. Huber, A. Passera, E. Gubler, A. Mezzetti, *Adv. Synth. Catal.* **2018**, *360*, 2900.
- [4] CCDC 2123418 (**M1**) contains the supplementary crystallographic data for this paper. These data can be obtained free of charge from The Cambridge Crystallographic Data Centre.
- [5] (a) S. Lee, J. F. Hartwig, *J. Org. Chem.* **2001**, *66*, 3402; (b) E. P. Kündig, T. M. Seidel, Y. Jia, G. Bernardinelli, *Angew. Chem.* **2007**, *119*, 8636.
- [6] T. Y. Zhang, H. Zhang, *Tetrahedron Letters* **2002**, *43*, 1363.
- [7] Q. Chen, S. Li, X. Xie, H. Guo, J. Yang, J. Zhang, *Org. Lett.* **2021**, *23*, 4099.

## 6. NMR spectra of products:

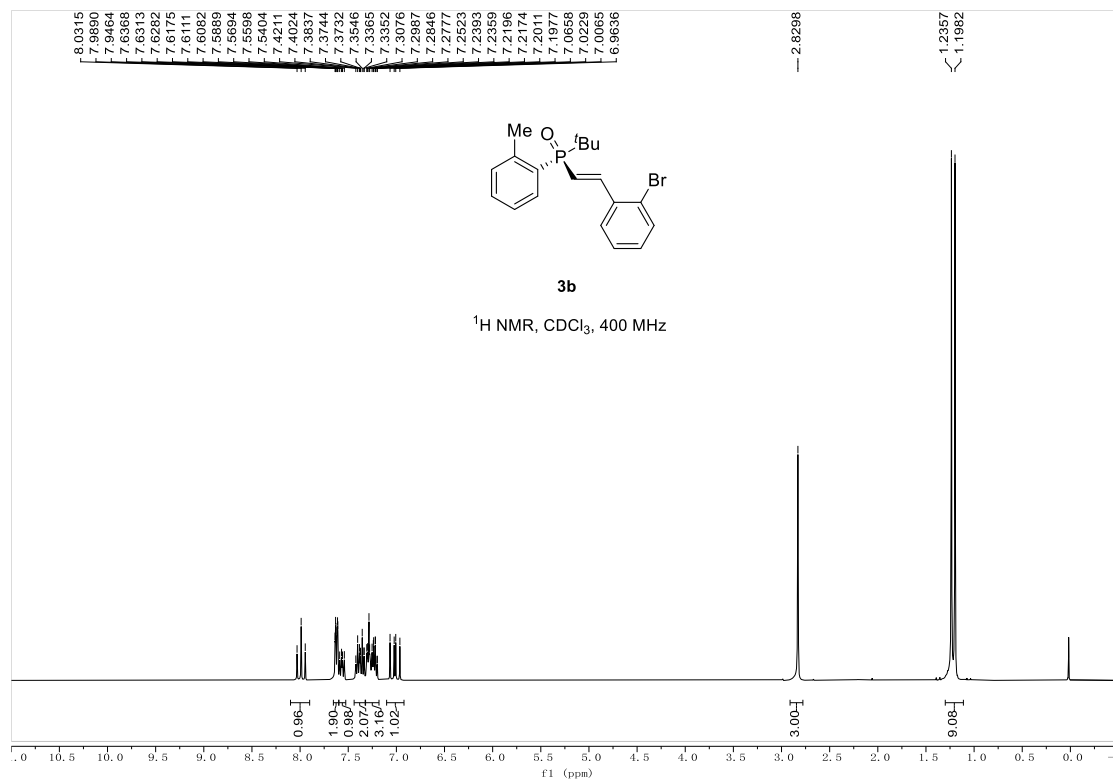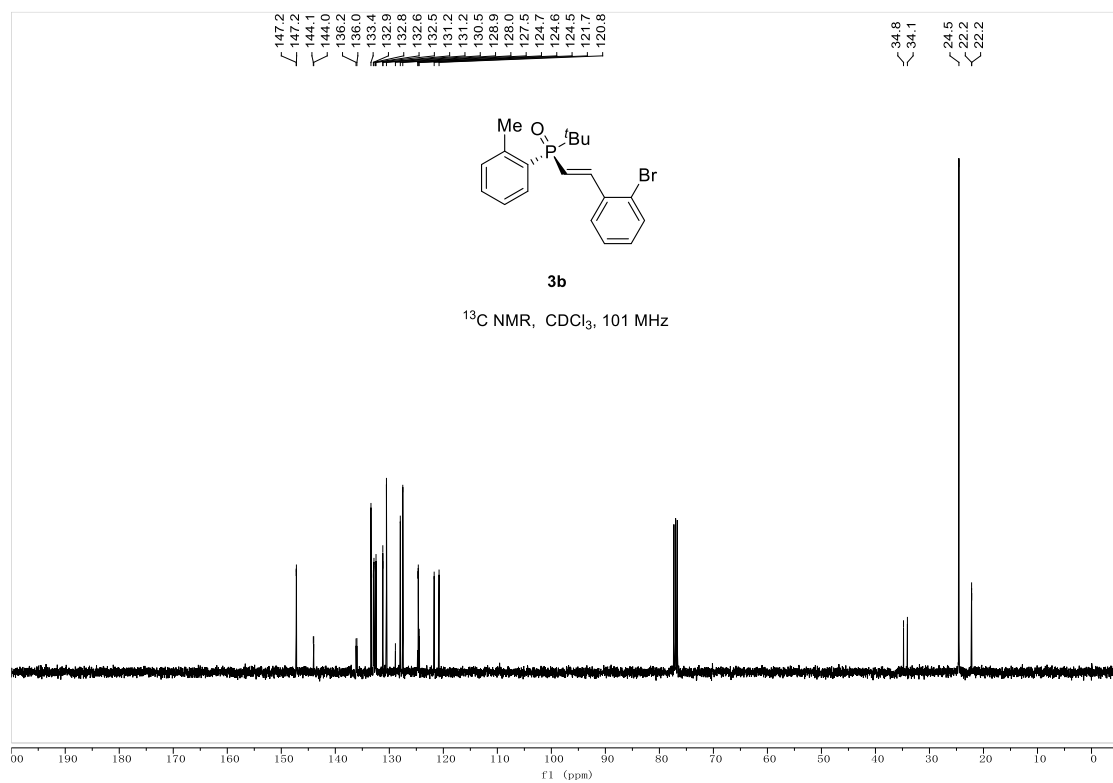

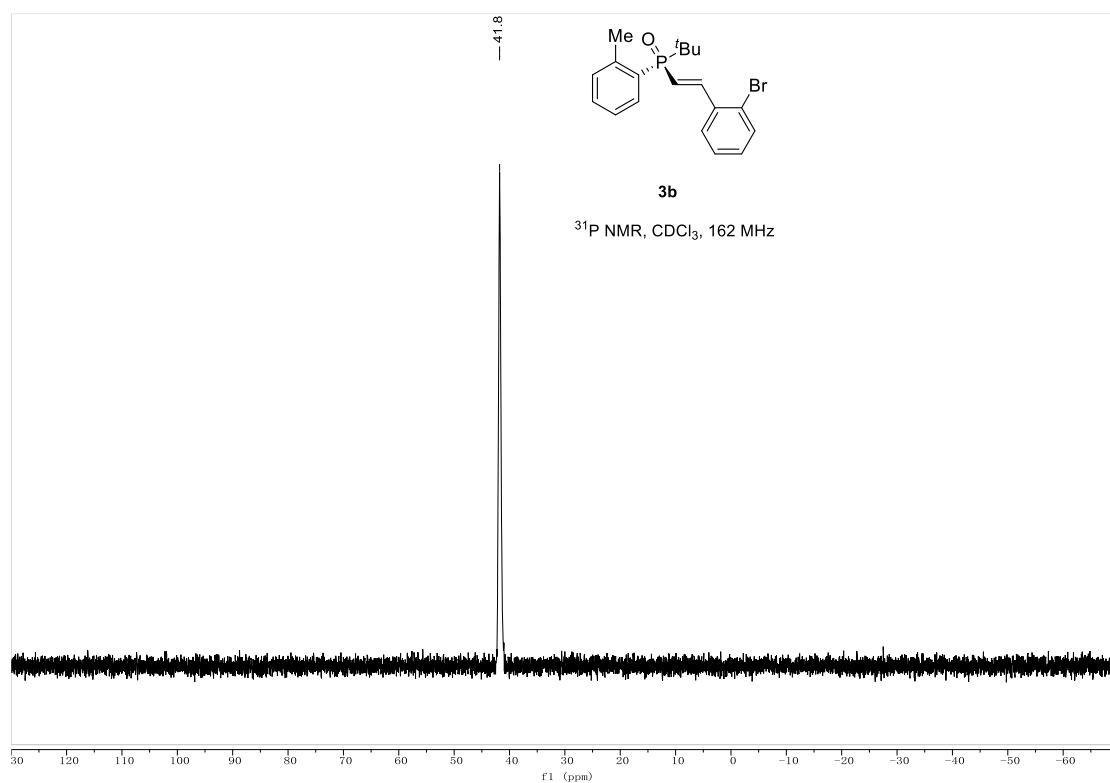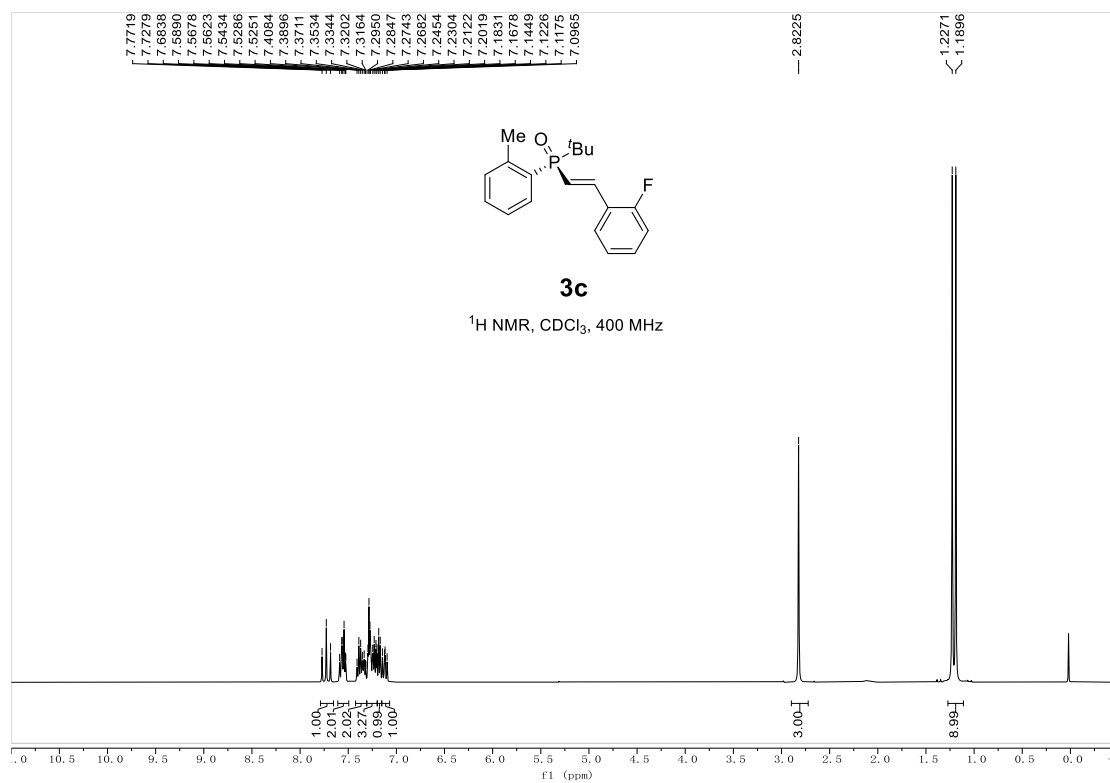

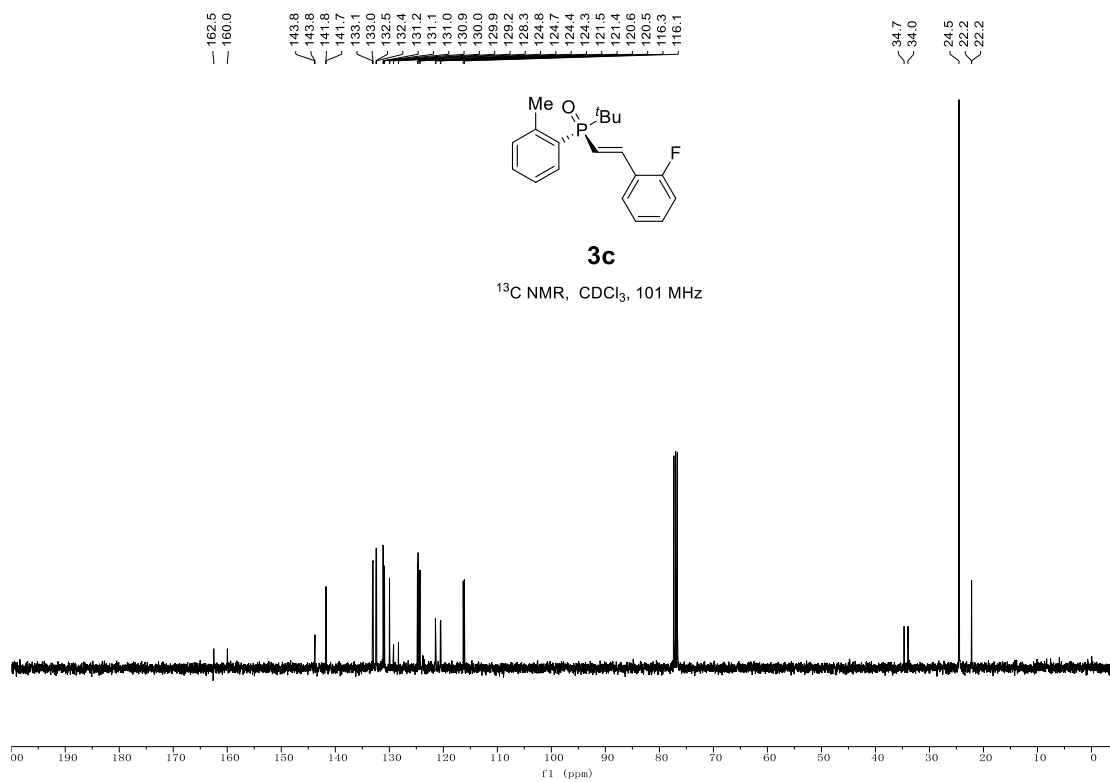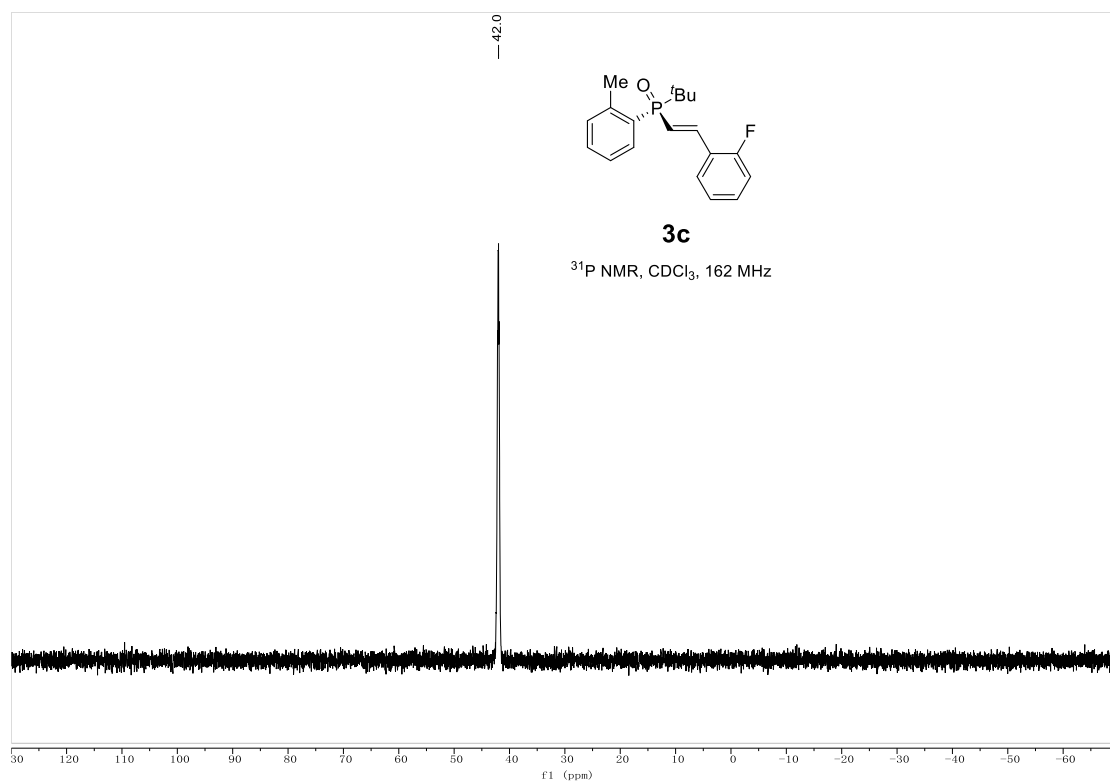

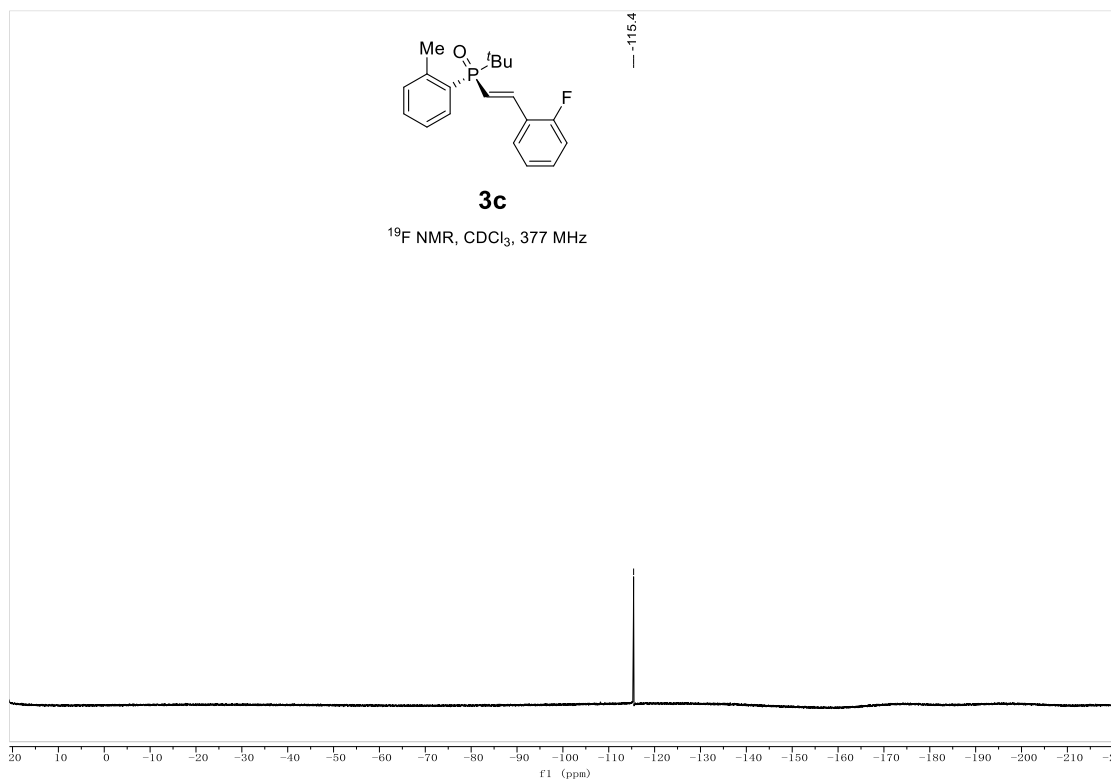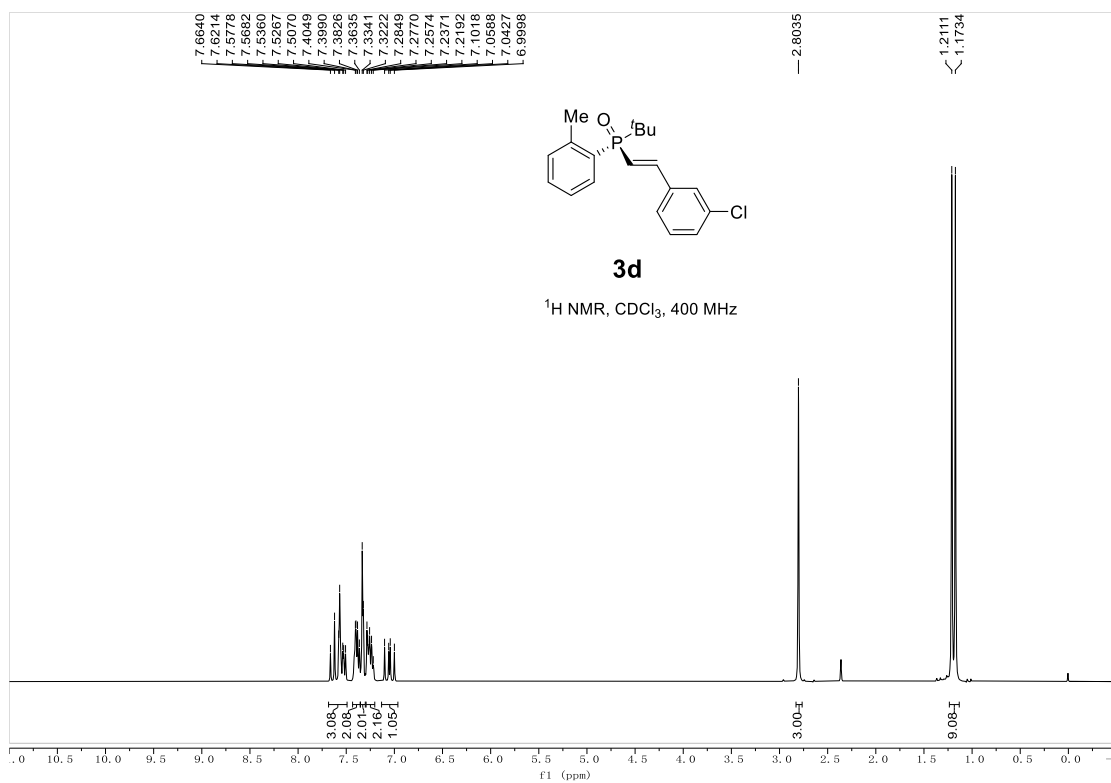

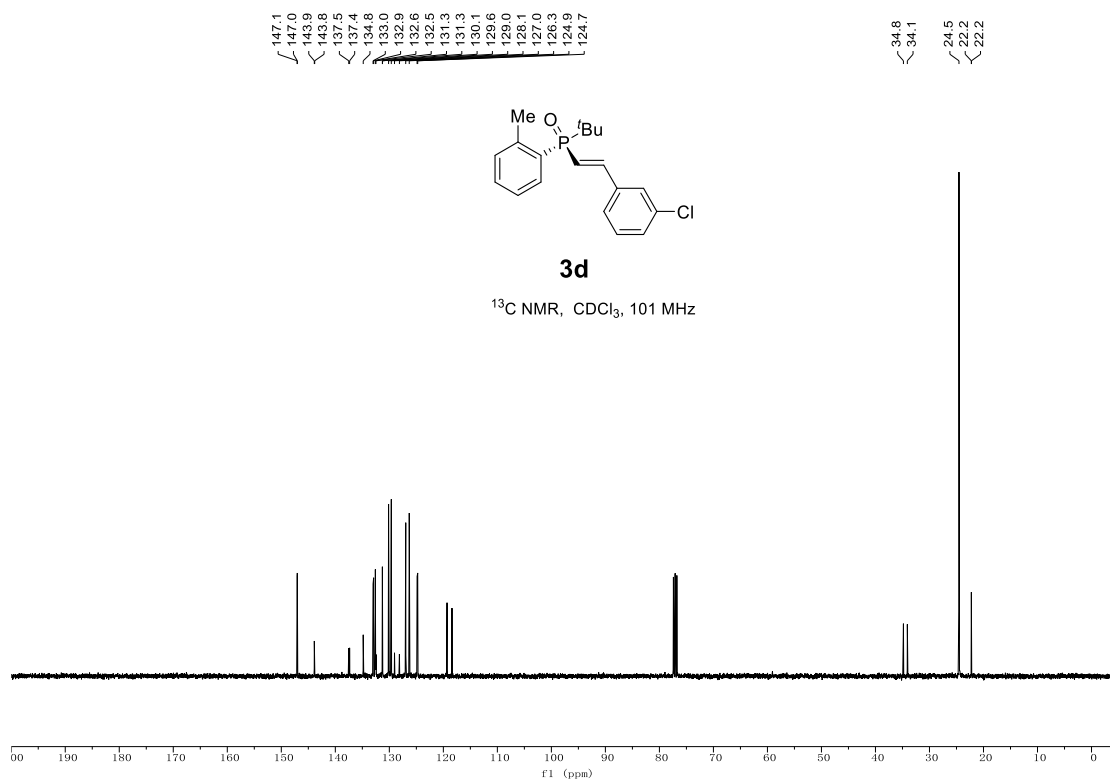



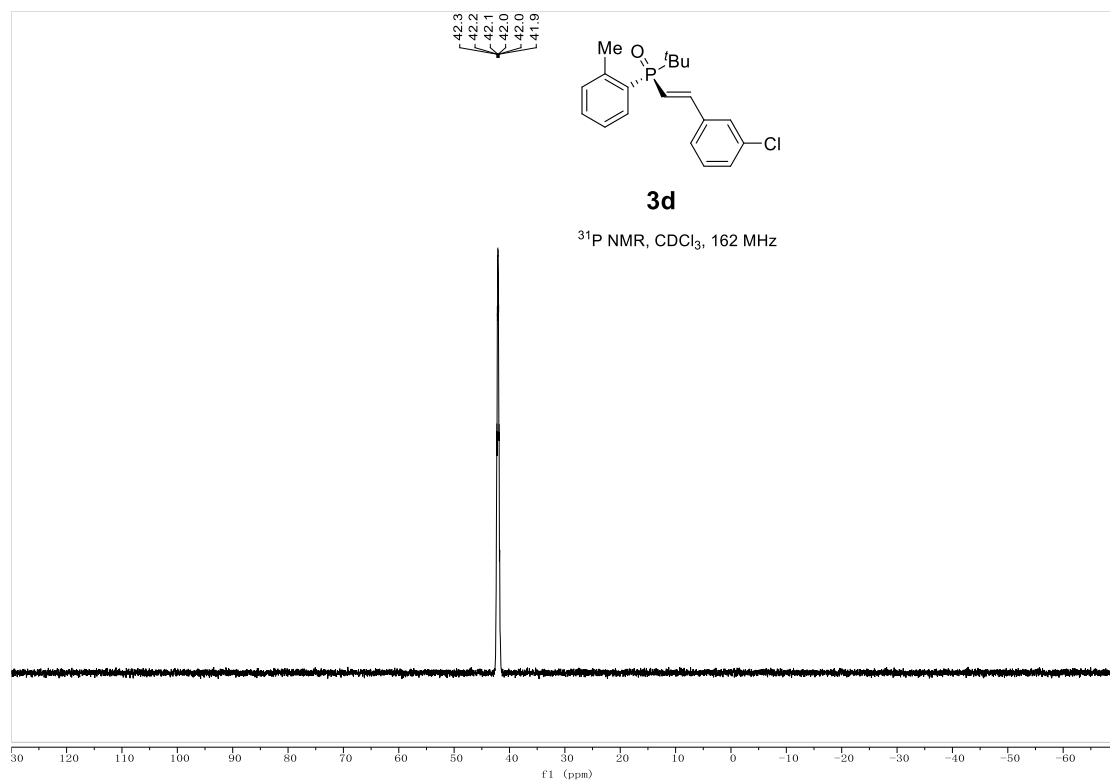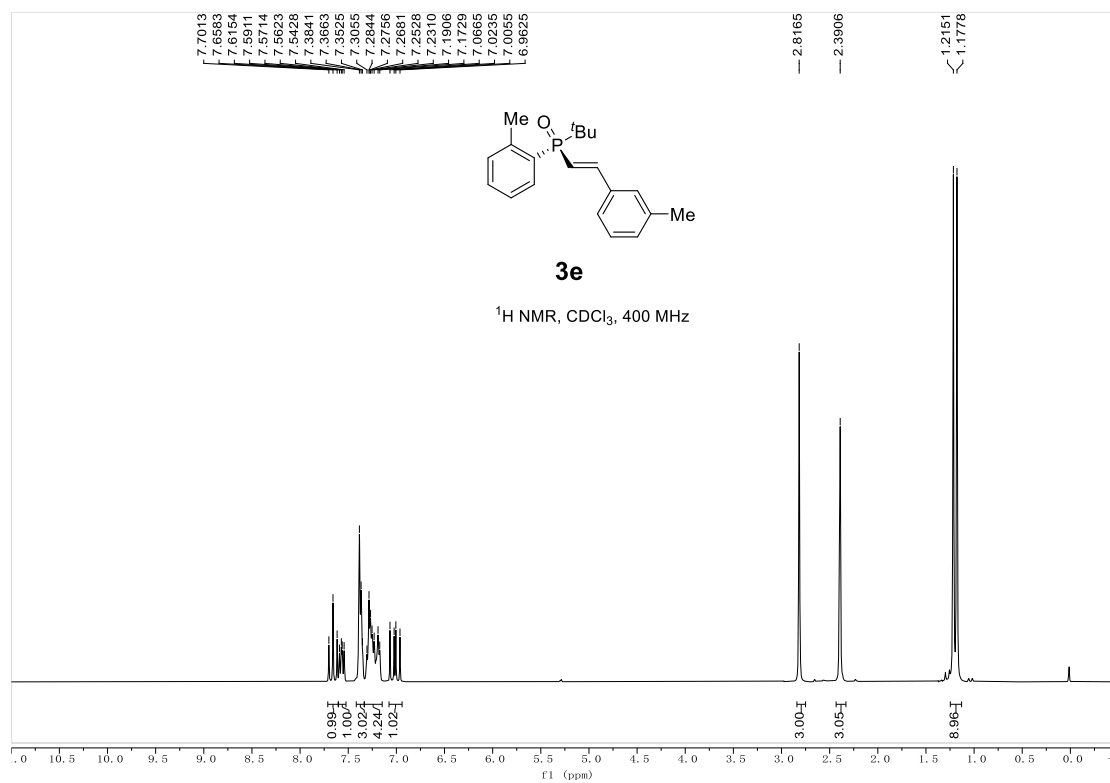

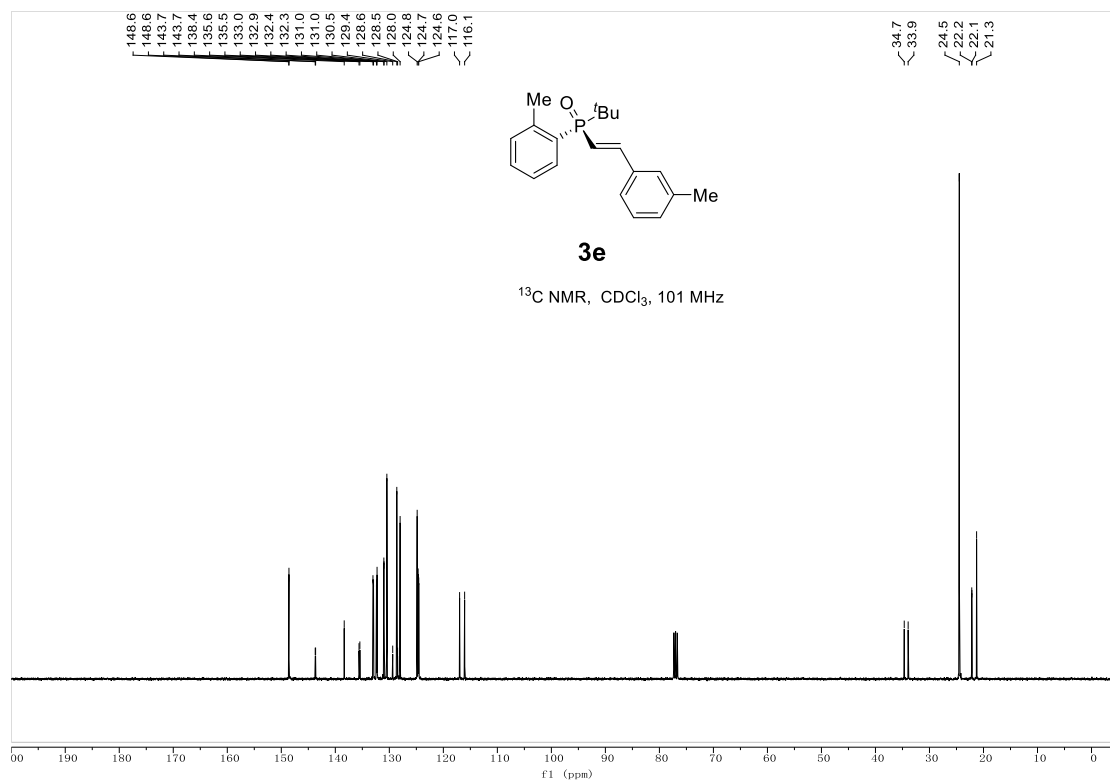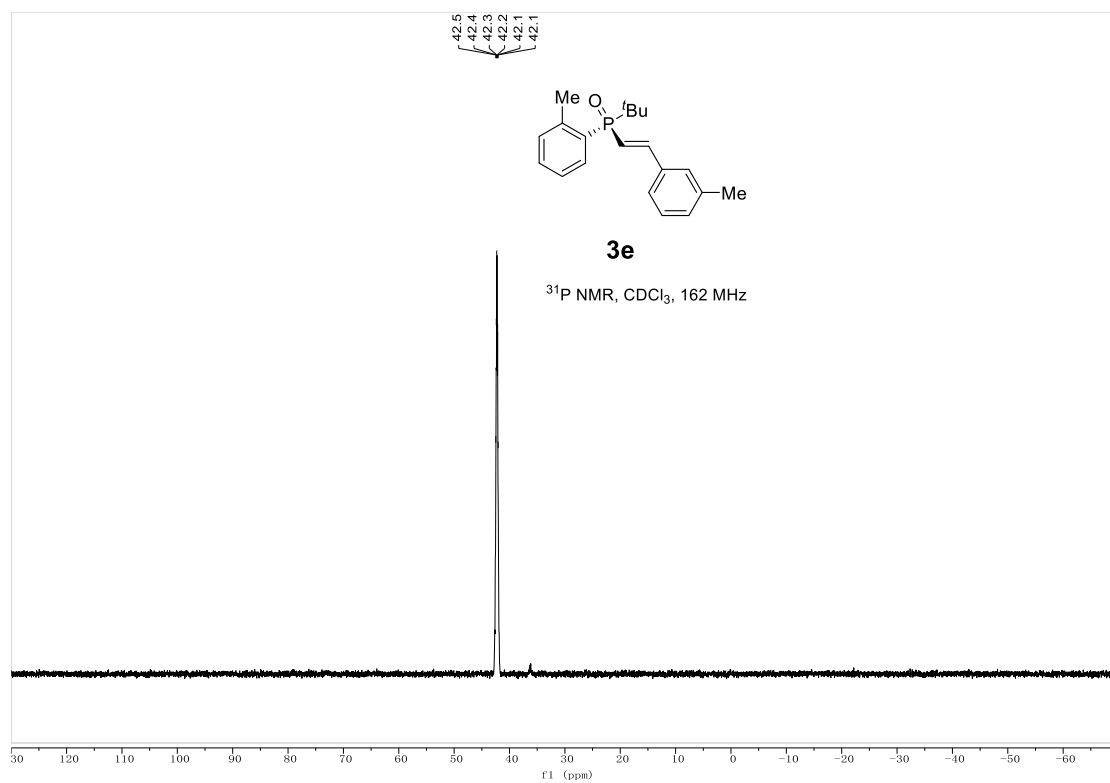

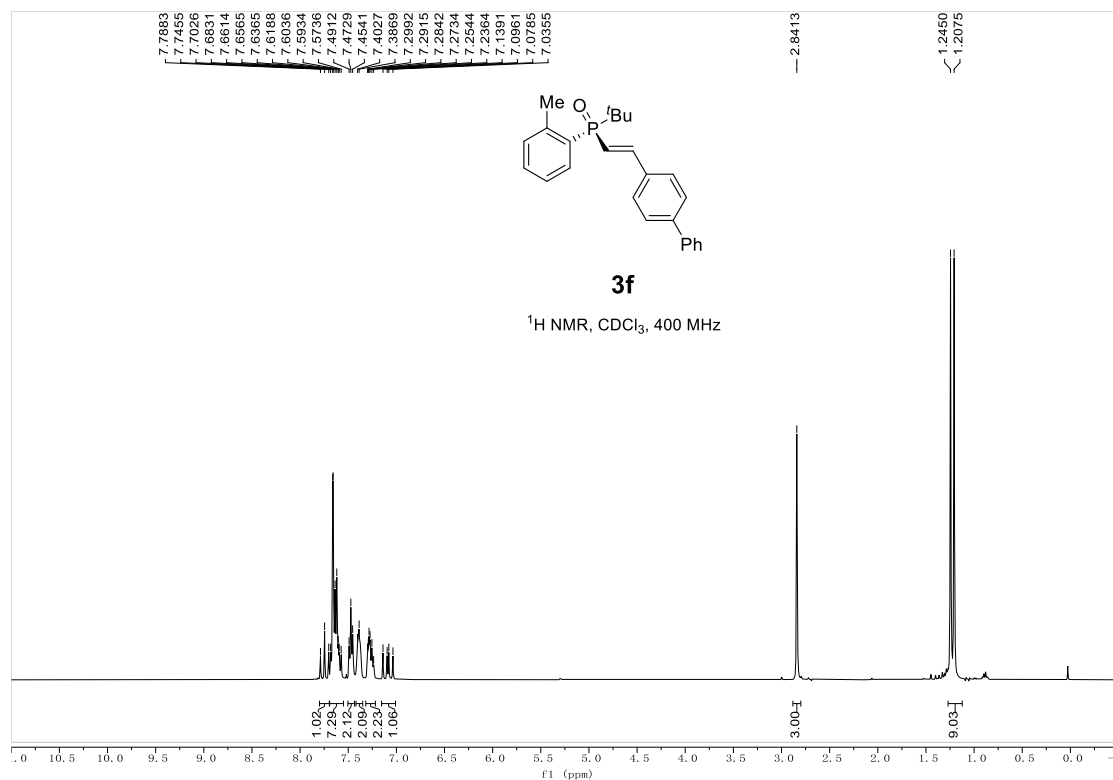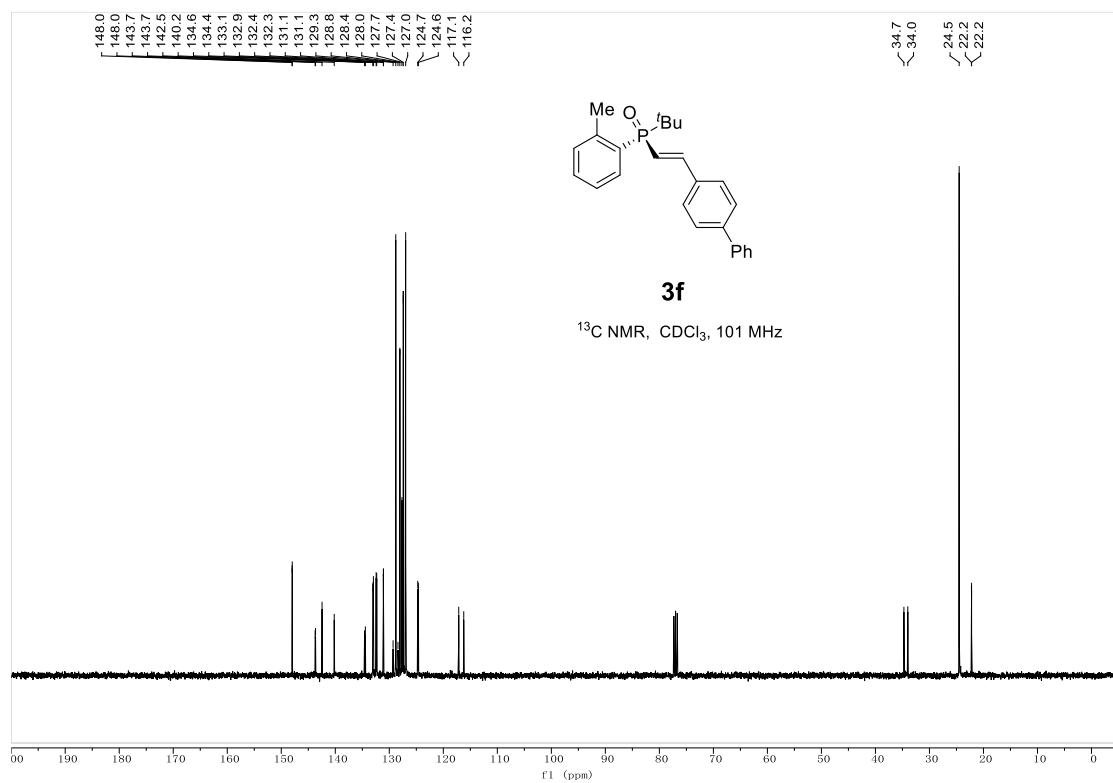

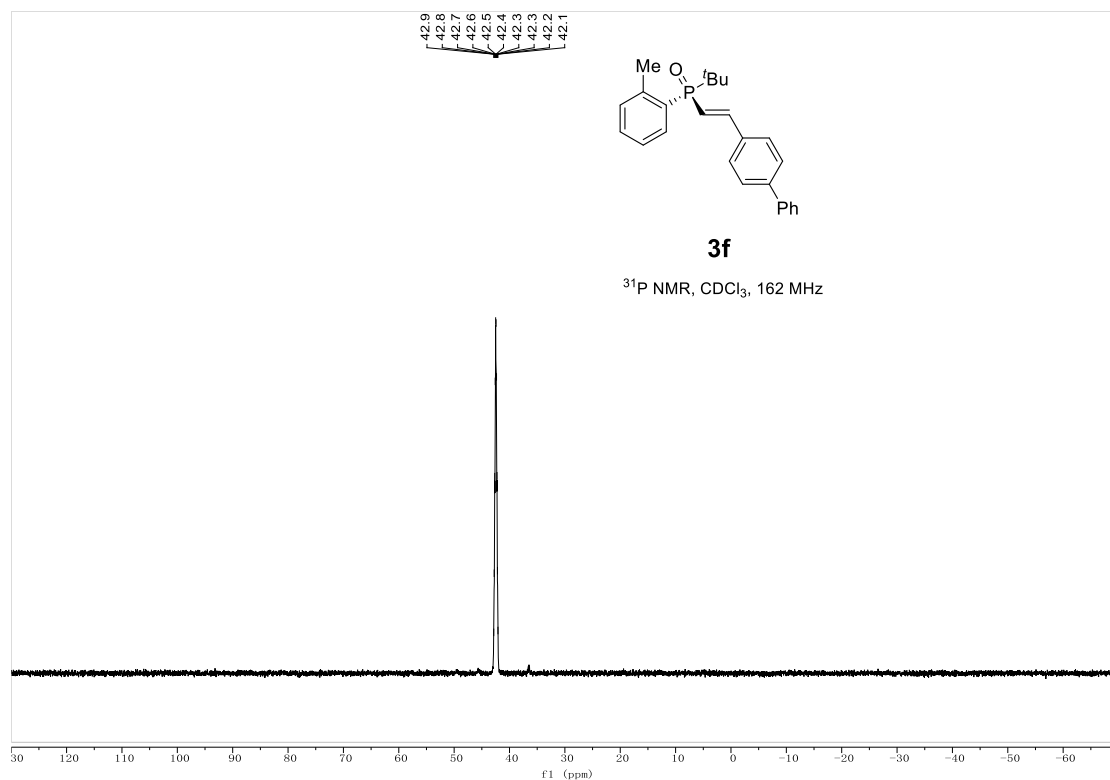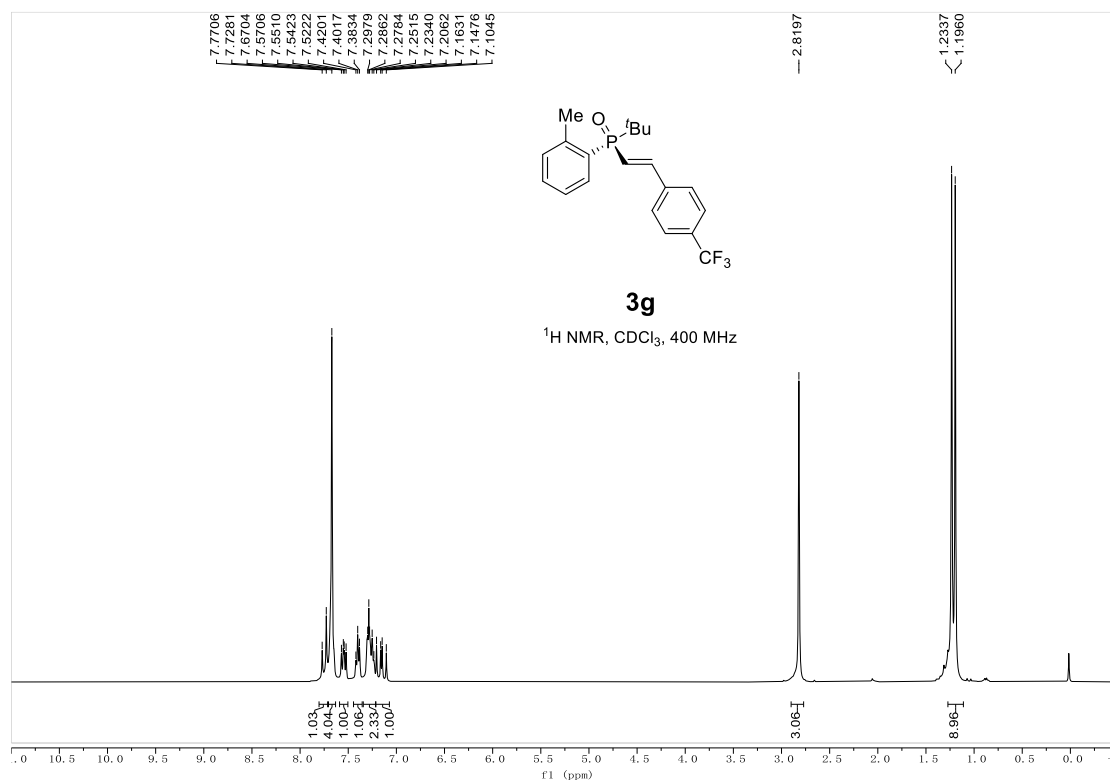

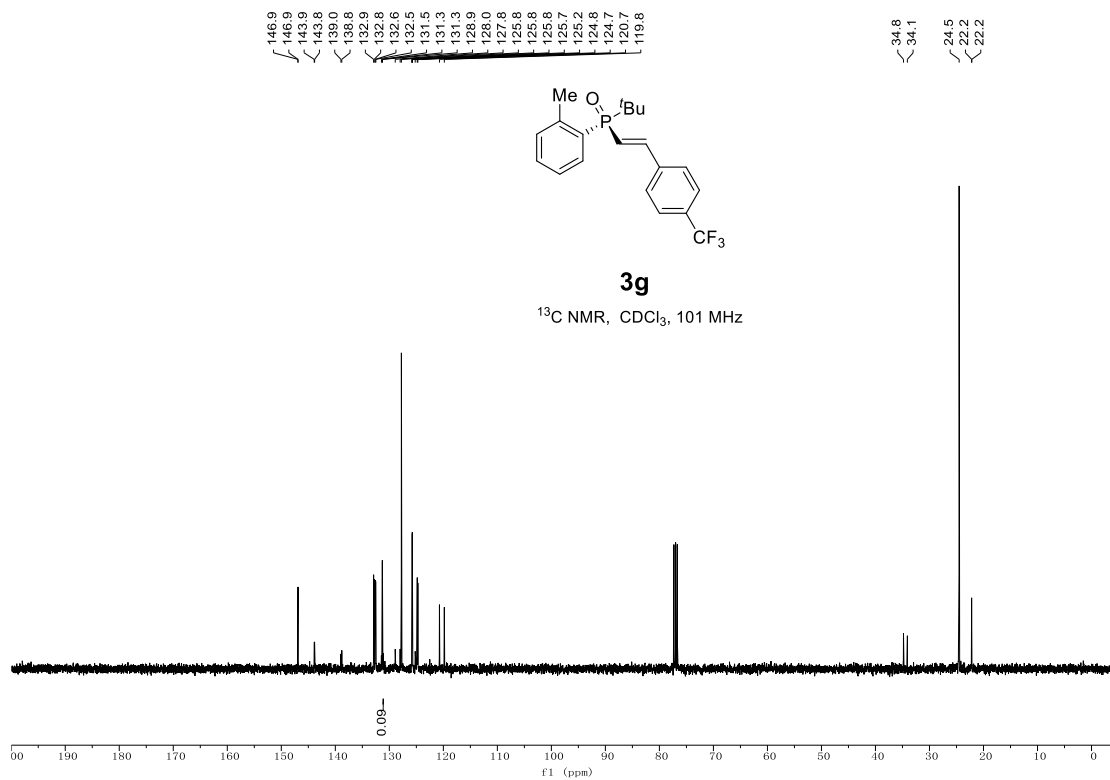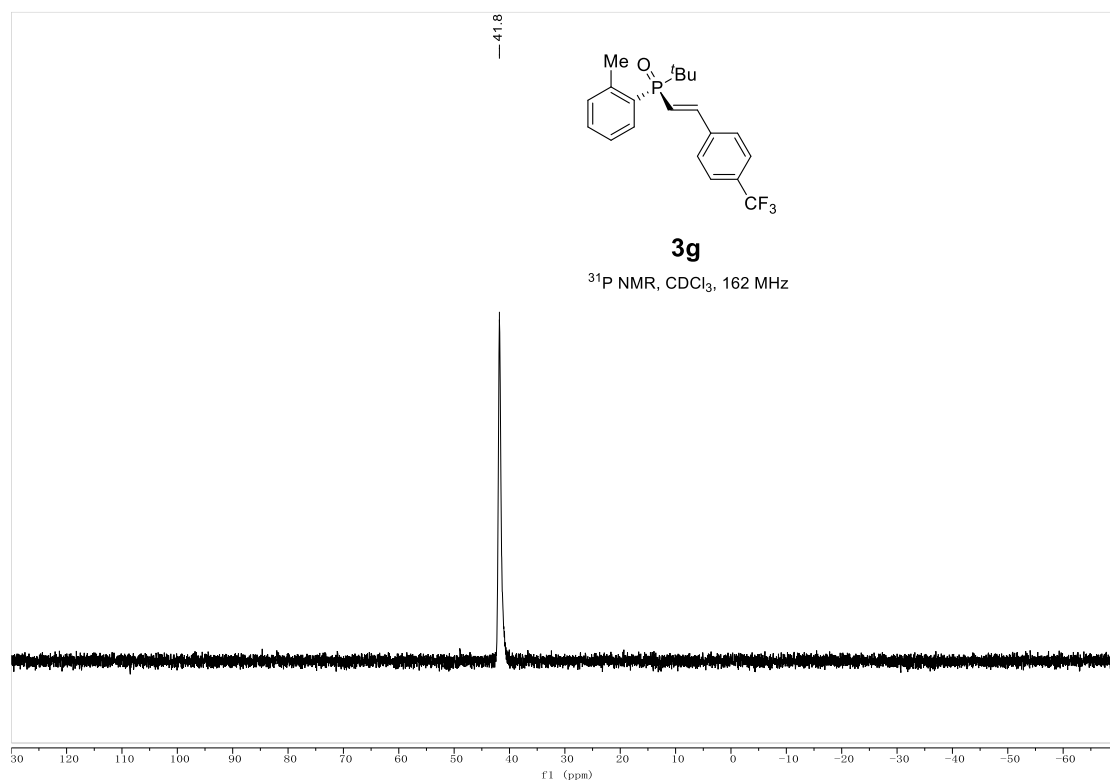

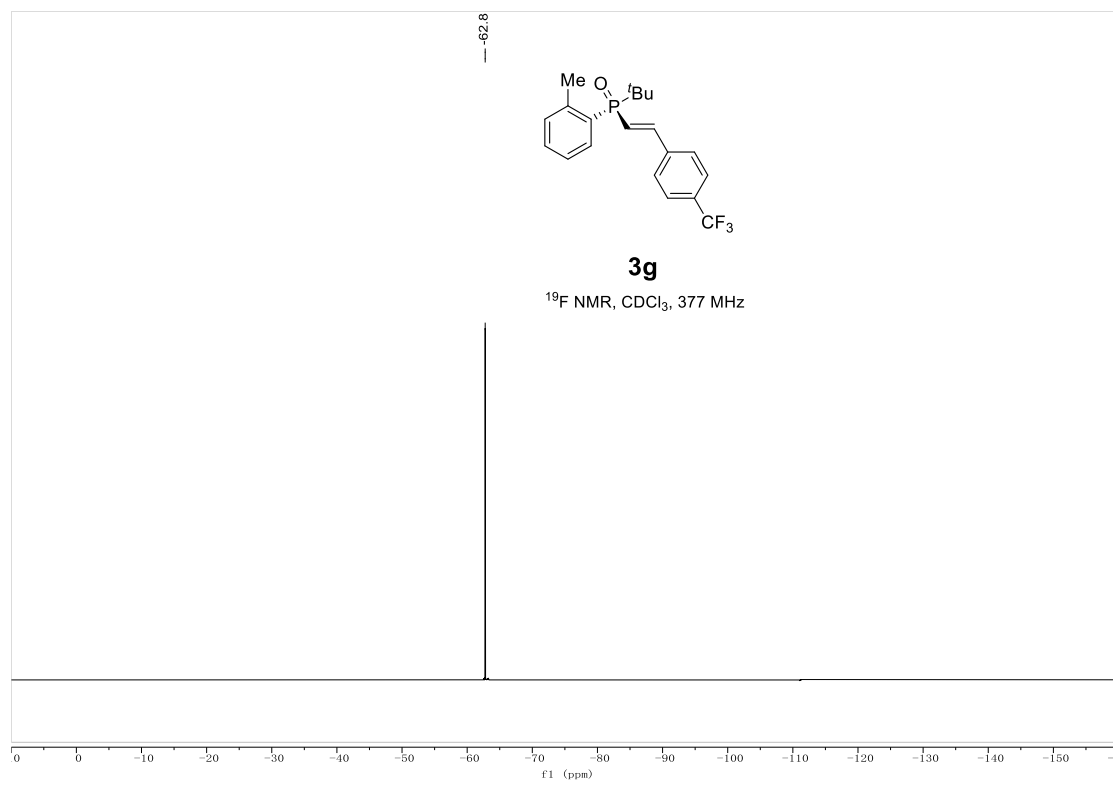

7.6637  
 7.6206  
 7.5961  
 7.5925  
 7.5772  
 7.5731  
 7.5666  
 7.5632  
 7.5480  
 7.5422  
 7.5365  
 7.5232  
 7.5211  
 7.5123  
 7.3969  
 7.3927  
 7.3813  
 7.3775  
 7.3737  
 7.3627  
 7.3589  
 7.3550  
 7.2845  
 7.2746  
 7.2654  
 7.2640  
 7.2576  
 7.2552  
 7.2530  
 7.2393  
 7.2342  
 7.2300  
 7.2209  
 7.2155  
 6.9484  
 6.9410  
 6.9357  
 6.9239  
 6.9172  
 6.9146  
 6.8980  
 6.8498  
 6.8069  
 6.8025

2.8155  
 2.8120  
 1.2163  
 1.1781

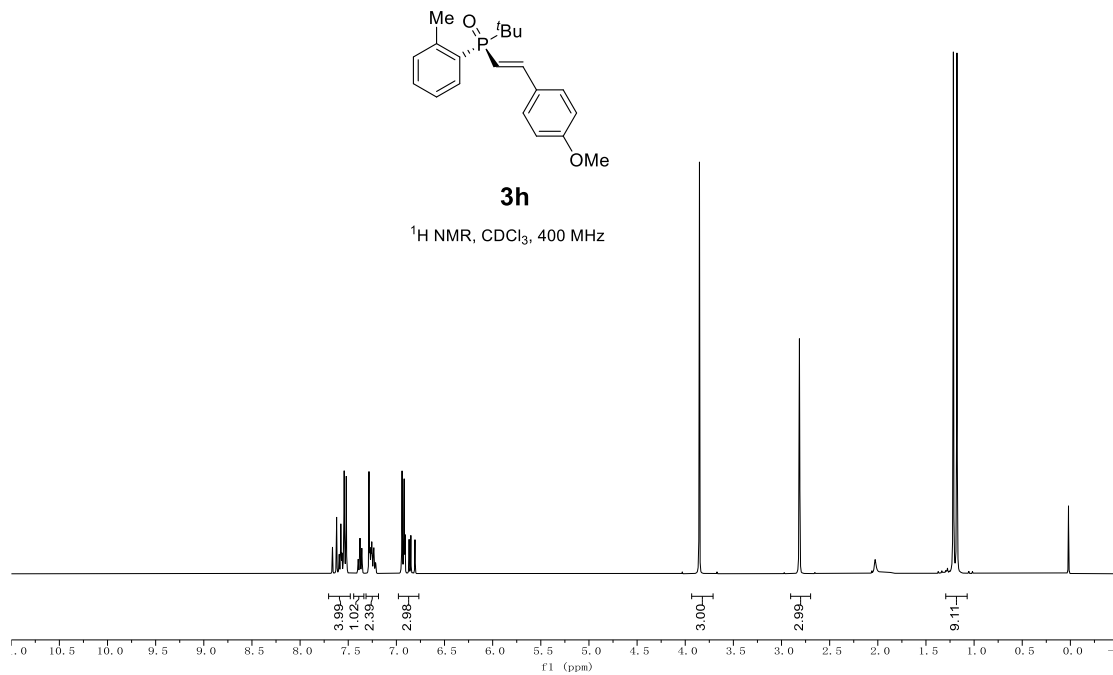

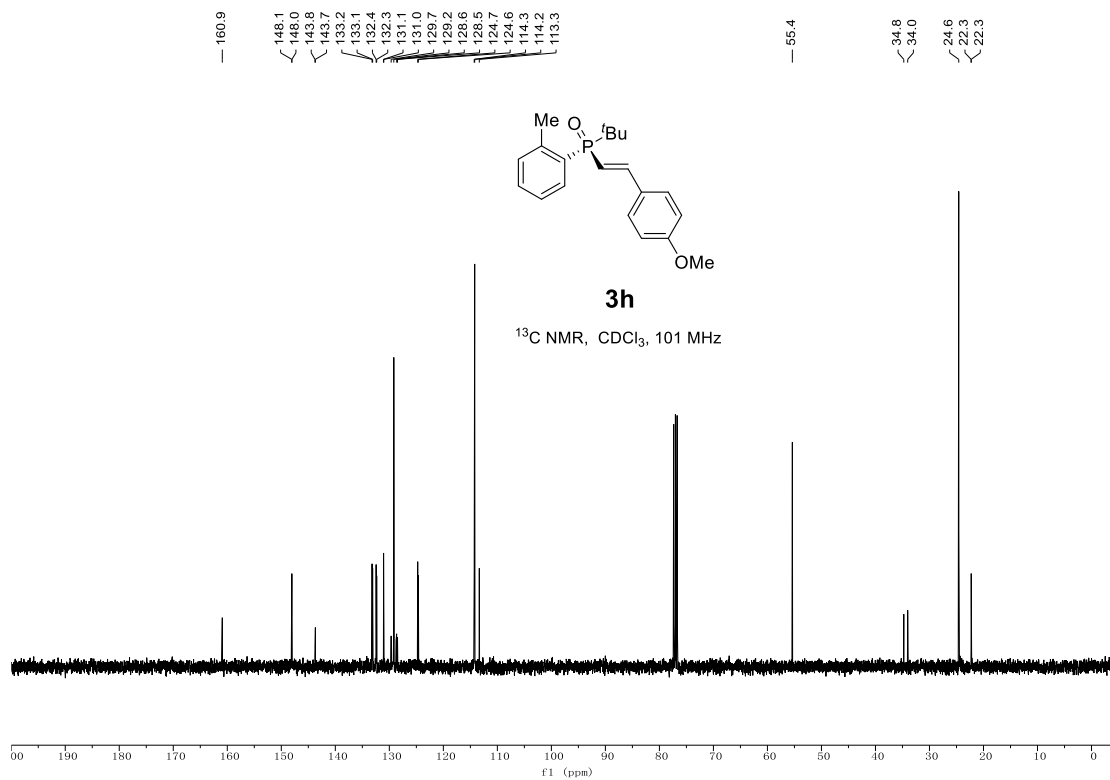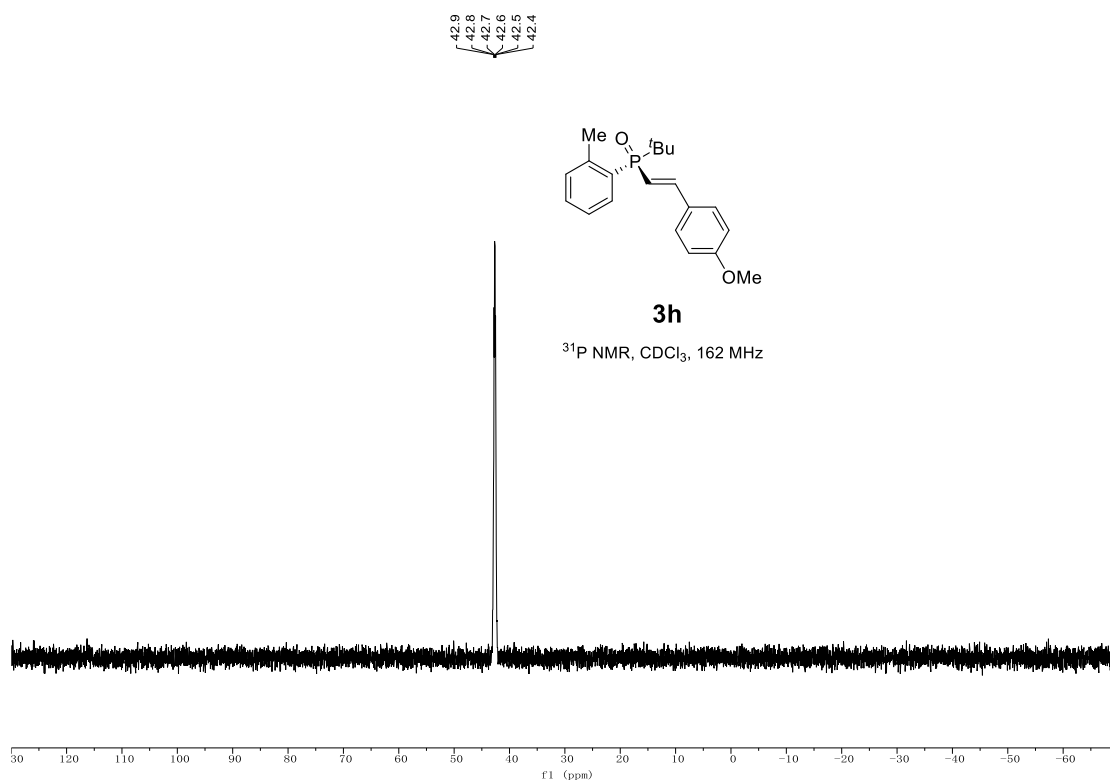

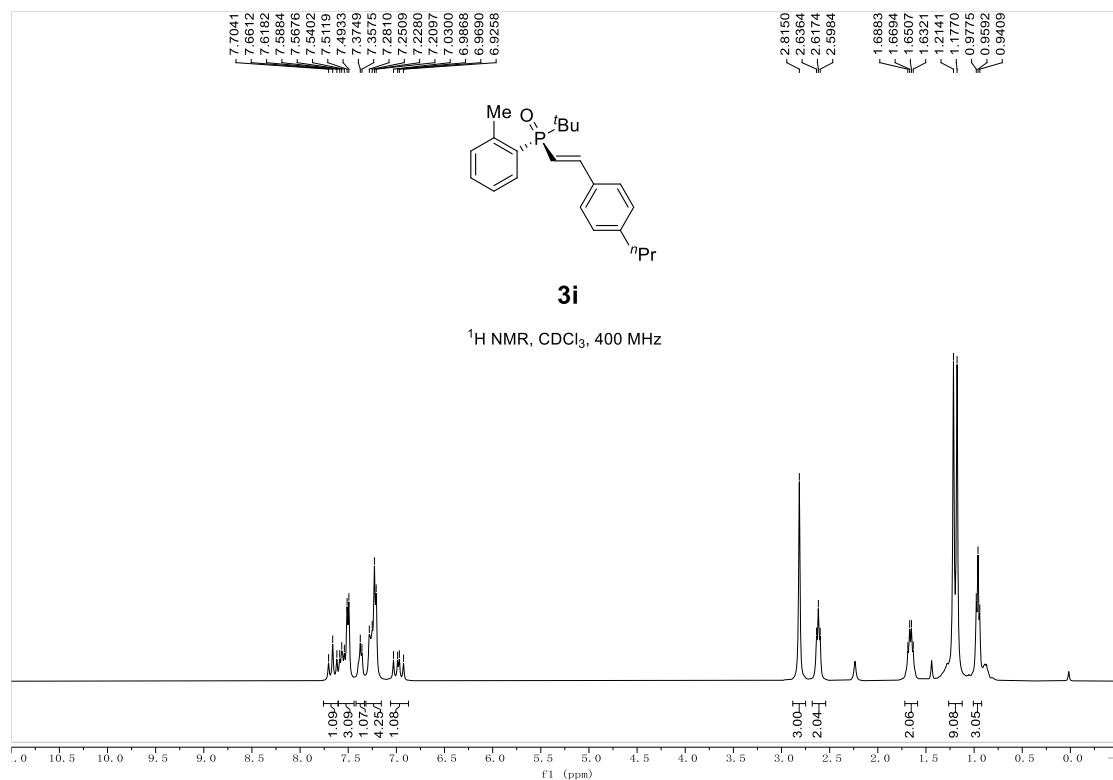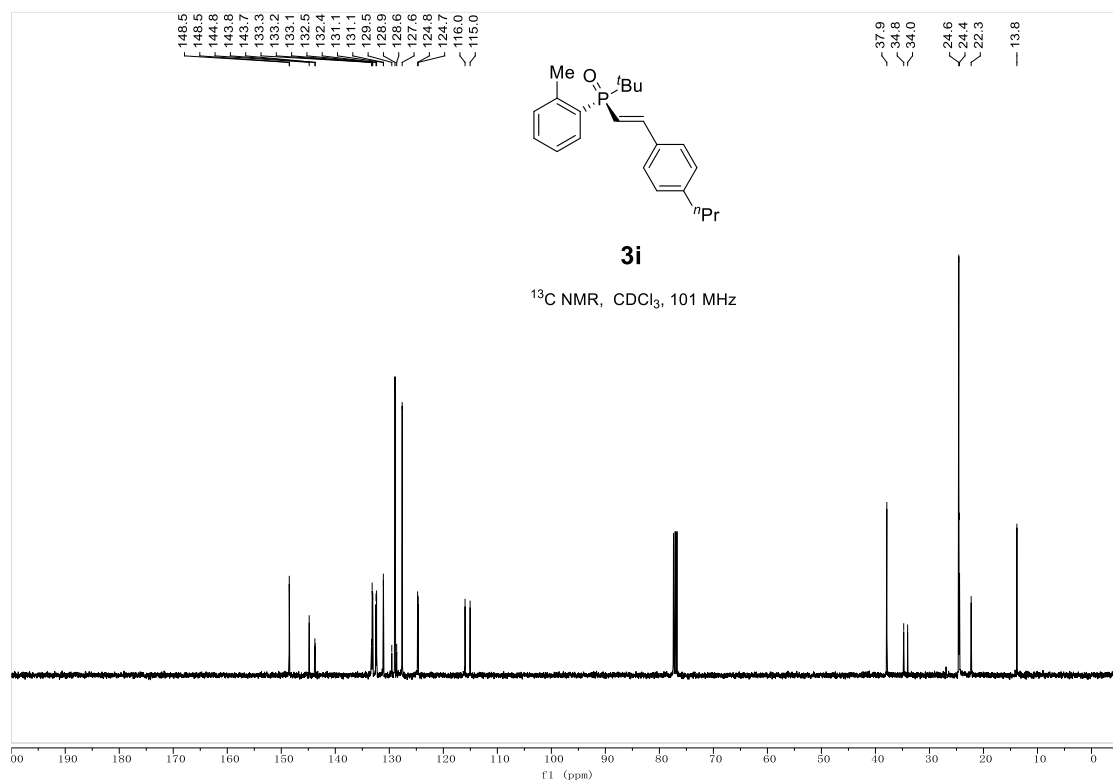



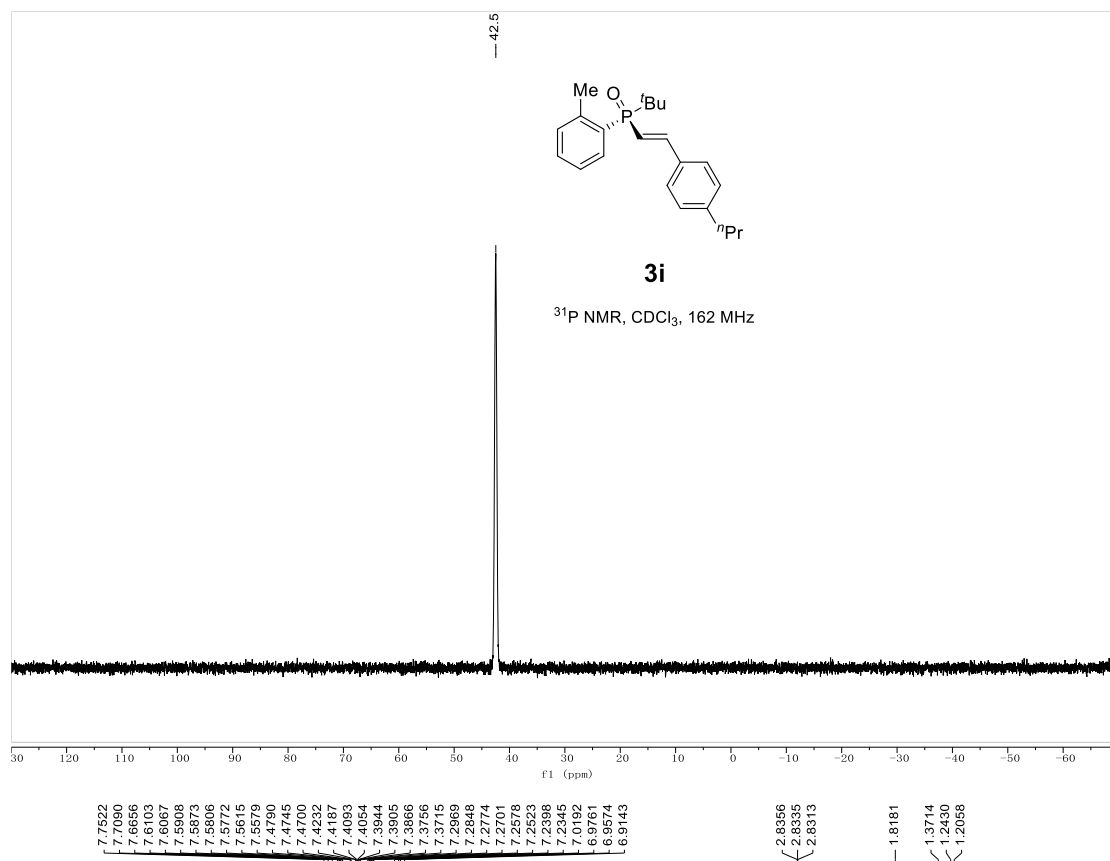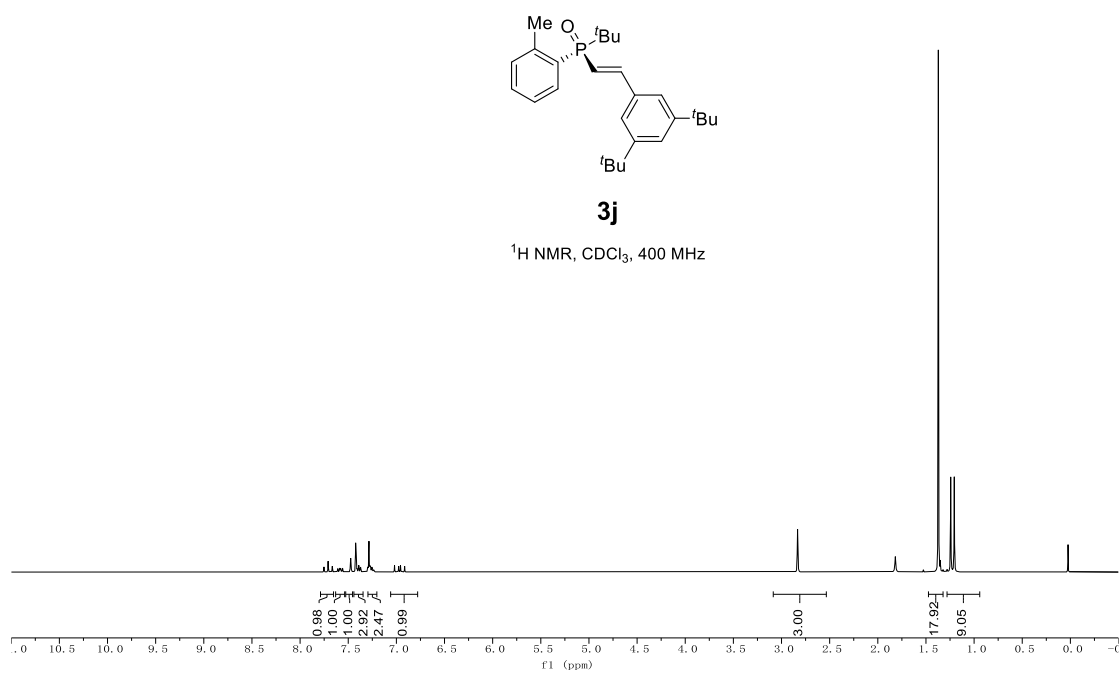

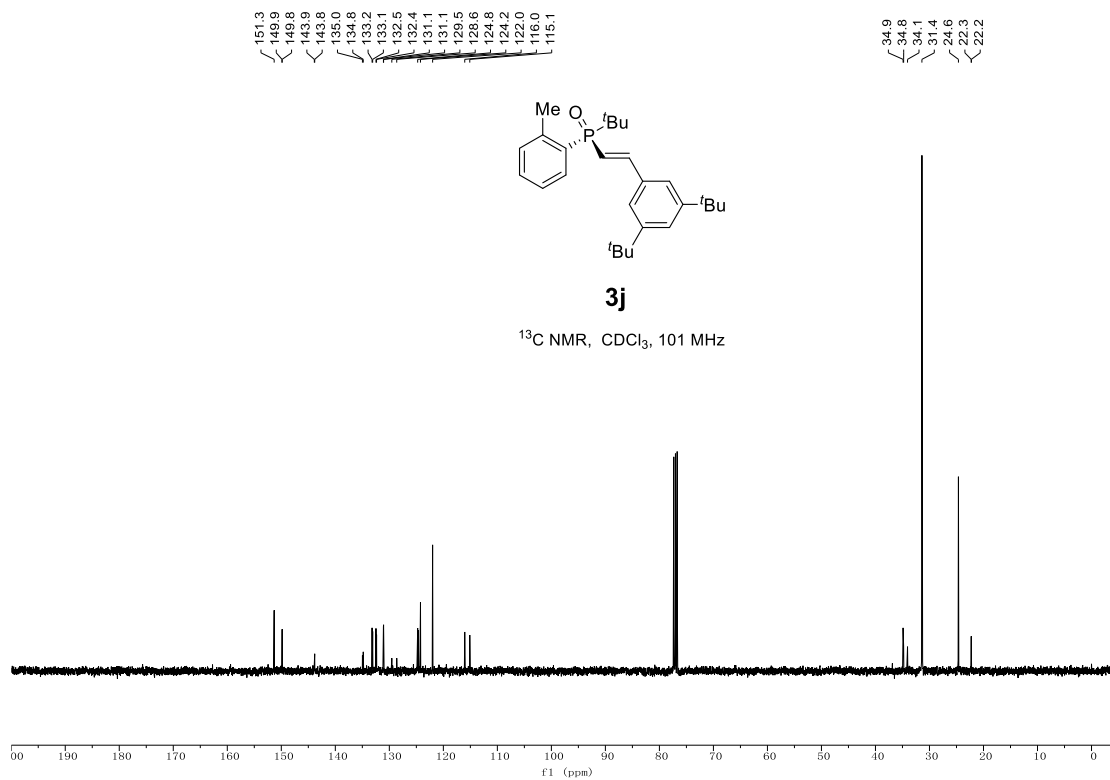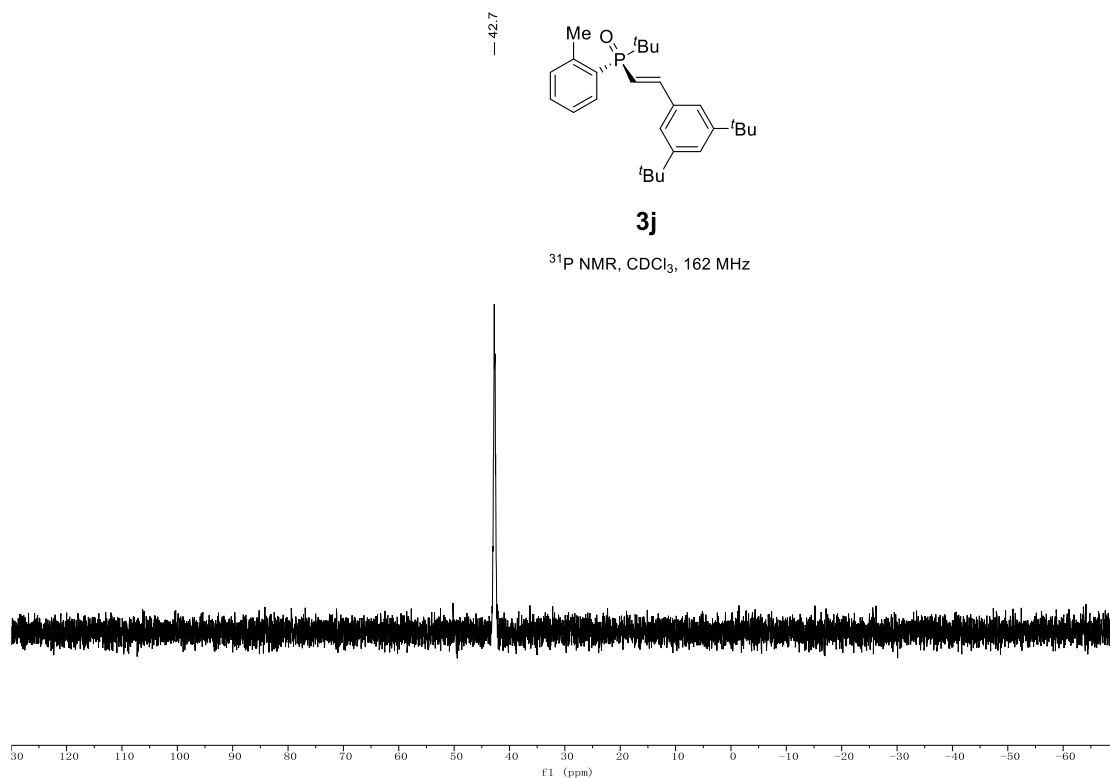

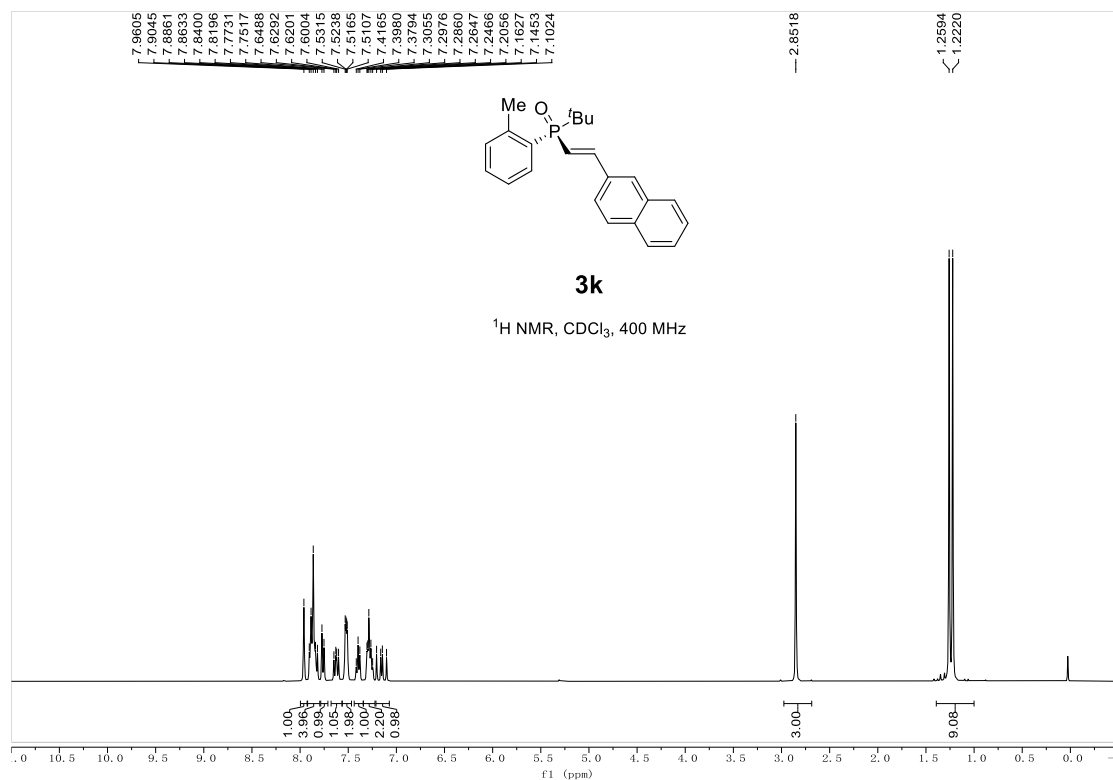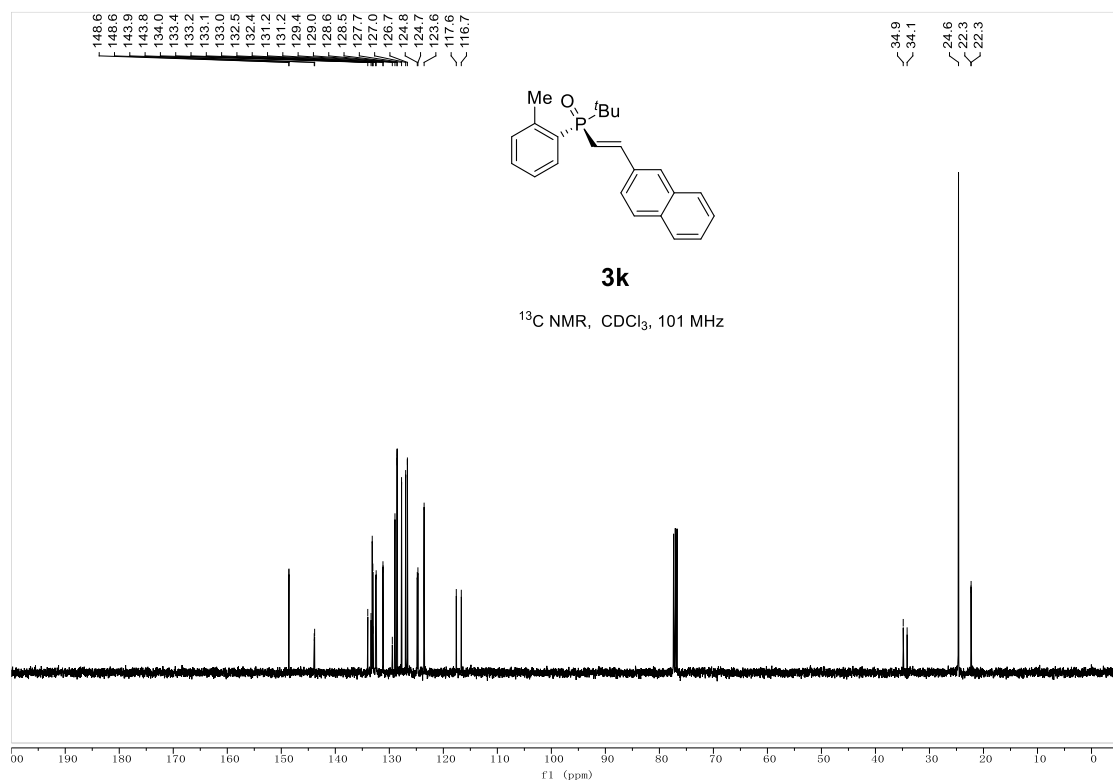

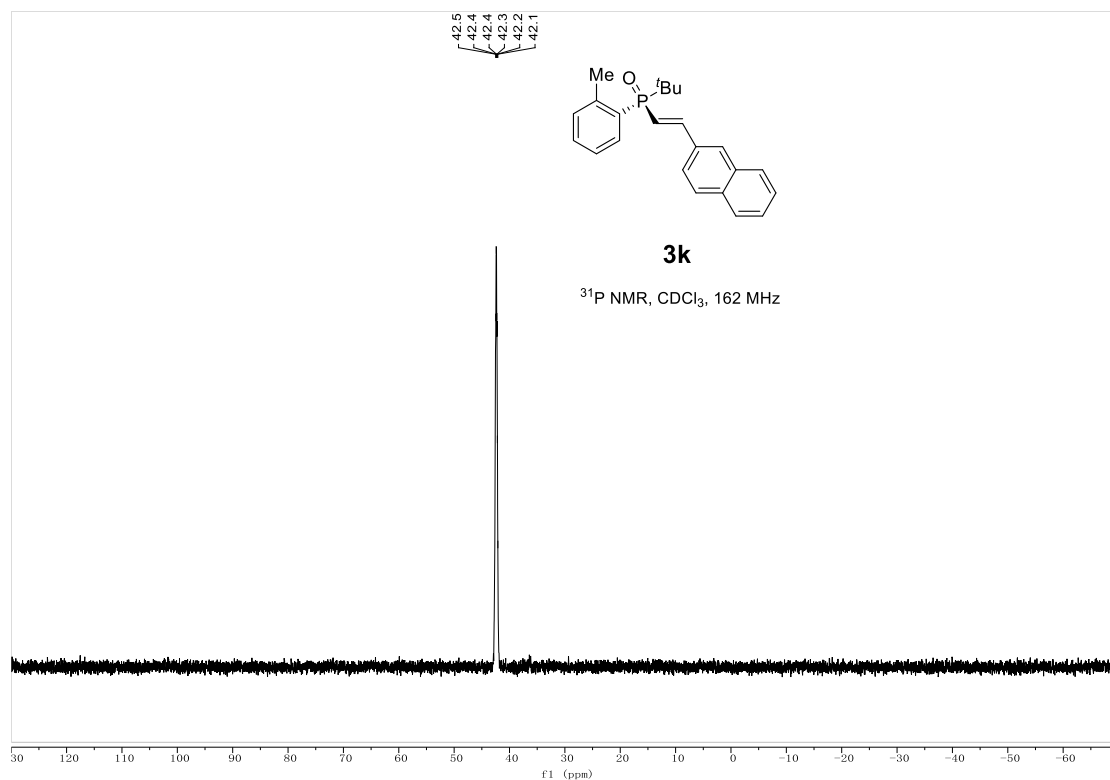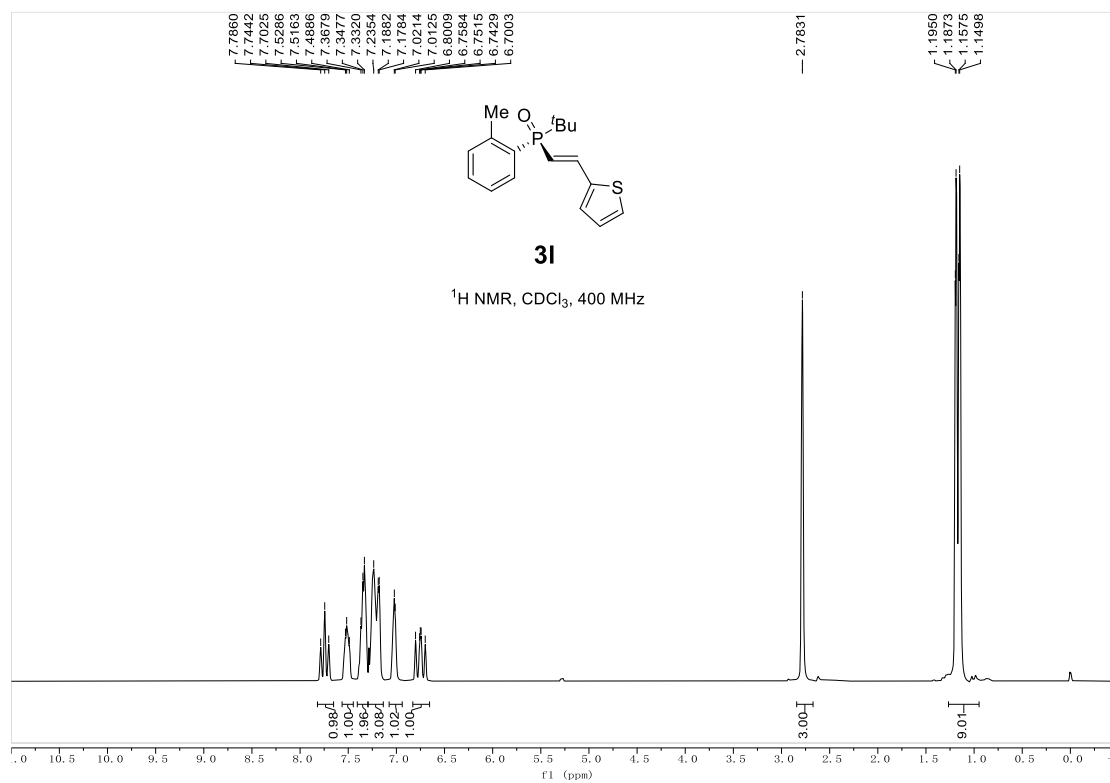

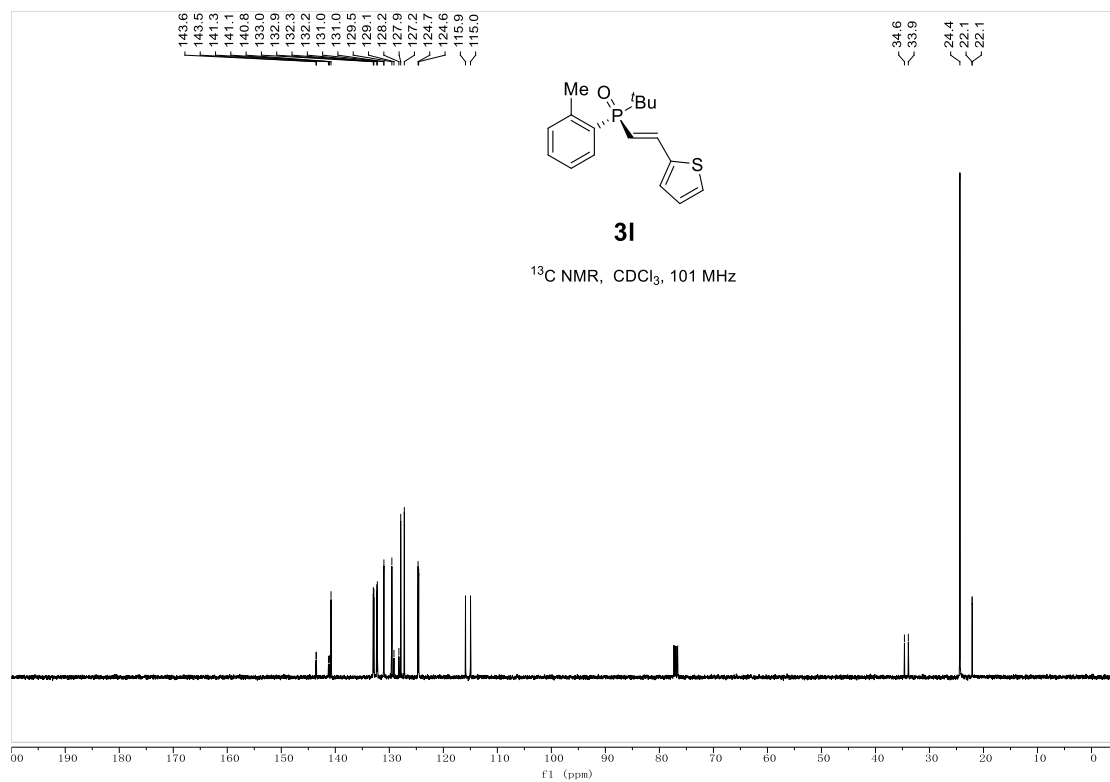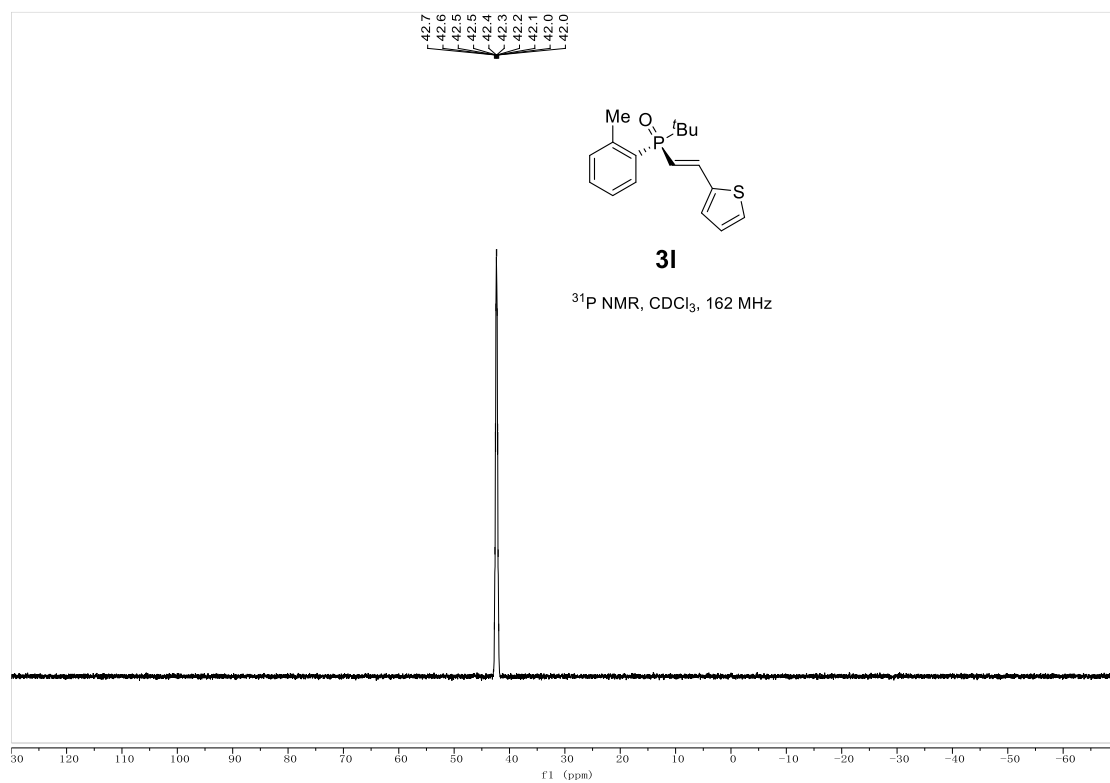

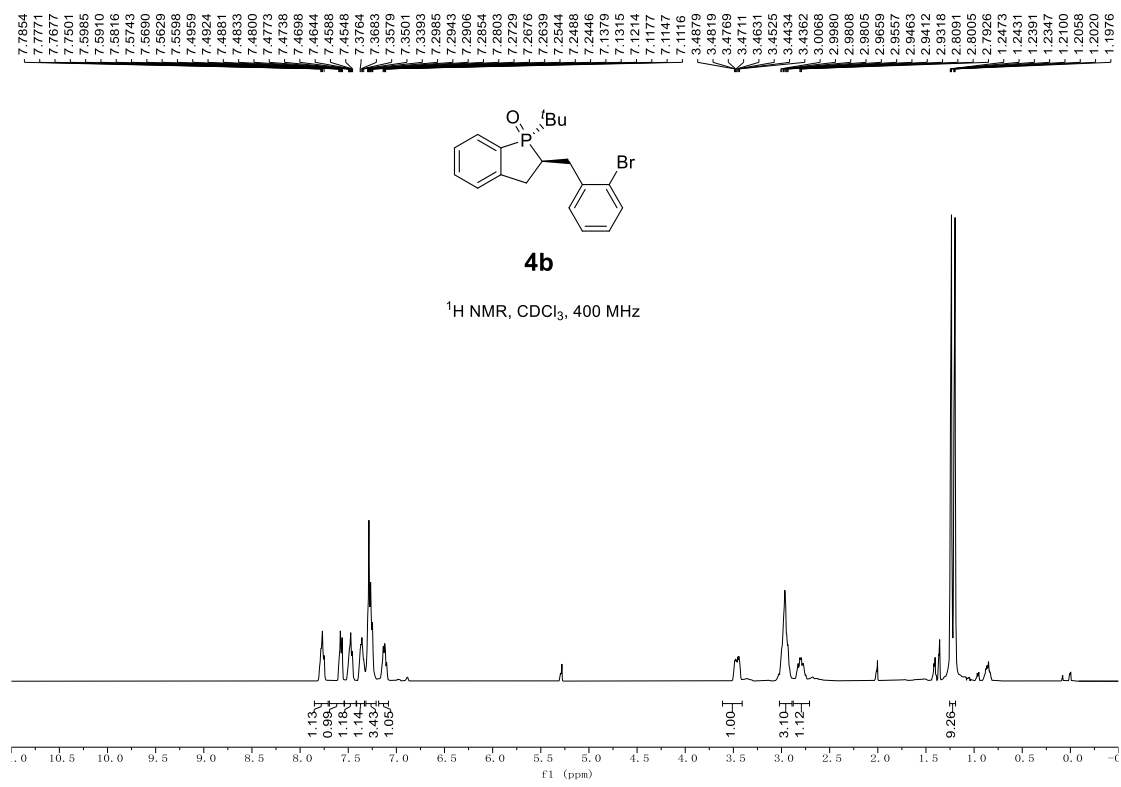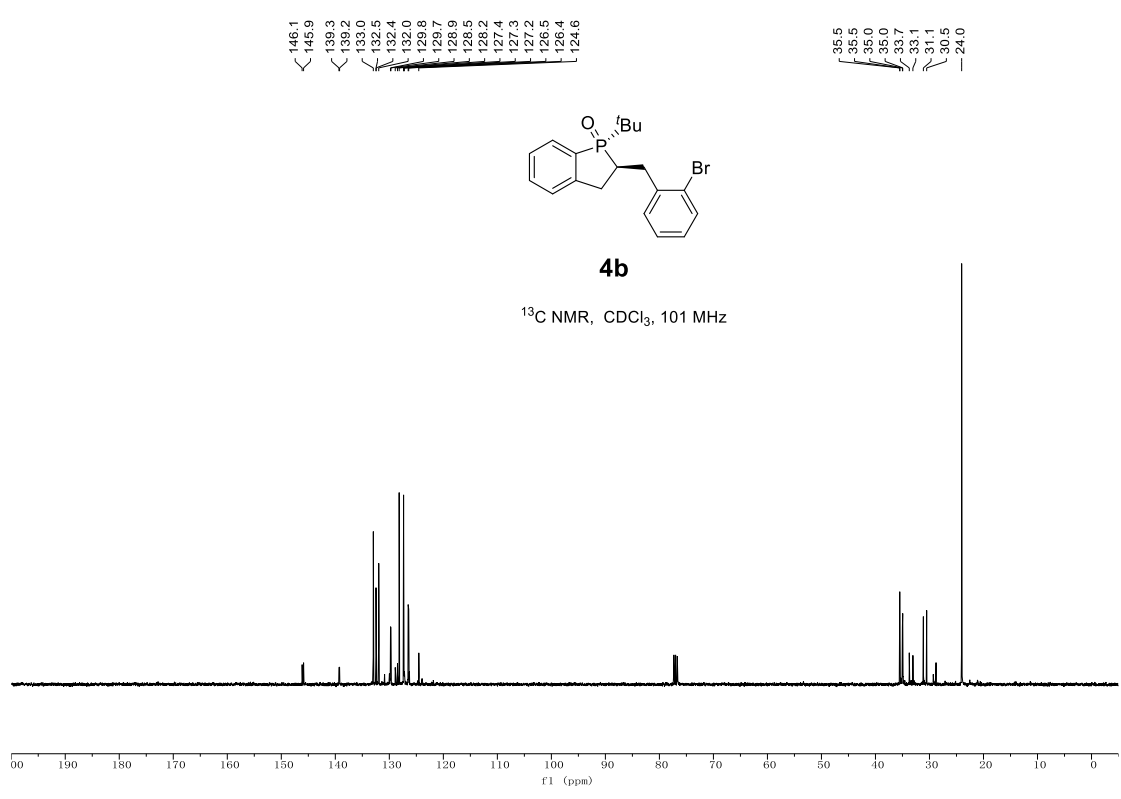

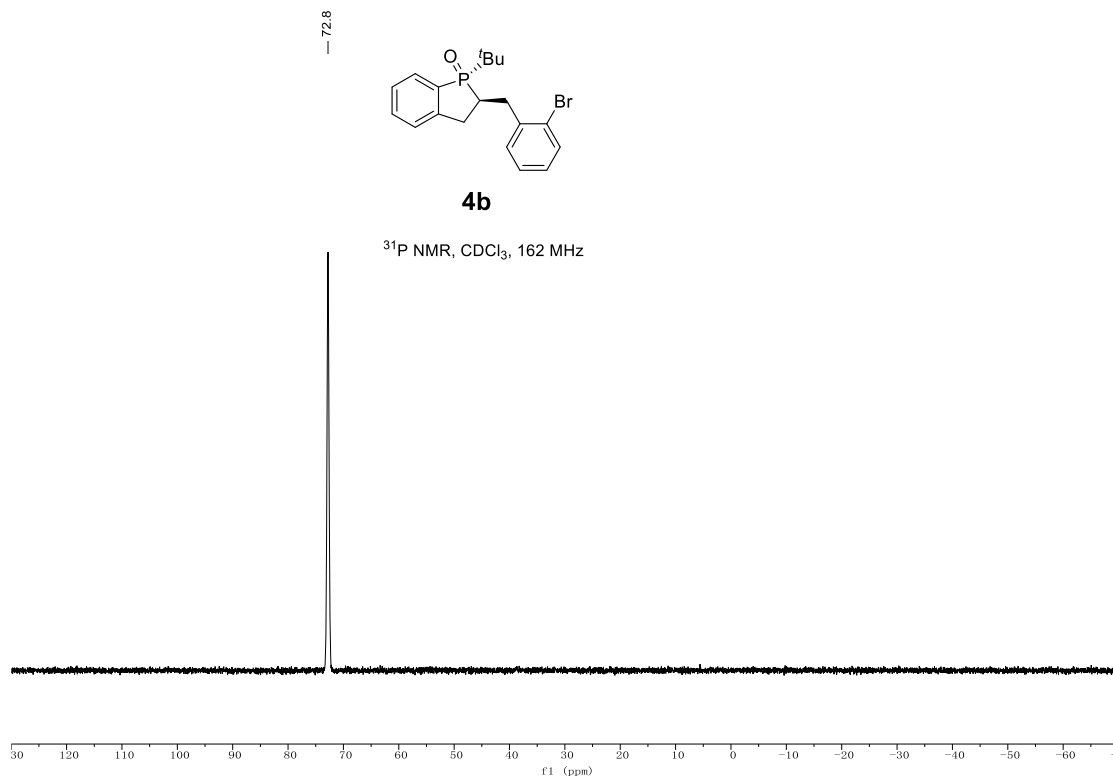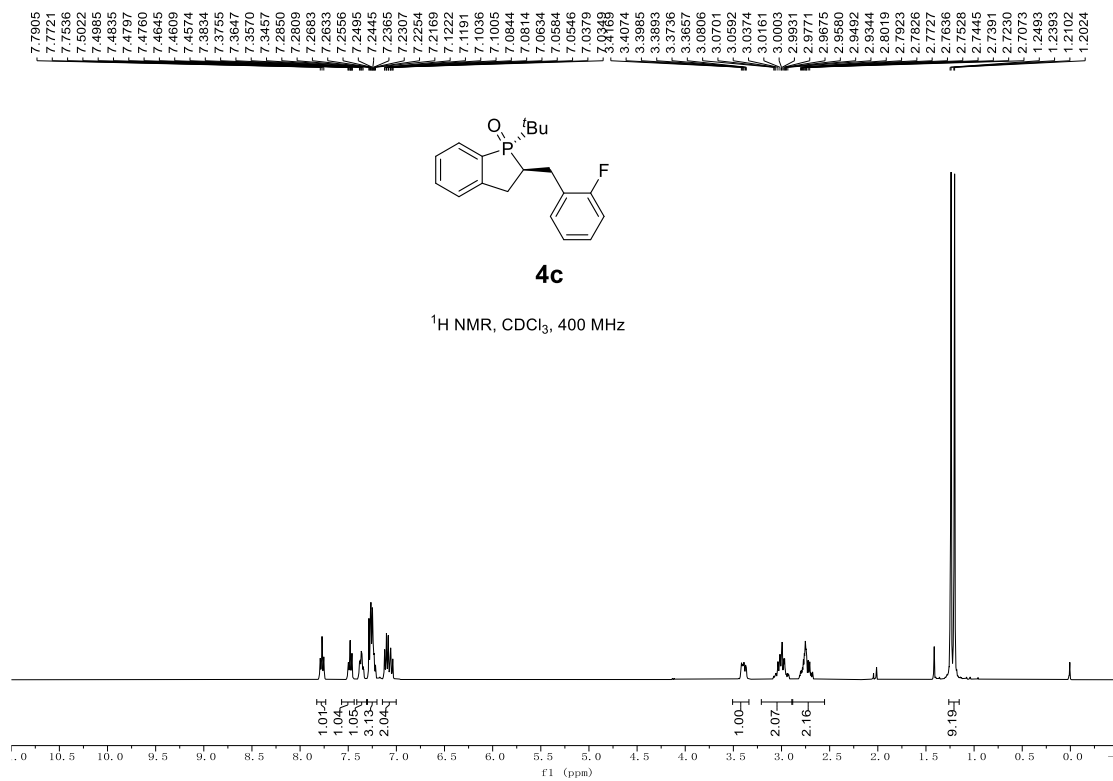

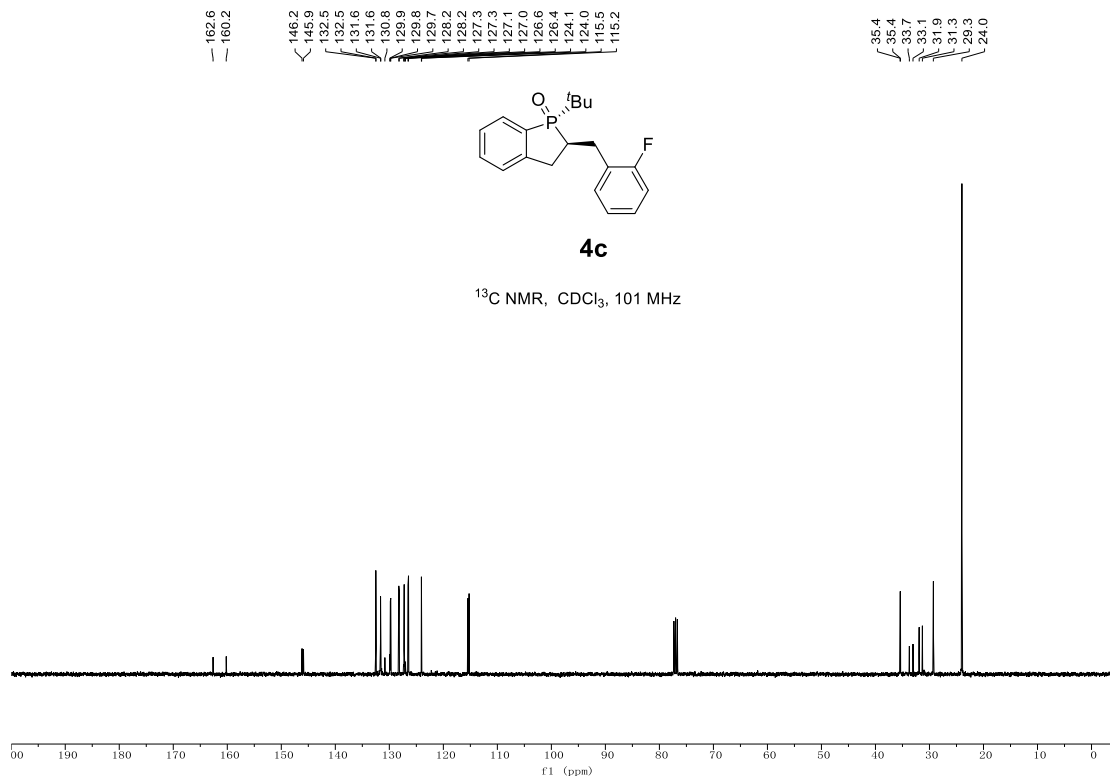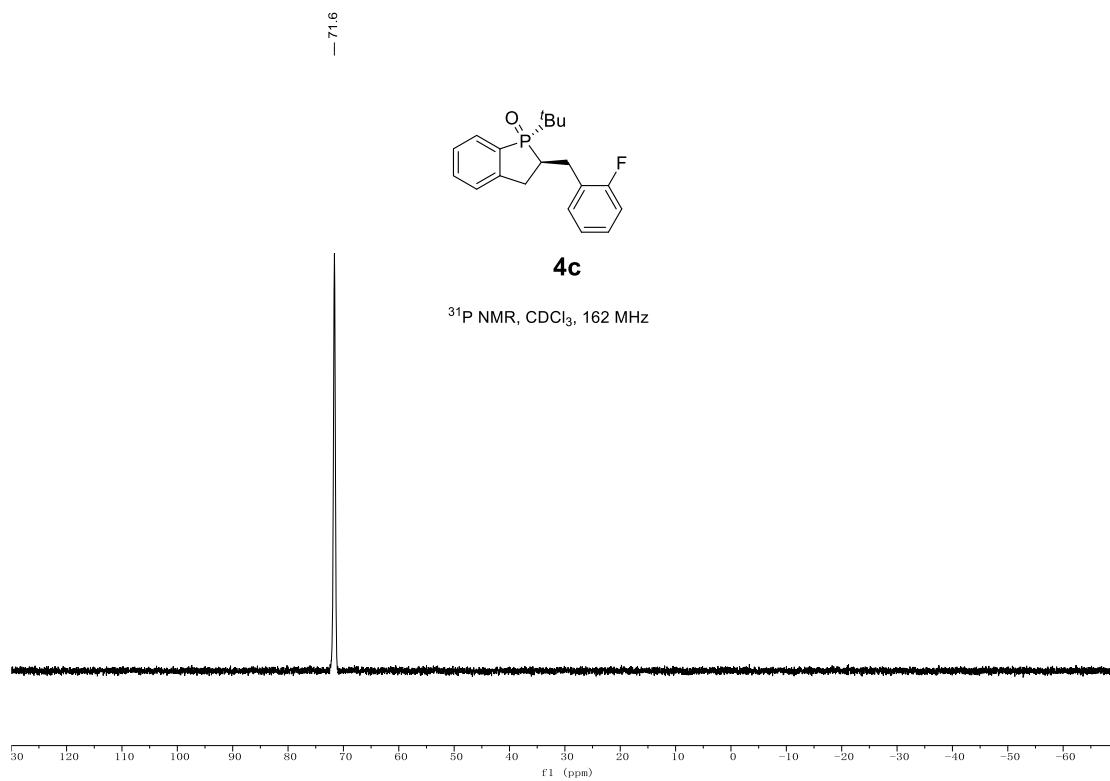



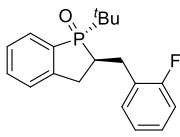

**4c**

$^{19}\text{F}$  NMR,  $\text{CDCl}_3$ , 377 MHz

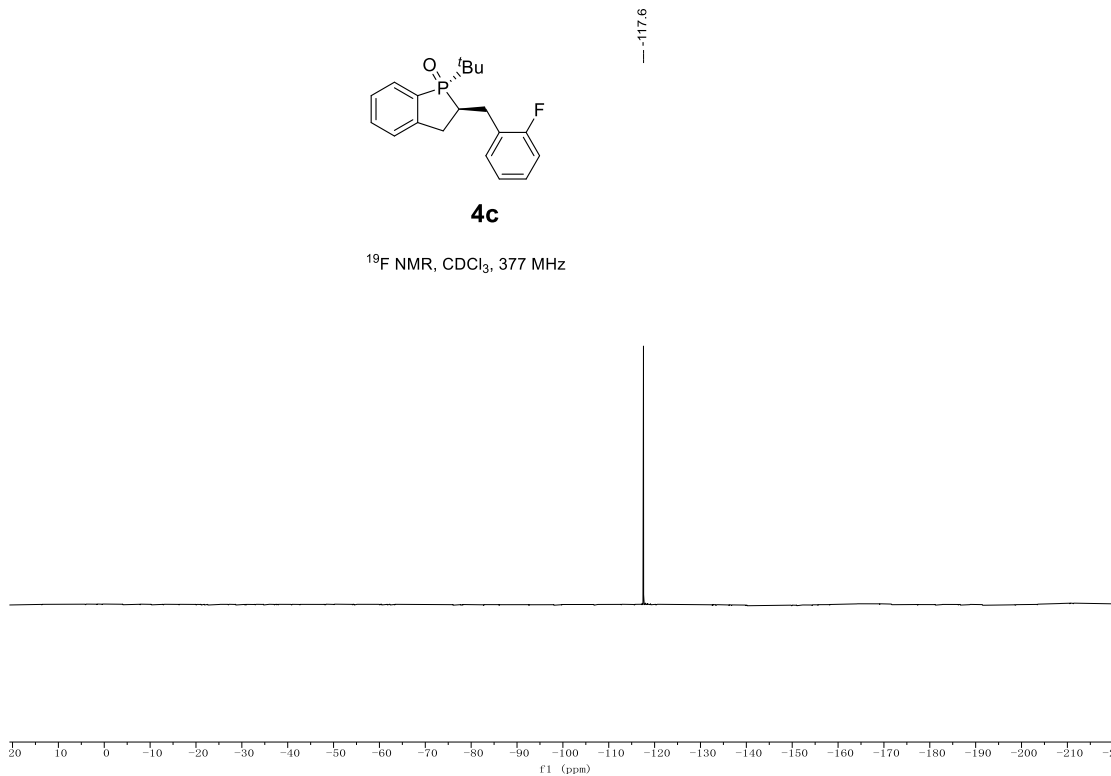

7.7909  
7.7722  
7.7637  
7.5131  
7.4942  
7.4754  
7.3978  
7.3901  
7.3791  
7.3714  
7.3602  
7.3526  
7.2856  
7.2764  
7.2671  
7.2559  
7.2493  
7.2398  
7.1825  
7.1445  
3.3718  
3.3618  
3.3543  
3.3445  
3.3278  
3.3205  
3.0972  
3.0862  
3.0773  
3.0653  
3.0345  
3.0141  
2.9444  
2.9365  
2.9278  
2.9213  
2.9015  
2.8933  
2.77147  
2.7050  
2.6948  
2.6853  
2.6759  
2.6662  
2.6613  
2.6446  
2.6361  
2.6213  
2.6072  
2.5912  
1.2389  
1.2019

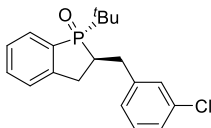

**4d**

$^1\text{H}$  NMR,  $\text{CDCl}_3$ , 400 MHz

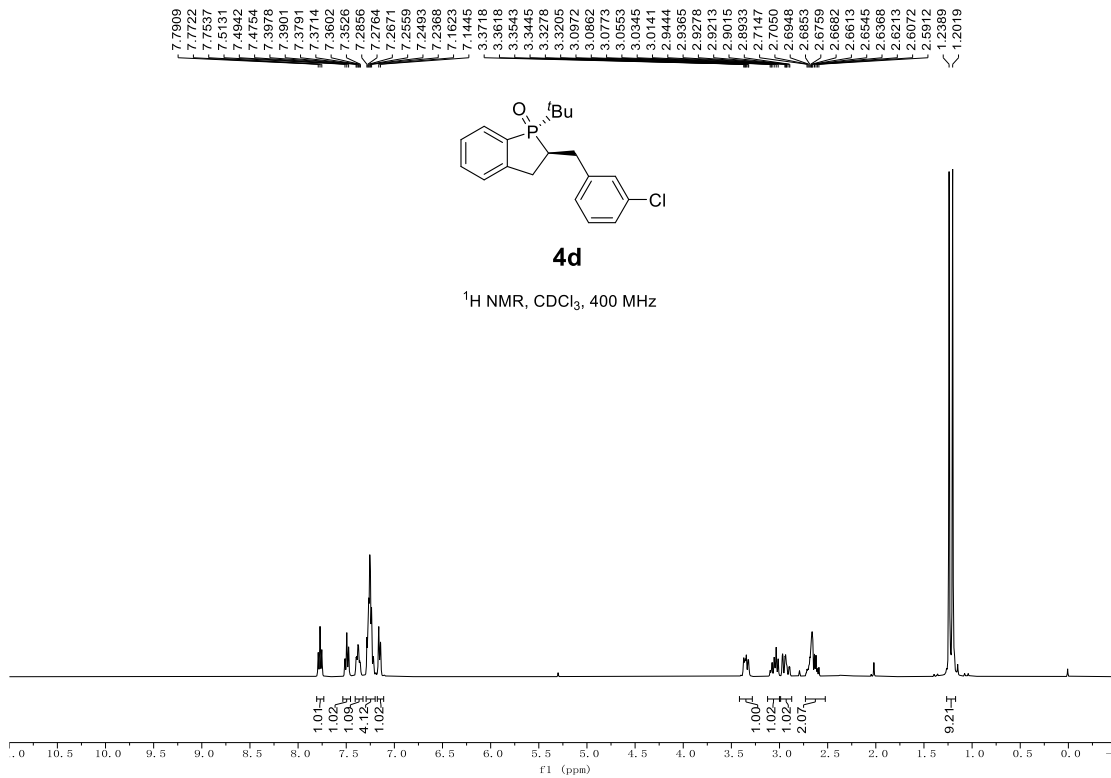

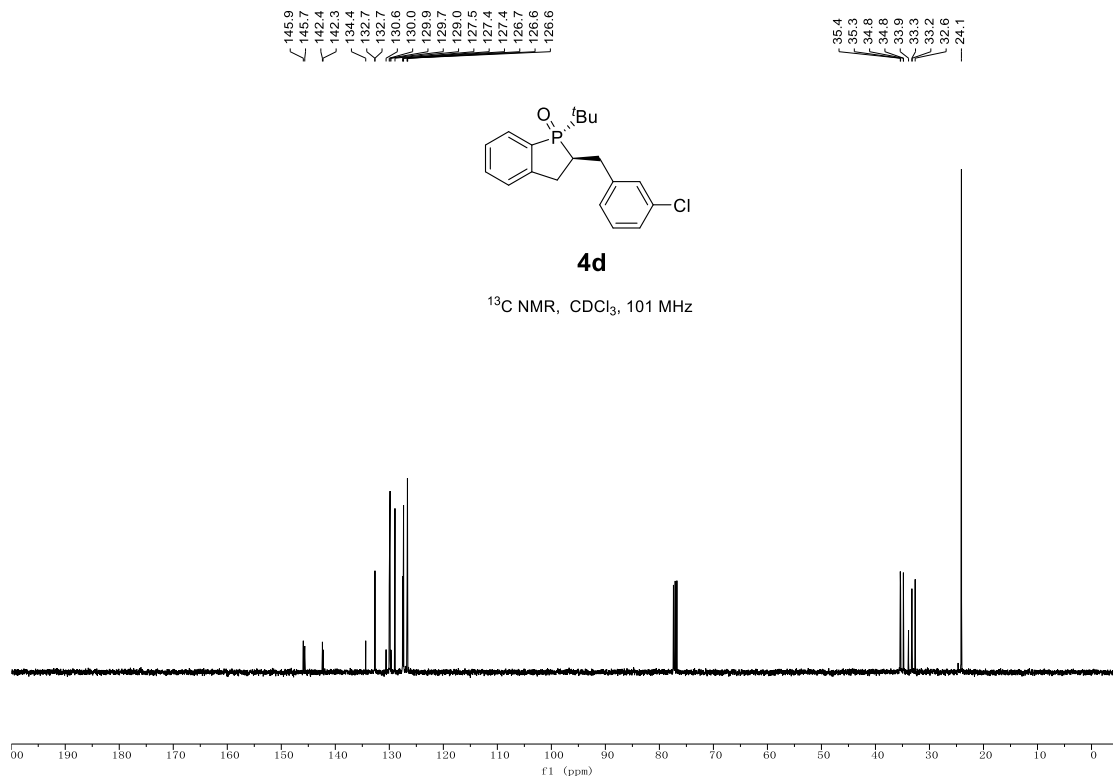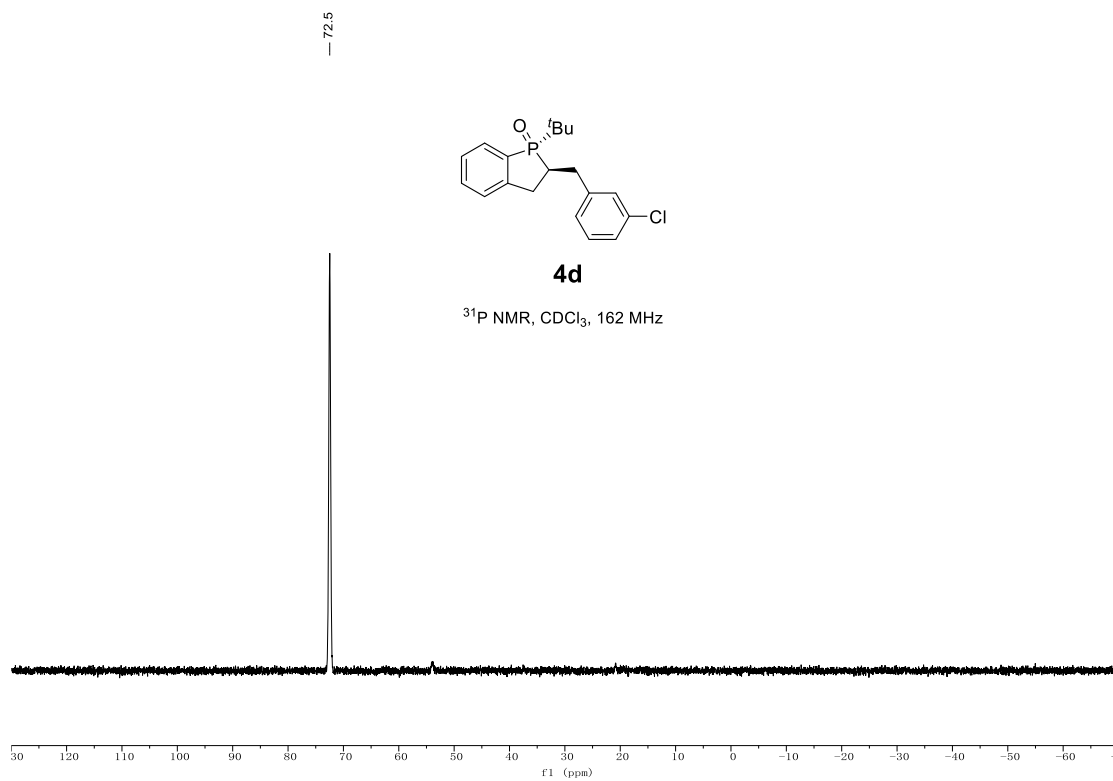

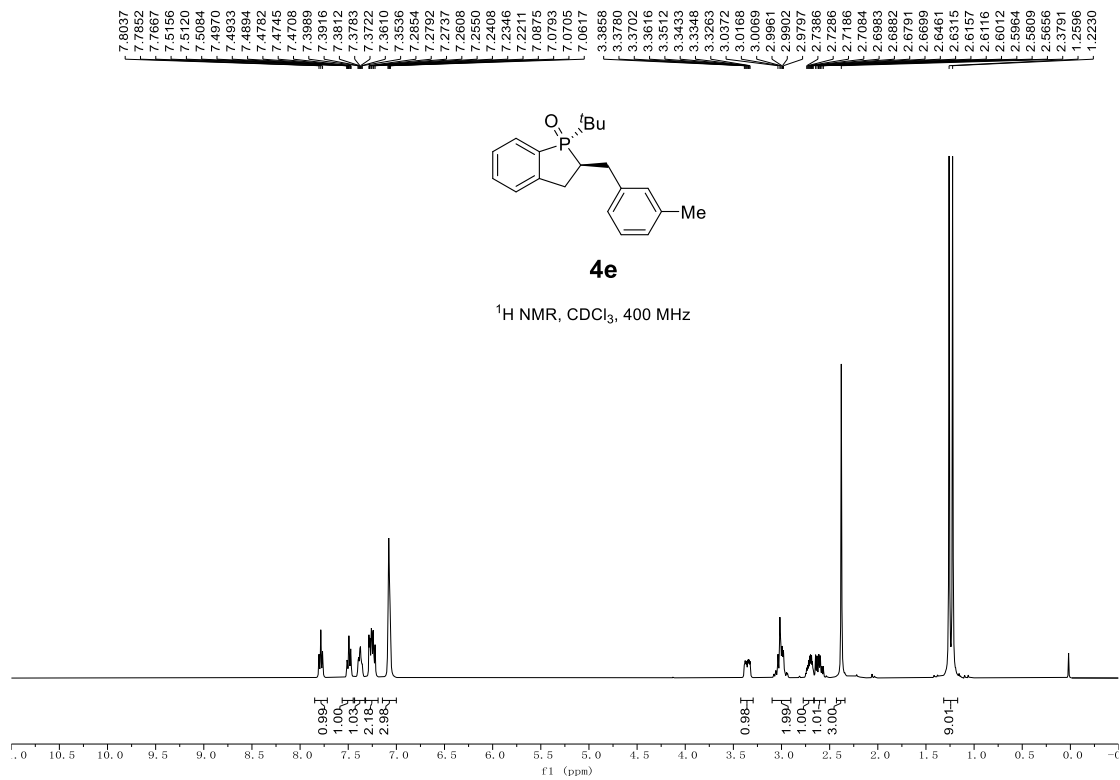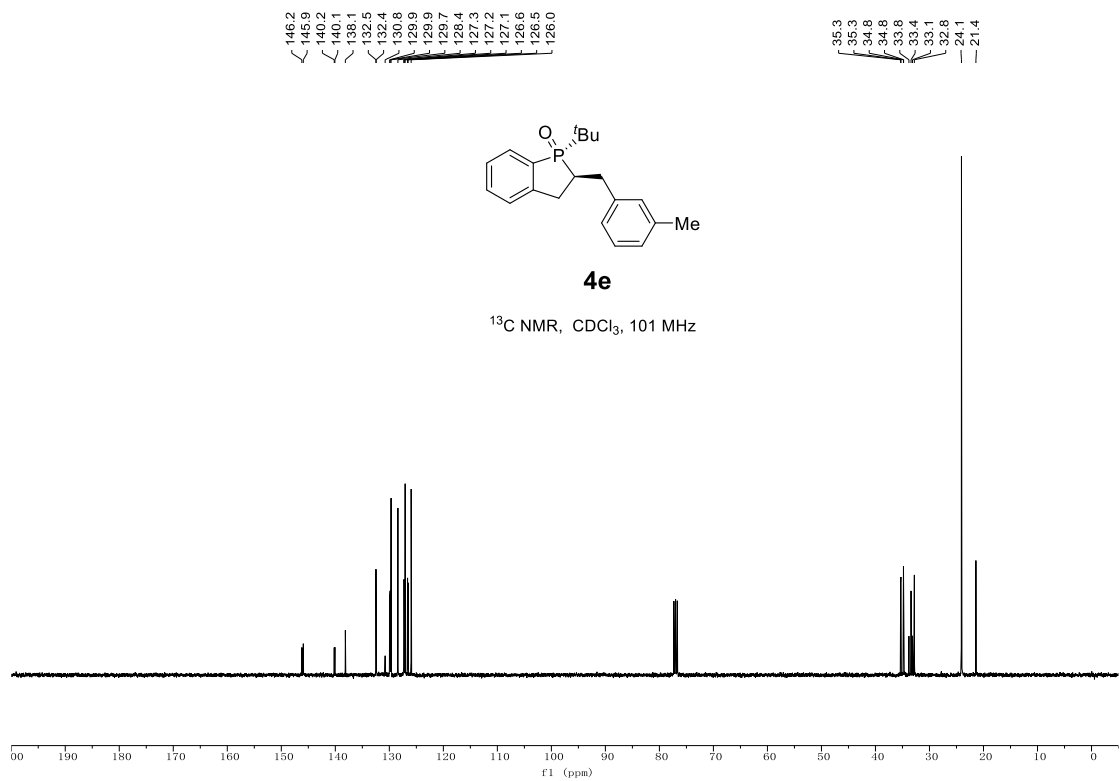

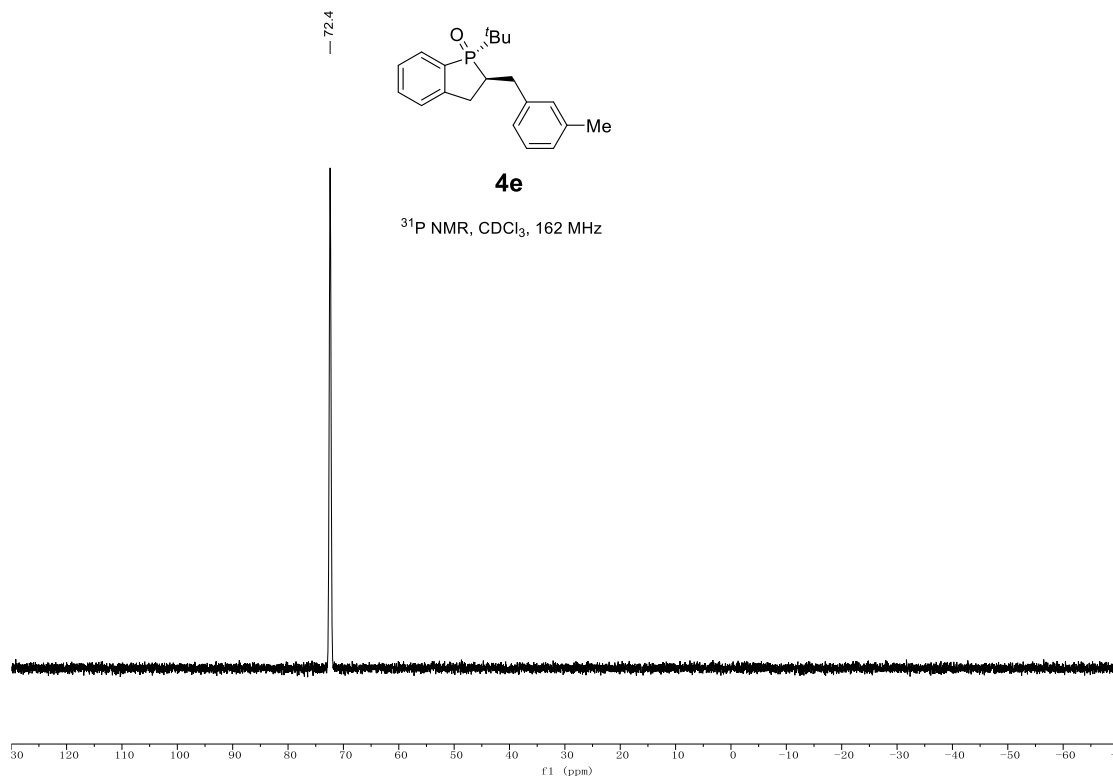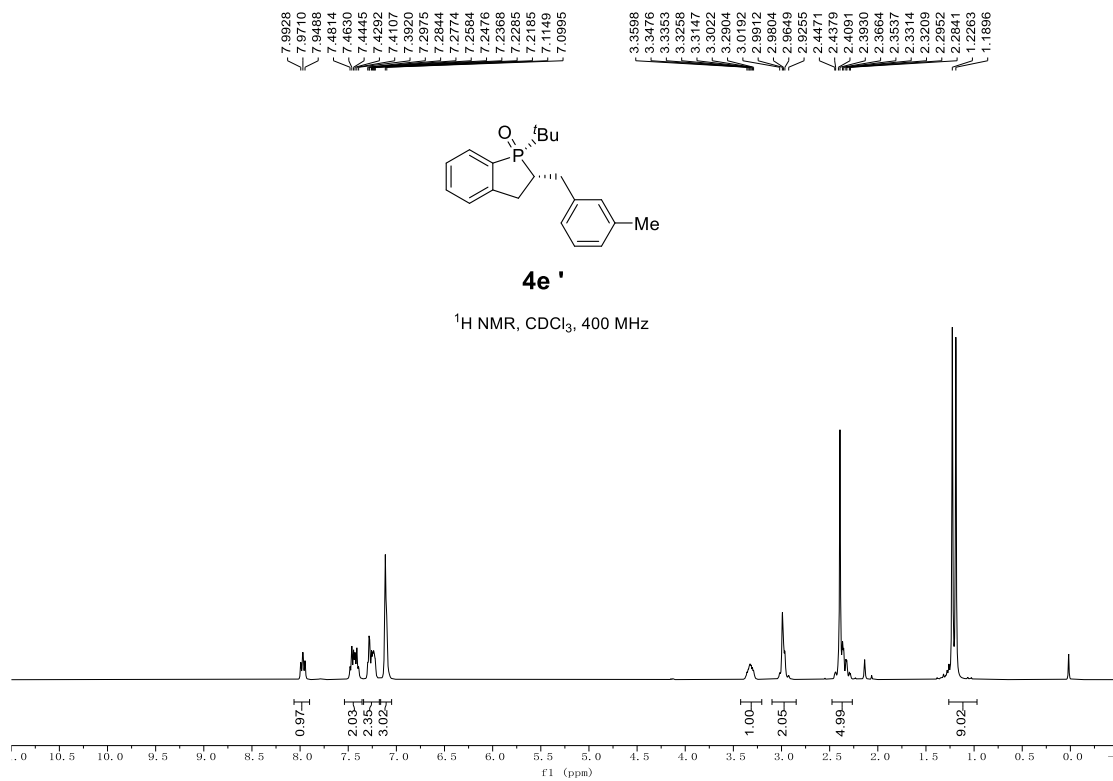

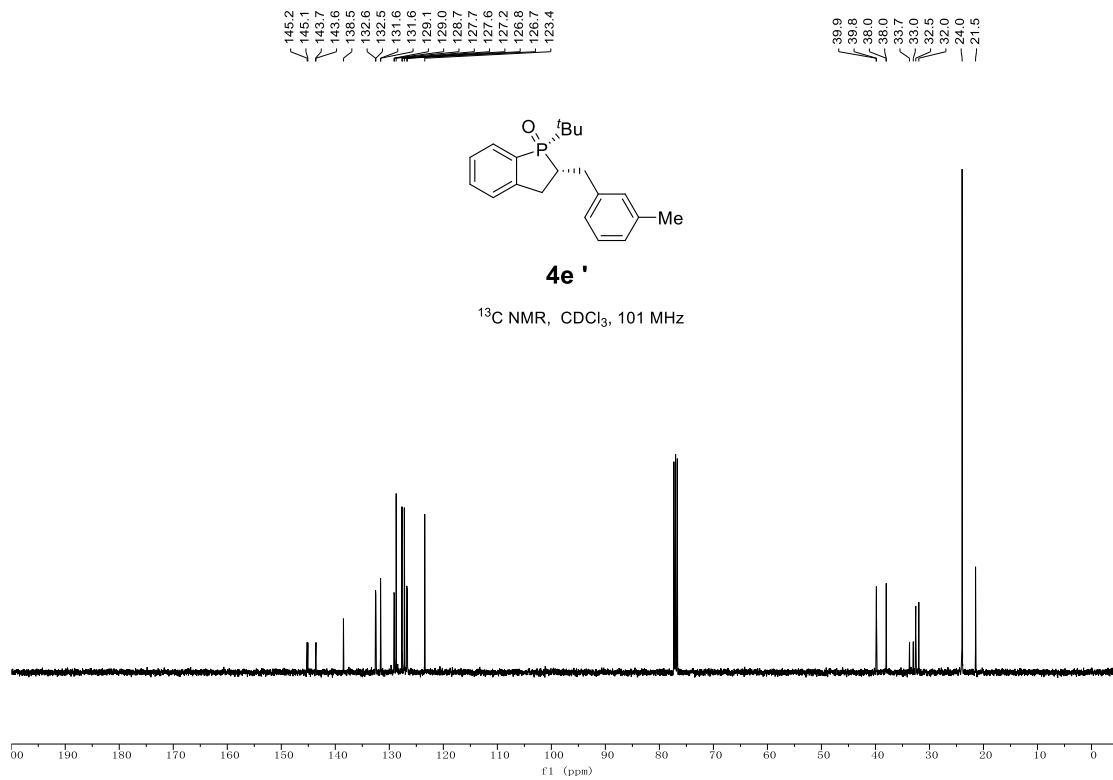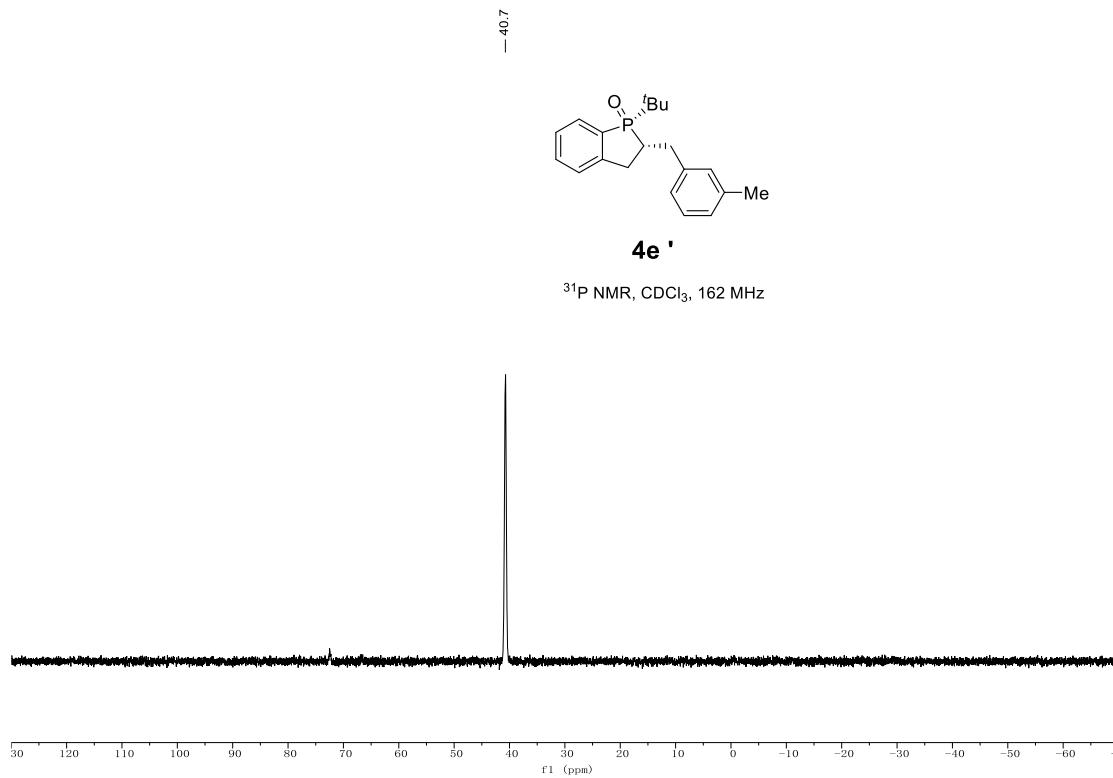

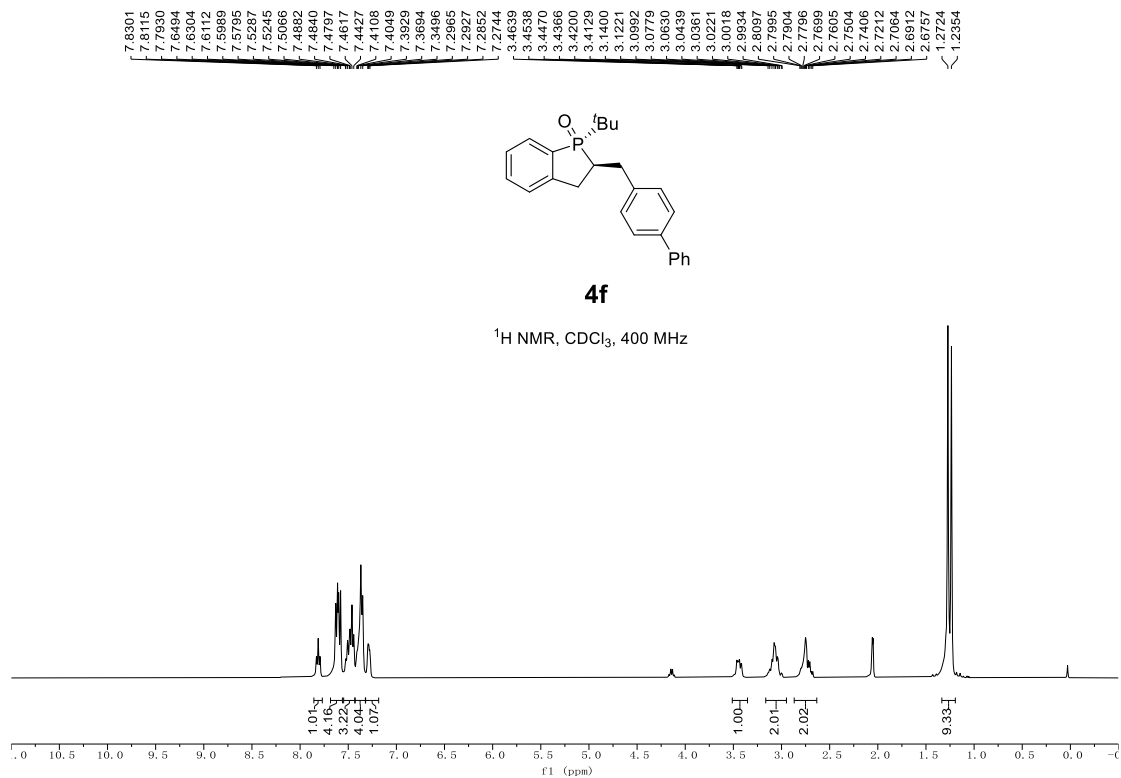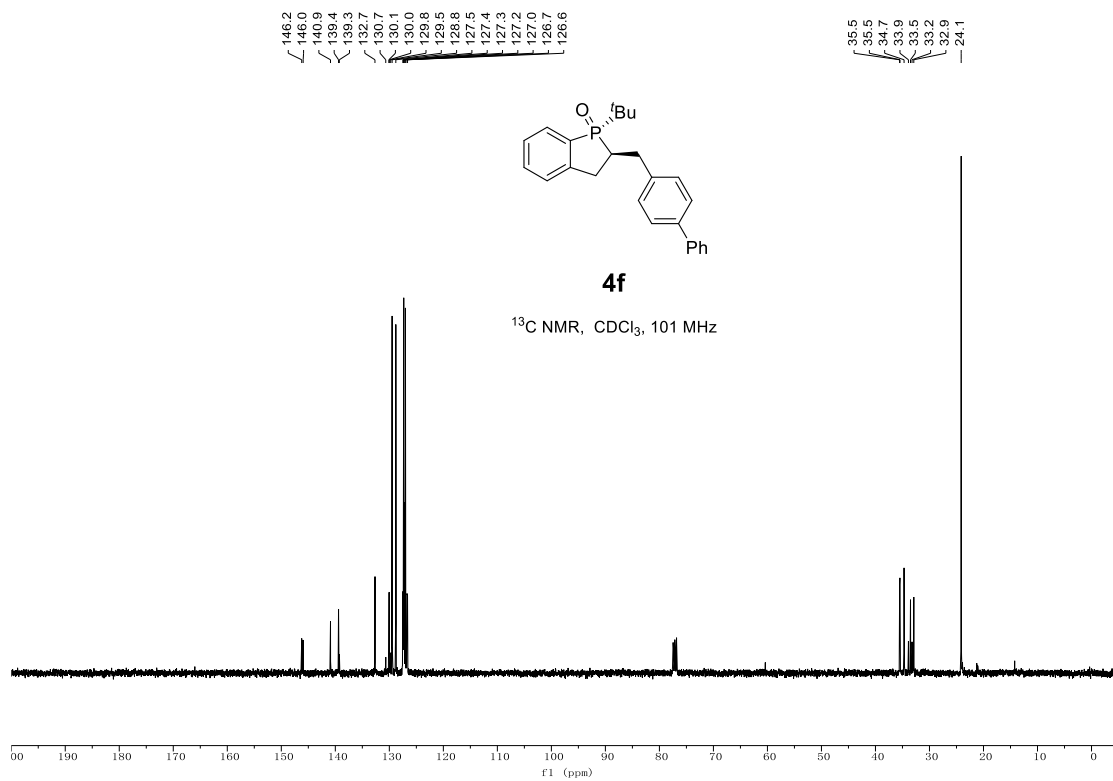

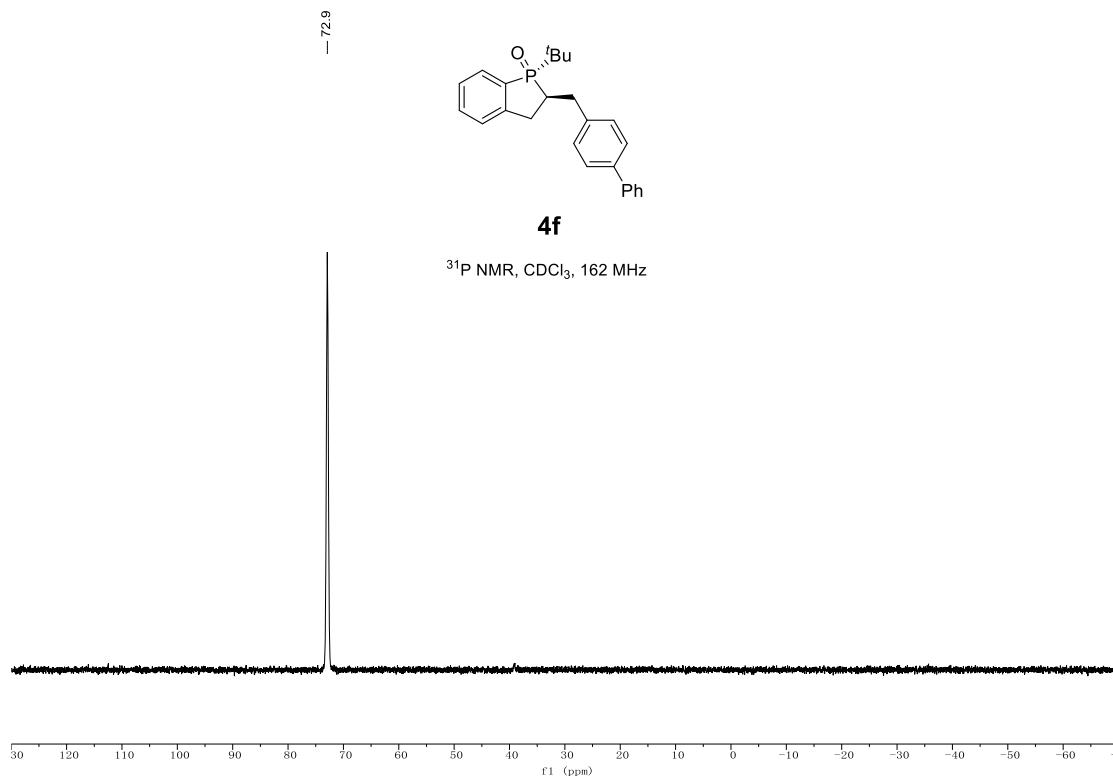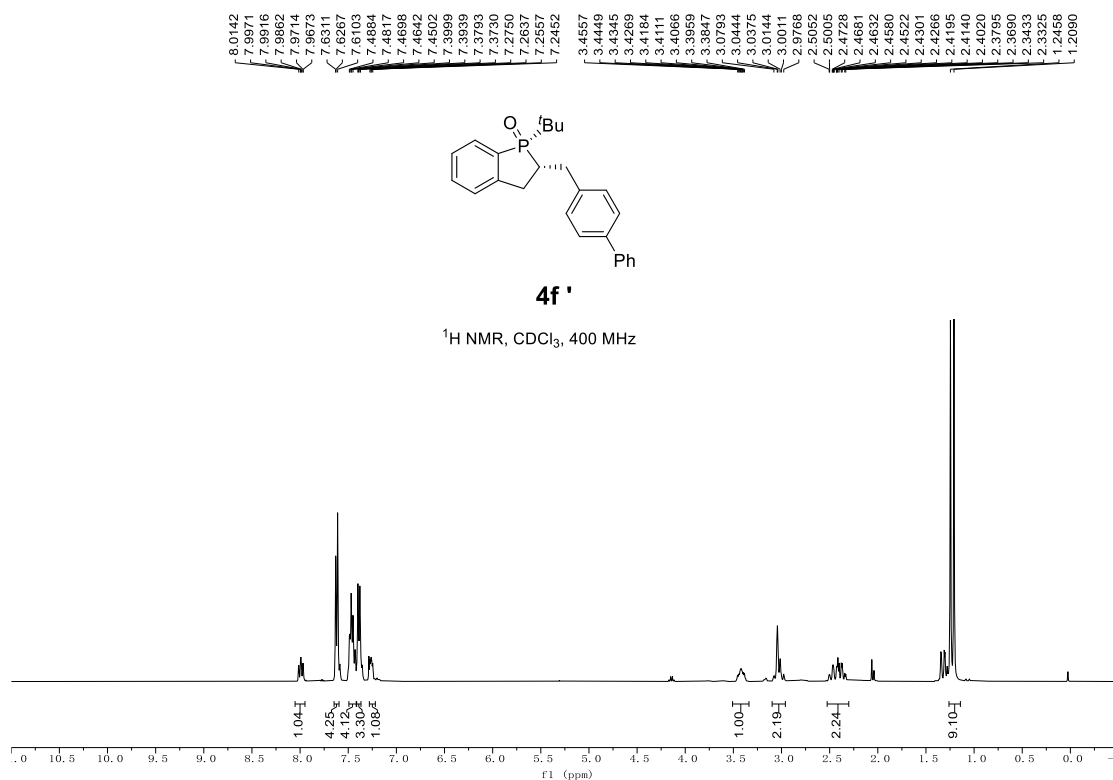

144.2  
144.1  
143.5  
143.5  
140.6  
139.9  
132.6  
132.5  
131.7  
131.7  
129.2  
128.7  
128.7  
127.5  
127.3  
127.0  
126.9  
126.9  
126.8  
126.7  
126.7

39.9  
39.9  
37.8  
37.8  
33.0  
32.5  
31.9  
25.3  
24.4  
24.0

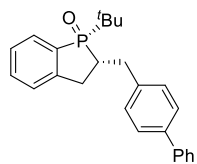

**4f'**

<sup>13</sup>C NMR, CDCl<sub>3</sub>, 101 MHz

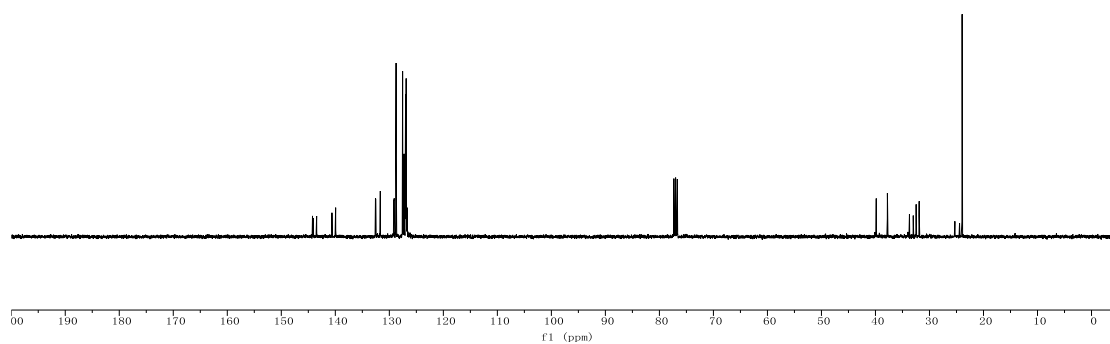

41.0  
40.9  
40.8  
40.8  
40.7

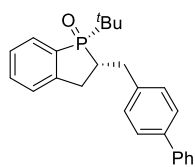

**4f'**

<sup>31</sup>P NMR, CDCl<sub>3</sub>, 162 MHz

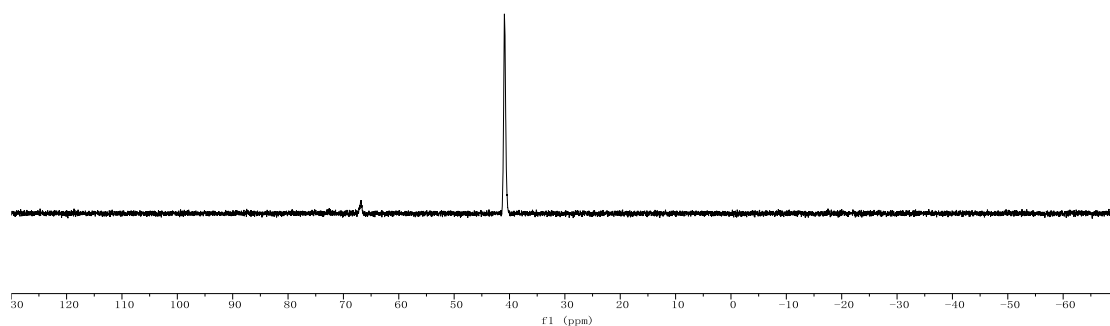



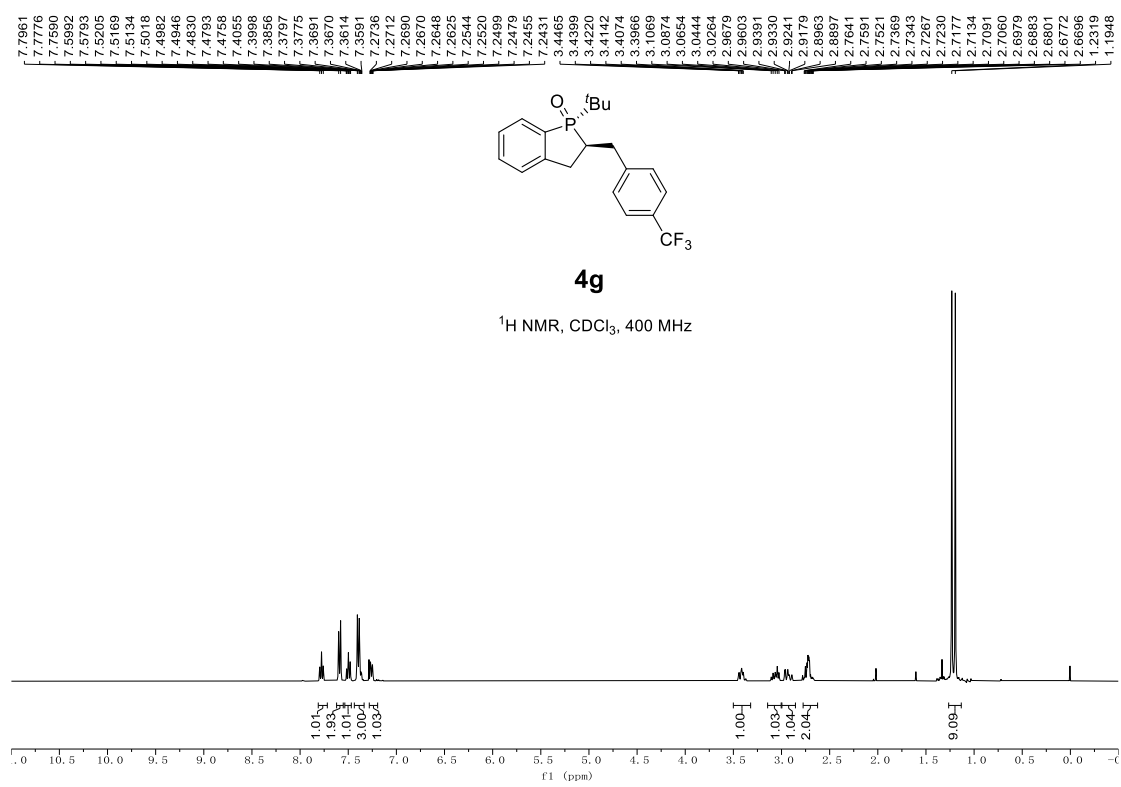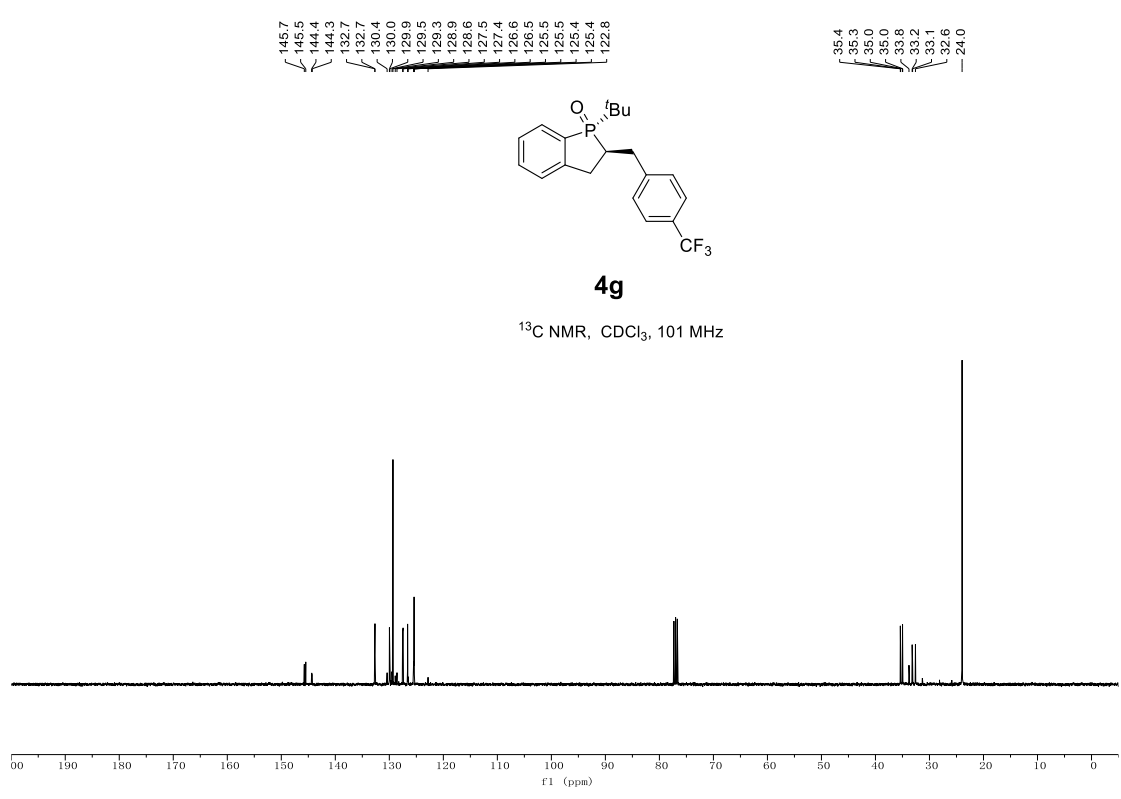

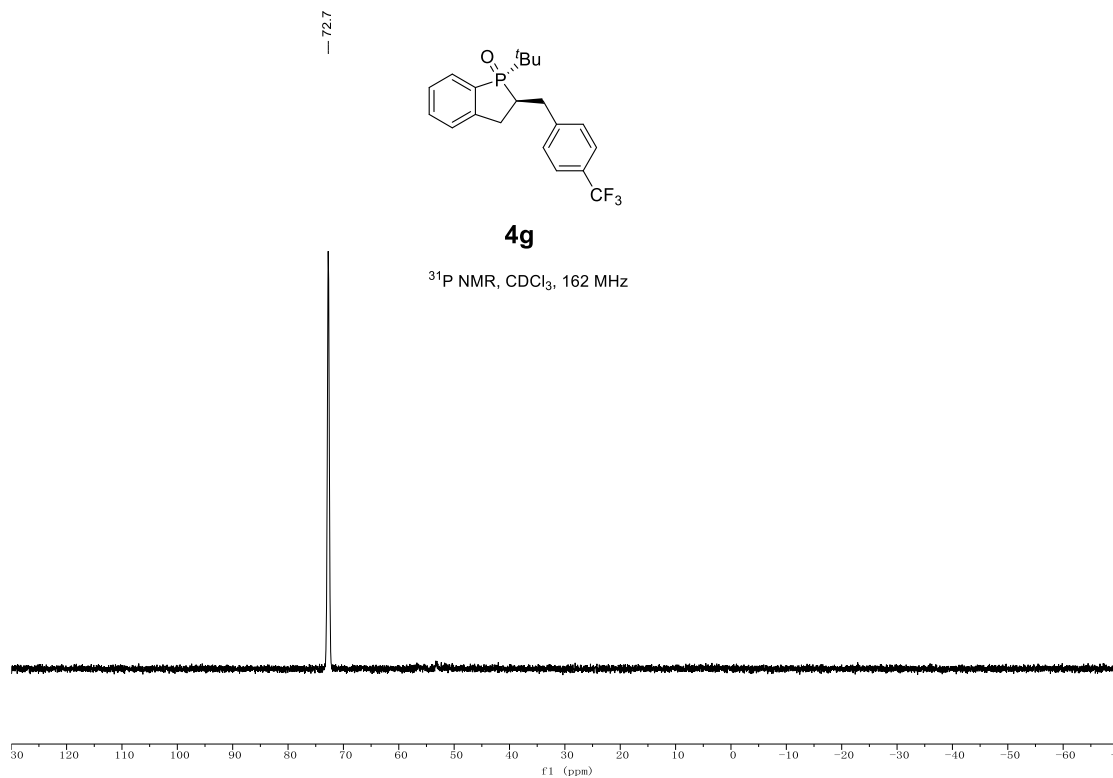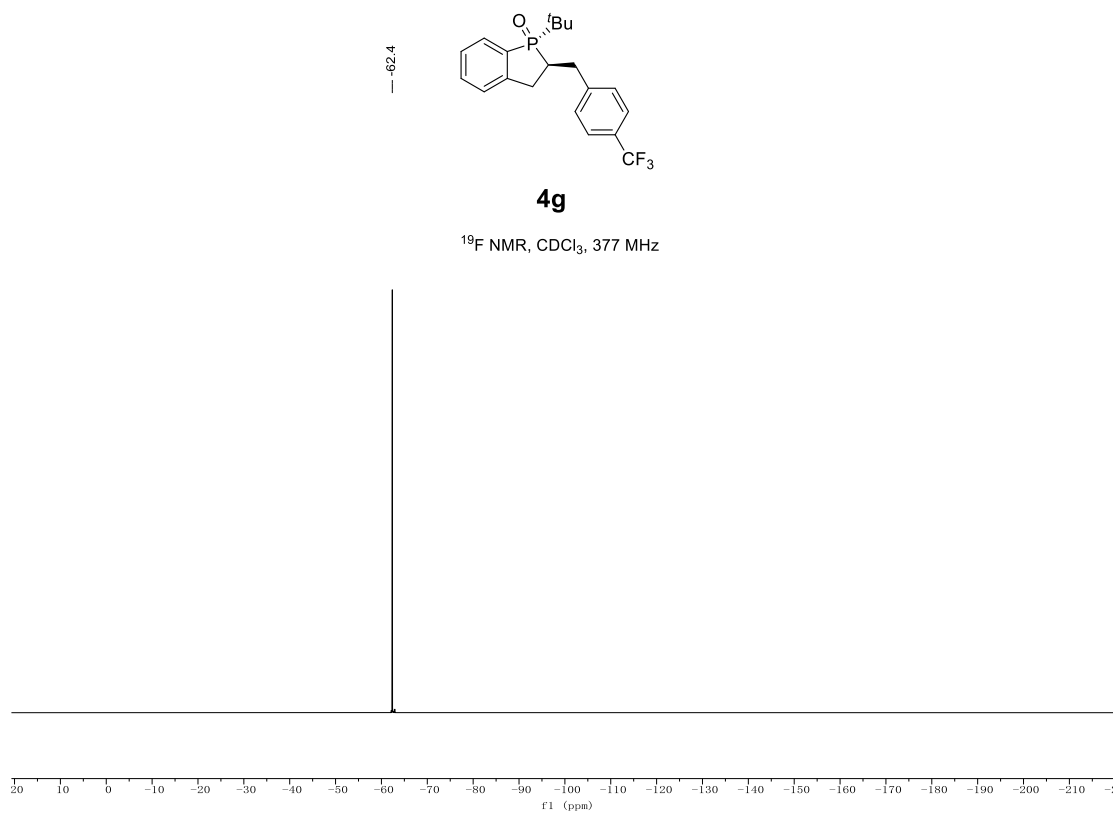

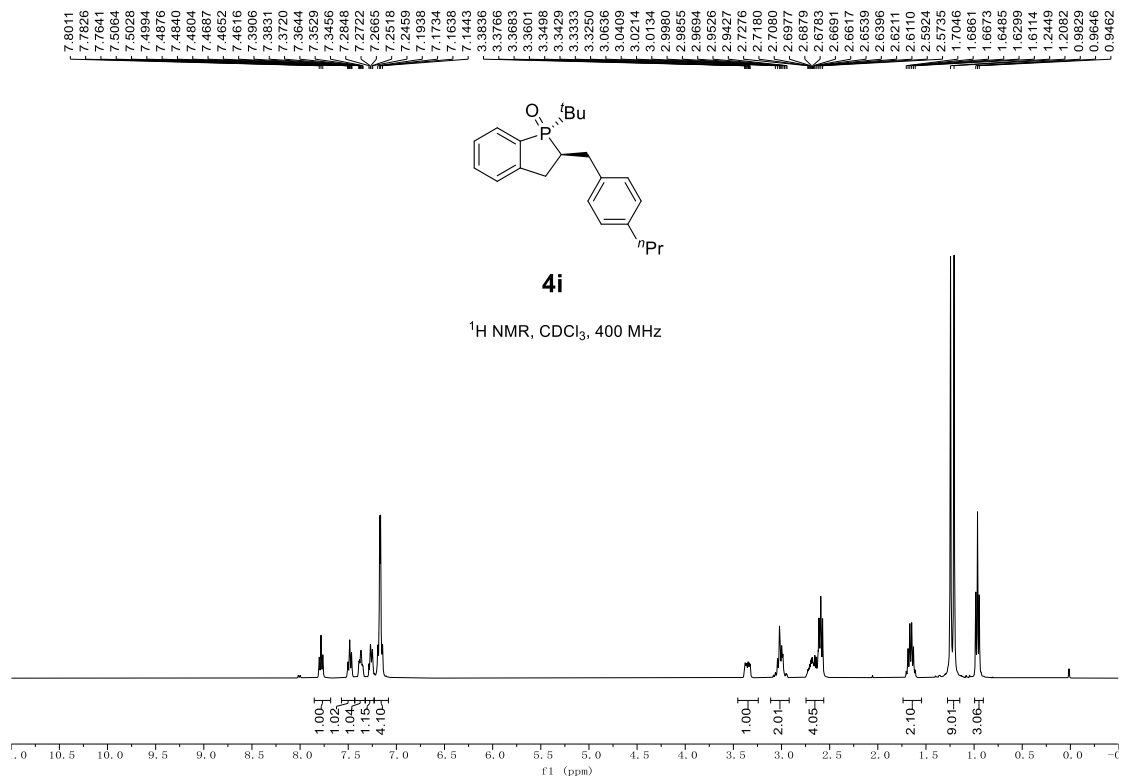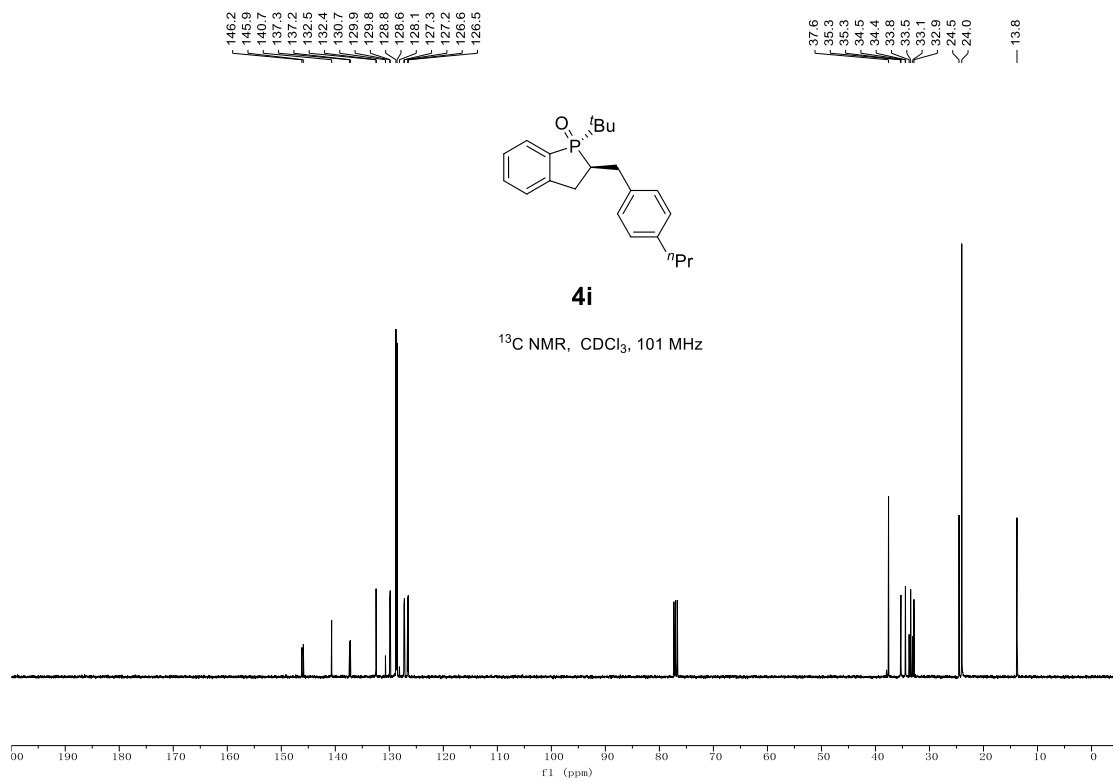

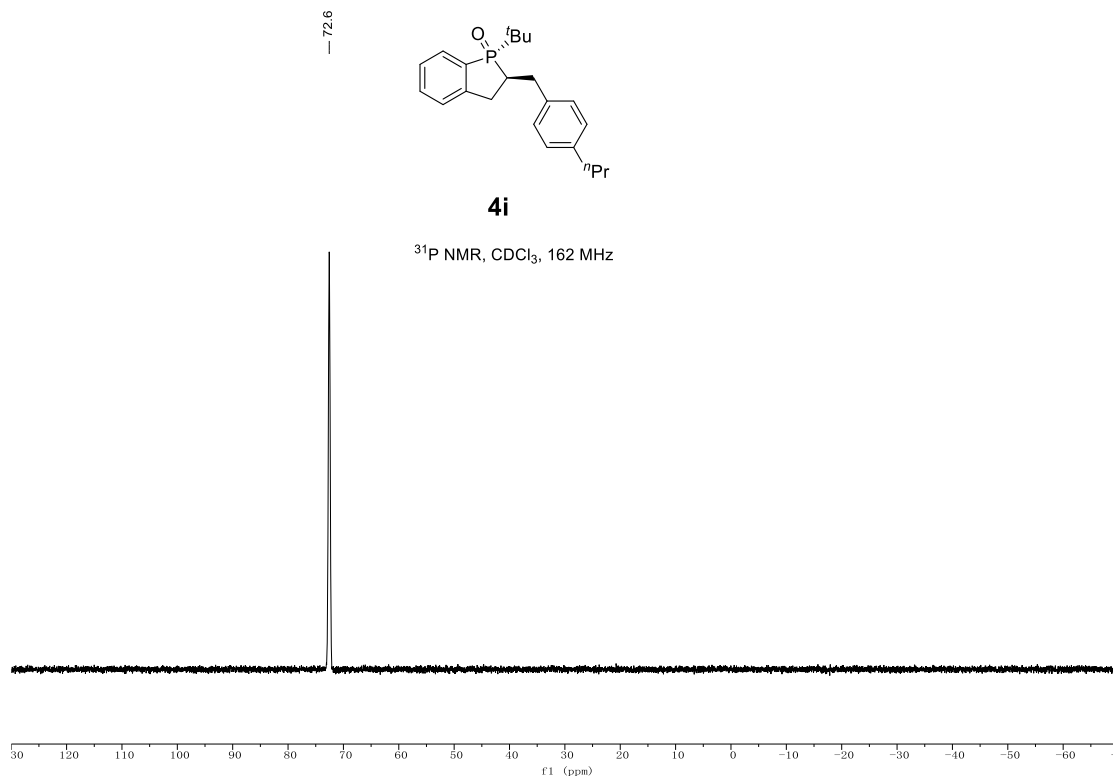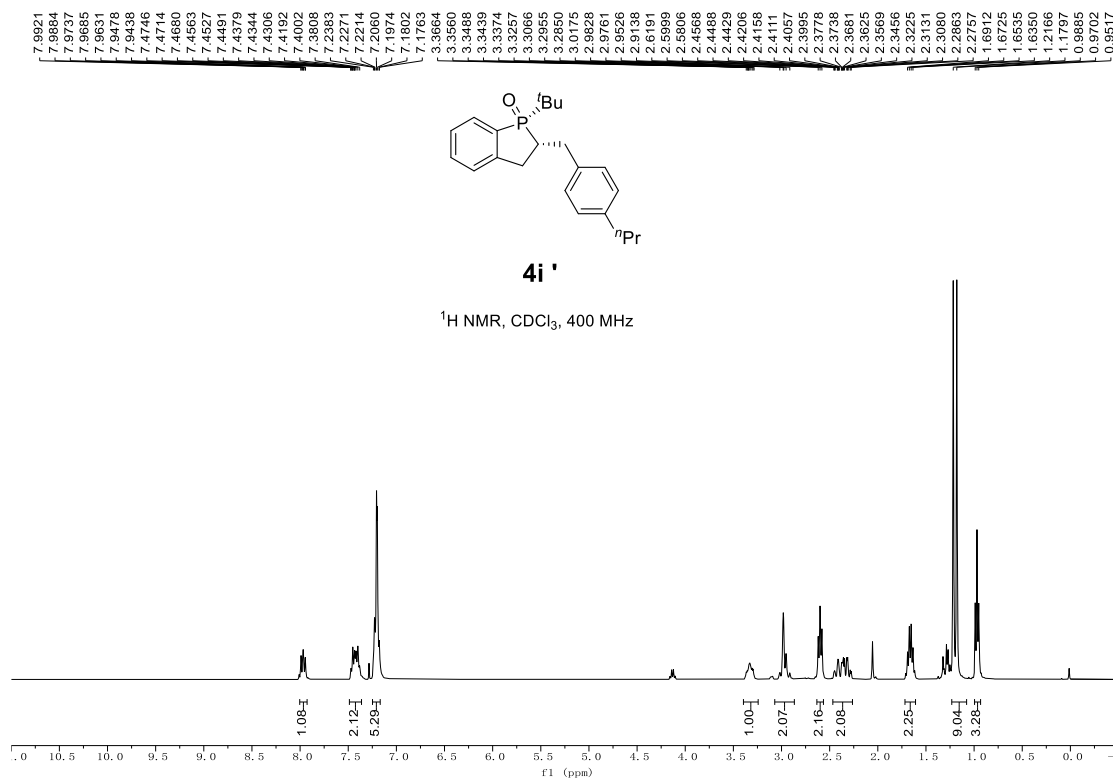

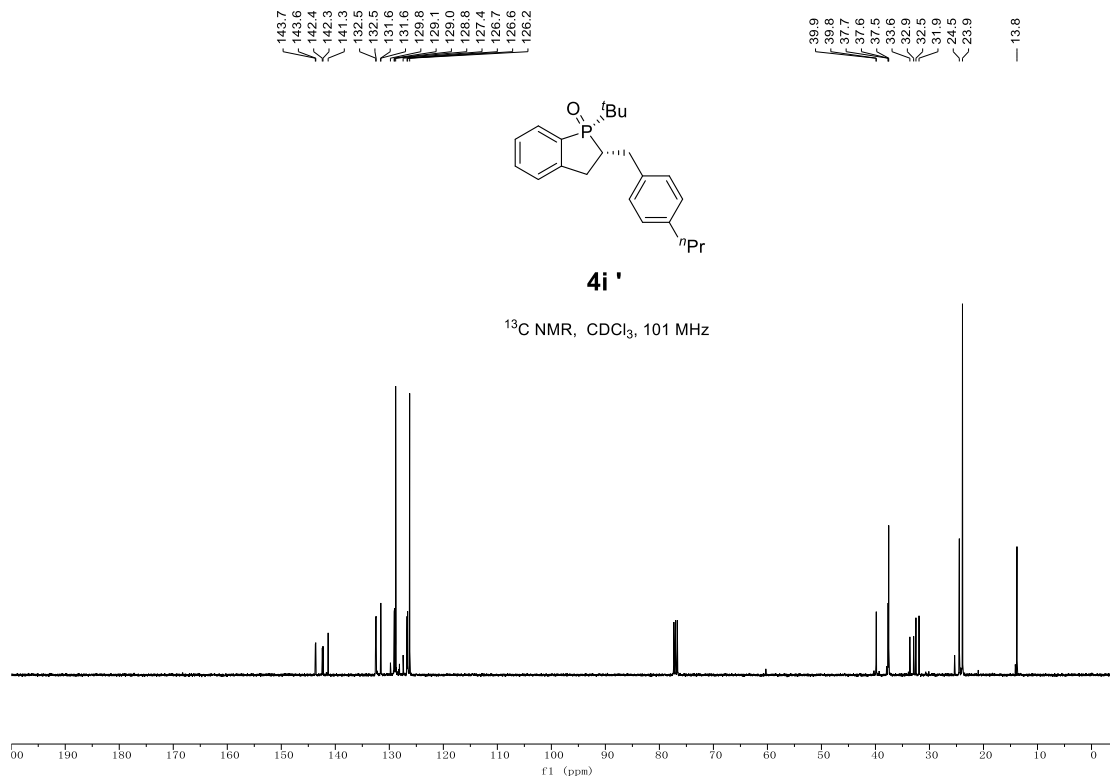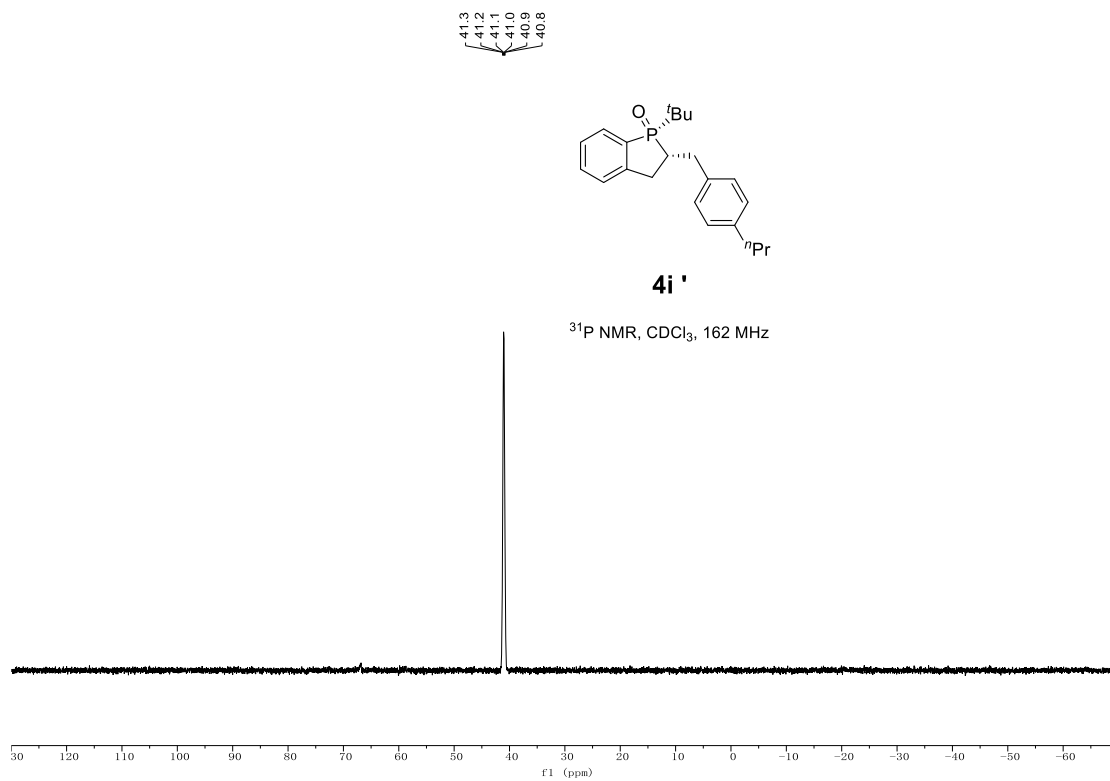

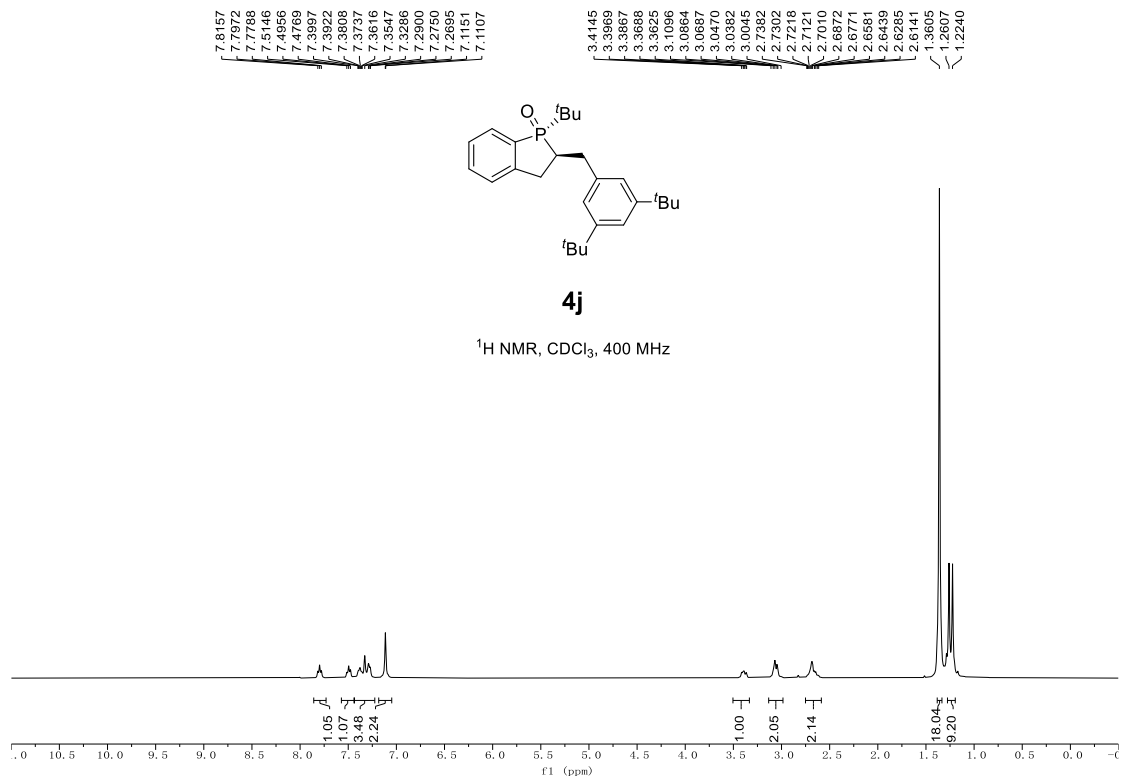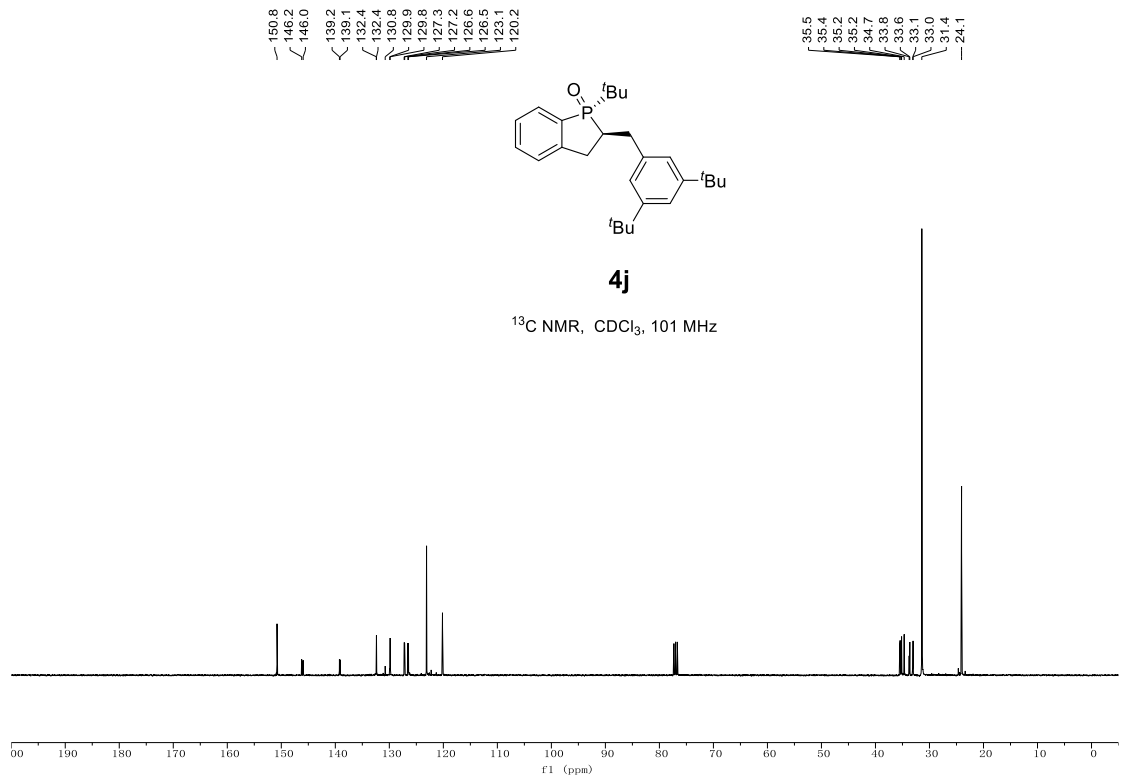

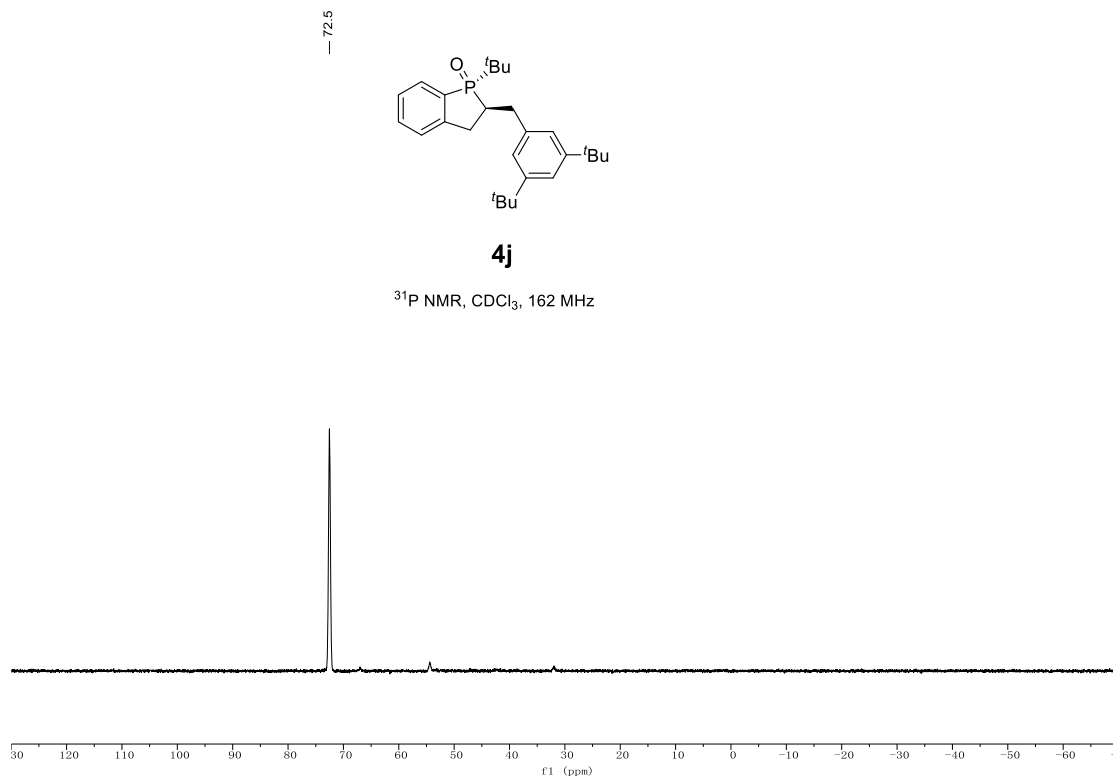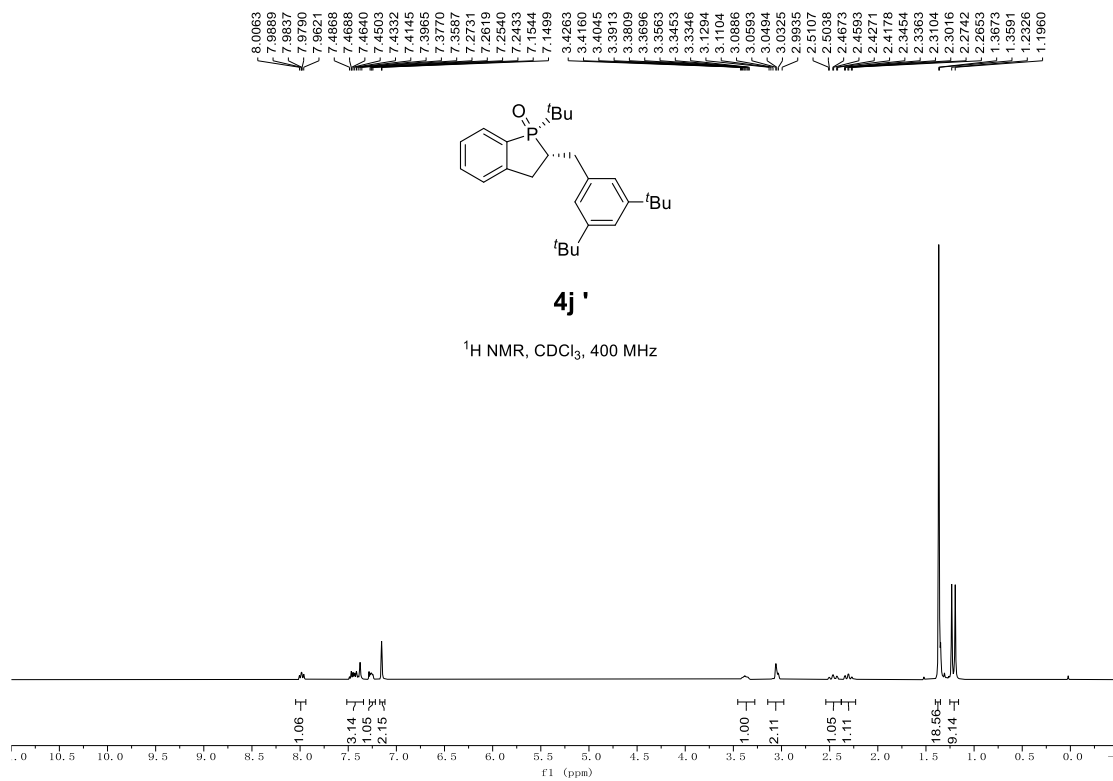

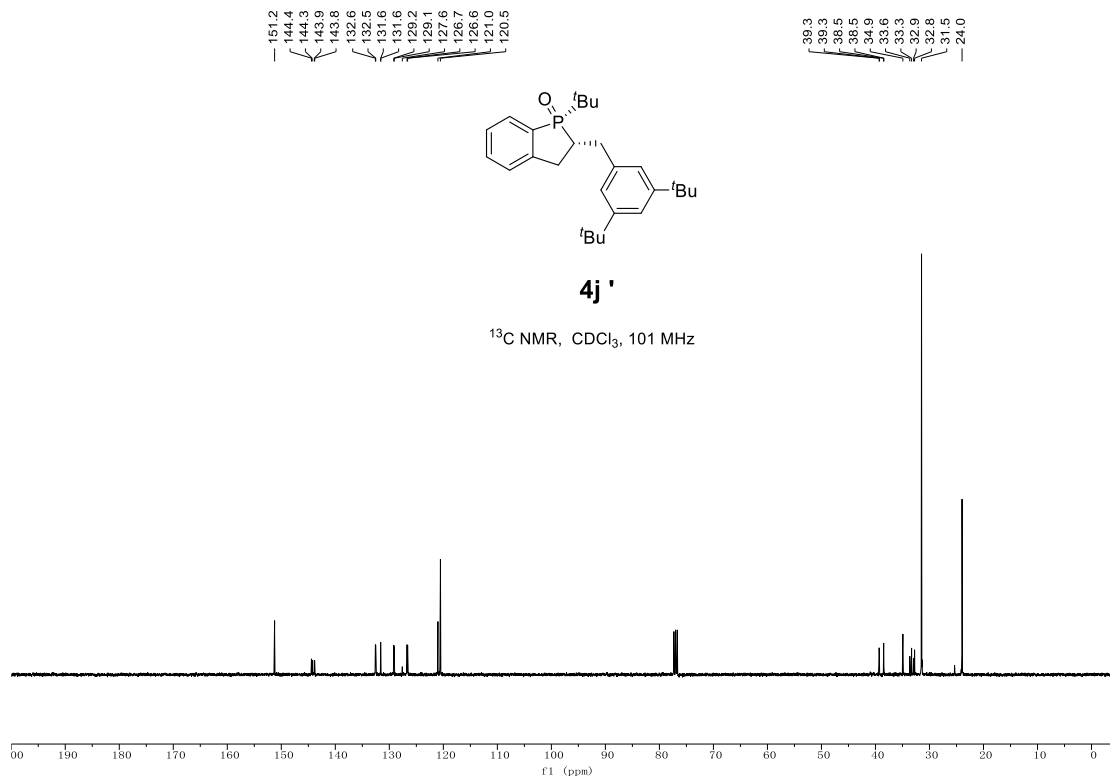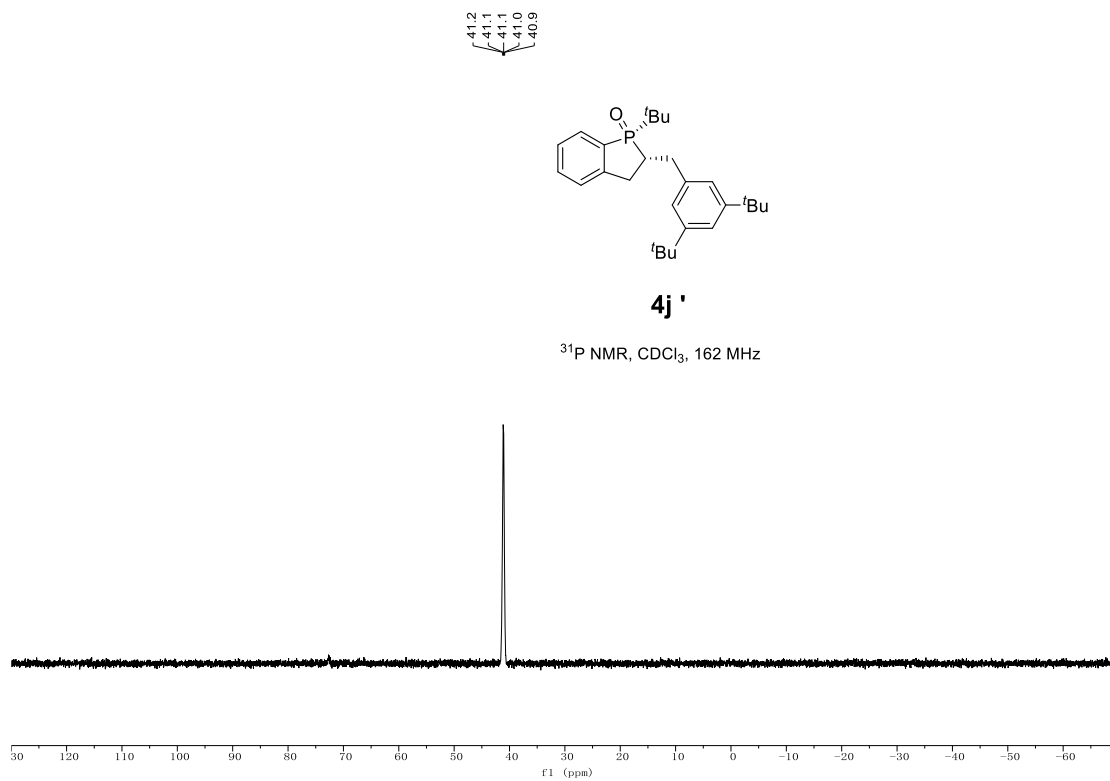



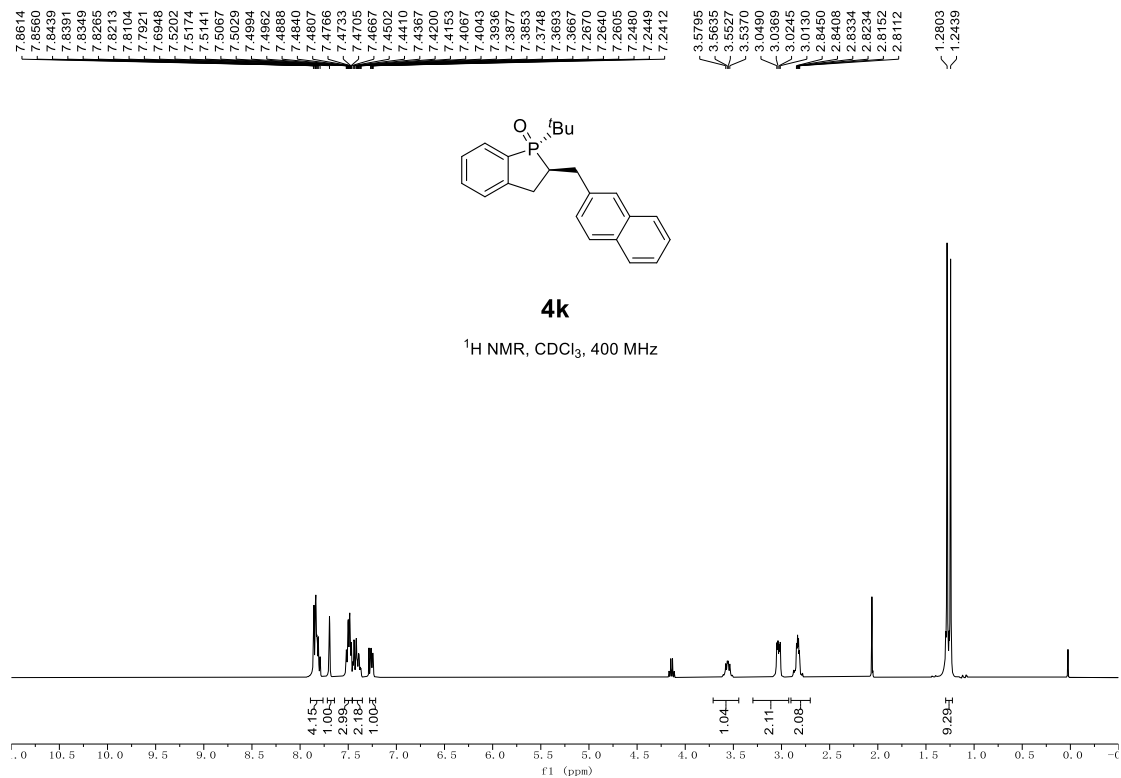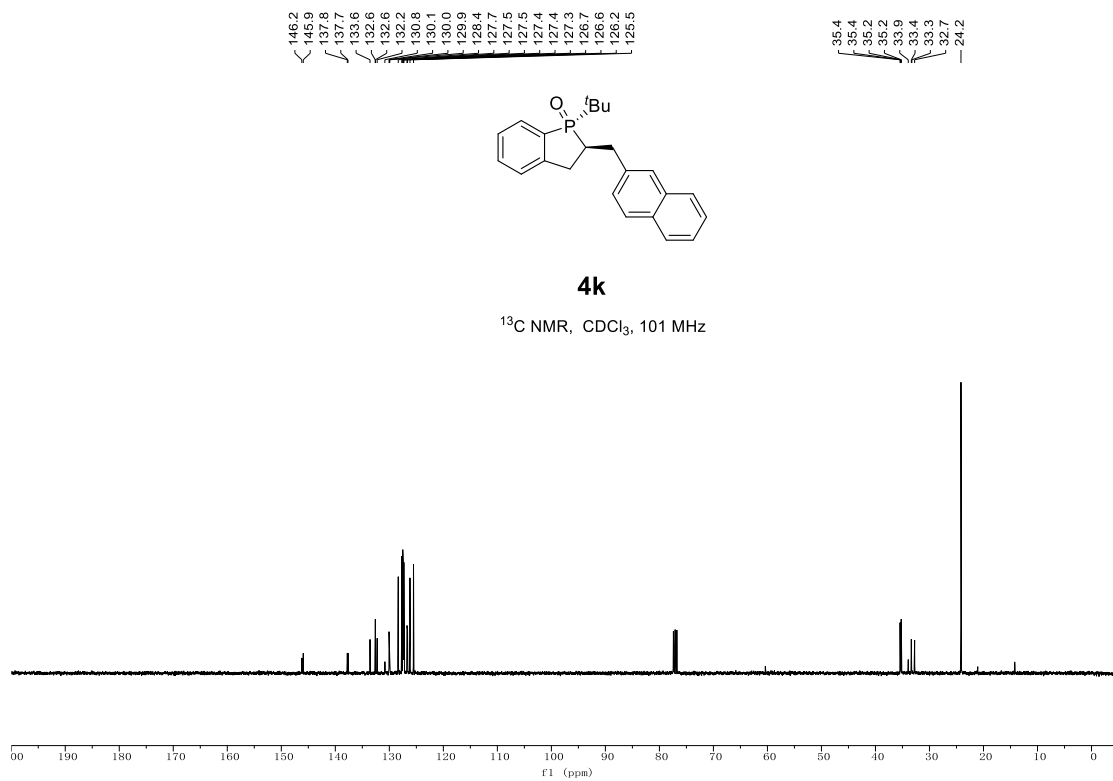

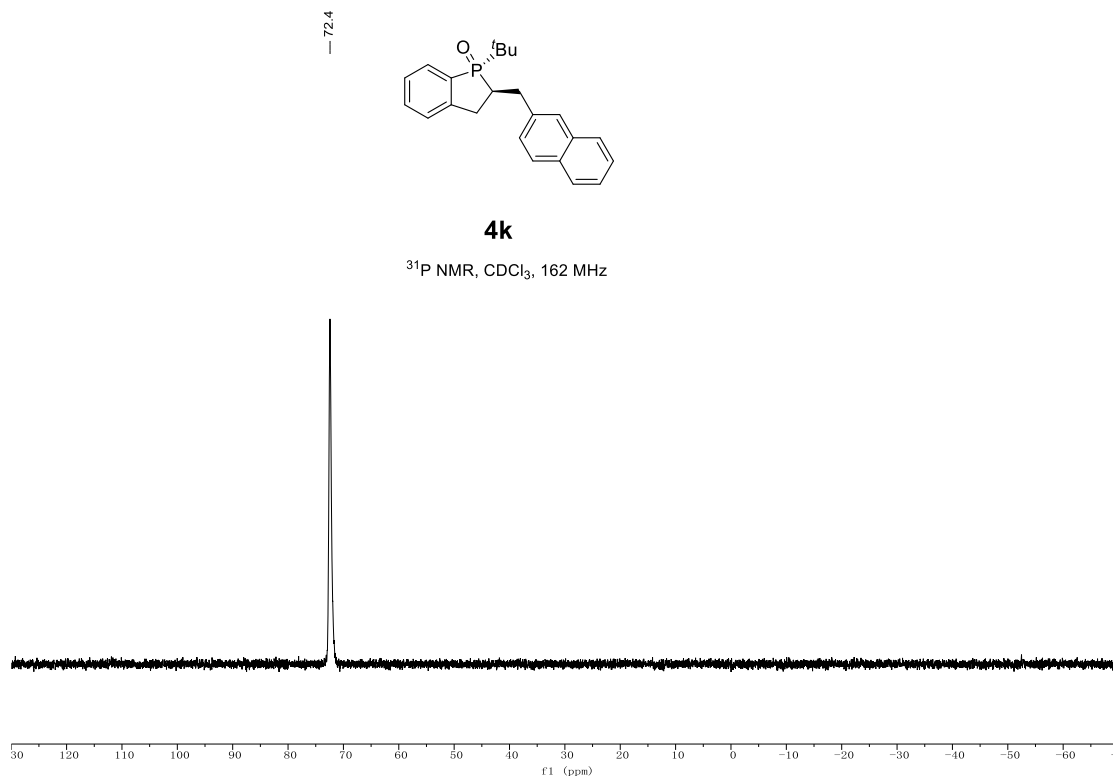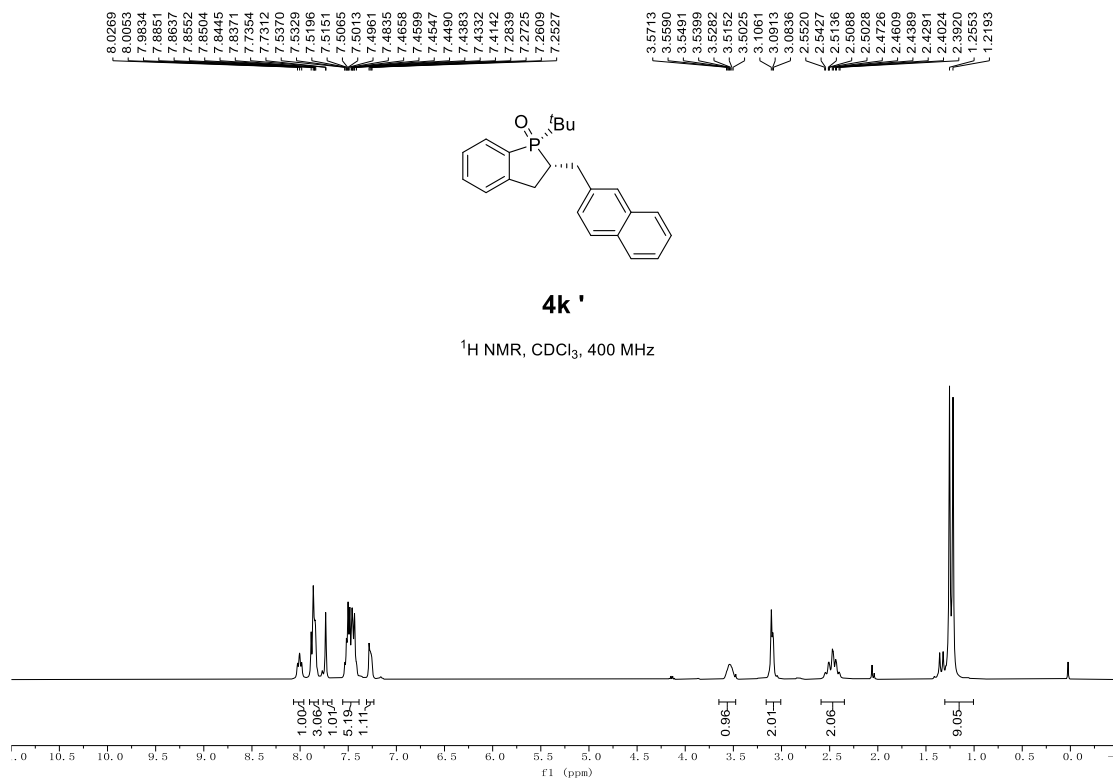

143.6  
143.6  
142.7  
142.5  
133.6  
132.7  
132.6  
132.5  
131.8  
129.3  
129.2  
128.7  
127.7  
126.9  
126.8  
126.4  
125.8  
125.2  
124.7

40.0  
39.9  
39.8  
39.8  
33.2  
32.5  
32.0  
24.5  
24.5  
24.1

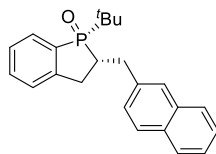

**4k'**

<sup>13</sup>C NMR, CDCl<sub>3</sub>, 101 MHz

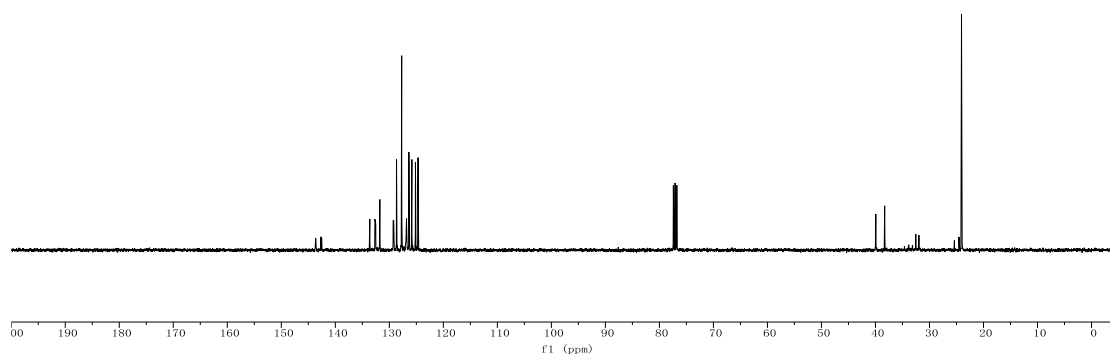

40.8

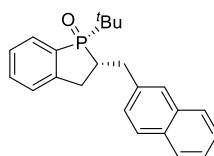

**4k'**

<sup>31</sup>P NMR, CDCl<sub>3</sub>, 162 MHz

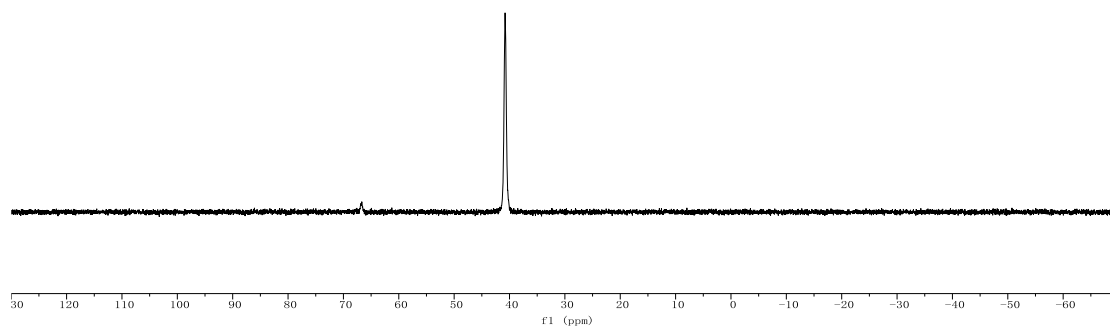



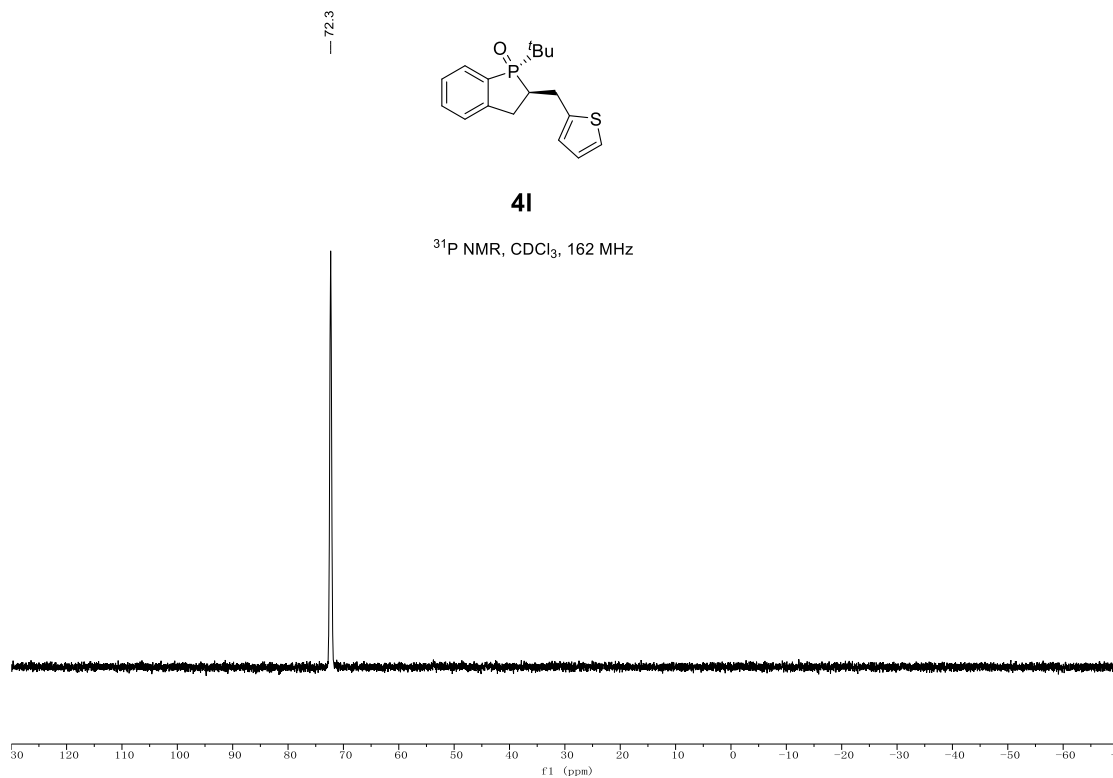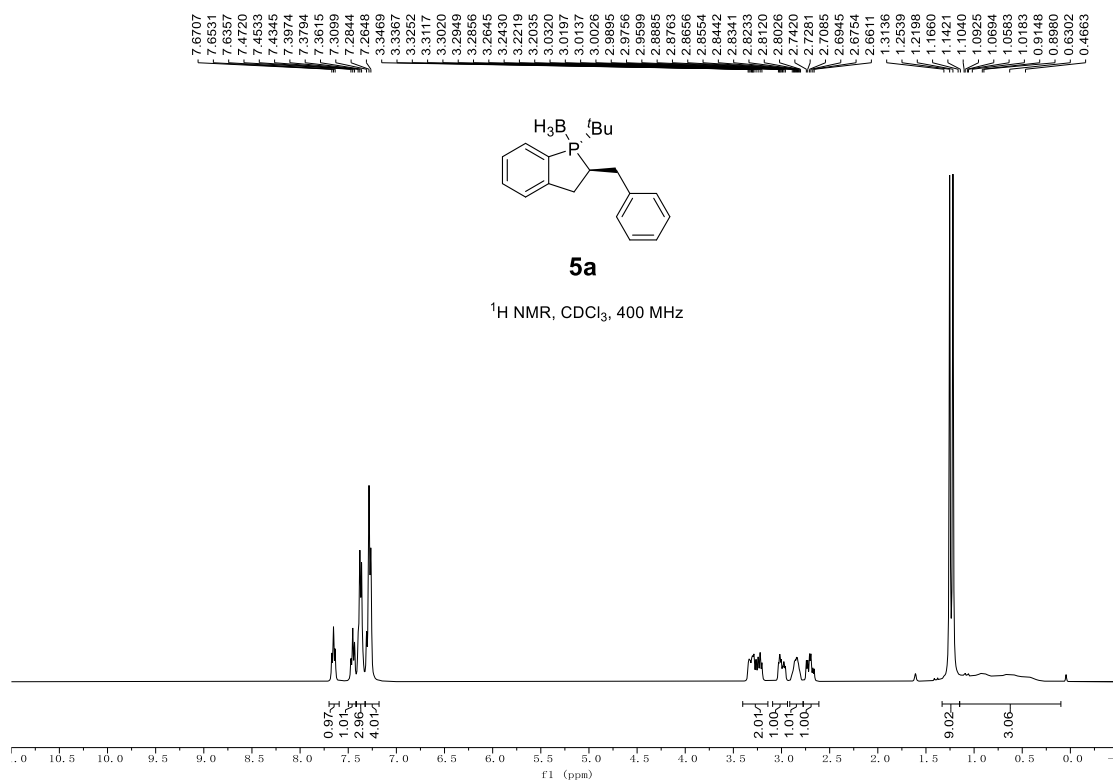

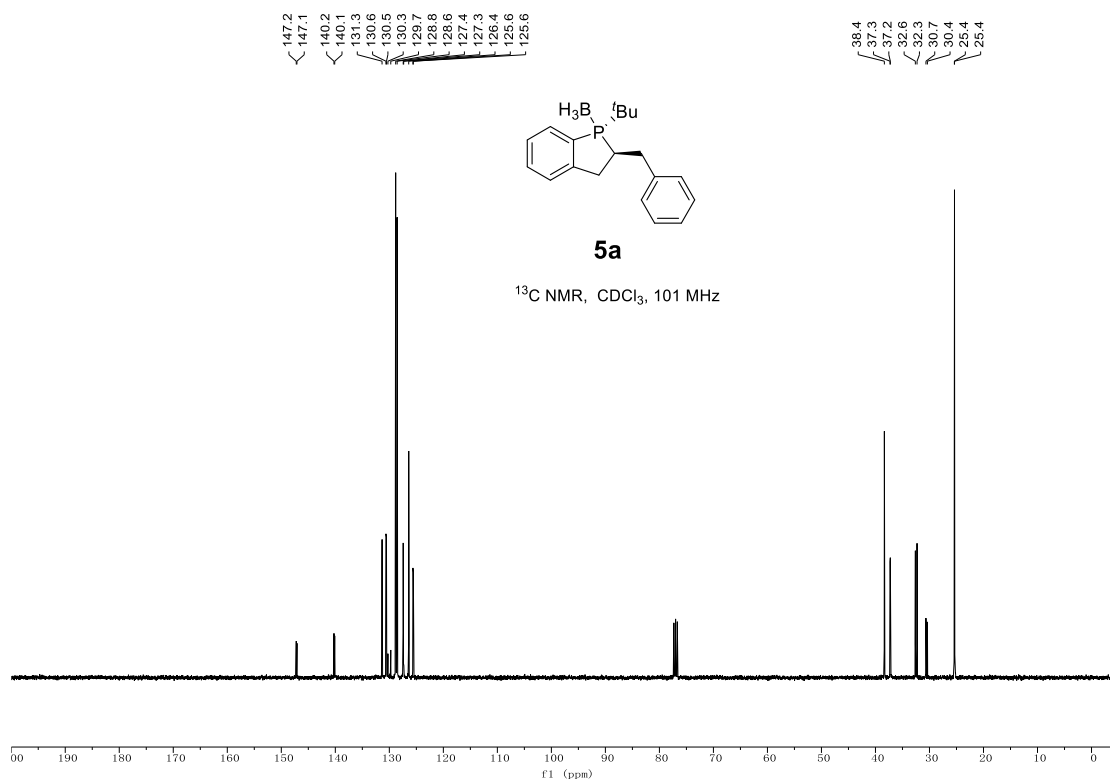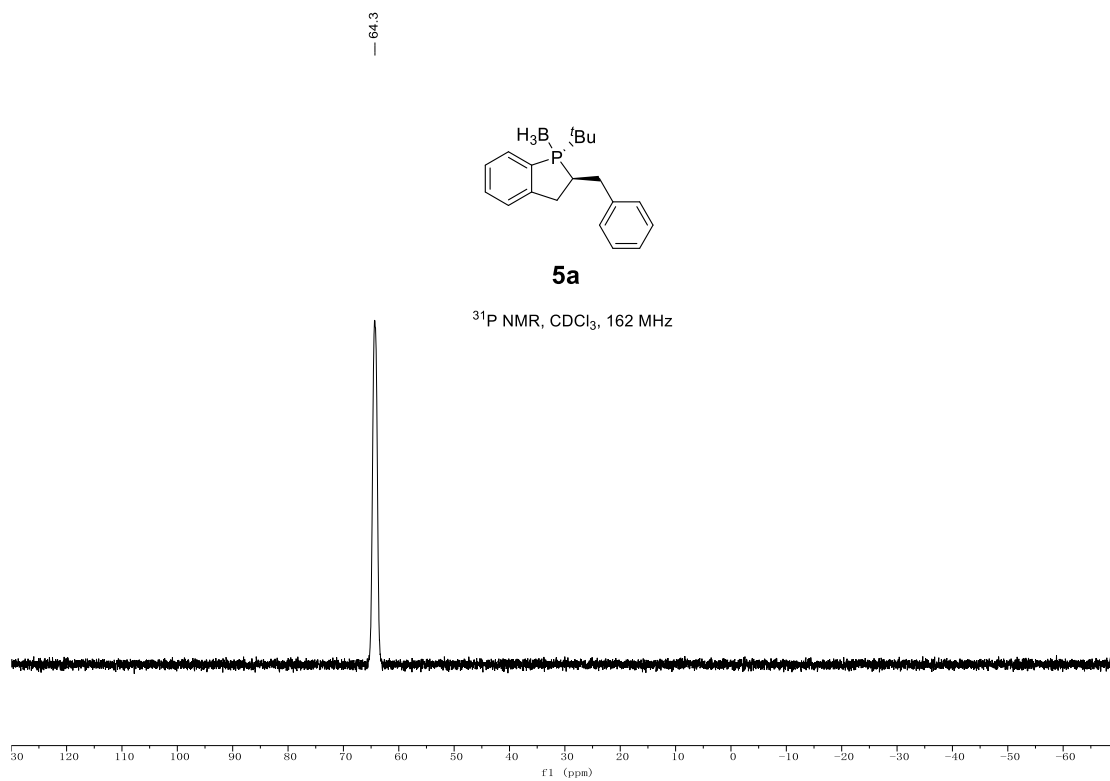

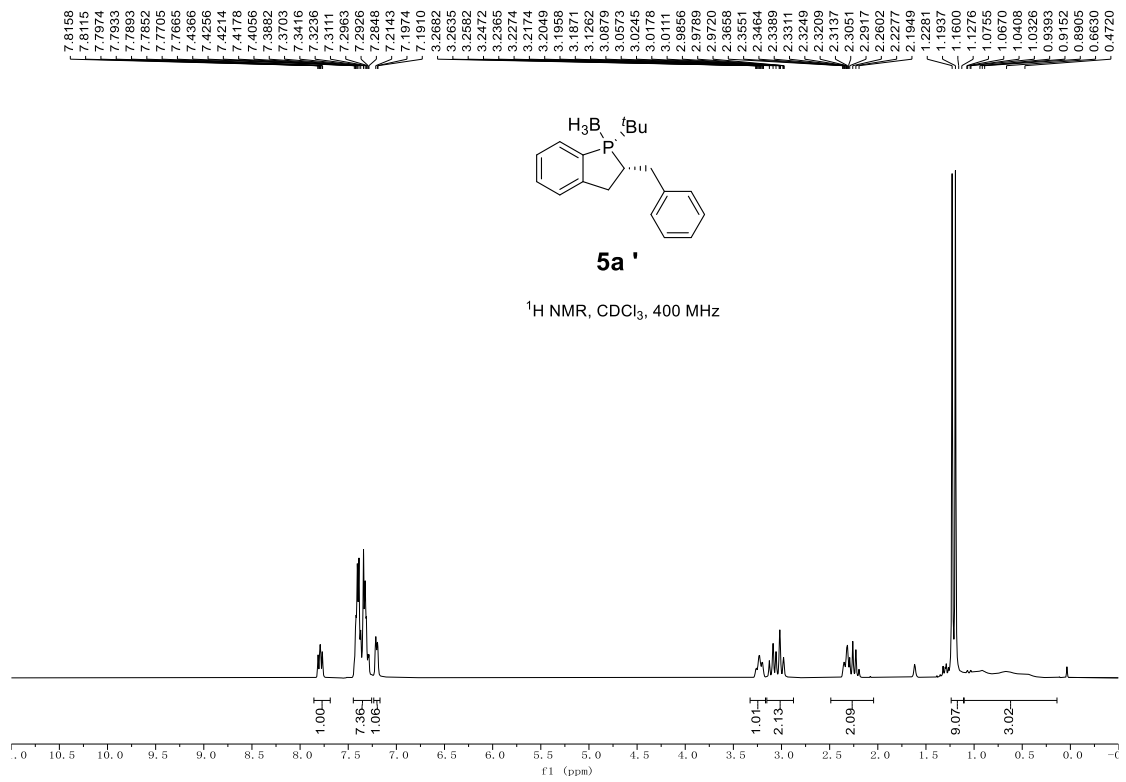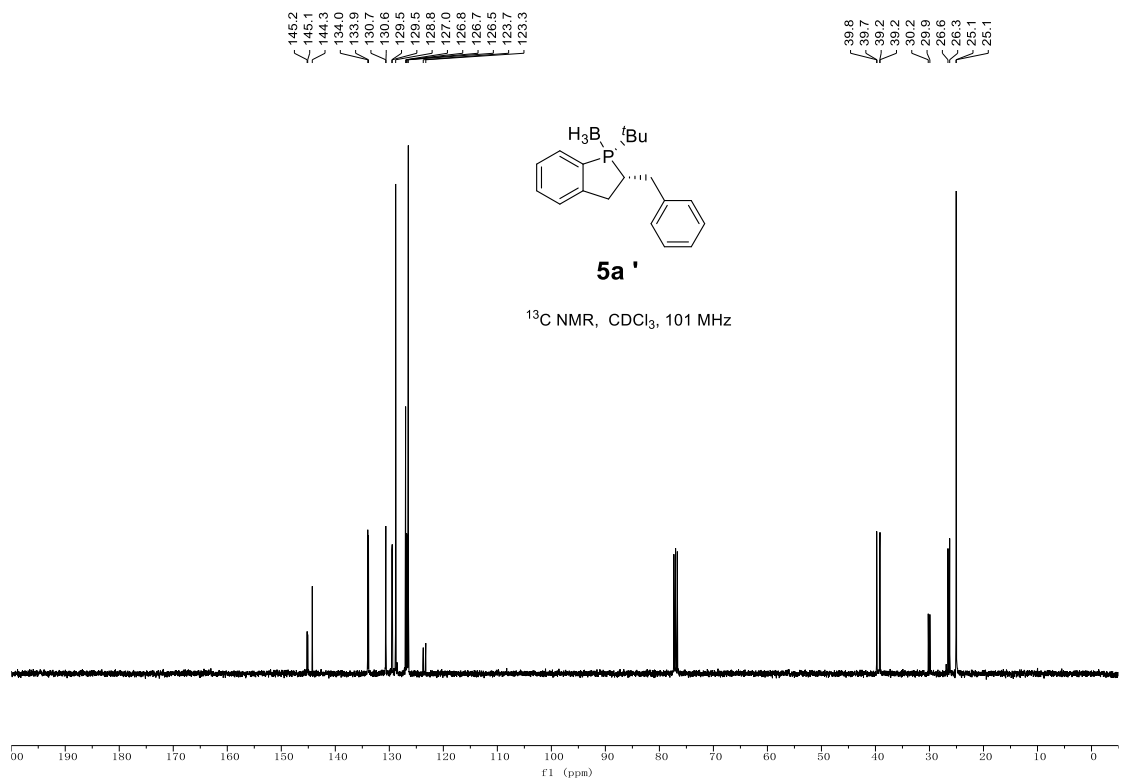

— 24.2

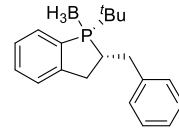

**5a'**

<sup>31</sup>P NMR, CDCl<sub>3</sub>, 162 MHz

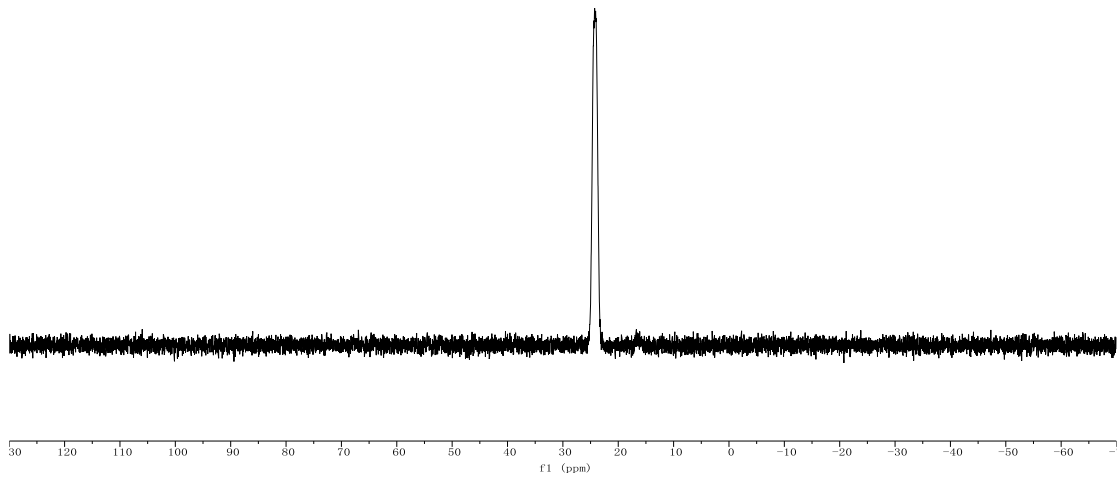

7.6593  
7.6417  
7.6240  
7.6040  
7.4609  
7.4422  
7.4233  
7.3794  
7.3726  
7.3613  
7.3537  
7.3330  
7.3102  
7.2938  
7.2861  
7.2787  
7.2692  
7.1869  
7.1846  
7.1500  
7.1441  
3.4458  
3.4380  
3.4313  
3.4223  
3.4103  
3.4027  
3.3952  
3.3871  
3.1625  
3.1439  
3.1287  
3.1085  
3.0972  
3.0854  
3.0774  
3.0666  
3.0576  
3.0366  
3.0158  
3.0033  
2.9885  
2.9591  
2.9411  
2.8534  
2.8387  
2.8256  
2.8186  
2.8069  
2.7922  
1.2594  
1.2250  
1.2056  
1.1186  
1.0981  
1.0634  
0.9000  
0.6163  
0.4272

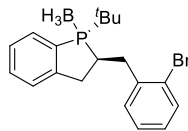

**5b**

<sup>1</sup>H NMR, CDCl<sub>3</sub>, 400 MHz

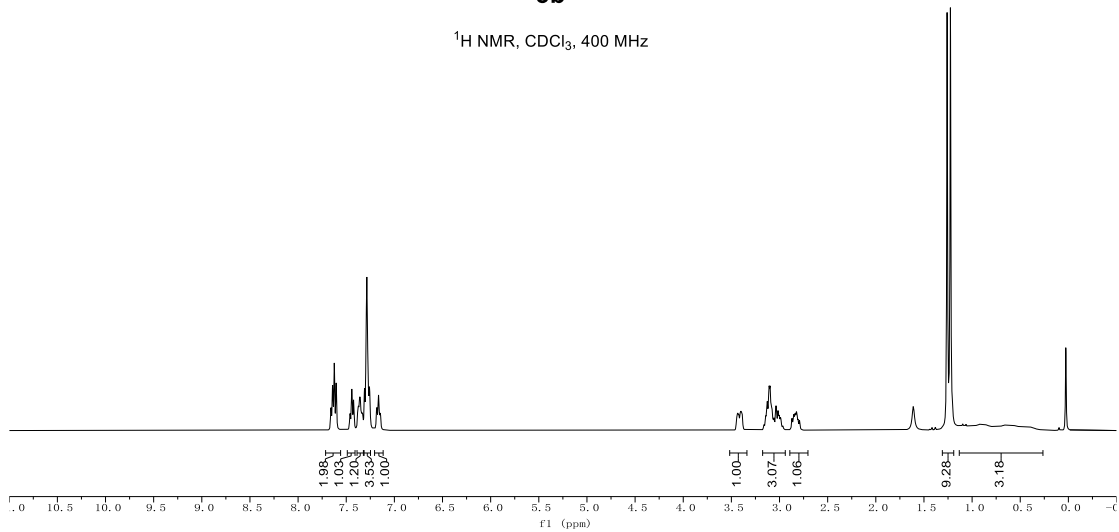



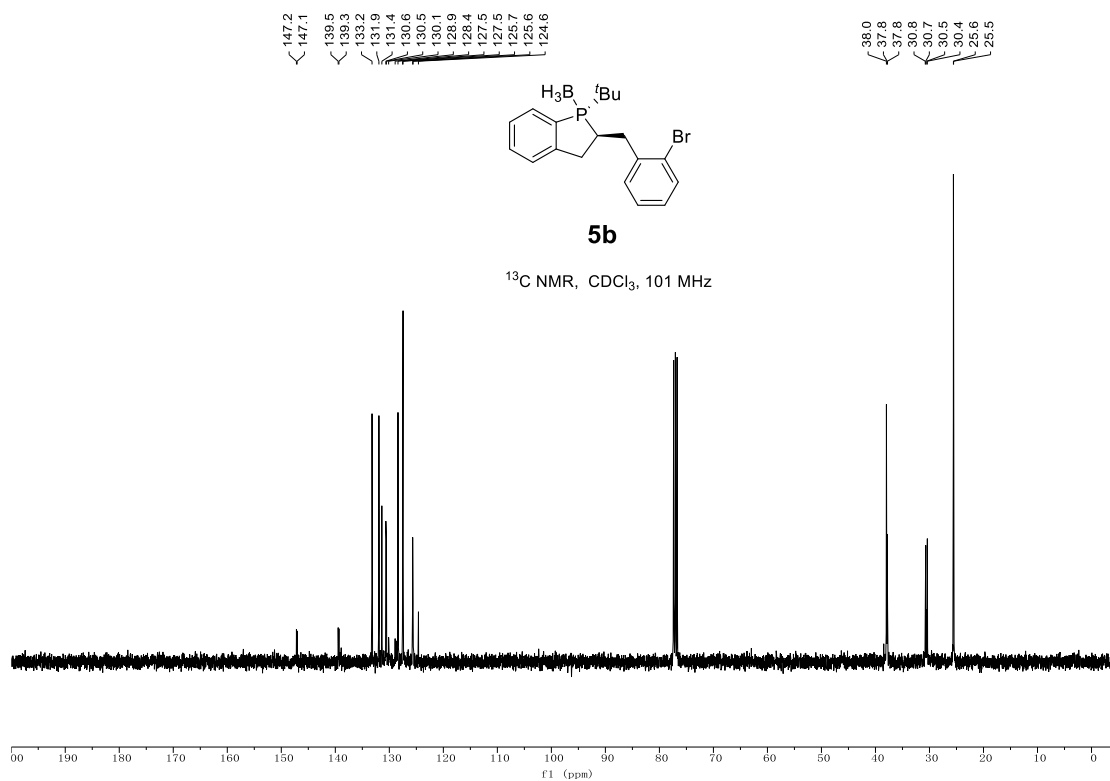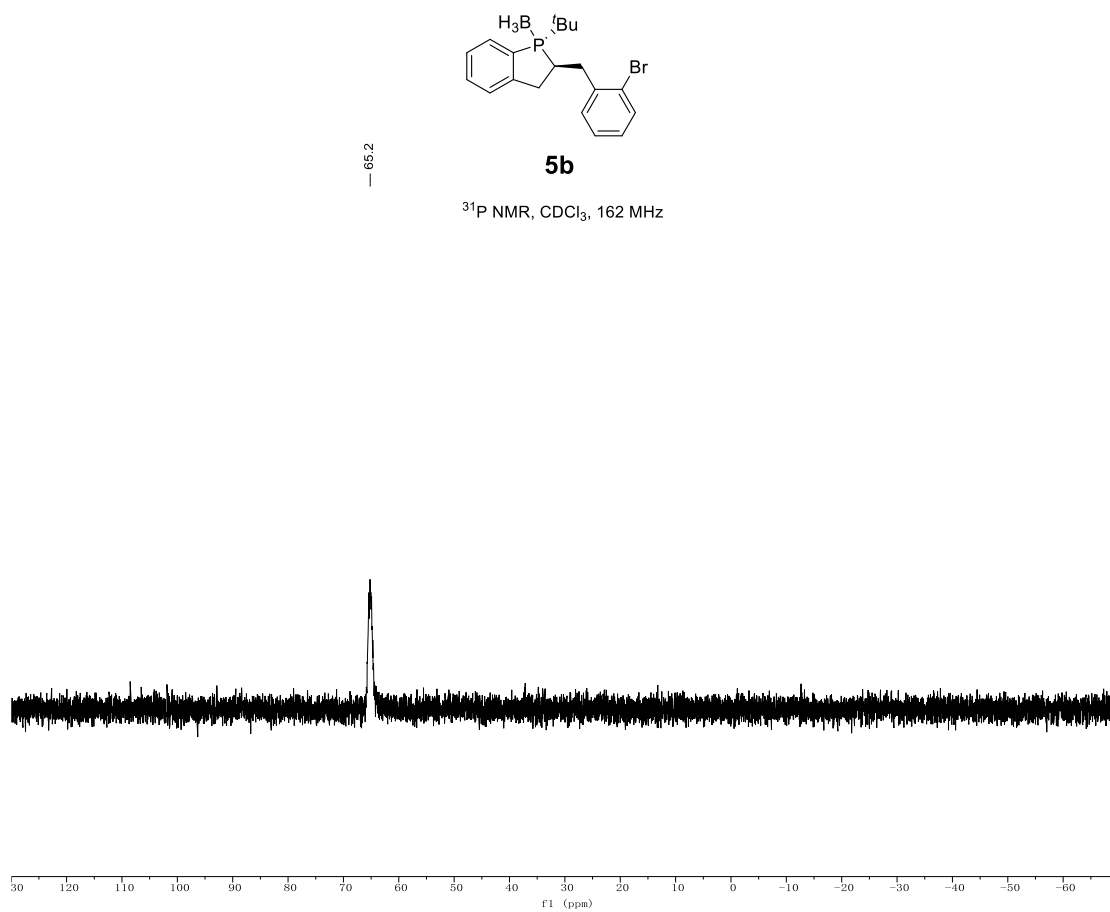

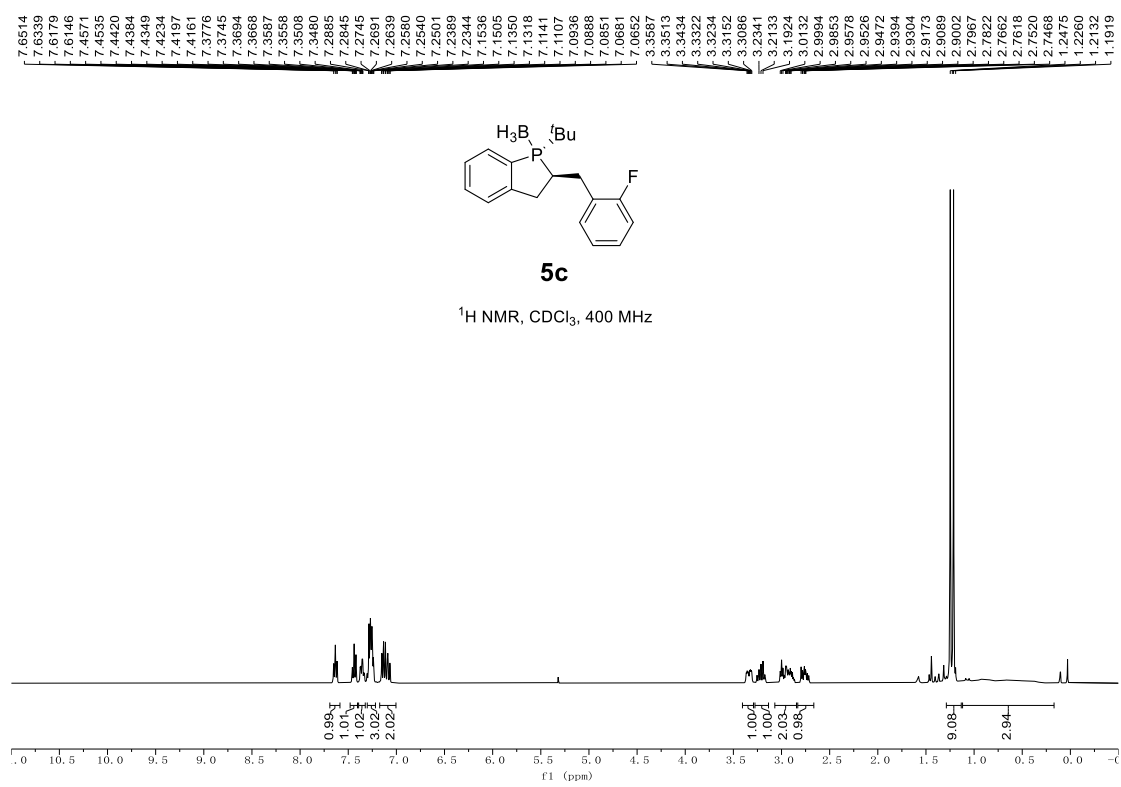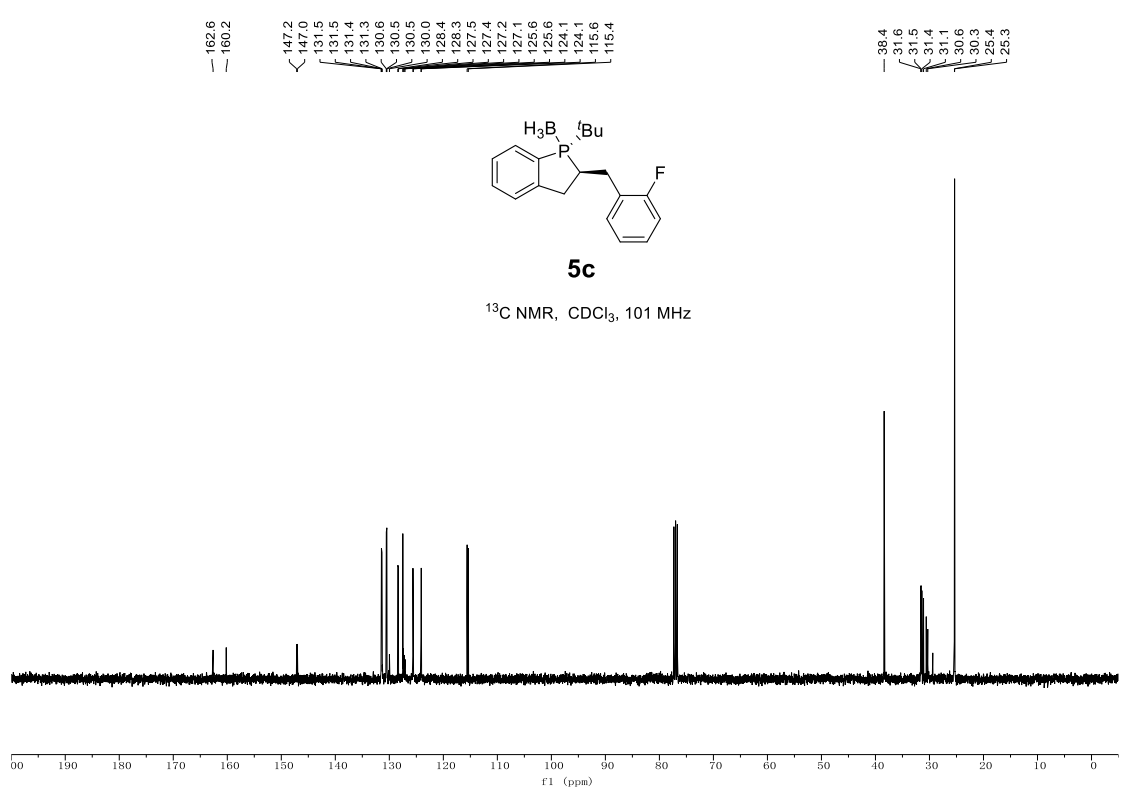

— 62.8

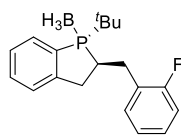

**5c**

<sup>31</sup>P NMR, CDCl<sub>3</sub>, 162 MHz

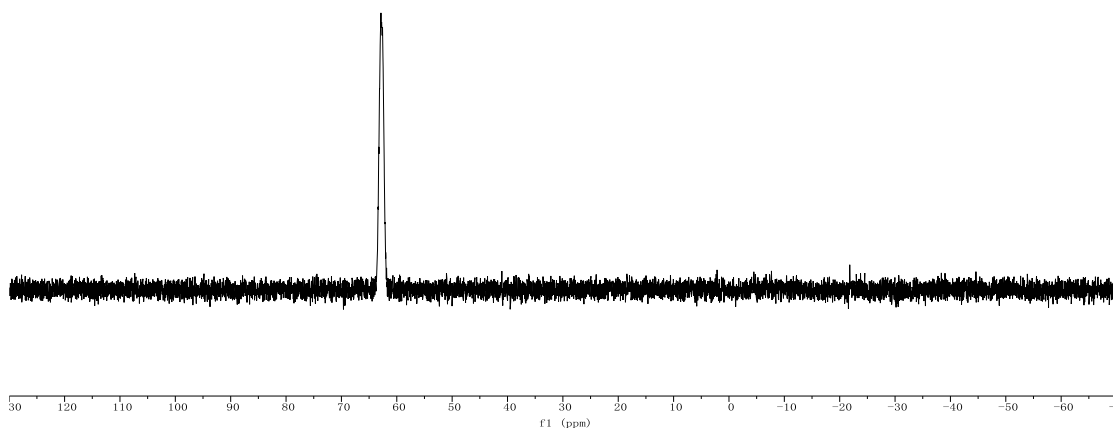

— -117.5

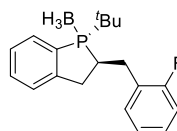

**5c**

<sup>19</sup>F NMR, CDCl<sub>3</sub>, 377 MHz

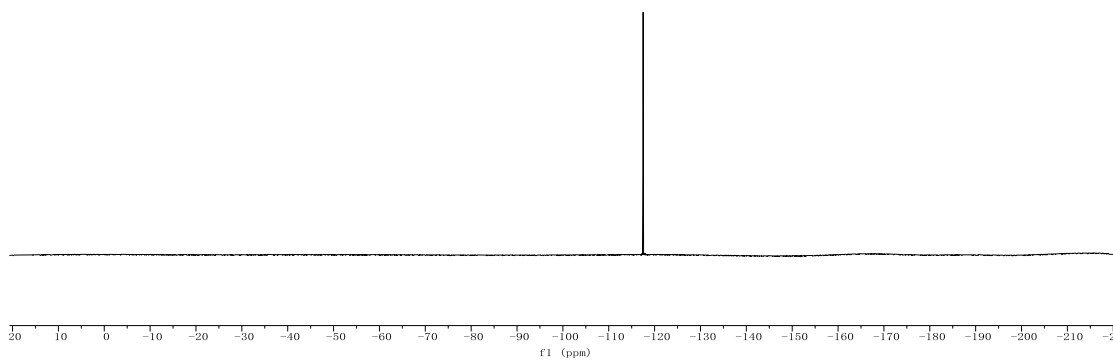

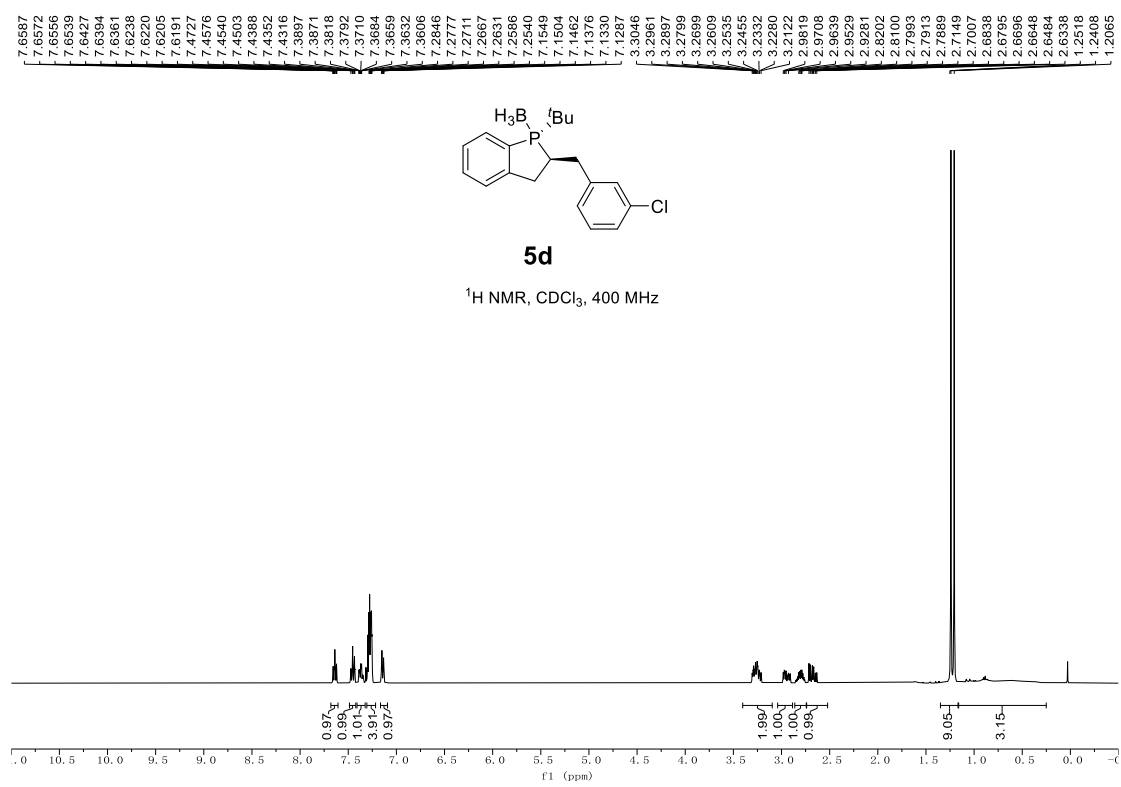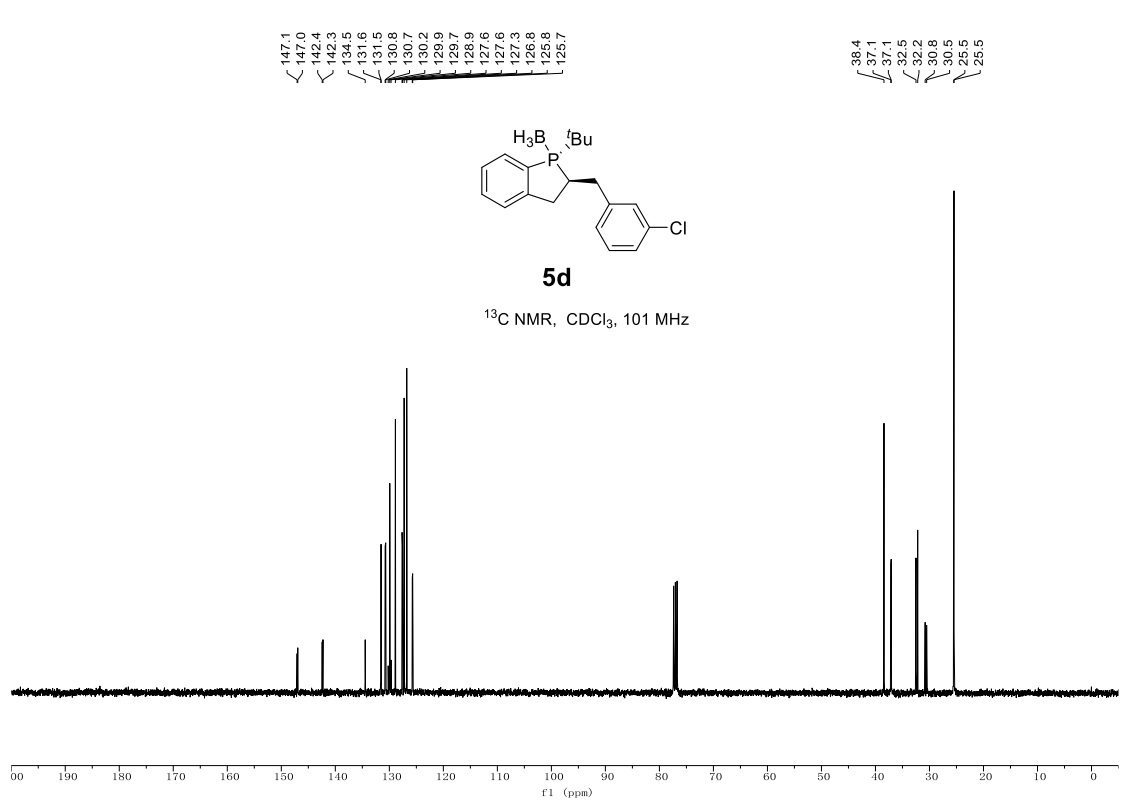

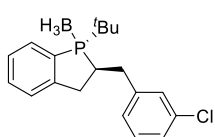

**5d**

<sup>31</sup>P NMR, CDCl<sub>3</sub>, 162 MHz

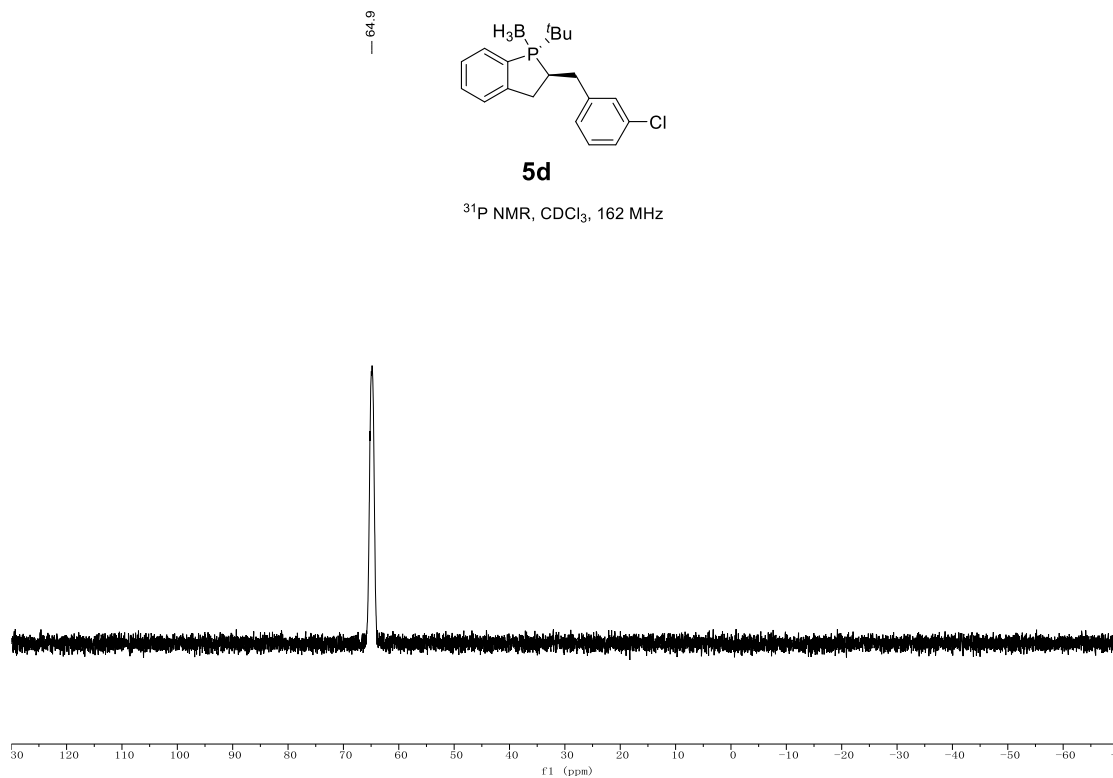

7.6650  
7.6474  
7.6300  
7.4714  
7.4678  
7.4644  
7.4527  
7.4489  
7.4453  
7.4338  
7.4301  
7.4264  
7.3870  
7.3842  
7.3781  
7.3670  
7.3596  
7.3478  
7.3408  
7.2837  
7.2795  
7.2618  
7.2494  
7.1842  
7.0942  
7.0769  
7.0554  
3.2992  
3.2906  
3.2831  
3.2758  
3.2626  
3.2556  
3.2471  
3.2382  
3.2153  
3.1970  
3.0286  
3.0169  
3.0103  
2.9991  
2.9860  
2.9742  
2.9675  
2.9565  
2.8700  
2.8585  
2.8482  
2.8378  
2.8271  
2.8169  
2.8061  
2.7953  
2.6923  
2.6786  
2.6600  
2.6562  
2.6462  
2.6422  
2.6252  
2.6114  
2.4007  
1.2970  
1.2520  
1.2178  
1.1934  
1.1886  
1.0904  
0.9183  
0.9106  
0.9063  
0.8915

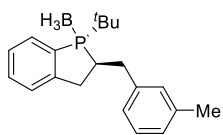

**5e**

<sup>1</sup>H NMR, CDCl<sub>3</sub>, 400 MHz

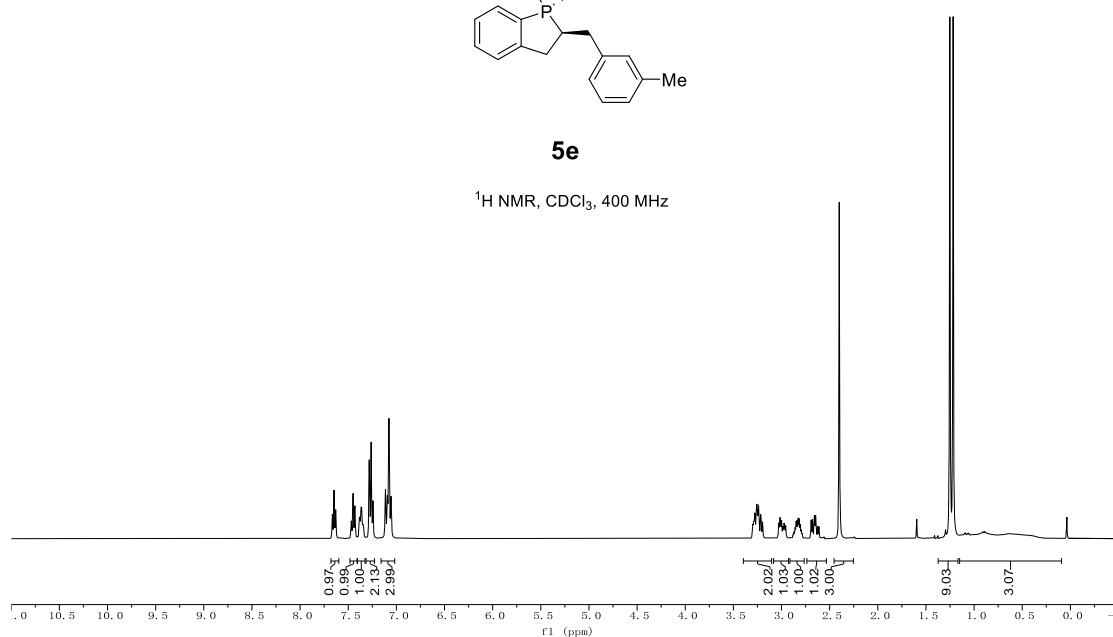

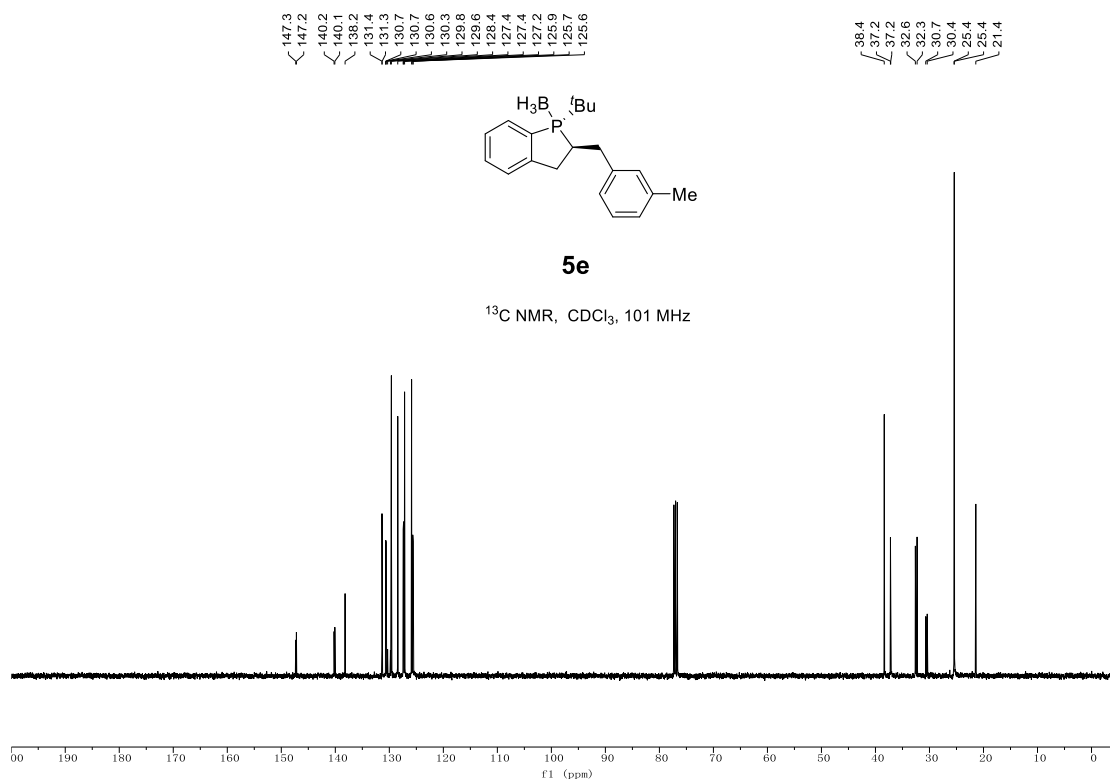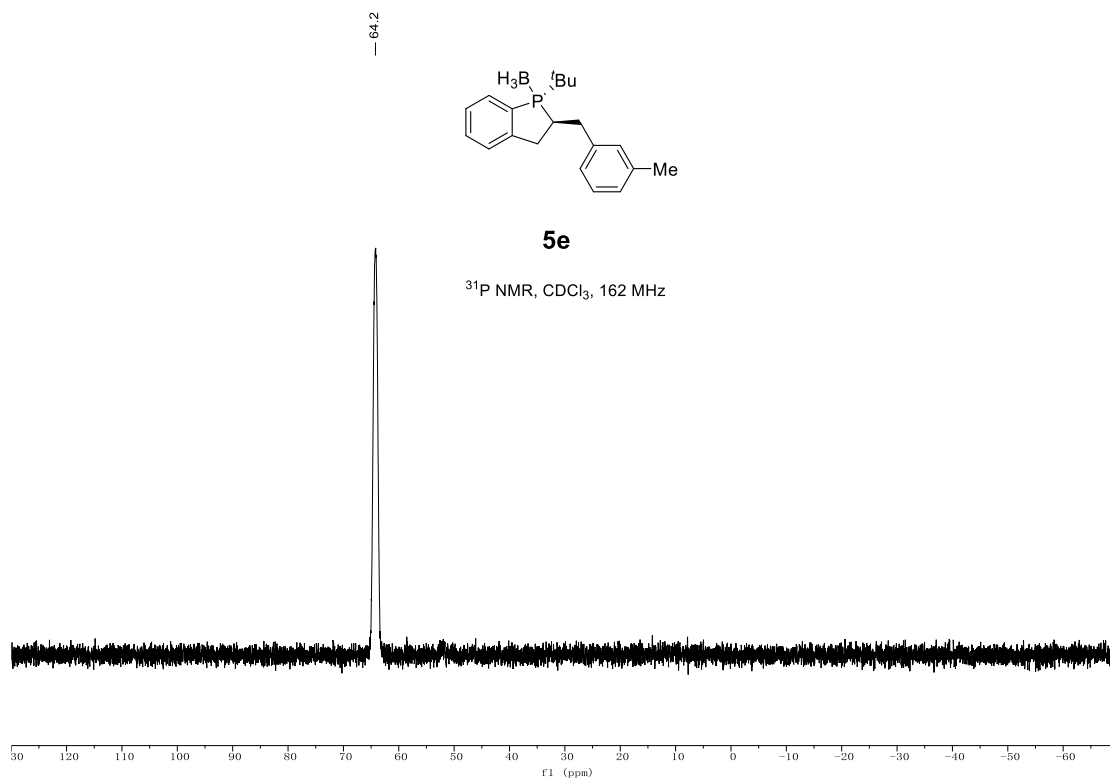

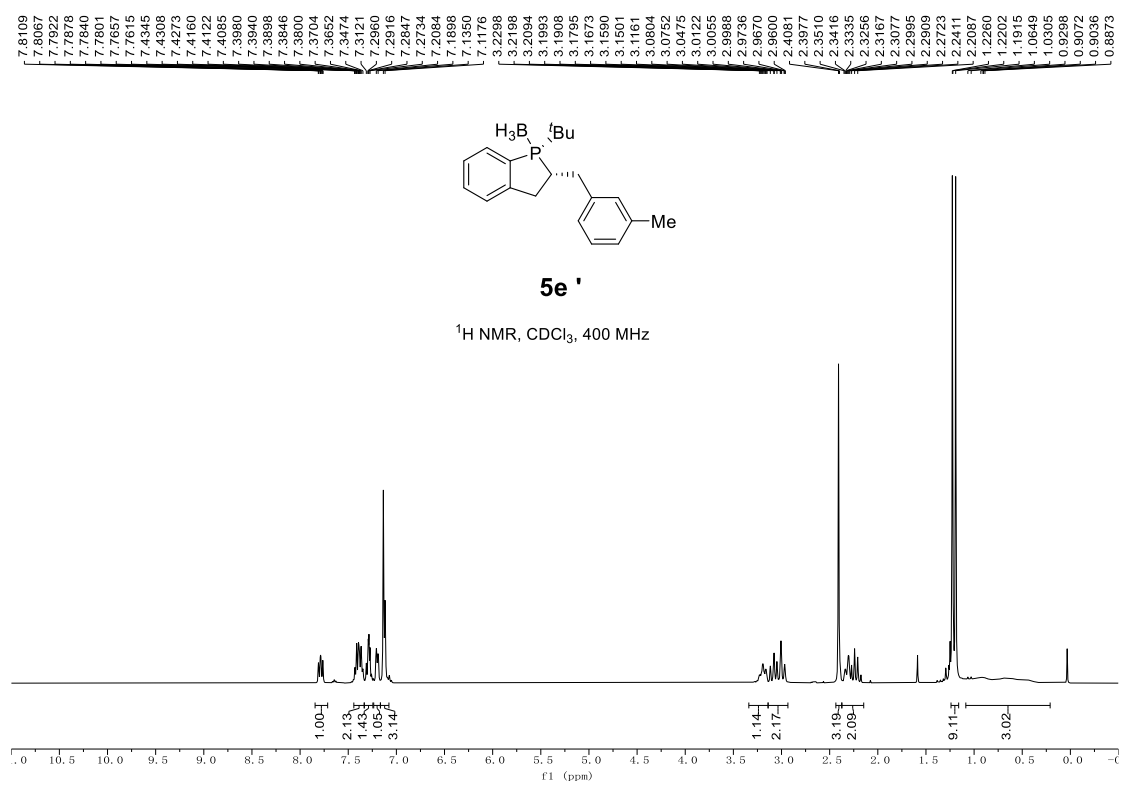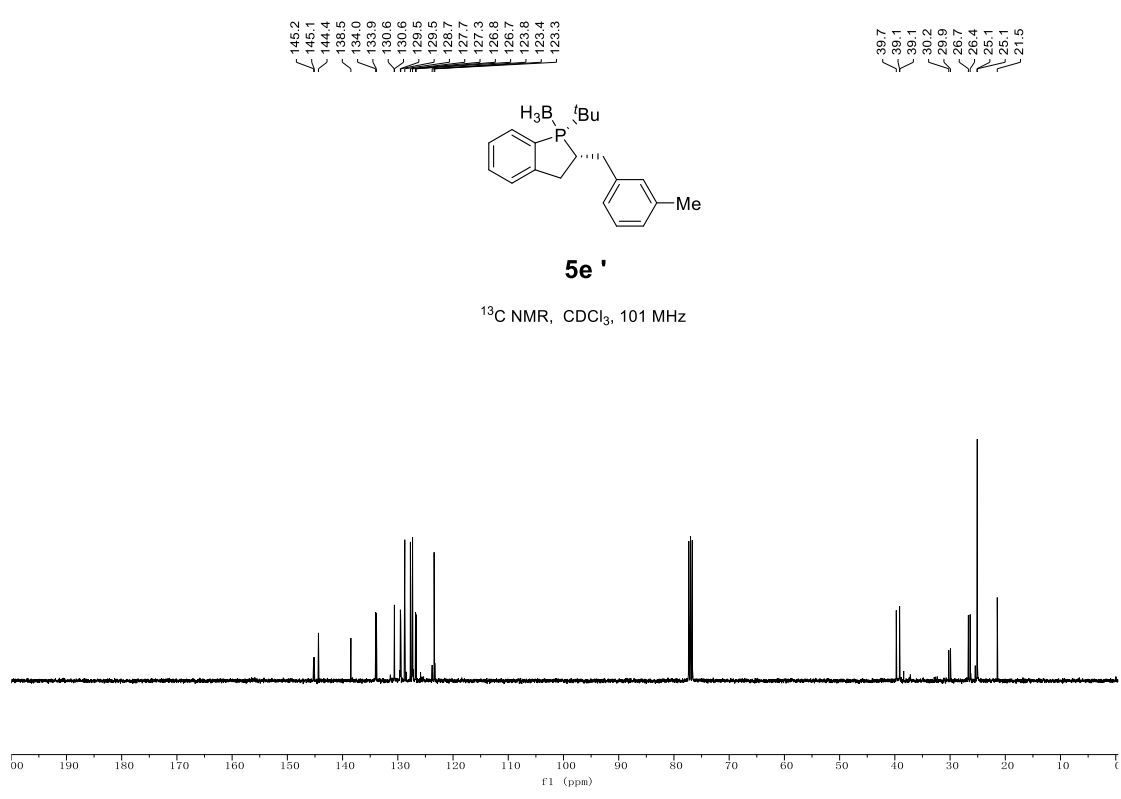

- 24.2

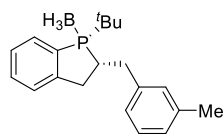

**5e'**

<sup>31</sup>P NMR, CDCl<sub>3</sub>, 162 MHz

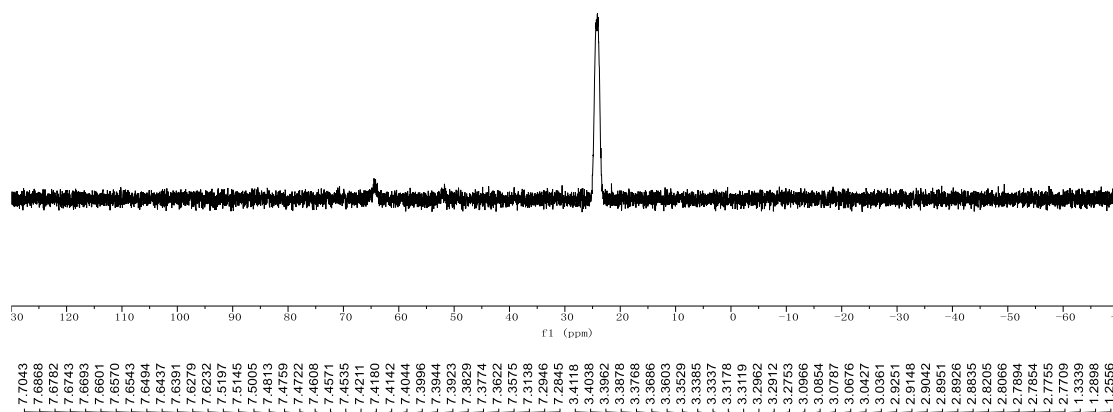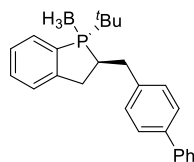

**5f**

<sup>1</sup>H NMR, CDCl<sub>3</sub>, 400 MHz

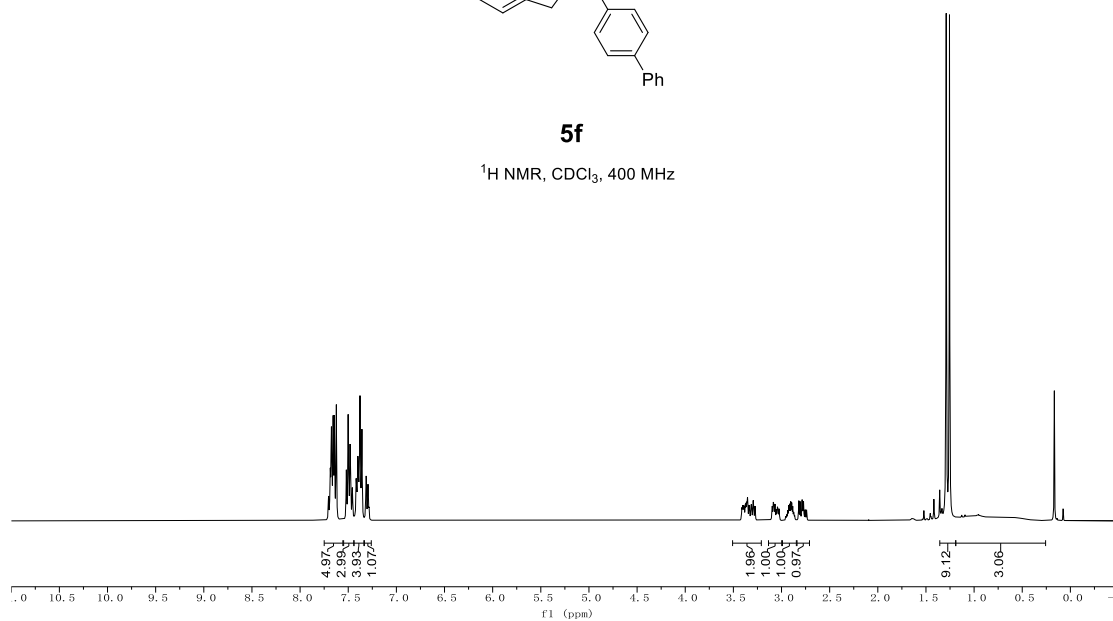



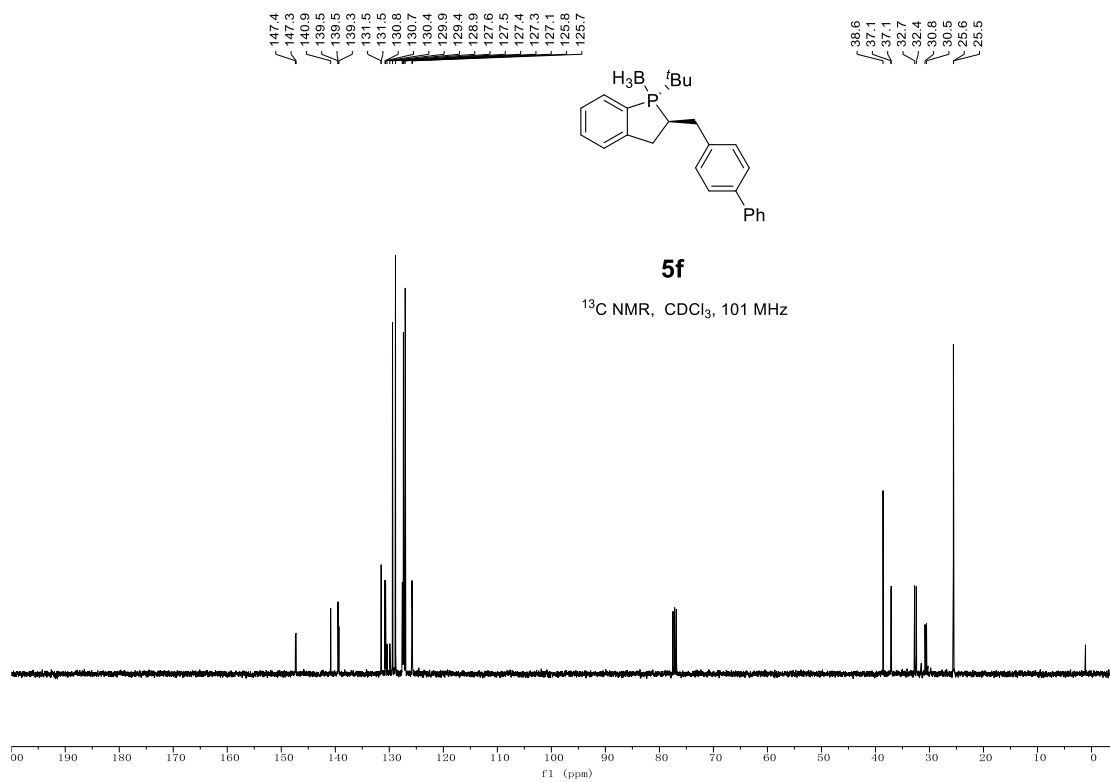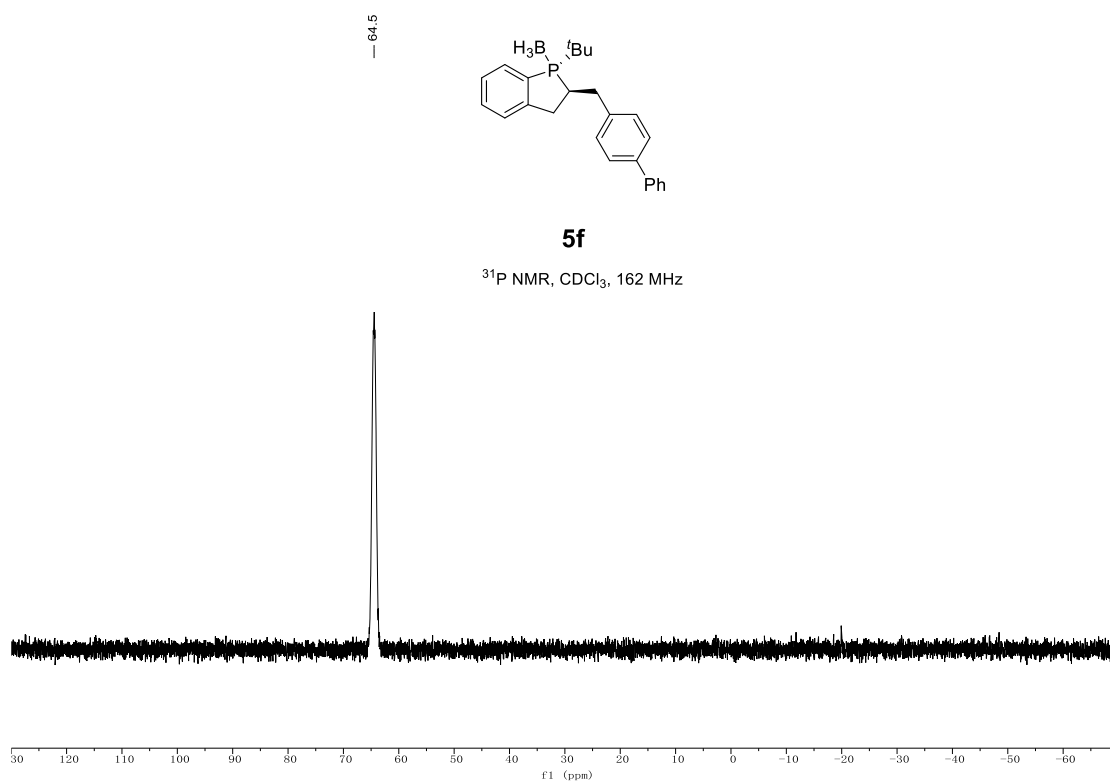

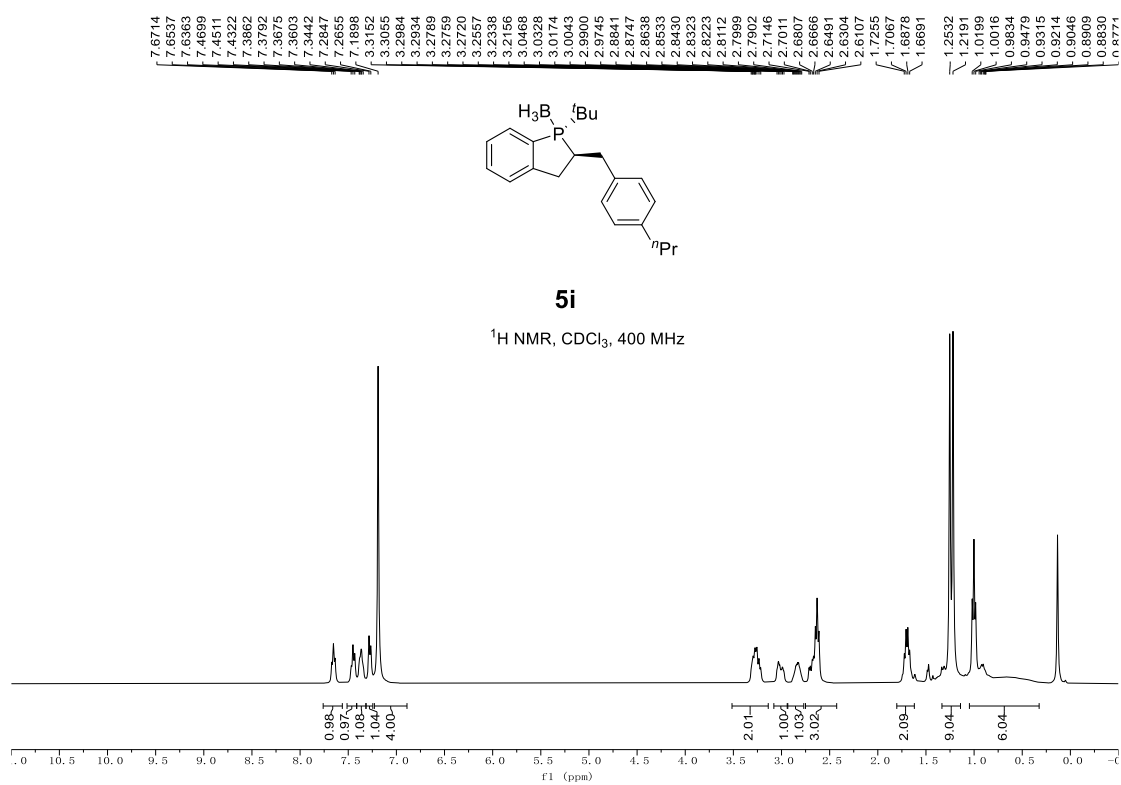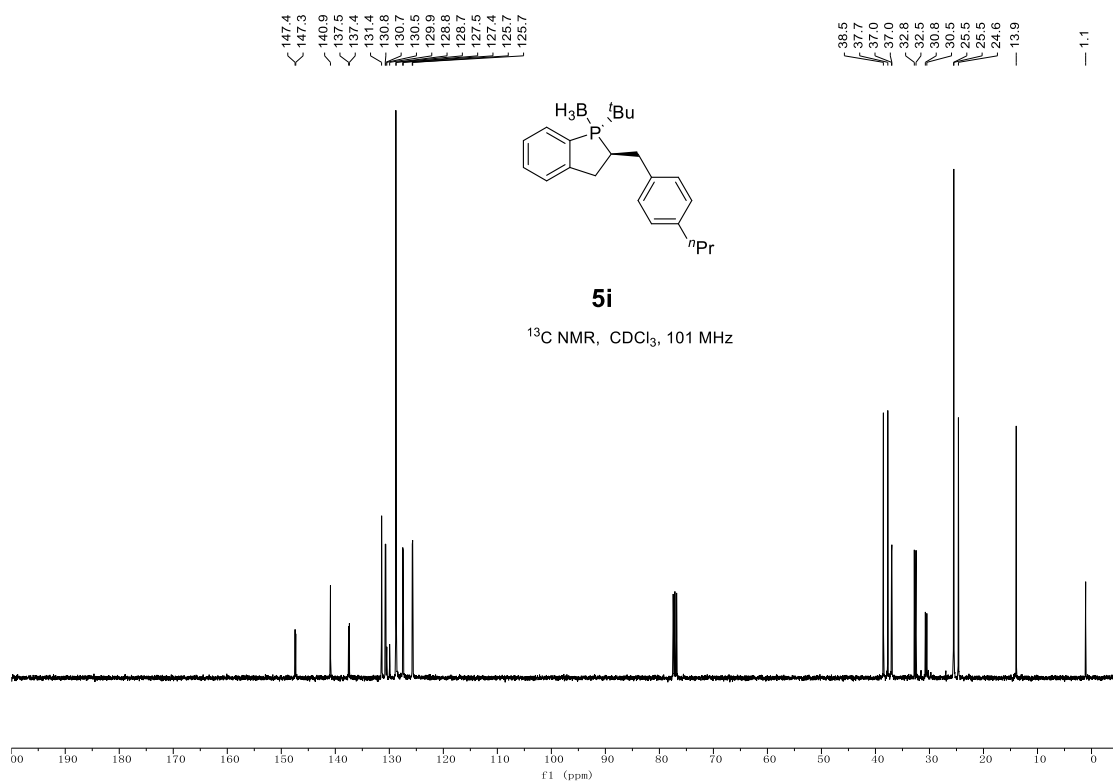

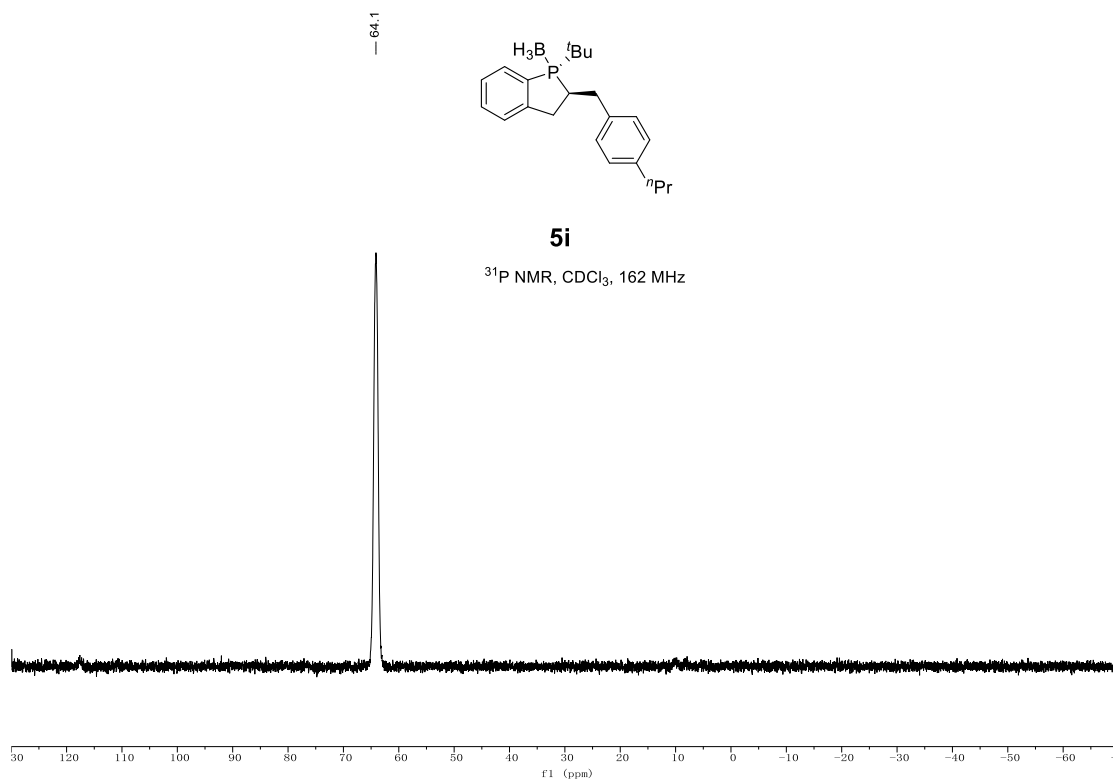

7.8257  
7.8081  
7.8037  
7.7983  
7.7804  
7.4391  
7.4202  
7.4021  
7.3892  
7.3705  
7.3519  
7.2698  
7.2500  
7.2364  
7.2174  
7.1991  
7.1845  
3.2945  
3.2860  
3.2730  
3.2229  
3.2139  
3.2031  
3.1914  
3.1826  
3.1734  
3.1273  
3.0886  
3.0581  
3.0217  
2.9831  
2.6574  
2.6381  
2.6188  
2.3701  
2.3624  
2.3535  
2.3366  
2.3277  
2.3196  
2.3106  
2.2932  
2.2816  
2.2294  
2.2105  
2.1962  
2.1862  
1.7103  
1.6915  
1.6729  
1.2383  
1.2041  
1.1667  
1.1454  
1.1145  
1.0776  
1.0440  
1.0253  
1.0070  
0.9887  
0.9395  
0.9316  
0.9150  
0.8872  
0.8488  
0.8322  
0.6867

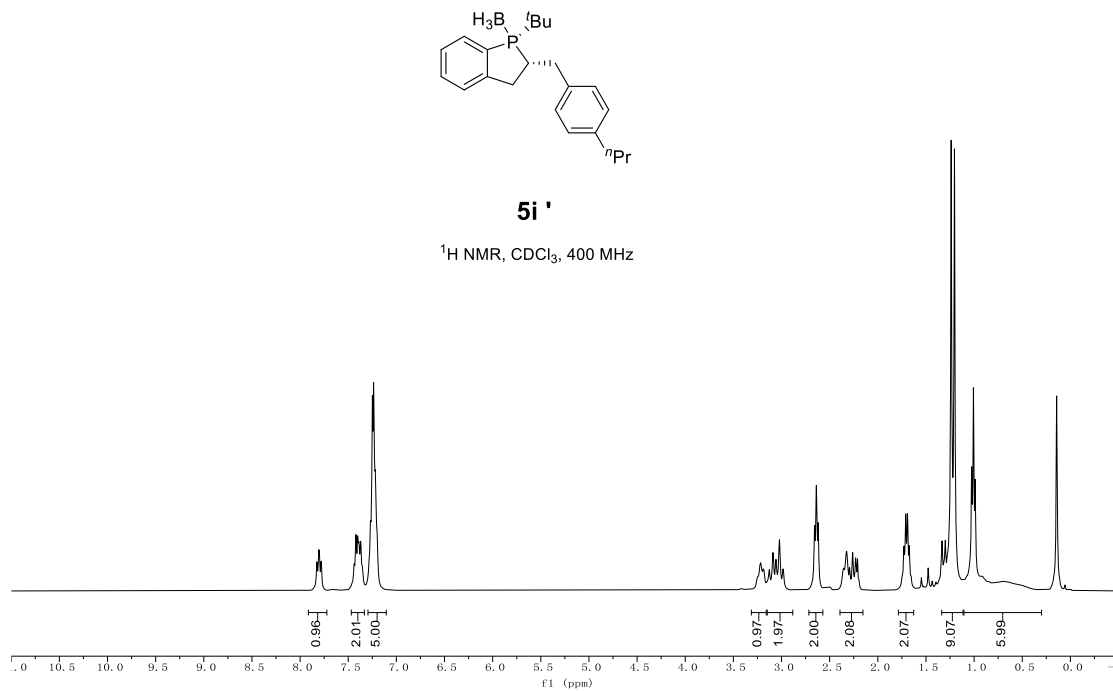

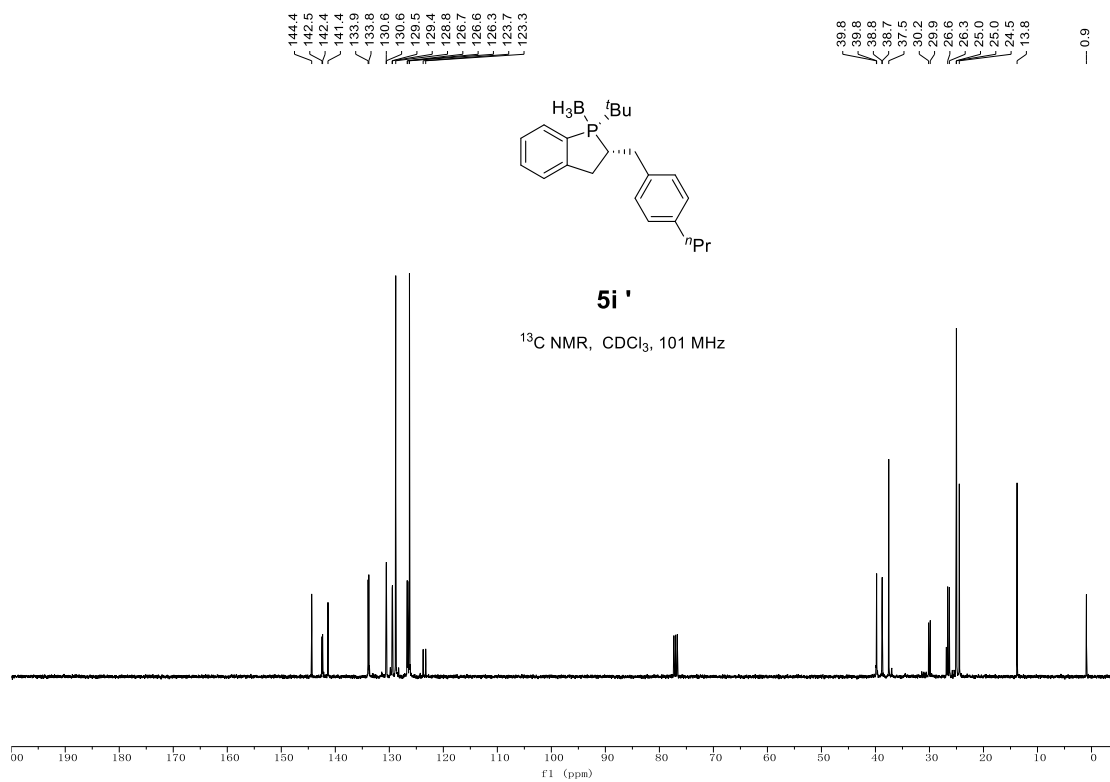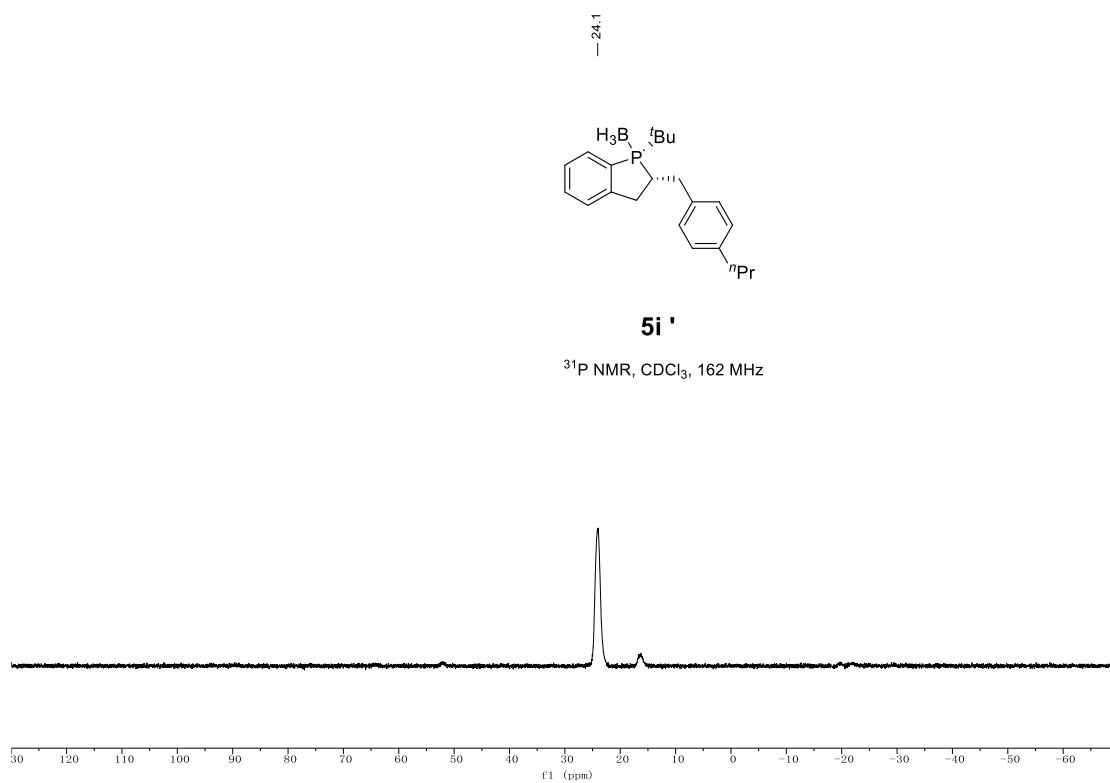

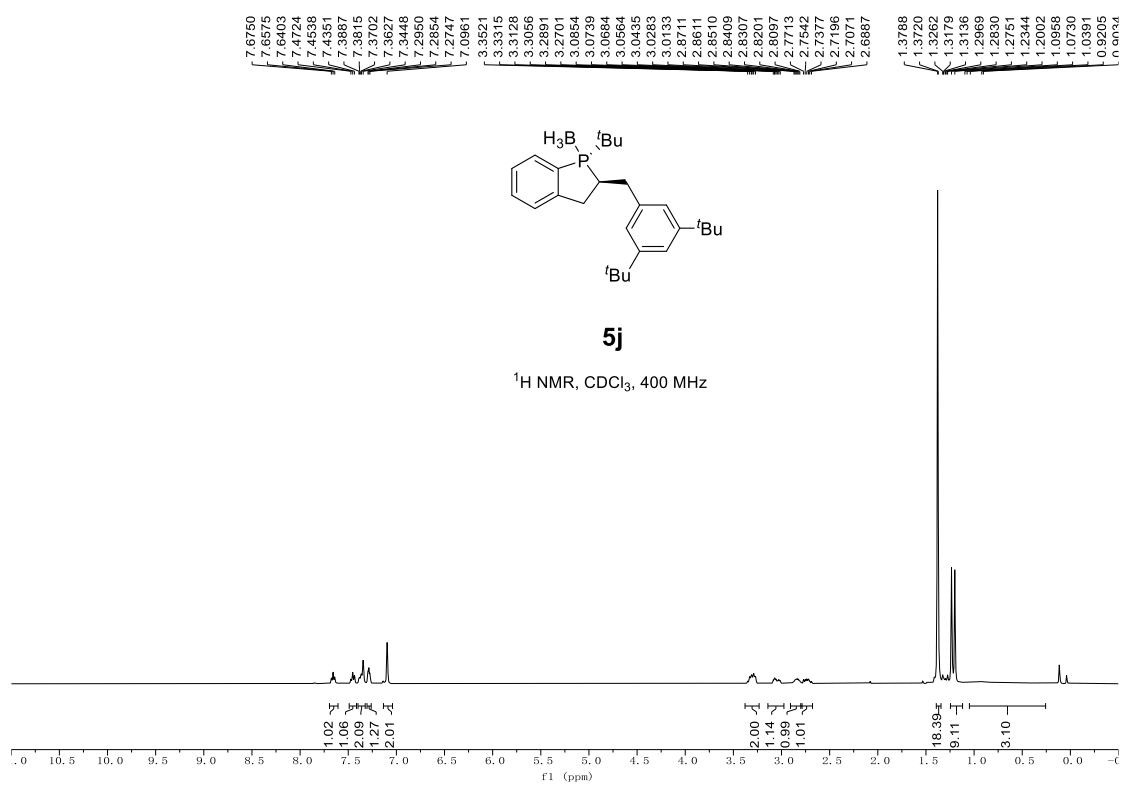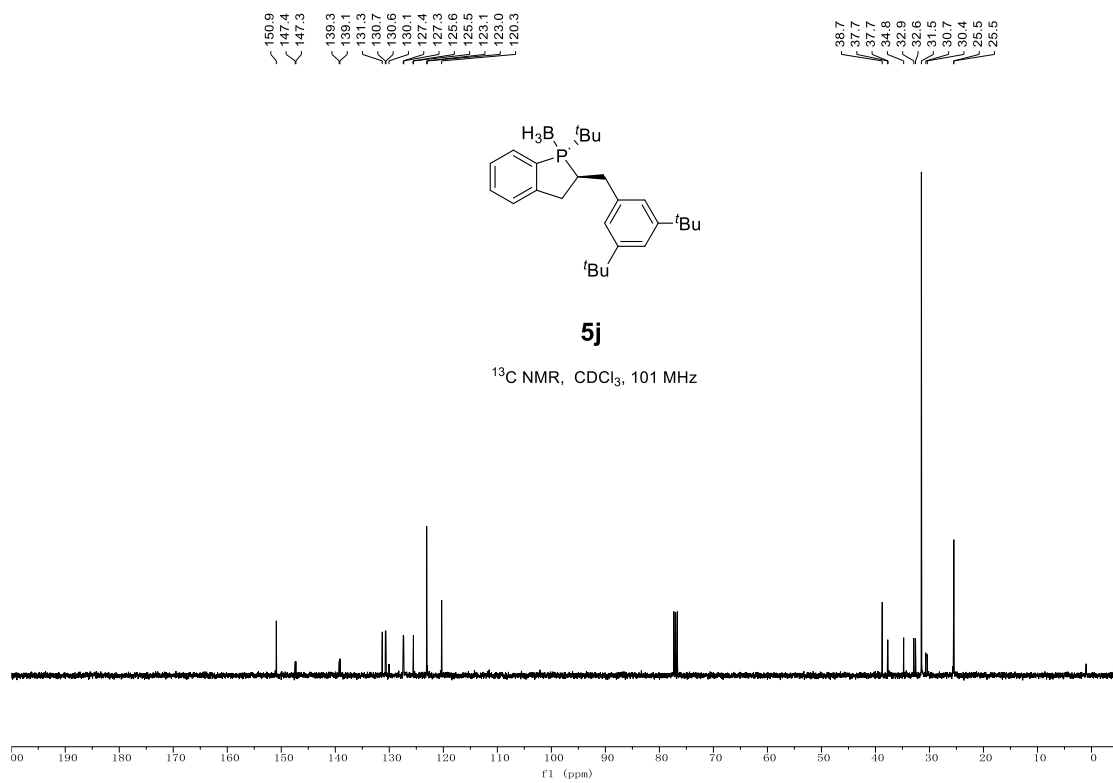

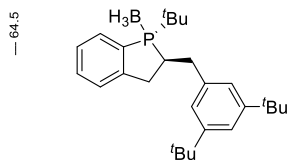

**5j**

<sup>31</sup>P NMR, CDCl<sub>3</sub>, 162 MHz

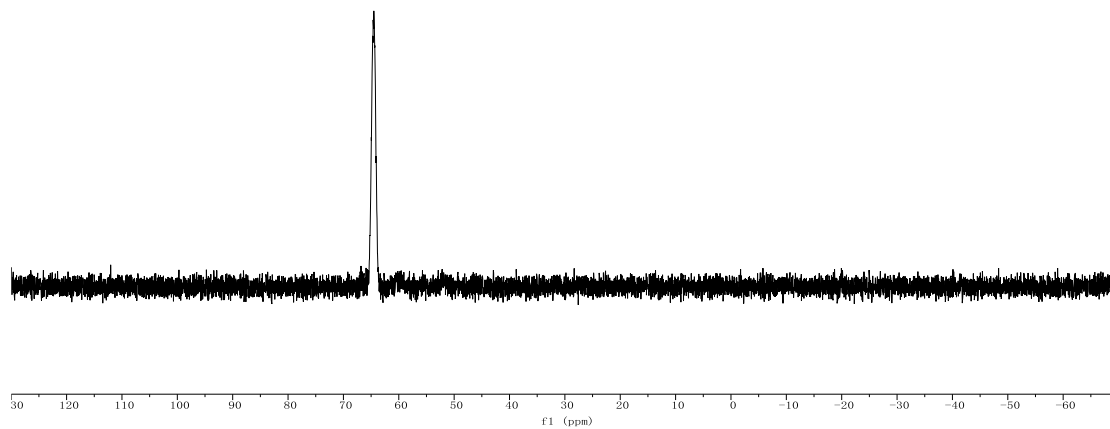

7.8257  
7.8078  
7.8030  
7.7991  
7.7954  
7.7812  
7.7765  
7.4367  
7.4346  
7.4150  
7.4150  
7.3995  
7.3953  
7.3911  
7.3721  
7.3535  
7.2855  
7.2246  
7.2082  
7.2021  
7.1688  
7.1598  
7.1560  
7.1519  
7.1323  
7.1282  
7.1240  
3.2421  
3.2336  
3.2102  
3.2017  
3.1610  
3.1237  
3.0824  
3.0549  
3.0474  
3.0106  
3.0106  
2.3924  
2.3843  
2.3657  
2.3594  
2.3557  
2.3497  
2.2895  
2.2579  
2.2254  
1.4009  
1.3920  
1.3885  
1.3800  
1.2464  
1.2432  
1.2121  
1.2089

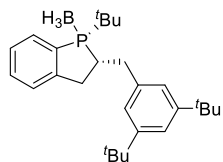

**5j'**

<sup>1</sup>H NMR, CDCl<sub>3</sub>, 400 MHz

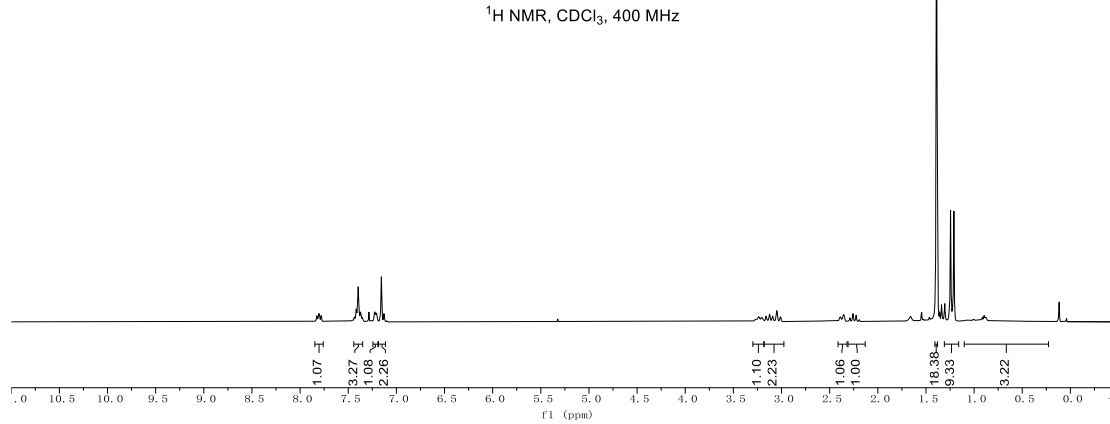

151.3  
144.6  
144.5  
144.4  
134.1  
133.9  
130.6  
130.6  
129.6  
129.5  
126.7  
126.6  
123.9  
123.4  
121.1  
120.6  
120.5

39.8  
39.7  
34.9  
31.5  
30.2  
29.9  
27.0  
27.0  
26.7  
25.2  
25.1

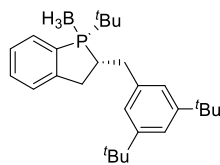

**5j'**

<sup>13</sup>C NMR, CDCl<sub>3</sub>, 101 MHz

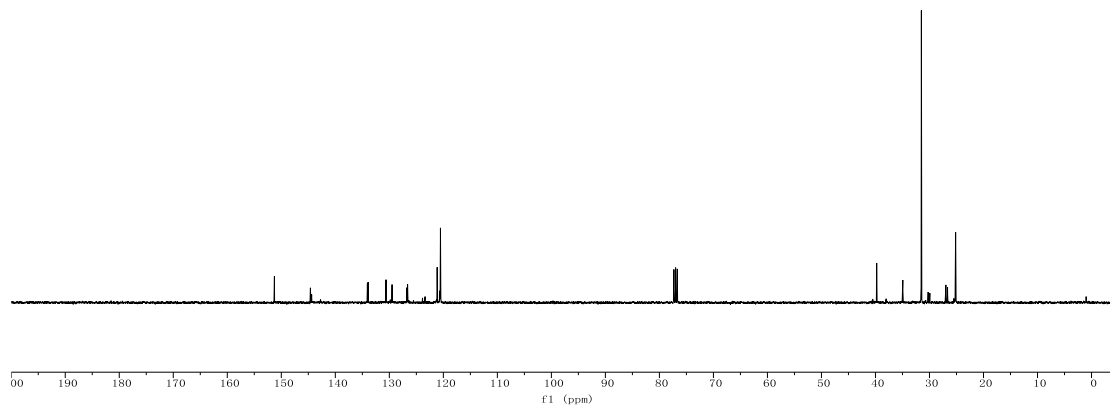

-24.2

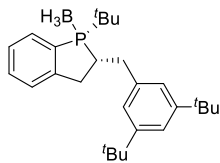

**5j'**

<sup>31</sup>P NMR, CDCl<sub>3</sub>, 162 MHz

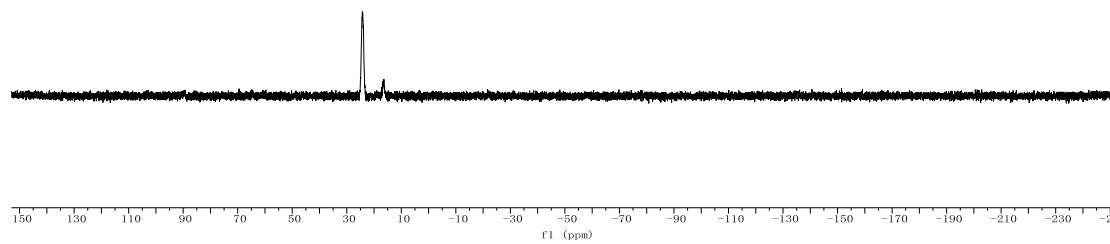

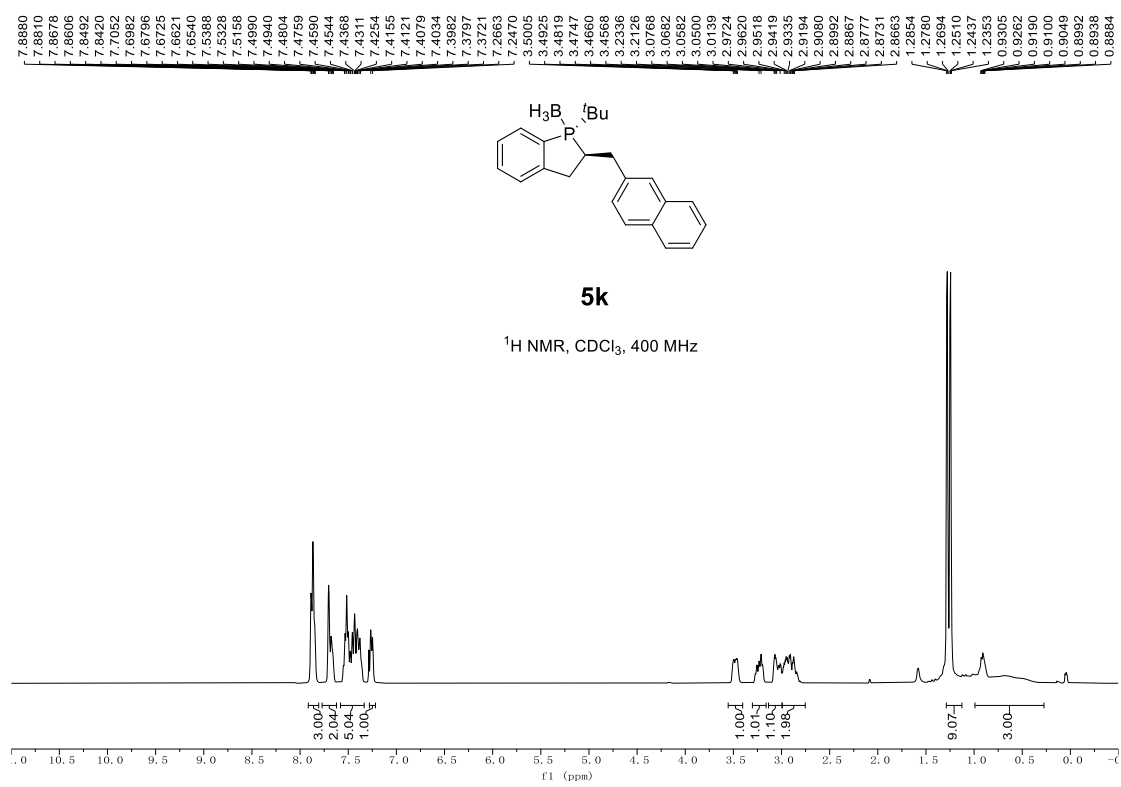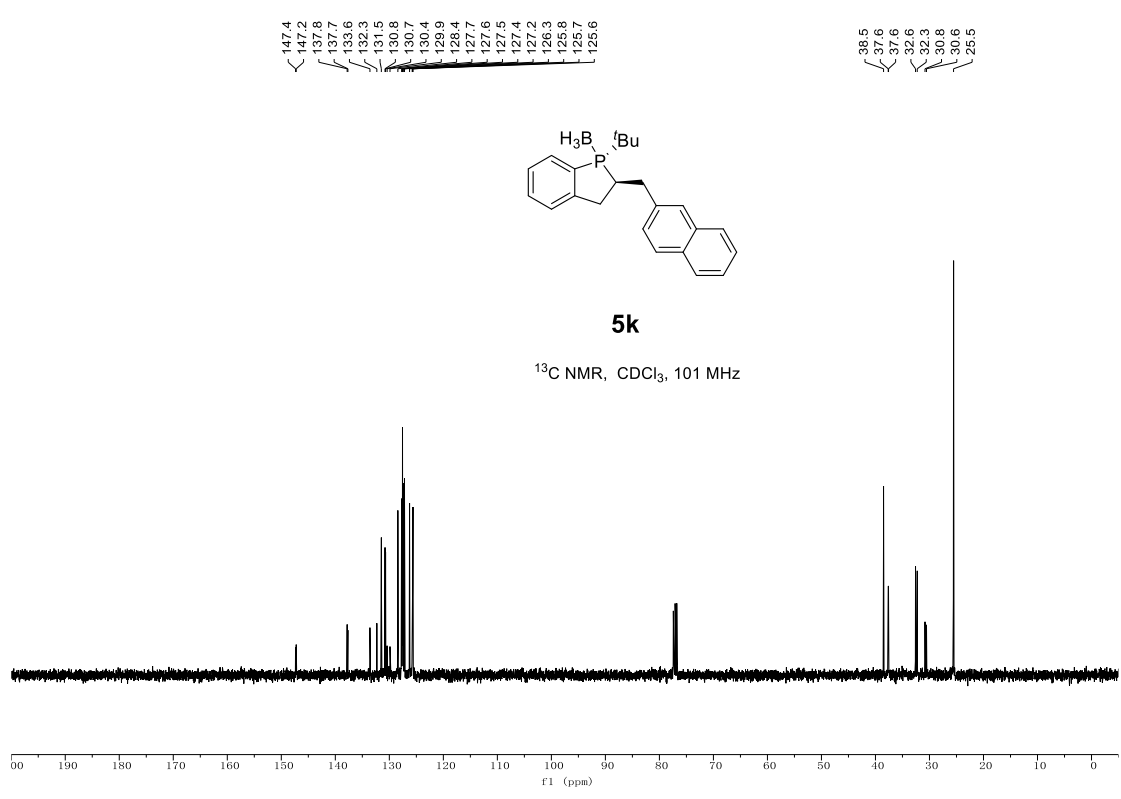



- 64.3

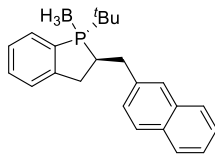

**5k**

$^{31}\text{P}$  NMR,  $\text{CDCl}_3$ , 162 MHz

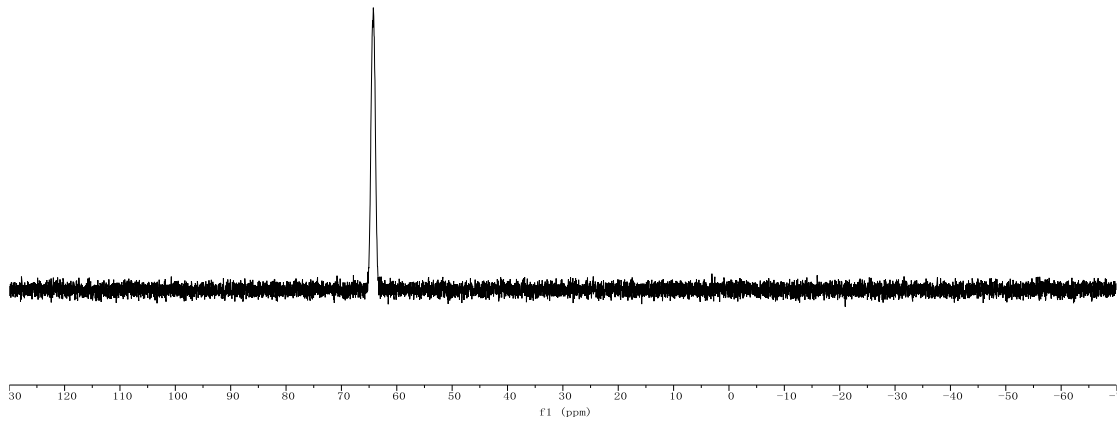

7.6561  
7.6530  
7.6367  
7.6193  
7.4761  
7.4611  
7.4574  
7.4538  
7.4423  
7.4386  
7.4350  
7.3886  
7.3861  
7.3807  
7.3781  
7.3723  
7.3699  
7.3673  
7.3646  
7.3620  
7.3594  
7.3014  
7.2967  
7.2941  
7.2894  
7.2846  
7.2786  
7.2328  
7.2298  
7.2200  
7.2170  
7.0038  
6.9952  
6.9909  
6.9125  
6.9099  
6.9077  
6.9048  
6.9011  
6.8990  
6.8967  
3.4331  
3.4303  
3.4248  
3.4221  
3.4175  
3.4150  
3.4084  
3.3867  
3.3721  
3.3662  
3.3645  
3.0985  
3.0909  
3.0803  
3.0227  
3.0088  
2.9917  
2.9843  
2.9777  
2.9553  
2.9396  
2.8365  
2.8263  
2.8161  
2.8053  
2.7953  
1.2339  
1.1896  
0.9074  
0.8875

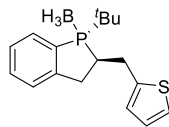

**5l**

$^1\text{H}$  NMR,  $\text{CDCl}_3$ , 400 MHz

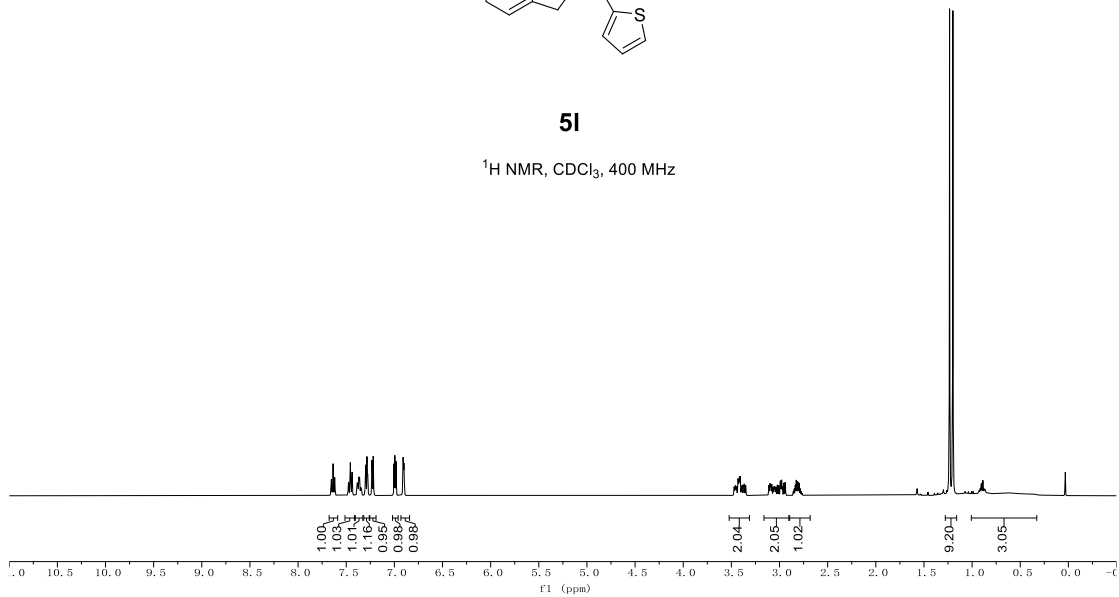

S113

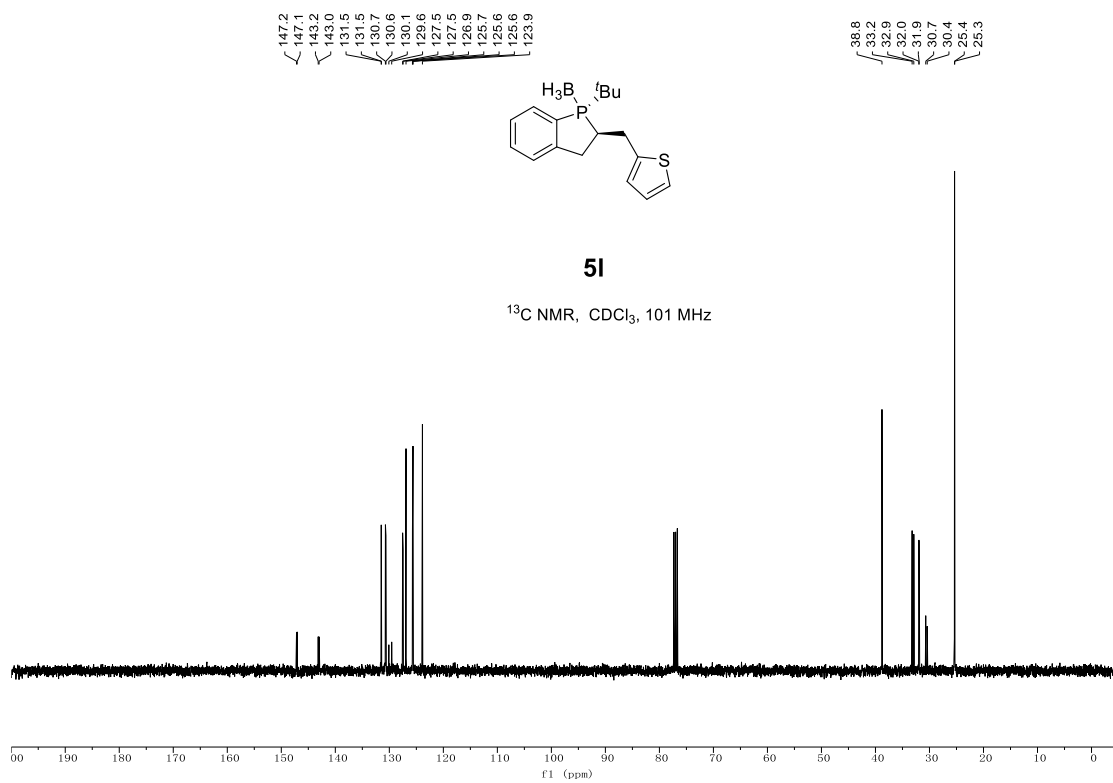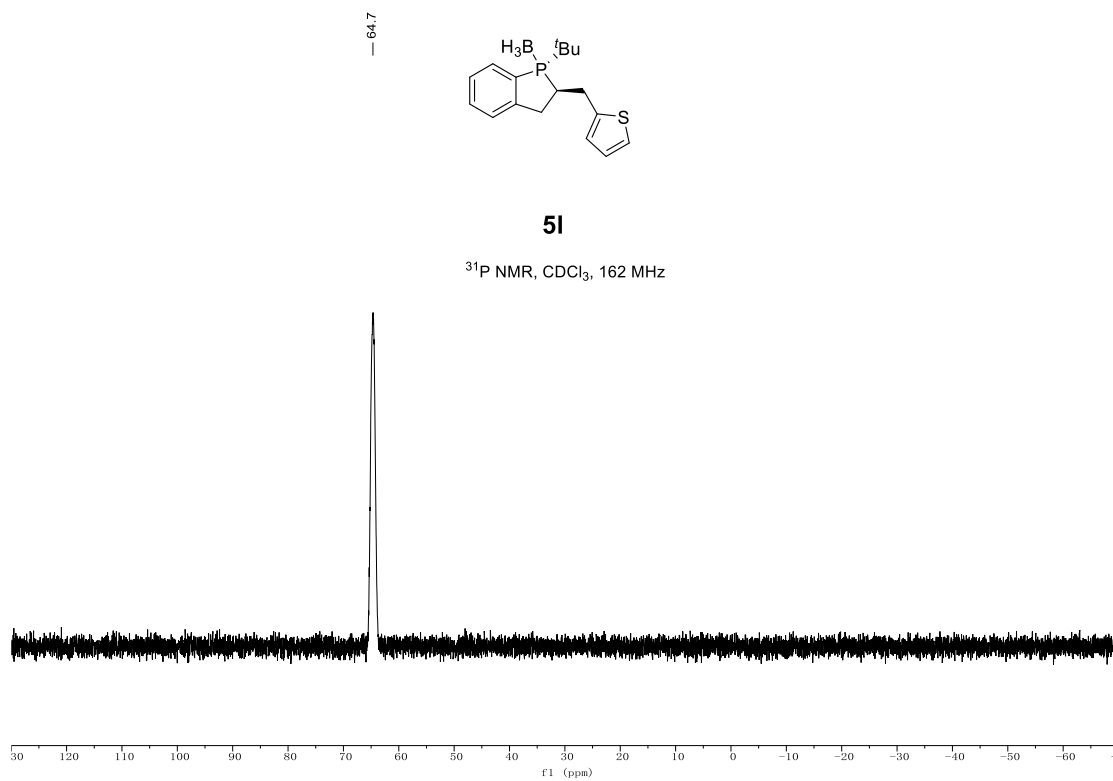

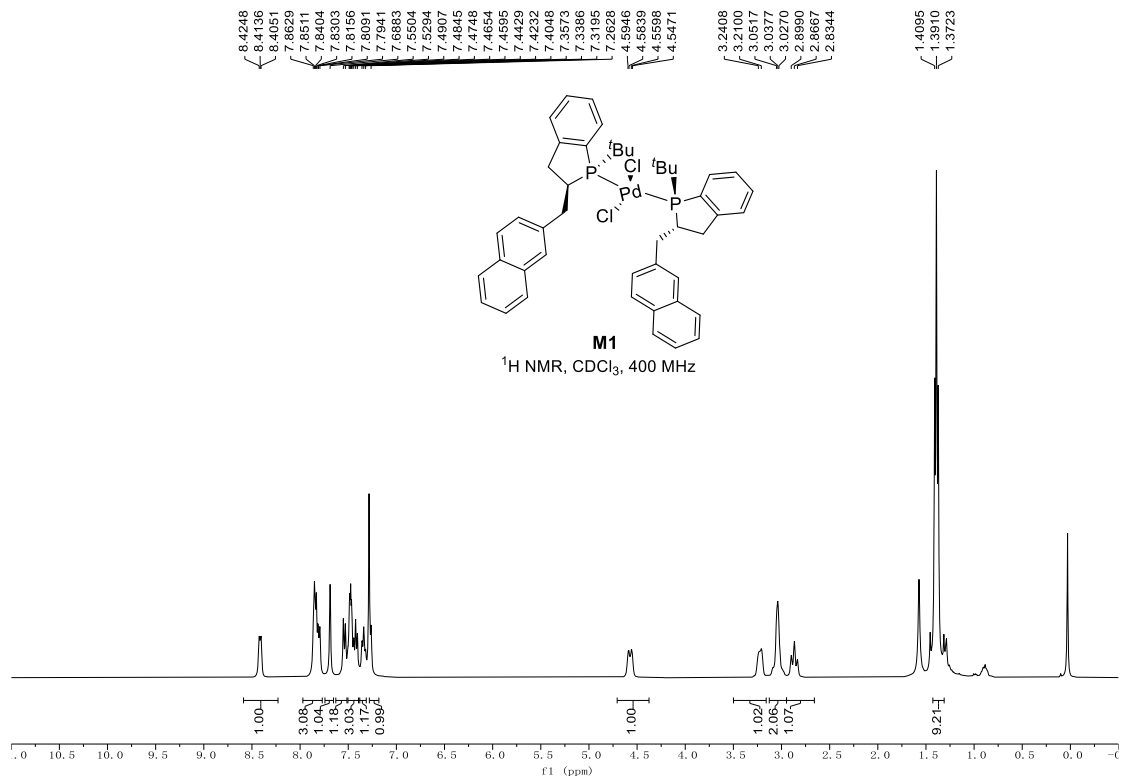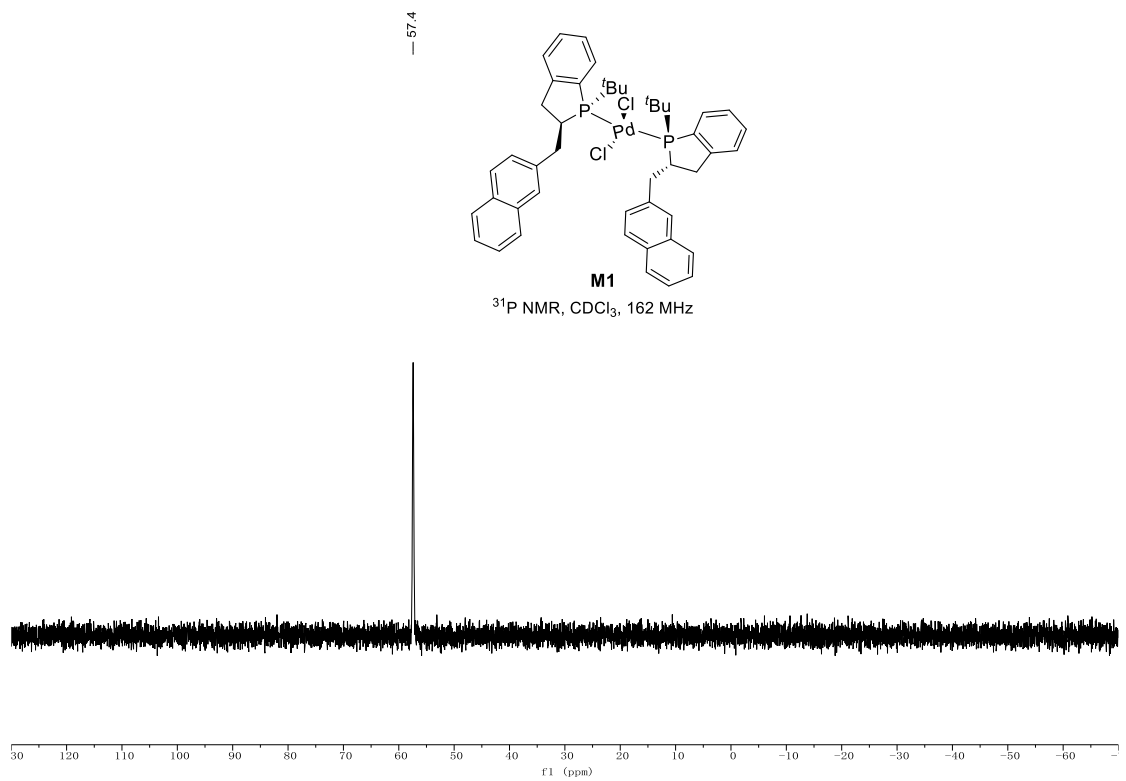

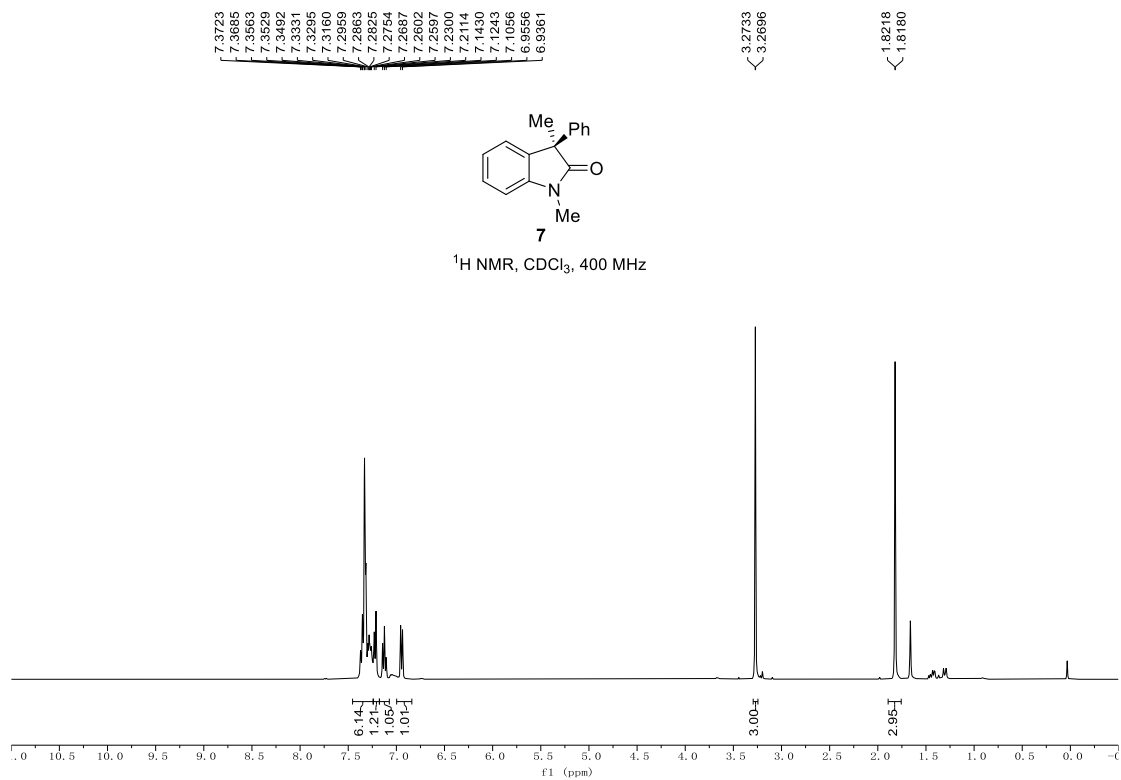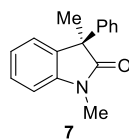

<sup>1</sup>H NMR, CDCl<sub>3</sub>, 400 MHz

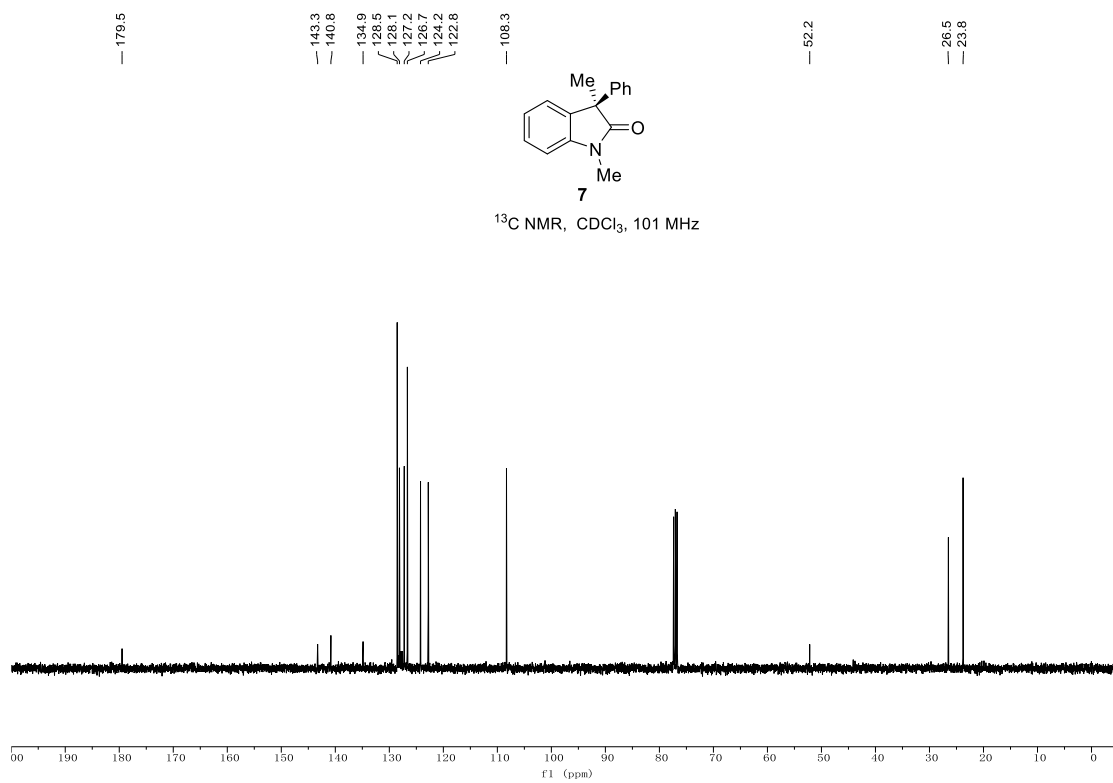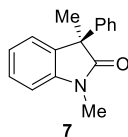

<sup>13</sup>C NMR, CDCl<sub>3</sub>, 101 MHz

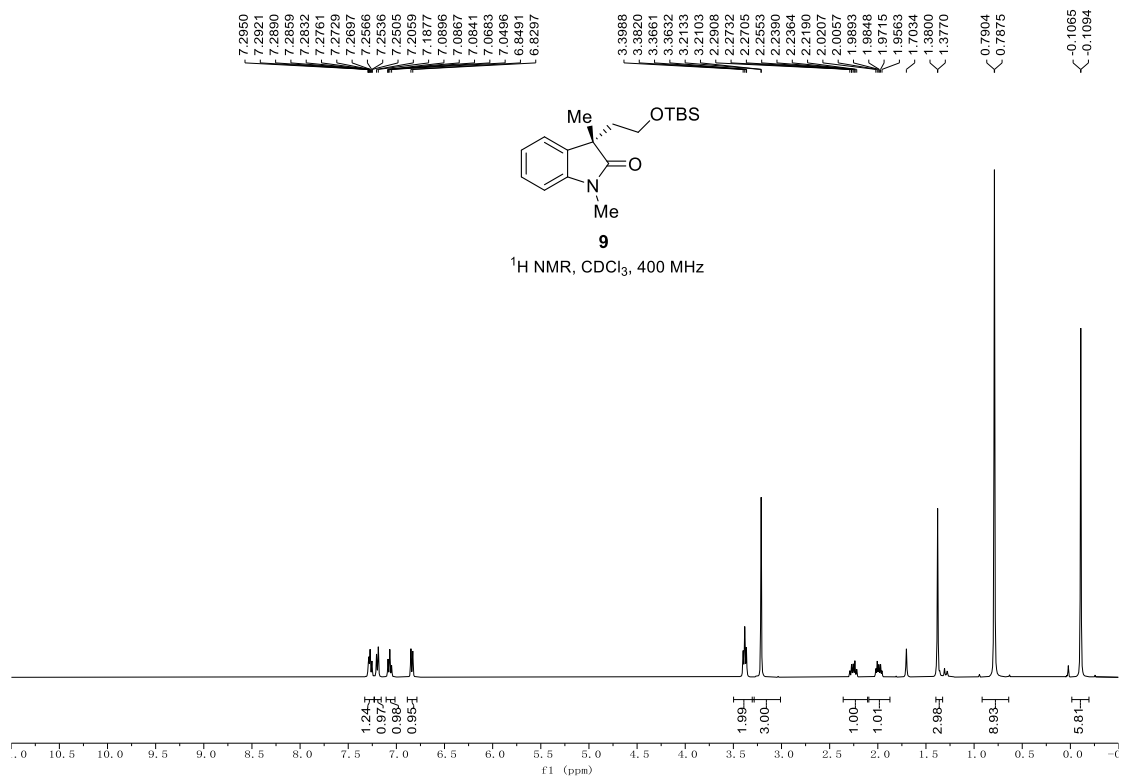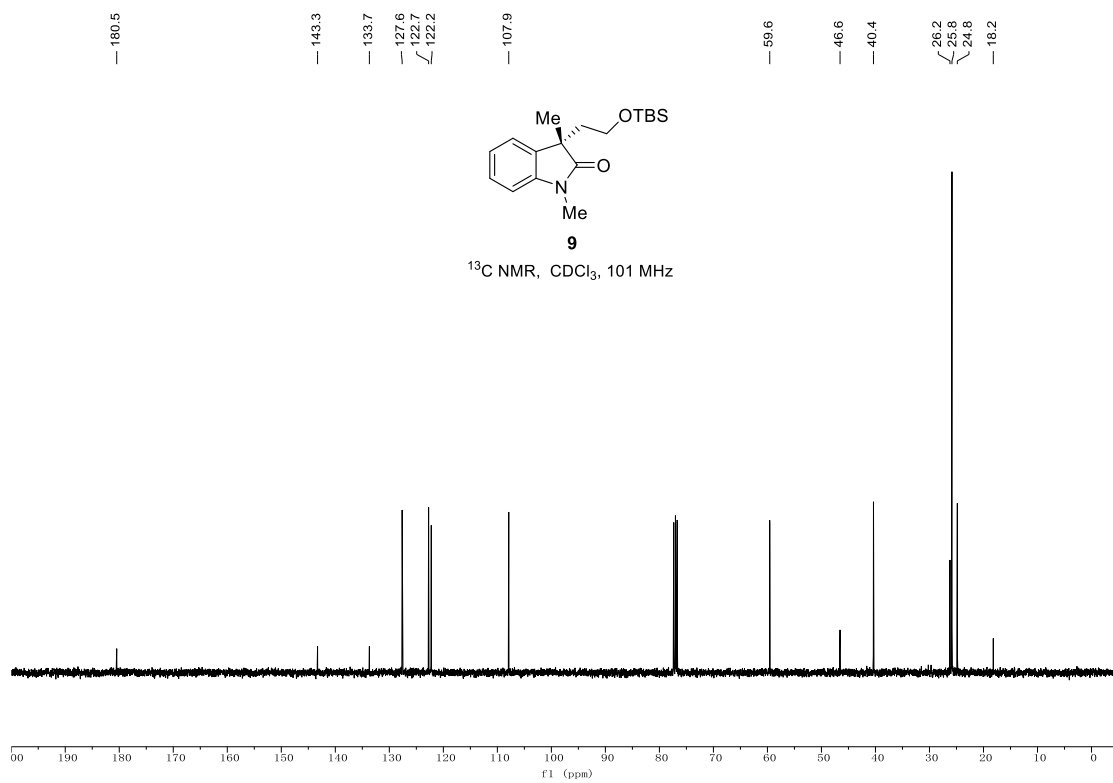

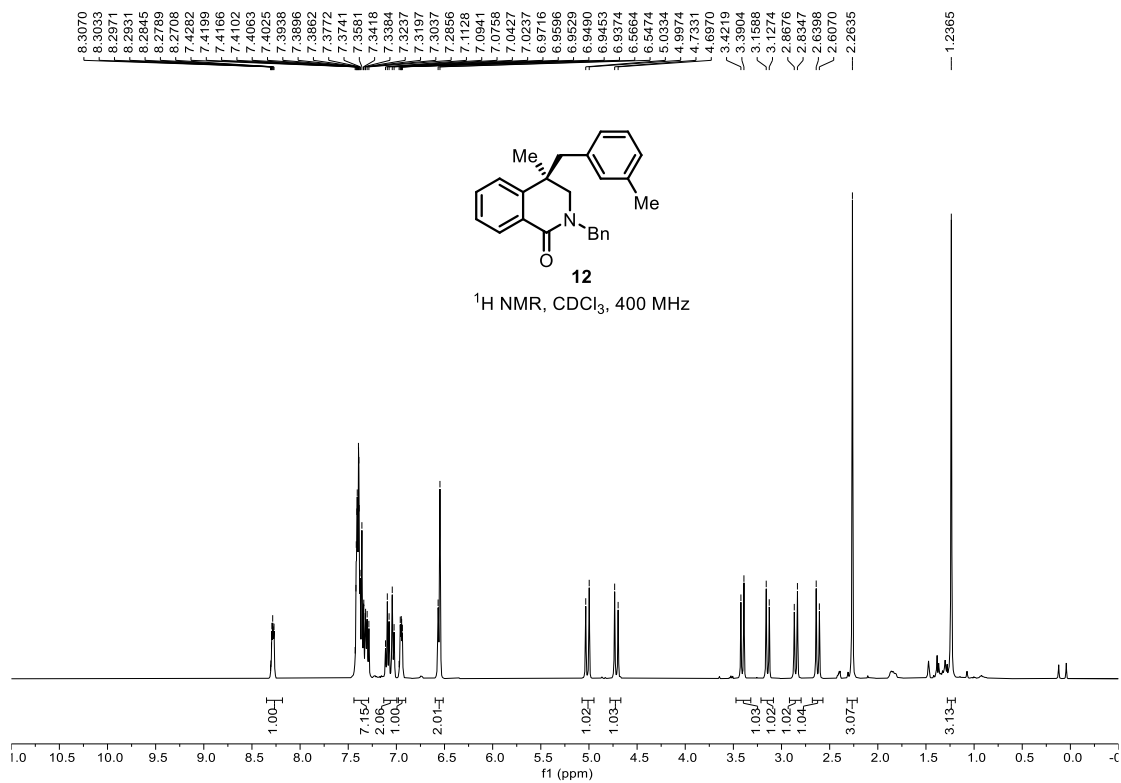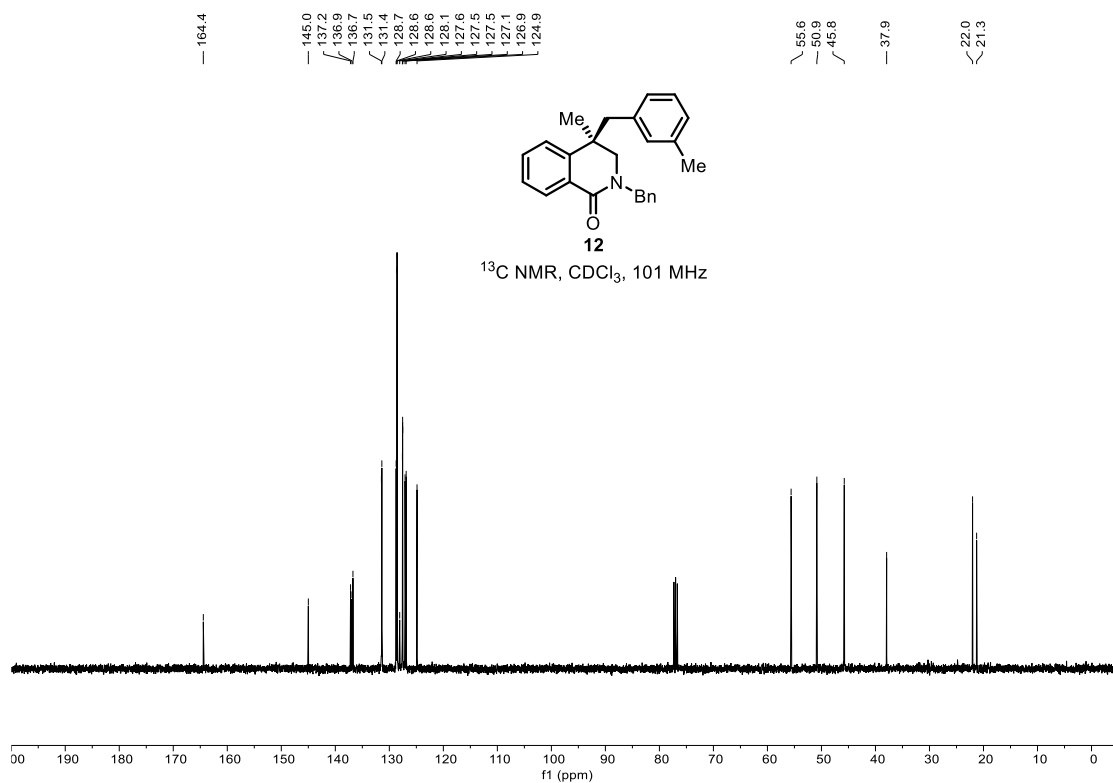

Supplement: d1qo01819a1.pdf [file d1qo01819a1.pdf]
